# Supplementary material
Source: publisher figshare collection journal article supplement (https://acs.figshare.com/ndownloader/files/3787564)
Supplement: Supplementary file 1 [file 3787564]

## Sheet: Identified peptides
peptide sequence	initial peptide probability	peptide sequence stripped	Uniprot ID	Peptide	Next AA
AFEN[115]VTDLQWLILDHNLLENSK	0.9999	AFENVTDLQWLILDHNLLENSK	LUM_HUMAN	AFENVTDLQWLILDHNLLENSK	I
LGSFEGLVN[115]LTFIHLQHNR	0.9999	LGSFEGLVNLTFIHLQHNR	LUM_HUMAN	LGSFEGLVNLTFIHLQHNR	L
LHINHNN[115]LTESVGPLPK	0.9999	LHINHNNLTESVGPLPK	LUM_HUMAN	LHINHNNLTESVGPLPK	S
LSHNELADSGIPGNSFN[115]VSSLVELDLSYNK	0.9999	LSHNELADSGIPGNSFNVSSLVELDLSYNK	LUM_HUMAN	LSHNELADSGIPGNSFNVSSLVELDLSYNK	L
IADTN[115]ITSIPQGLPPSLTELHLDGNK	0.9999	IADTNITSIPQGLPPSLTELHLDGNK	PGS2_HUMAN	IADTNITSIPQGLPPSLTELHLDGNK	I
LGLSFNSISAVDN[115]GSLANTPHLR	0.9999	LGLSFNSISAVDNGSLANTPHLR	PGS2_HUMAN	LGLSFNSISAVDNGSLANTPHLR	E
YIQVVYLHNNN[115]ISVVGSSDFCPPGHNTK	0.9999	YIQVVYLHNNNISVVGSSDFCPPGHNTK	PGS2_HUMAN	YIQVVYLHNNNISVVGSSDFCPPGHNTK	K
LLQVVYLHSNN[115]ITK	0.9999	LLQVVYLHSNNITK	PGS1_HUMAN	LLQVVYLHSNNITK	V
MIEN[115]GSLSFLPTLR	0.9999	MIENGSLSFLPTLR	PGS1_HUMAN	MIENGSLSFLPTLR	E
M[147]IEN[115]GSLSFLPTLR	0.9999	MIENGSLSFLPTLR	PGS1_HUMAN	MIENGSLSFLPTLR	E
EDALN[115]ETR	0.9999	EDALNETR	CLUS_HUMAN	EDALNETR	E
ELPGVCN[115]ETM[147]M[147]ALWEECKPCLK	0.9999	ELPGVCNETMMALWEECKPCLK	CLUS_HUMAN	ELPGVCNETMMALWEECKPCLK	Q
HN[115]STGCLR	0.9999	HNSTGCLR	CLUS_HUMAN	HNSTGCLR	M
LAN[115]LTQGEDQYYLR	0.9999	LANLTQGEDQYYLR	CLUS_HUMAN	LANLTQGEDQYYLR	V
MLN[115]TSSLLEQLNEQFNWVSR	0.9999	MLNTSSLLEQLNEQFNWVSR	CLUS_HUMAN	MLNTSSLLEQLNEQFNWVSR	L
M[147]LN[115]TSSLLEQLNEQFNWVSR	0.9999	MLNTSSLLEQLNEQFNWVSR	CLUS_HUMAN	MLNTSSLLEQLNEQFNWVSR	L
DQCIVDDITYNVN[115]DTFHKR	0.9999	DQCIVDDITYNVNDTFHKR	FINC_HUMAN	DQCIVDDITYNVNDTFHKR	H
HEEGHMLN[115]CTCFGQGR	0.9999	HEEGHMLNCTCFGQGR	FINC_HUMAN	HEEGHMLNCTCFGQGR	G
HEEGHM[147]LN[115]CTCFGQGR	0.9999	HEEGHMLNCTCFGQGR	FINC_HUMAN	HEEGHMLNCTCFGQGR	G
LDAPTNLQFVN[115]ETDSTVLVR	0.9999	LDAPTNLQFVNETDSTVLVR	FINC_HUMAN	LDAPTNLQFVNETDSTVLVR	W
GGNSNGALCHFPFLYNNHN[115]YTDCTSEGR	0.9999	GGNSNGALCHFPFLYNNHNYTDCTSEGR	FINC_HUMAN	GGNSNGALCHFPFLYNNHNYTDCTSEGR	R
VVLHPN[115]YSQVDIGLIK	0.9999	VVLHPNYSQVDIGLIK	HPT_HUMAN	VVLHPNYSQVDIGLIK	L
LGN[115]WSAMPSCK	0.9999	LGNWSAMPSCK	APOH_HUMAN	LGNWSAMPSCK	A
LGN[115]WSAM[147]PSCK	0.9999	LGNWSAMPSCK	APOH_HUMAN	LGNWSAMPSCK	A
VYKPSAGN[115]NSLYR	0.9999	VYKPSAGNNSLYR	APOH_HUMAN	VYKPSAGNNSLYR	D
DTAVFECLPQHAMFGN[115]DTITCTTHGN[115]WTK	0.9999	DTAVFECLPQHAMFGNDTITCTTHGNWTK	APOH_HUMAN	DTAVFECLPQHAMFGNDTITCTTHGNWTK	L
DTAVFECLPQHAM[147]FGNDTITCTTHGN[115]WTK	0.9999	DTAVFECLPQHAMFGNDTITCTTHGNWTK	APOH_HUMAN	DTAVFECLPQHAMFGNDTITCTTHGNWTK	L
DTAVFECLPQHAM[147]FGN[115]DTITCTTHGN[115]WTK	0.9999	DTAVFECLPQHAMFGNDTITCTTHGNWTK	APOH_HUMAN	DTAVFECLPQHAMFGNDTITCTTHGNWTK	L
DTAVFECLPQHAM[147]FGN[115]DTITCTTHGNWTK	0.9999	DTAVFECLPQHAMFGNDTITCTTHGNWTK	APOH_HUMAN	DTAVFECLPQHAMFGNDTITCTTHGNWTK	L
DIVEYYNDSN[115]GSHVLQGR	0.9999	DIVEYYNDSNGSHVLQGR	ZA2G_HUMAN	DIVEYYNDSNGSHVLQGR	F
DIVEYYN[115]DSNGSHVLQGR	0.9999	DIVEYYNDSNGSHVLQGR	ZA2G_HUMAN	DIVEYYNDSNGSHVLQGR	F
DIVEYYN[115]DSN[115]GSHVLQGR	0.9999	DIVEYYNDSNGSHVLQGR	ZA2G_HUMAN	DIVEYYNDSNGSHVLQGR	F
FGCEIENN[115]R	0.9999	FGCEIENNR	ZA2G_HUMAN	FGCEIENNR	S
ALPQPQN[115]VTSLLGCTH	0.9999	ALPQPQNVTSLLGCTH	HEMO_HUMAN	ALPQPQNVTSLLGCTH	-
N[115]GTGHGN[115]STHHGPEYMR	0.9999	NGTGHGNSTHHGPEYMR	HEMO_HUMAN	NGTGHGNSTHHGPEYMR	C
N[115]GTGHGN[115]STHHGPEYM[147]R	0.9999	NGTGHGNSTHHGPEYMR	HEMO_HUMAN	NGTGHGNSTHHGPEYMR	C
SWPAVGN[115]CSSALR	0.9999	SWPAVGNCSSALR	HEMO_HUMAN	SWPAVGNCSSALR	W
N[115]GTGHGNSTHHGPEYM[147]R	0.9999	NGTGHGNSTHHGPEYMR	HEMO_HUMAN	NGTGHGNSTHHGPEYMR	C
AAIPSALDTN[115]SSK	0.9999	AAIPSALDTNSSK	LG3BP_HUMAN	AAIPSALDTNSSK	S
ALGFEN[115]ATQALGR	0.9999	ALGFENATQALGR	LG3BP_HUMAN	ALGFENATQALGR	A
DAGVVCTN[115]ETR	0.9999	DAGVVCTNETR	LG3BP_HUMAN	DAGVVCTNETR	S
EPGSN[115]VTMSVDAECVPM[147]VR	0.9999	EPGSNVTMSVDAECVPMVR	LG3BP_HUMAN	EPGSNVTMSVDAECVPMVR	D
EPGSN[115]VTM[147]SVDAECVPMVR	0.9999	EPGSNVTMSVDAECVPMVR	LG3BP_HUMAN	EPGSNVTMSVDAECVPMVR	D
EPGSN[115]VTM[147]SVDAECVPM[147]VR	0.9999	EPGSNVTMSVDAECVPMVR	LG3BP_HUMAN	EPGSNVTMSVDAECVPMVR	D
GLN[115]LTEDTYKPR	0.9999	GLNLTEDTYKPR	LG3BP_HUMAN	GLNLTEDTYKPR	I
AWGTPCEMCPAVN[115]TSEYK	0.9999	AWGTPCEMCPAVNTSEYK	FBN1_HUMAN	AWGTPCEMCPAVNTSEYK	I
AWGTPCEM[147]CPAVN[115]TSEYK	0.9999	AWGTPCEMCPAVNTSEYK	FBN1_HUMAN	AWGTPCEMCPAVNTSEYK	I
DACGN[115]GTCR	0.9999	DACGNGTCR	FBN1_HUMAN	DACGNGTCR	N
NYYADN[115]QTCDGELLFN[115]MTK	0.9999	NYYADNQTCDGELLFNMTK	FBN1_HUMAN	NYYADNQTCDGELLFNMTK	K
VLPVN[115]VTDYCQLVR	0.9999	VLPVNVTDYCQLVR	FBN1_HUMAN	VLPVNVTDYCQLVR	Y
GTFTDCALAN[115]MTEQIR	0.9999	GTFTDCALANMTEQIR	CO6A2_HUMAN	GTFTDCALANMTEQIR	Q
N[115]MTLFSDLVAEK	0.9999	NMTLFSDLVAEK	CO6A2_HUMAN	NMTLFSDLVAEK	F
HAELSFVFLTDGVTGN[115]DSLHESAHSM[147]R	0.9999	HAELSFVFLTDGVTGNDSLHESAHSMR	CO6A2_HUMAN	HAELSFVFLTDGVTGNDSLHESAHSMR	K
HAELSFVFLTDGVTGN[115]DSLHESAHSMR	0.9999	HAELSFVFLTDGVTGNDSLHESAHSMR	CO6A2_HUMAN	HAELSFVFLTDGVTGNDSLHESAHSMR	K
YLGN[115]ATAIFFLPDEGK	0.9999	YLGNATAIFFLPDEGK	A1AT_HUMAN	YLGNATAIFFLPDEGK	L
ADTHDEILEGLNFN[115]LTEIPEAQIHEGFQELLR	0.9999	ADTHDEILEGLNFNLTEIPEAQIHEGFQELLR	A1AT_HUMAN	ADTHDEILEGLNFNLTEIPEAQIHEGFQELLR	T
QLAHQSN[115]STNIFFSPVSIATAFAM[147]LSLGTK	0.9999	QLAHQSNSTNIFFSPVSIATAFAMLSLGTK	A1AT_HUMAN	QLAHQSNSTNIFFSPVSIATAFAMLSLGTK	A
DLQSLEDILHQVEN[115]K	0.9999	DLQSLEDILHQVENK	FIBG_HUMAN	DLQSLEDILHQVENK	T
DN[115]ATEEEILVYLEK	0.9999	DNATEEEILVYLEK	SAP_HUMAN	DNATEEEILVYLEK	T
TN[115]STFVQALVEHVK	0.9999	TNSTFVQALVEHVK	SAP_HUMAN	TNSTFVQALVEHVK	E
AALAAFNAQNN[115]GSNFQLEEISR	0.9999	AALAAFNAQNNGSNFQLEEISR	FETUA_HUMAN	AALAAFNAQNNGSNFQLEEISR	A
VCQDCPLLAPLN[115]DTR	0.9999	VCQDCPLLAPLNDTR	FETUA_HUMAN	VCQDCPLLAPLNDTR	V
FEN[115]QTGFPPPDSR	0.9999	FENQTGFPPPDSR	CSPG2_HUMAN	FENQTGFPPPDSR	F
VVAEN[115]ITQTSR	0.9999	VVAENITQTSR	CSPG2_HUMAN	VVAENITQTSR	E
GQFESVAPSQN[115]FSDSSESDTHPFVIAK	0.9999	GQFESVAPSQNFSDSSESDTHPFVIAK	CSPG2_HUMAN	GQFESVAPSQNFSDSSESDTHPFVIAK	T
FN[115]LTETSEAEIHQSFQHLLR	0.9999	FNLTETSEAEIHQSFQHLLR	AACT_HUMAN	FNLTETSEAEIHQSFQHLLR	T
TLN[115]QSSDELQLSMGNAMFVK	0.9999	TLNQSSDELQLSMGNAMFVK	AACT_HUMAN	TLNQSSDELQLSMGNAMFVK	E
TLN[115]QSSDELQLSMGNAM[147]FVK	0.9999	TLNQSSDELQLSMGNAMFVK	AACT_HUMAN	TLNQSSDELQLSMGNAMFVK	E
TLN[115]QSSDELQLSM[147]GNAMFVK	0.9999	TLNQSSDELQLSMGNAMFVK	AACT_HUMAN	TLNQSSDELQLSMGNAMFVK	E
TLN[115]QSSDELQLSM[147]GNAM[147]FVK	0.9999	TLNQSSDELQLSMGNAMFVK	AACT_HUMAN	TLNQSSDELQLSMGNAMFVK	E
YTGN[115]ASALFILPDQDK	0.9999	YTGNASALFILPDQDK	AACT_HUMAN	YTGNASALFILPDQDK	M
IPCSQPPQIEHGTIN[115]SSR	0.9999	IPCSQPPQIEHGTINSSR	CFAH_HUMAN	IPCSQPPQIEHGTINSSR	S
ISEEN[115]ETTCYMGK	0.9999	ISEENETTCYMGK	CFAH_HUMAN	ISEENETTCYMGK	W
ISEEN[115]ETTCYM[147]GK	0.9999	ISEENETTCYMGK	CFAH_HUMAN	ISEENETTCYMGK	W
MDGASN[115]VTCINSR	0.9999	MDGASNVTCINSR	CFAH_HUMAN	MDGASNVTCINSR	W
M[147]DGASN[115]VTCINSR	0.9999	MDGASNVTCINSR	CFAH_HUMAN	MDGASNVTCINSR	W
EVN[115]DTLLVNELK	0.9999	EVNDTLLVNELK	POSTN_HUMAN	EVNDTLLVNELK	S
LM[147]STEASQN[115]ITYHCK	0.9999	LMSTEASQNITYHCK	CO1A1_HUMAN	LMSTEASQNITYHCK	N
ADGTVNQIEGEATPVN[115]LTEPAK	0.9999	ADGTVNQIEGEATPVNLTEPAK	APOD_HUMAN	ADGTVNQIEGEATPVNLTEPAK	L
CIQAN[115]YSLM[147]ENGK	0.9999	CIQANYSLMENGK	APOD_HUMAN	CIQANYSLMENGK	I
GNPGEPGLN[115]GTTGPK	0.9999	GNPGEPGLNGTTGPK	CO6A3_HUMAN	GNPGEPGLNGTTGPK	G
GPPGVN[115]GTQGFQGCPGQR	0.9999	GPPGVNGTQGFQGCPGQR	CO6A3_HUMAN	GPPGVNGTQGFQGCPGQR	G
VAVVQHAPSESVDN[115]ASM[147]PPVK	0.9999	VAVVQHAPSESVDNASMPPVK	CO6A3_HUMAN	VAVVQHAPSESVDNASMPPVK	V
AGLQAFFQVQECN[115]K	0.9999	AGLQAFFQVQECNK	CERU_HUMAN	AGLQAFFQVQECNK	S
EHEGAIYPDN[115]TTDFQR	0.9999	EHEGAIYPDNTTDFQR	CERU_HUMAN	EHEGAIYPDNTTDFQR	A
ELHHLQEQN[115]VSNAFLDK	0.9999	ELHHLQEQNVSNAFLDK	CERU_HUMAN	ELHHLQEQNVSNAFLDK	G
EN[115]LTAPGSDSAVFFEQGTTR	0.9999	ENLTAPGSDSAVFFEQGTTR	CERU_HUMAN	ENLTAPGSDSAVFFEQGTTR	I
DTFVN[115]ASR	0.9999	DTFVNASR	IC1_HUMAN	DTFVNASR	T
VGQLQLSHN[115]LSLVILVPQNLK	0.9999	VGQLQLSHNLSLVILVPQNLK	IC1_HUMAN	VGQLQLSHNLSLVILVPQNLK	H
VLSN[115]NSDANLELINTWVAK	0.9999	VLSNNSDANLELINTWVAK	IC1_HUMAN	VLSNNSDANLELINTWVAK	N
M[147]LFVEPILEVSSLPTTN[115]STTNSATK	0.9999	MLFVEPILEVSSLPTTNSTTNSATK	IC1_HUMAN	MLFVEPILEVSSLPTTNSTTNSATK	I
ASTEQAPELEN[115]LTVTEVGWDGLR	0.9999	ASTEQAPELENLTVTEVGWDGLR	TENA_HUMAN	ASTEQAPELENLTVTEVGWDGLR	L
GN[115]FSTEGCGCVCEPGWK	0.9999	GNFSTEGCGCVCEPGWK	TENA_HUMAN	GNFSTEGCGCVCEPGWK	G
GPN[115]CSEPECPGNCHLR	0.9999	GPNCSEPECPGNCHLR	TENA_HUMAN	GPNCSEPECPGNCHLR	G
LLETVEYN[115]ISGAER	0.9999	LLETVEYNISGAER	TENA_HUMAN	LLETVEYNISGAER	T
LN[115]WTAADQAYEHFIIQVQEANK	0.9999	LNWTAADQAYEHFIIQVQEANK	TENA_HUMAN	LNWTAADQAYEHFIIQVQEANK	V
LN[115]YSLPTGQWVGVQLPR	0.9999	LNYSLPTGQWVGVQLPR	TENA_HUMAN	LNYSLPTGQWVGVQLPR	N
VEAAQN[115]LTLPGSLR	0.9999	VEAAQNLTLPGSLR	TENA_HUMAN	VEAAQNLTLPGSLR	A
GFEESEPVSGSFTTALDGPSGLVTAN[115]ITDSEALAR	0.9999	GFEESEPVSGSFTTALDGPSGLVTANITDSEALAR	TENA_HUMAN	GFEESEPVSGSFTTALDGPSGLVTANITDSEALAR	W
LN[115]WTAADNAYEHFVIQVQEVNK	0.9999	LNWTAADNAYEHFVIQVQEVNK	TENA_HUMAN	LNWTAADNAYEHFVIQVQEVNK	V
LN[115]WTTPDGTYDQFTIQVQEADQVEEAHN[115]LTVPGSLR	0.9999	LNWTTPDGTYDQFTIQVQEADQVEEAHNLTVPGSLR	TENA_HUMAN	LNWTTPDGTYDQFTIQVQEADQVEEAHNLTVPGSLR	S
QDQCIYN[115]TTYLNVQR	0.9999	QDQCIYNTTYLNVQR	A1AG1_HUMAN	QDQCIYNTTYLNVQR	E
IHYLYLQNNFITELPVESFQN[115]ATGLR	0.9999	IHYLYLQNNFITELPVESFQNATGLR	PRELP_HUMAN	IHYLYLQNNFITELPVESFQNATGLR	W
NSFN[115]ISNLLVLHLSHNR	0.9999	NSFNISNLLVLHLSHNR	PRELP_HUMAN	NSFNISNLLVLHLSHNR	I
IN[115]GTQICPNDLVAFHDFSSDLENVPHLR	0.9999	INGTQICPNDLVAFHDFSSDLENVPHLR	PRELP_HUMAN	INGTQICPNDLVAFHDFSSDLENVPHLR	Y
AEPPLN[115]ASASDQGEK	0.9999	AEPPLNASASDQGEK	HYOU1_HUMAN	AEPPLNASASDQGEK	V
EN[115]GTDTVQEEEESPAEGSK	0.9999	ENGTDTVQEEEESPAEGSK	HYOU1_HUMAN	ENGTDTVQEEEESPAEGSK	D
LSALDNLLN[115]HSSMFLK	0.9999	LSALDNLLNHSSMFLK	HYOU1_HUMAN	LSALDNLLNHSSMFLK	G
LSALDNLLN[115]HSSM[147]FLK	0.9999	LSALDNLLNHSSMFLK	HYOU1_HUMAN	LSALDNLLNHSSMFLK	G
VFGSQN[115]LTTVK	0.9999	VFGSQNLTTVK	HYOU1_HUMAN	VFGSQNLTTVK	L
VIN[115]ETWAWK	0.9999	VINETWAWK	HYOU1_HUMAN	VINETWAWK	N
QNQCFYN[115]SSYLNVQR	0.9999	QNQCFYNSSYLNVQR	A1AG2_HUMAN	QNQCFYNSSYLNVQR	E
AN[115]DTSYIR	0.9999	ANDTSYIR	MIME_HUMAN	ANDTSYIR	D
LNN[115]LTFLYLDHNALESVPLNLPESLR	0.9999	LNNLTFLYLDHNALESVPLNLPESLR	MIME_HUMAN	LNNLTFLYLDHNALESVPLNLPESLR	V
IAVQFGPGFSWIAN[115]FTK	0.9999	IAVQFGPGFSWIANFTK	LAMP2_HUMAN	IAVQFGPGFSWIANFTK	A
VASVININPN[115]TTHSTGSCR	0.9999	VASVININPNTTHSTGSCR	LAMP2_HUMAN	VASVININPNTTHSTGSCR	S
WQM[147]N[115]FTVR	0.9999	WQMNFTVR	LAMP2_HUMAN	WQMNFTVR	Y
AASTYSIDSVSFSYNTGDN[115]TTFPDAEDK	0.9999	AASTYSIDSVSFSYNTGDNTTFPDAEDK	LAMP2_HUMAN	AASTYSIDSVSFSYNTGDNTTFPDAEDK	G
TVTISDHGTVTYN[115]GSICGDDQNGPK	0.9999	TVTISDHGTVTYNGSICGDDQNGPK	LAMP2_HUMAN	TVTISDHGTVTYNGSICGDDQNGPK	I
GCSSSTSVLLTLDNNVVN[115]GSSPAIR	0.9999	GCSSSTSVLLTLDNNVVNGSSPAIR	TSP1_HUMAN	GCSSSTSVLLTLDNNVVNGSSPAIR	T
VSCPIMPCSN[115]ATVPDGECCPR	0.9999	VSCPIMPCSNATVPDGECCPR	TSP1_HUMAN	VSCPIMPCSNATVPDGECCPR	C
VSCPIM[147]PCSN[115]ATVPDGECCPR	0.9999	VSCPIMPCSNATVPDGECCPR	TSP1_HUMAN	VSCPIMPCSNATVPDGECCPR	C
VVN[115]STTGPGEHLR	0.9999	VVNSTTGPGEHLR	TSP1_HUMAN	VVNSTTGPGEHLR	N
LLNN[115]LTSIK	0.9999	LLNNLTSIK	LAMC1_HUMAN	LLNNLTSIK	I
IPAIN[115]QTITEANEK	0.9999	IPAINQTITEANEK	LAMC1_HUMAN	IPAINQTITEANEK	T
TAN[115]DTSTEAYNLLLR	0.9999	TANDTSTEAYNLLLR	LAMC1_HUMAN	TANDTSTEAYNLLLR	T
TLAGEN[115]QTAFEIEELNR	0.9999	TLAGENQTAFEIEELNR	LAMC1_HUMAN	TLAGENQTAFEIEELNR	K
VN[115]NTLSSQISR	0.9999	VNNTLSSQISR	LAMC1_HUMAN	VNNTLSSQISR	L
AIIQGLMPDQN[115]YTVQIIAYNK	0.9999	AIIQGLMPDQNYTVQIIAYNK	COEA1_HUMAN	AIIQGLMPDQNYTVQIIAYNK	D
AIIQGLM[147]PDQN[115]YTVQIIAYNK	0.9999	AIIQGLMPDQNYTVQIIAYNK	COEA1_HUMAN	AIIQGLMPDQNYTVQIIAYNK	D
AMNASAN[115]ITSDGVEVLGK	0.9999	AMNASANITSDGVEVLGK	COEA1_HUMAN	AMNASANITSDGVEVLGK	M
AMN[115]ASANITSDGVEVLGK	0.9999	AMNASANITSDGVEVLGK	COEA1_HUMAN	AMNASANITSDGVEVLGK	M
AMN[115]ASAN[115]ITSDGVEVLGK	0.9999	AMNASANITSDGVEVLGK	COEA1_HUMAN	AMNASANITSDGVEVLGK	M
AM[147]NASAN[115]ITSDGVEVLGK	0.9999	AMNASANITSDGVEVLGK	COEA1_HUMAN	AMNASANITSDGVEVLGK	M
AM[147]N[115]ASANITSDGVEVLGK	0.9999	AMNASANITSDGVEVLGK	COEA1_HUMAN	AMNASANITSDGVEVLGK	M
AM[147]N[115]ASAN[115]ITSDGVEVLGK	0.9999	AMNASANITSDGVEVLGK	COEA1_HUMAN	AMNASANITSDGVEVLGK	M
SFMVN[115]WTHAPGNVEK	0.9999	SFMVNWTHAPGNVEK	COEA1_HUMAN	SFMVNWTHAPGNVEK	Y
SFM[147]VN[115]WTHAPGNVEK	0.9999	SFMVNWTHAPGNVEK	COEA1_HUMAN	SFMVNWTHAPGNVEK	Y
ETN[115]TTSQMQAALLEK	0.9999	ETNTTSQMQAALLEK	EMIL1_HUMAN	ETNTTSQMQAALLEK	L
ETN[115]TTSQM[147]QAALLEK	0.9999	ETNTTSQMQAALLEK	EMIL1_HUMAN	ETNTTSQMQAALLEK	L
LEQLGGLLAN[115]VSGELGGR	0.9999	LEQLGGLLANVSGELGGR	EMIL1_HUMAN	LEQLGGLLANVSGELGGR	L
LGALN[115]SSLQLLEDR	0.9999	LGALNSSLQLLEDR	EMIL1_HUMAN	LGALNSSLQLLEDR	L
FN[115]STLGPSEEQEESWPGAPGGLSHWLPAAR	0.9999	FNSTLGPSEEQEESWPGAPGGLSHWLPAAR	EMIL1_HUMAN	FNSTLGPSEEQEESWPGAPGGLSHWLPAAR	G
FGTCSQLCN[115]NTK	0.9999	FGTCSQLCNNTK	LRP1_HUMAN	FGTCSQLCNNTK	G
FN[115]STEYQVVTR	0.9999	FNSTEYQVVTR	LRP1_HUMAN	FNSTEYQVVTR	V
GVTHLN[115]ISGLK	0.9999	GVTHLNISGLK	LRP1_HUMAN	GVTHLNISGLK	M
LNLDGSN[115]YTLLK	0.9999	LNLDGSNYTLLK	LRP1_HUMAN	LNLDGSNYTLLK	Q
LTSCATN[115]ASICGDEAR	0.9999	LTSCATNASICGDEAR	LRP1_HUMAN	LTSCATNASICGDEAR	C
LYWISSGN[115]HTINR	0.9999	LYWISSGNHTINR	LRP1_HUMAN	LYWISSGNHTINR	C
LYWTDGDN[115]ISM[147]ANM[147]DGSN[115]R	0.9999	LYWTDGDNISMANMDGSNR	LRP1_HUMAN	LYWTDGDNISMANMDGSNR	T
TCVSN[115]CTASQFVCK	0.9999	TCVSNCTASQFVCK	LRP1_HUMAN	TCVSNCTASQFVCK	N
WTGHN[115]VTVVQR	0.9999	WTGHNVTVVQR	LRP1_HUMAN	WTGHNVTVVQR	T
AFIN[115]GTGVETVVSADLPNAHGLAVDWVSR	0.9999	AFINGTGVETVVSADLPNAHGLAVDWVSR	LRP1_HUMAN	AFINGTGVETVVSADLPNAHGLAVDWVSR	N
LGCQHHCVPTLDGPTCYCN[115]SSFQLQADGK	0.9999	LGCQHHCVPTLDGPTCYCNSSFQLQADGK	LRP1_HUMAN	LGCQHHCVPTLDGPTCYCNSSFQLQADGK	T
INNGGCQDLCLLTHQGHVN[115]CSCR	0.9999	INNGGCQDLCLLTHQGHVNCSCR	LRP1_HUMAN	INNGGCQDLCLLTHQGHVNCSCR	G
M[147]HLN[115]GSNVQVLHR	0.9999	MHLNGSNVQVLHR	LRP1_HUMAN	MHLNGSNVQVLHR	T
VDIPQQPM[147]GIIAVAN[115]DTNSCELSPCR	0.9999	VDIPQQPMGIIAVANDTNSCELSPCR	LRP1_HUMAN	VDIPQQPMGIIAVANDTNSCELSPCR	I
FGHSPLVN[115]LTGGLSHASDVVLYHQHK	0.9999	FGHSPLVNLTGGLSHASDVVLYHQHK	LRP1_HUMAN	FGHSPLVNLTGGLSHASDVVLYHQHK	Q
LGACN[115]DTLQQLMEVFK	0.9999	LGACNDTLQQLMEVFK	ANT3_HUMAN	LGACNDTLQQLMEVFK	F
LGACN[115]DTLQQLM[147]EVFK	0.9999	LGACNDTLQQLMEVFK	ANT3_HUMAN	LGACNDTLQQLMEVFK	F
SLTFN[115]ETYQDISELVYGAK	0.9999	SLTFNETYQDISELVYGAK	ANT3_HUMAN	SLTFNETYQDISELVYGAK	L
EN[115]ISDPTSPLR	0.9999	ENISDPTSPLR	IGJ_HUMAN	ENISDPTSPLR	T
EAGN[115]ITTDGYEILGK	0.9999	EAGNITTDGYEILGK	COCA1_HUMAN	EAGNITTDGYEILGK	L
MLEAYN[115]LTEK	0.9999	MLEAYNLTEK	COCA1_HUMAN	MLEAYNLTEK	N
M[147]LEAYN[115]LTEK	0.9999	MLEAYNLTEK	COCA1_HUMAN	MLEAYNLTEK	N
NLQVYN[115]ATSNSLTVK	0.9999	NLQVYNATSNSLTVK	COCA1_HUMAN	NLQVYNATSNSLTVK	W
AN[115]LSSQALQM[147]SLDYGFVTPLTSM[147]SIR	0.9999	ANLSSQALQMSLDYGFVTPLTSMSIR	ITIH1_HUMAN	ANLSSQALQMSLDYGFVTPLTSMSIR	G
AN[115]LSSQALQMSLDYGFVTPLTSM[147]SIR	0.9999	ANLSSQALQMSLDYGFVTPLTSMSIR	ITIH1_HUMAN	ANLSSQALQMSLDYGFVTPLTSMSIR	G
AN[115]LSSQALQM[147]SLDYGFVTPLTSMSIR	0.9999	ANLSSQALQMSLDYGFVTPLTSMSIR	ITIH1_HUMAN	ANLSSQALQMSLDYGFVTPLTSMSIR	G
ICDLLVANNHFAHFFAPQN[115]LTNMNK	0.9999	ICDLLVANNHFAHFFAPQNLTNMNK	ITIH1_HUMAN	ICDLLVANNHFAHFFAPQNLTNMNK	N
ICDLLVANNHFAHFFAPQN[115]LTNM[147]NK	0.9999	ICDLLVANNHFAHFFAPQNLTNMNK	ITIH1_HUMAN	ICDLLVANNHFAHFFAPQNLTNMNK	N
N[115]FTAADWGQSR	0.9999	NFTAADWGQSR	CO6A1_HUMAN	NFTAADWGQSR	D
GHHN[115]CSESLELEDPSSGLGVTK	0.9999	GHHNCSESLELEDPSSGLGVTK	HG2A_HUMAN	GHHNCSESLELEDPSSGLGVTK	Q
M[147]ATPLLM[147]QALPM[147]GALPQGPM[147]QN[115]ATK	0.9999	MATPLLMQALPMGALPQGPMQNATK	HG2A_HUMAN	MATPLLMQALPMGALPQGPMQNATK	Y
M[147]ATPLLMQALPM[147]GALPQGPM[147]QN[115]ATK	0.9999	MATPLLMQALPMGALPQGPMQNATK	HG2A_HUMAN	MATPLLMQALPMGALPQGPMQNATK	Y
YGN[115]MTEDHVM[147]HLLQNADPLK	0.9999	YGNMTEDHVMHLLQNADPLK	HG2A_HUMAN	YGNMTEDHVMHLLQNADPLK	V
DTCTQECSYFN[115]ITK	0.9999	DTCTQECSYFNITK	ITB1_HUMAN	DTCTQECSYFNITK	V
NPCTSEQN[115]CTSPFSYK	0.9999	NPCTSEQNCTSPFSYK	ITB1_HUMAN	NPCTSEQNCTSPFSYK	N
AQLLQGLGFN[115]LTER	0.9999	AQLLQGLGFNLTER	CBG_HUMAN	AQLLQGLGFNLTER	S
AVLQLNEEGVDTAGSTGVTLN[115]LTSKPIILR	0.9999	AVLQLNEEGVDTAGSTGVTLNLTSKPIILR	CBG_HUMAN	AVLQLNEEGVDTAGSTGVTLNLTSKPIILR	F
ITDIEN[115]GSLANIPR	0.9999	ITDIENGSLANIPR	ASPN_HUMAN	ITDIENGSLANIPR	V
FN[115]GSVSFFR	0.9999	FNGSVSFFR	MFAP4_HUMAN	FNGSVSFFR	G
VDLEDFEN[115]NTAYAK	0.9999	VDLEDFENNTAYAK	MFAP4_HUMAN	VDLEDFENNTAYAK	Y
LYLDHNN[115]LTR	0.9999	LYLDHNNLTR	FMOD_HUMAN	LYLDHNNLTR	M
VPNNALEGLEN[115]LTALYLQHNEIQEVGSSMR	0.9999	VPNNALEGLENLTALYLQHNEIQEVGSSMR	FMOD_HUMAN	VPNNALEGLENLTALYLQHNEIQEVGSSMR	G
VPNNALEGLEN[115]LTALYLQHNEIQEVGSSM[147]R	0.9999	VPNNALEGLENLTALYLQHNEIQEVGSSMR	FMOD_HUMAN	VPNNALEGLENLTALYLQHNEIQEVGSSMR	G
EN[115]TSDPSLVIAFGR	0.9999	ENTSDPSLVIAFGR	LAMP1_HUMAN	ENTSDPSLVIAFGR	G
GHTLTLN[115]FTR	0.9999	GHTLTLNFTR	LAMP1_HUMAN	GHTLTLNFTR	N
YSVQLM[147]SFVYN[115]LSDTHLFPN[115]ASSK	0.9999	YSVQLMSFVYNLSDTHLFPNASSK	LAMP1_HUMAN	YSVQLMSFVYNLSDTHLFPNASSK	E
CVSGTQVHMNNVTVTLHDATIQAYLSN[115]SSFSR	0.9999	CVSGTQVHMNNVTVTLHDATIQAYLSNSSFSR	LAMP1_HUMAN	CVSGTQVHMNNVTVTLHDATIQAYLSNSSFSR	G
CVSGTQVHM[147]NNVTVTLHDATIQAYLSN[115]SSFSR	0.9999	CVSGTQVHMNNVTVTLHDATIQAYLSNSSFSR	LAMP1_HUMAN	CVSGTQVHMNNVTVTLHDATIQAYLSNSSFSR	G
YSVQLMSFVYN[115]LSDTHLFPN[115]ASSK	0.9999	YSVQLMSFVYNLSDTHLFPNASSK	LAMP1_HUMAN	YSVQLMSFVYNLSDTHLFPNASSK	E
YSVQLM[147]SFVYNLSDTHLFPN[115]ASSK	0.9999	YSVQLMSFVYNLSDTHLFPNASSK	LAMP1_HUMAN	YSVQLMSFVYNLSDTHLFPNASSK	E
VSVNTAN[115]VTLGPQLM[147]EVTVYR	0.9999	VSVNTANVTLGPQLMEVTVYR	GPNMB_HUMAN	VSVNTANVTLGPQLMEVTVYR	R
DLPIM[147]FDVLIHDPSHFLN[115]YSTINYK	0.9999	DLPIMFDVLIHDPSHFLNYSTINYK	GPNMB_HUMAN	DLPIMFDVLIHDPSHFLNYSTINYK	W
LN[115]FTGPGDPDSIR	0.9999	LNFTGPGDPDSIR	ITB2_HUMAN	LNFTGPGDPDSIR	C
LTN[115]NSNQFQTEVGK	0.9999	LTNNSNQFQTEVGK	ITB2_HUMAN	LTNNSNQFQTEVGK	Q
PGQAAAFN[115]VTFR	0.9999	PGQAAAFNVTFR	ITB2_HUMAN	PGQAAAFNVTFR	R
VYIHPFHLVIHN[115]ESTCEQLAK	0.9999	VYIHPFHLVIHNESTCEQLAK	ANGT_HUMAN	VYIHPFHLVIHNESTCEQLAK	A
QQQHLFGSN[115]VTDCSGNFCLFR	0.9999	QQQHLFGSNVTDCSGNFCLFR	TRFE_HUMAN	QQQHLFGSNVTDCSGNFCLFR	S
LNAENN[115]ATFYFK	0.9999	LNAENNATFYFK	KNG1_HUMAN	LNAENNATFYFK	I
ITYSIVQTN[115]CSK	0.9999	ITYSIVQTNCSK	KNG1_HUMAN	ITYSIVQTNCSK	E
YNSQN[115]QSNNQFVLYR	0.9999	YNSQNQSNNQFVLYR	KNG1_HUMAN	YNSQNQSNNQFVLYR	I
HGIQYFNN[115]NTQHSSLFM[147]LNEVKR	0.9999	HGIQYFNNNTQHSSLFMLNEVKR	KNG1_HUMAN	HGIQYFNNNTQHSSLFMLNEVKR	A
HGIQYFNN[115]NTQHSSLFMLNEVKR	0.9999	HGIQYFNNNTQHSSLFMLNEVKR	KNG1_HUMAN	HGIQYFNNNTQHSSLFMLNEVKR	A
ILLTCSLN[115]DSATEVTGHR	0.9999	ILLTCSLNDSATEVTGHR	BASI_HUMAN	ILLTCSLNDSATEVTGHR	W
IAPASN[115]VSHTVVLR	0.9999	IAPASNVSHTVVLR	SSRB_HUMAN	IAPASNVSHTVVLR	P
AGYFN[115]FTSATITYLAQEDGPVVIGSTSAPGQGGILAQR	0.9999	AGYFNFTSATITYLAQEDGPVVIGSTSAPGQGGILAQR	SSRB_HUMAN	AGYFNFTSATITYLAQEDGPVVIGSTSAPGQGGILAQR	E
DIENFN[115]STQK	0.9999	DIENFNSTQK	AFAM_HUMAN	DIENFNSTQK	F
HN[115]FSHCCSK	0.9999	HNFSHCCSK	AFAM_HUMAN	HNFSHCCSK	V
HM[147]PWN[115]ITR	0.9999	HMPWNITR	SFRP4_HUMAN	HMPWNITR	M
M[147]YN[115]HSWPESLACDELPVYDR	0.9999	MYNHSWPESLACDELPVYDR	SFRP4_HUMAN	MYNHSWPESLACDELPVYDR	G
MYN[115]HSWPESLACDELPVYDR	0.9999	MYNHSWPESLACDELPVYDR	SFRP4_HUMAN	MYNHSWPESLACDELPVYDR	G
APGWAN[115]SSAGSGR	0.9999	APGWANSSAGSGR	C163A_HUMAN	APGWANSSAGSGR	I
EDAAVN[115]CTDISVQK	0.9999	EDAAVNCTDISVQK	C163A_HUMAN	EDAAVNCTDISVQK	T
GN[115]ESALWDCK	0.9999	GNESALWDCK	C163A_HUMAN	GNESALWDCK	H
GN[115]ESSLWDCPAR	0.9999	GNESSLWDCPAR	C163A_HUMAN	GNESSLWDCPAR	R
HSN[115]CTHQQDAGVTCSDGSNLEM[147]R	0.9999	HSNCTHQQDAGVTCSDGSNLEMR	C163A_HUMAN	HSNCTHQQDAGVTCSDGSNLEMR	L
LEWLGN[115]CSGLNDETYGYK	0.9999	LEWLGNCSGLNDETYGYK	AT1B1_HUMAN	LEWLGNCSGLNDETYGYK	E
YLQPLLAVQFTN[115]LTM[147]DTEIR	0.9999	YLQPLLAVQFTNLTMDTEIR	AT1B1_HUMAN	YLQPLLAVQFTNLTMDTEIR	I
ESVTDHVNLITPLEKPLQN[115]FTLCFR	0.9999	ESVTDHVNLITPLEKPLQNFTLCFR	SAMP_HUMAN	ESVTDHVNLITPLEKPLQNFTLCFR	A
LGDCISEDSYPDGN[115]ITWYR	0.9999	LGDCISEDSYPDGNITWYR	CD166_HUMAN	LGDCISEDSYPDGNITWYR	N
IIISPEEN[115]VTLTCTAENQLER	0.9999	IIISPEENVTLTCTAENQLER	CD166_HUMAN	IIISPEENVTLTCTAENQLER	T
LNLSEN[115]YTLSISNAR	0.9999	LNLSENYTLSISNAR	CD166_HUMAN	LNLSENYTLSISNAR	I
LSLLEEPGN[115]GTFTVILNQLTSR	0.9999	LSLLEEPGNGTFTVILNQLTSR	PIGR_HUMAN	LSLLEEPGNGTFTVILNQLTSR	D
VPGN[115]VTAVLGETLK	0.9999	VPGNVTAVLGETLK	PIGR_HUMAN	VPGNVTAVLGETLK	V
WN[115]NTGCQALPSQDEGPSK	0.9999	WNNTGCQALPSQDEGPSK	PIGR_HUMAN	WNNTGCQALPSQDEGPSK	A
AN[115]LTNFPEN[115]GTFVVNIAQLSQDDSGR	0.9999	ANLTNFPENGTFVVNIAQLSQDDSGR	PIGR_HUMAN	ANLTNFPENGTFVVNIAQLSQDDSGR	Y
FEVDSPVYN[115]ATWSASLK	0.9999	FEVDSPVYNATWSASLK	APOB_HUMAN	FEVDSPVYNATWSASLK	N
FN[115]SSYLQGTNQITGR	0.9999	FNSSYLQGTNQITGR	APOB_HUMAN	FNSSYLQGTNQITGR	Y
FVEGSHN[115]STVSLTTK	0.9999	FVEGSHNSTVSLTTK	APOB_HUMAN	FVEGSHNSTVSLTTK	N
VNQNLVYESGSLN[115]FSK	0.9999	VNQNLVYESGSLNFSK	APOB_HUMAN	VNQNLVYESGSLNFSK	L
YDFN[115]SSM[147]LYSTAK	0.9999	YDFNSSMLYSTAK	APOB_HUMAN	YDFNSSMLYSTAK	G
NDAGSYECEIQNPASAN[115]R	0.9999	NDAGSYECEIQNPASANR	CEAM6_HUMAN	NDAGSYECEIQNPASANR	S
FTPPVVN[115]VTWLR	0.9999	FTPPVVNVTWLR	DRA_HUMAN	FTPPVVNVTWLR	N
LLANYASQN[115]ITYHCK	0.9999	LLANYASQNITYHCK	CO1A2_HUMAN	LLANYASQNITYHCK	N
GLTFQQN[115]ASSMCVPDQDTAIR	0.9999	GLTFQQNASSMCVPDQDTAIR	IGHM_HUMAN	GLTFQQNASSMCVPDQDTAIR	V
GLTFQQN[115]ASSM[147]CVPDQDTAIR	0.9999	GLTFQQNASSMCVPDQDTAIR	IGHM_HUMAN	GLTFQQNASSMCVPDQDTAIR	V
THTN[115]ISESHPN[115]ATFSAVGEASICEDDWNSGER	0.9999	THTNISESHPNATFSAVGEASICEDDWNSGER	IGHM_HUMAN	THTNISESHPNATFSAVGEASICEDDWNSGER	F
IQMLSFAGEPLPQN[115]SSMAR	0.9999	IQMLSFAGEPLPQNSSMAR	AOC3_HUMAN	IQMLSFAGEPLPQNSSMAR	G
IQMLSFAGEPLPQN[115]SSM[147]AR	0.9999	IQMLSFAGEPLPQNSSMAR	AOC3_HUMAN	IQMLSFAGEPLPQNSSMAR	G
IQM[147]LSFAGEPLPQN[115]SSMAR	0.9999	IQMLSFAGEPLPQNSSMAR	AOC3_HUMAN	IQMLSFAGEPLPQNSSMAR	G
IQM[147]LSFAGEPLPQN[115]SSM[147]AR	0.9999	IQMLSFAGEPLPQNSSMAR	AOC3_HUMAN	IQMLSFAGEPLPQNSSMAR	G
YLYLASN[115]HSNK	0.9999	YLYLASNHSNK	AOC3_HUMAN	YLYLASNHSNK	W
ASPPSSSCN[115]ISSGEMQK	0.9999	ASPPSSSCNISSGEMQK	VWF_HUMAN	ASPPSSSCNISSGEMQK	G
ASPPSSSCN[115]ISSGEM[147]QK	0.9999	ASPPSSSCNISSGEMQK	VWF_HUMAN	ASPPSSSCNISSGEMQK	G
GQVYLQCGTPCN[115]LTCR	0.9999	GQVYLQCGTPCNLTCR	VWF_HUMAN	GQVYLQCGTPCNLTCR	S
M[147]EACM[147]LN[115]GTVIGPGK	0.9999	MEACMLNGTVIGPGK	VWF_HUMAN	MEACMLNGTVIGPGK	T
HCDGN[115]VSSCGDHPSEGCFCPPDK	0.9999	HCDGNVSSCGDHPSEGCFCPPDK	VWF_HUMAN	HCDGNVSSCGDHPSEGCFCPPDK	V
GVVTDEQGIPIAN[115]ATISVSGINHGVK	0.9999	GVVTDEQGIPIANATISVSGINHGVK	AEBP1_HUMAN	GVVTDEQGIPIANATISVSGINHGVK	T
IYPLTWN[115]GSLCMR	0.9999	IYPLTWNGSLCMR	AEBP1_HUMAN	IYPLTWNGSLCMR	L
IYPLTWN[115]GSLCM[147]R	0.9999	IYPLTWNGSLCMR	AEBP1_HUMAN	IYPLTWNGSLCMR	L
TPLTAN[115]ITK	0.9999	TPLTANITK	IGHA2_HUMAN	TPLTANITK	S
HEN[115]TSSSPIQYEFSLTR	0.9999	HENTSSSPIQYEFSLTR	THY1_HUMAN	HENTSSSPIQYEFSLTR	E
DEGTYTCALHHSGHSPPISSQN[115]VTVLR	0.9999	DEGTYTCALHHSGHSPPISSQNVTVLR	THY1_HUMAN	DEGTYTCALHHSGHSPPISSQNVTVLR	D
GTAGNALMDGASQLMGEN[115]R	0.9999	GTAGNALMDGASQLMGENR	FIBB_HUMAN	GTAGNALMDGASQLMGENR	T
GTAGNALMDGASQLM[147]GEN[115]R	0.9999	GTAGNALMDGASQLMGENR	FIBB_HUMAN	GTAGNALMDGASQLMGENR	T
GTAGNALM[147]DGASQLMGEN[115]R	0.9999	GTAGNALMDGASQLMGENR	FIBB_HUMAN	GTAGNALMDGASQLMGENR	T
GTAGNALM[147]DGASQLM[147]GEN[115]R	0.9999	GTAGNALMDGASQLMGENR	FIBB_HUMAN	GTAGNALMDGASQLMGENR	T
DDAGN[115]YTCIASNGPQGQIR	0.9999	DDAGNYTCIASNGPQGQIR	PTK7_HUMAN	DDAGNYTCIASNGPQGQIR	A
DGTPLSDGQSN[115]HTVSSK	0.9999	DGTPLSDGQSNHTVSSK	PTK7_HUMAN	DGTPLSDGQSNHTVSSK	E
M[147]HIFQN[115]GSLVIHDVAPEDSGR	0.9999	MHIFQNGSLVIHDVAPEDSGR	PTK7_HUMAN	MHIFQNGSLVIHDVAPEDSGR	Y
AN[115]TTQPGIVEGGQVLK	0.9999	ANTTQPGIVEGGQVLK	ITAV_HUMAN	ANTTQPGIVEGGQVLK	C
TAADTTGLQPILNQFTPAN[115]ISR	0.9999	TAADTTGLQPILNQFTPANISR	ITAV_HUMAN	TAADTTGLQPILNQFTPANISR	Q
PGACTN[115]ITM[147]GVVCK	0.9999	PGACTNITMGVVCK	MRC2_HUMAN	PGACTNITMGVVCK	L
VTPACN[115]TSLPAQR	0.9999	VTPACNTSLPAQR	MRC2_HUMAN	VTPACNTSLPAQR	W
WNDSPCN[115]QSLPSICK	0.9999	WNDSPCNQSLPSICK	MRC2_HUMAN	WNDSPCNQSLPSICK	K
WN[115]DSPCN[115]QSLPSICK	0.9999	WNDSPCNQSLPSICK	MRC2_HUMAN	WNDSPCNQSLPSICK	K
GTDPSLSPSPAALPPAPGTELSYLN[115]GTFR	0.9999	GTDPSLSPSPAALPPAPGTELSYLNGTFR	MRC2_HUMAN	GTDPSLSPSPAALPPAPGTELSYLNGTFR	L
NN[115]HTASILDR	0.9999	NNHTASILDR	CD63_HUMAN	NNHTASILDR	M
VPDSCCIN[115]VTVGCGINFNEK	0.9999	VPDSCCINVTVGCGINFNEK	CD63_HUMAN	VPDSCCINVTVGCGINFNEK	A
LPPGLLAN[115]FTLLR	0.9999	LPPGLLANFTLLR	A2GL_HUMAN	LPPGLLANFTLLR	T
MFSQN[115]DTR	0.9999	MFSQNDTR	A2GL_HUMAN	MFSQNDTR	C
M[147]FSQN[115]DTR	0.9999	MFSQNDTR	A2GL_HUMAN	MFSQNDTR	C
AQQLLAN[115]STALEEAM[147]LQEQQR	0.9999	AQQLLANSTALEEAMLQEQQR	LAMA5_HUMAN	AQQLLANSTALEEAMLQEQQR	L
DN[115]ATLQATLHAAR	0.9999	DNATLQATLHAAR	LAMA5_HUMAN	DNATLQATLHAAR	D
GIN[115]ASSMAWAR	0.9999	GINASSMAWAR	LAMA5_HUMAN	GINASSMAWAR	L
GIN[115]ASSM[147]AWAR	0.9999	GINASSMAWAR	LAMA5_HUMAN	GINASSMAWAR	L
GVHN[115]ASLALSASIGR	0.9999	GVHNASLALSASIGR	LAMA5_HUMAN	GVHNASLALSASIGR	V
LN[115]ASIADLQSQLR	0.9999	LNASIADLQSQLR	LAMA5_HUMAN	LNASIADLQSQLR	S
LN[115]TTGVSAGCTADLLVGR	0.9999	LNTTGVSAGCTADLLVGR	LAMA5_HUMAN	LNTTGVSAGCTADLLVGR	A
VFDLQQNLGSVN[115]VSTGCAPALQAQTPGLGPR	0.9999	VFDLQQNLGSVNVSTGCAPALQAQTPGLGPR	LAMA5_HUMAN	VFDLQQNLGSVNVSTGCAPALQAQTPGLGPR	G
VWQGHAN[115]ASFCPHGYGCR	0.9999	VWQGHANASFCPHGYGCR	LAMA5_HUMAN	VWQGHANASFCPHGYGCR	T
GN[115]LTYGYVTILN[115]GSDIR	0.9999	GNLTYGYVTILNGSDIR	ITA5_HUMAN	GNLTYGYVTILNGSDIR	S
NLN[115]NSQSDVVSFR	0.9999	NLNNSQSDVVSFR	ITA5_HUMAN	NLNNSQSDVVSFR	L
VTGLN[115]CTTNHPINPK	0.9999	VTGLNCTTNHPINPK	ITA5_HUMAN	VTGLNCTTNHPINPK	G
HPGN[115]FSSLSCDYFAVN[115]QSR	0.9999	HPGNFSSLSCDYFAVNQSR	ITA5_HUMAN	HPGNFSSLSCDYFAVNQSR	L
AEFN[115]ITLIHPK	0.9999	AEFNITLIHPK	AMPN_HUMAN	AEFNITLIHPK	D
GPSTPLPEDPNWN[115]VTEFHTTPK	0.9999	GPSTPLPEDPNWNVTEFHTTPK	AMPN_HUMAN	GPSTPLPEDPNWNVTEFHTTPK	M
VPVTLALN[115]NTLFLIEER	0.9999	VPVTLALNNTLFLIEER	AMPN_HUMAN	VPVTLALNNTLFLIEER	Q
NIETFTCDTQN[115]ITYR	0.9999	NIETFTCDTQNITYR	PTPRC_HUMAN	NIETFTCDTQNITYR	F
YAN[115]ITVDYLYNK	0.9999	YANITVDYLYNK	PTPRC_HUMAN	YANITVDYLYNK	E
FFAEN[115]ETWVVDSCTTCTCK	0.9999	FFAENETWVVDSCTTCTCK	TSP2_HUMAN	FFAENETWVVDSCTTCTCK	K
VVN[115]STTGTGEHLR	0.9999	VVNSTTGTGEHLR	TSP2_HUMAN	VVNSTTGTGEHLR	N
VVN[115]VSDLYK	0.9999	VVNVSDLYK	ENTP1_HUMAN	VVNVSDLYK	T
YHYN[115]GTFEDGK	0.9999	YHYNGTFEDGK	FKB10_HUMAN	YHYNGTFEDGK	K
YHYN[115]CSLLDGTQLFTSHDYGAPQEATLGANK	0.9999	YHYNCSLLDGTQLFTSHDYGAPQEATLGANK	FKB10_HUMAN	YHYNCSLLDGTQLFTSHDYGAPQEATLGANK	V
DLGPTLAN[115]STHHNVR	0.9999	DLGPTLANSTHHNVR	GLCM_HUMAN	DLGPTLANSTHHNVR	L
M[147]ELSM[147]GPIQAN[115]HTGTGLLLTLQPEQK	0.9999	MELSMGPIQANHTGTGLLLTLQPEQK	GLCM_HUMAN	MELSMGPIQANHTGTGLLLTLQPEQK	F
LSAVNSIFLSHN[115]NTK	0.9999	LSAVNSIFLSHNNTK	CD97_HUMAN	LSAVNSIFLSHNNTK	E
WCPQNSSCVN[115]ATACR	0.9999	WCPQNSSCVNATACR	CD97_HUMAN	WCPQNSSCVNATACR	C
WCPQN[115]SSCVN[115]ATACR	0.9999	WCPQNSSCVNATACR	CD97_HUMAN	WCPQNSSCVNATACR	C
NLHQSN[115]TSR	0.9999	NLHQSNTSR	PGBM_HUMAN	NLHQSNTSR	A
GVN[115]VTM[147]PAQPGTPPLSSTQLQIDPSLHEFQLVDLSR	0.9999	GVNVTMPAQPGTPPLSSTQLQIDPSLHEFQLVDLSR	PGBM_HUMAN	GVNVTMPAQPGTPPLSSTQLQIDPSLHEFQLVDLSR	R
IQGEEIVFHDLN[115]LTAHGISHCPTCR	0.9999	IQGEEIVFHDLNLTAHGISHCPTCR	PGBM_HUMAN	IQGEEIVFHDLNLTAHGISHCPTCR	D
NN[115]ATVHEQVGGPSLTSDLQAQSK	0.9999	NNATVHEQVGGPSLTSDLQAQSK	VTNC_HUMAN	NNATVHEQVGGPSLTSDLQAQSK	G
AFGQFFSPGEVIYN[115]K	0.9999	AFGQFFSPGEVIYNK	MUC5B_HUMAN	AFGQFFSPGEVIYNK	T
ATN[115]STATPSSTLGTTR	0.9999	ATNSTATPSSTLGTTR	MUC5B_HUMAN	ATNSTATPSSTLGTTR	I
DIECQAESFPN[115]WTLAQVGQK	0.9999	DIECQAESFPNWTLAQVGQK	MUC5B_HUMAN	DIECQAESFPNWTLAQVGQK	V
QVN[115]ETWTLEN[115]CTVAR	0.9999	QVNETWTLENCTVAR	MUC5B_HUMAN	QVNETWTLENCTVAR	C
VVLLDPKPVAN[115]VTCVNK	0.9999	VVLLDPKPVANVTCVNK	MUC5B_HUMAN	VVLLDPKPVANVTCVNK	H
FGN[115]LSLYLDNHYCTASATAAAAR	0.9999	FGNLSLYLDNHYCTASATAAAAR	MUC5B_HUMAN	FGNLSLYLDNHYCTASATAAAAR	C
LDGPTEQCPDPLPLPAGN[115]CTDEEGICHR	0.9999	LDGPTEQCPDPLPLPAGNCTDEEGICHR	MUC5B_HUMAN	LDGPTEQCPDPLPLPAGNCTDEEGICHR	T
IN[115]TTILWHQGCETEVN[115]ITFCEGSCPGASK	0.9999	INTTILWHQGCETEVNITFCEGSCPGASK	MUC5B_HUMAN	INTTILWHQGCETEVNITFCEGSCPGASK	Y
LPYSLFHN[115]NTEGQCGTCTNNQR	0.9999	LPYSLFHNNTEGQCGTCTNNQR	MUC5B_HUMAN	LPYSLFHNNTEGQCGTCTNNQR	D
YAN[115]QTCGLCGDFNGLPAFNEFYAHNAR	0.9999	YANQTCGLCGDFNGLPAFNEFYAHNAR	MUC5B_HUMAN	YANQTCGLCGDFNGLPAFNEFYAHNAR	L
YSFEGSCEYILAQDYCGDN[115]TTHGTFR	0.9999	YSFEGSCEYILAQDYCGDNTTHGTFR	MUC5B_HUMAN	YSFEGSCEYILAQDYCGDNTTHGTFR	I
FN[115]DTEVLQR	0.9999	FNDTEVLQR	BTD_HUMAN	FNDTEVLQR	L
NPVGLIGAEN[115]ATGETDPSHSK	0.9999	NPVGLIGAENATGETDPSHSK	BTD_HUMAN	NPVGLIGAENATGETDPSHSK	F
YQFNTNVVFSNN[115]GTLVDR	0.9999	YQFNTNVVFSNNGTLVDR	BTD_HUMAN	YQFNTNVVFSNNGTLVDR	Y
WNVNAPPTFHSEM[147]M[147]YDN[115]FTLVPVWGK	0.9999	WNVNAPPTFHSEMMYDNFTLVPVWGK	BTD_HUMAN	WNVNAPPTFHSEMMYDNFTLVPVWGK	E
LQAPLN[115]YTEFQKPICLPSK	0.9999	LQAPLNYTEFQKPICLPSK	KLKB1_HUMAN	LQAPLNYTEFQKPICLPSK	G
IYPGVDFGGEELN[115]VTFVK	0.9999	IYPGVDFGGEELNVTFVK	KLKB1_HUMAN	IYPGVDFGGEELNVTFVK	G
IYSGILN[115]LSDITK	0.9999	IYSGILNLSDITK	KLKB1_HUMAN	IYSGILNLSDITK	D
YPHKPEIN[115]STTHPGADLQENFCR	0.9999	YPHKPEINSTTHPGADLQENFCR	THRB_HUMAN	YPHKPEINSTTHPGADLQENFCR	N
FTFTSHTPGEHQICLHSN[115]STK	0.9999	FTFTSHTPGEHQICLHSNSTK	TMED9_HUMAN	FTFTSHTPGEHQICLHSNSTK	F
GVFITN[115]ETGQPLIGK	0.9999	GVFITNETGQPLIGK	LYAG_HUMAN	GVFITNETGQPLIGK	V
LEN[115]LSSSEMGYTATLTR	0.9999	LENLSSSEMGYTATLTR	LYAG_HUMAN	LENLSSSEMGYTATLTR	T
LEN[115]LSSSEM[147]GYTATLTR	0.9999	LENLSSSEMGYTATLTR	LYAG_HUMAN	LENLSSSEMGYTATLTR	T
FFN[115]FSWR	0.9999	FFNFSWR	ECE1_HUMAN	FFNFSWR	V
HLLEN[115]STASVSEAER	0.9999	HLLENSTASVSEAER	ECE1_HUMAN	HLLENSTASVSEAER	K
LGGWN[115]ITGPWAK	0.9999	LGGWNITGPWAK	ECE1_HUMAN	LGGWNITGPWAK	D
GQTAESLAVHN[115]ITVCEQK	0.9999	GQTAESLAVHNITVCEQK	CY24B_HUMAN	GQTAESLAVHNITVCEQK	I
VN[115]NSDPYSVALSELGDR	0.9999	VNNSDPYSVALSELGDR	CY24B_HUMAN	VNNSDPYSVALSELGDR	Q
HSHNN[115]NSSDLHPHK	0.9999	HSHNNNSSDLHPHK	HRG_HUMAN	HSHNNNSSDLHPHK	H
VIDFN[115]CTTSSVSSALANTK	0.9999	VIDFNCTTSSVSSALANTK	HRG_HUMAN	VIDFNCTTSSVSSALANTK	D
HSHNNN[115]SSDLHPHK	0.9999	HSHNNNSSDLHPHK	HRG_HUMAN	HSHNNNSSDLHPHK	H
DECWCPAN[115]STGK	0.9999	DECWCPANSTGK	LTBP2_HUMAN	DECWCPANSTGK	F
DGTQQAVPLEHPSSPWGLN[115]LTEK	0.9999	DGTQQAVPLEHPSSPWGLNLTEK	LTBP2_HUMAN	DGTQQAVPLEHPSSPWGLNLTEK	I
NVCGGQCCPGWTTAN[115]STNHCIKPVCEPPCQNR	0.9999	NVCGGQCCPGWTTANSTNHCIKPVCEPPCQNR	LTBP2_HUMAN	NVCGGQCCPGWTTANSTNHCIKPVCEPPCQNR	G
YYN[115]QSEDGSHTIQR	0.9999	YYNQSEDGSHTIQR	1A25_HUMAN	YYNQSEDGSHTIQR	M
EEQFN[115]STFR	0.9999	EEQFNSTFR	IGHG2_HUMAN	EEQFNSTFR	V
LDGSTN[115]FTR	0.9999	LDGSTNFTR	FGL2_HUMAN	LDGSTNFTR	T
LHVGNYN[115]GTAGDALR	0.9999	LHVGNYNGTAGDALR	FGL2_HUMAN	LHVGNYNGTAGDALR	F
VAN[115]LTFVVNSLDGK	0.9999	VANLTFVVNSLDGK	FGL2_HUMAN	VANLTFVVNSLDGK	C
ANIQFGDN[115]GTTISAVSNK	0.9999	ANIQFGDNGTTISAVSNK	SCRB2_HUMAN	ANIQFGDNGTTISAVSNK	A
LSDTTSQSN[115]STAK	0.9999	LSDTTSQSNSTAK	LAMB1_HUMAN	LSDTTSQSNSTAK	E
M[147]EM[147]PSTPQQLQN[115]LTEDIR	0.9999	MEMPSTPQQLQNLTEDIR	LAMB1_HUMAN	MEMPSTPQQLQNLTEDIR	E
VNASTTEPN[115]STVEQSALM[147]R	0.9999	VNASTTEPNSTVEQSALMR	LAMB1_HUMAN	VNASTTEPNSTVEQSALMR	D
VN[115]ASTTEPNSTVEQSALM[147]R	0.9999	VNASTTEPNSTVEQSALMR	LAMB1_HUMAN	VNASTTEPNSTVEQSALMR	D
VN[115]ASTTEPN[115]STVEQSALM[147]R	0.9999	VNASTTEPNSTVEQSALMR	LAMB1_HUMAN	VNASTTEPNSTVEQSALMR	D
GSLSYLN[115]VTR	0.9999	GSLSYLNVTR	CATD_HUMAN	GSLSYLNVTR	K
ILAPAYFILGGN[115]QSGEGCVITR	0.9999	ILAPAYFILGGNQSGEGCVITR	ASAH1_HUMAN	ILAPAYFILGGNQSGEGCVITR	D
TVLEN[115]STSYEEAK	0.9999	TVLENSTSYEEAK	ASAH1_HUMAN	TVLENSTSYEEAK	N
FNPN[115]ISWQPIPVHTVPITEDR	0.9999	FNPNISWQPIPVHTVPITEDR	PPAL_HUMAN	FNPNISWQPIPVHTVPITEDR	L
YEQLQN[115]ETR	0.9999	YEQLQNETR	PPAL_HUMAN	YEQLQNETR	Q
YHGFLN[115]TSYHR	0.9999	YHGFLNTSYHR	PPAL_HUMAN	YHGFLNTSYHR	Q
LPHDCFQN[115]ATNSFYYDVGR	0.9999	LPHDCFQNATNSFYYDVGR	CILP1_HUMAN	LPHDCFQNATNSFYYDVGR	C
NYIVPILWLN[115]ETGTIGDEK	0.9999	NYIVPILWLNETGTIGDEK	CD36_HUMAN	NYIVPILWLNETGTIGDEK	A
N[115]CTSYGVLDISK	0.9999	NCTSYGVLDISK	CD36_HUMAN	NCTSYGVLDISK	C
FQLLN[115]FSSSELK	0.9999	FQLLNFSSSELK	CADM1_HUMAN	FQLLNFSSSELK	V
VSLTN[115]VSISDEGR	0.9999	VSLTNVSISDEGR	CADM1_HUMAN	VSLTNVSISDEGR	Y
DTAVEGEEIEVN[115]CTAM[147]ASKPATTIR	0.9999	DTAVEGEEIEVNCTAMASKPATTIR	CADM1_HUMAN	DTAVEGEEIEVNCTAMASKPATTIR	W
VDDEM[147]PQHAVLSGPNLFINNLN[115]K	0.9999	VDDEMPQHAVLSGPNLFINNLNK	CADM1_HUMAN	VDDEMPQHAVLSGPNLFINNLNK	T
HECHFFN[115]GTER	0.9999	HECHFFNGTER	2B14_HUMAN	HECHFFNGTER	V
SECHFFN[115]GTER	0.9999	SECHFFNGTER	DRB3_HUMAN	SECHFFNGTER	V
N[115]VTHLLQQELTEAQK	0.9999	NVTHLLQQELTEAQK	BST2_HUMAN	NVTHLLQQELTEAQK	G
GFQDVEAQAATCN[115]HTVMALMASLDAEK	0.9999	GFQDVEAQAATCNHTVMALMASLDAEK	BST2_HUMAN	GFQDVEAQAATCNHTVMALMASLDAEK	A
GFQDVEAQAATCN[115]HTVMALM[147]ASLDAEK	0.9999	GFQDVEAQAATCNHTVMALMASLDAEK	BST2_HUMAN	GFQDVEAQAATCNHTVMALMASLDAEK	A
GFQDVEAQAATCN[115]HTVM[147]ALMASLDAEK	0.9999	GFQDVEAQAATCNHTVMALMASLDAEK	BST2_HUMAN	GFQDVEAQAATCNHTVMALMASLDAEK	A
GFQDVEAQAATCN[115]HTVM[147]ALM[147]ASLDAEK	0.9999	GFQDVEAQAATCNHTVMALMASLDAEK	BST2_HUMAN	GFQDVEAQAATCNHTVMALMASLDAEK	A
EGETCGAEDN[115]DSCGISLYK	0.9999	EGETCGAEDNDSCGISLYK	FBLN2_HUMAN	EGETCGAEDNDSCGISLYK	Q
DVDECALGTHN[115]CSEAETCHNIQGSFR	0.9999	DVDECALGTHNCSEAETCHNIQGSFR	FBLN2_HUMAN	DVDECALGTHNCSEAETCHNIQGSFR	C
ACHCPDAGGELICYQLPGCHGN[115]FSDAEEGDPER	0.9999	ACHCPDAGGELICYQLPGCHGNFSDAEEGDPER	FBLN2_HUMAN	ACHCPDAGGELICYQLPGCHGNFSDAEEGDPER	H
FAEAACDVVHVM[147]LN[115]GSR	0.9999	FAEAACDVVHVMLNGSR	CD38_HUMAN	FAEAACDVVHVMLNGSR	S
HPCN[115]ITEEDYQPLMK	0.9999	HPCNITEEDYQPLMK	CD38_HUMAN	HPCNITEEDYQPLMK	L
HPCN[115]ITEEDYQPLM[147]K	0.9999	HPCNITEEDYQPLMK	CD38_HUMAN	HPCNITEEDYQPLMK	L
LPTQN[115]ITFQTESSVAEQEAEFQSPK	0.9999	LPTQNITFQTESSVAEQEAEFQSPK	ITIH4_HUMAN	LPTQNITFQTESSVAEQEAEFQSPK	Y
YHYN[115]GTLLDGTLFDSSYSR	0.9999	YHYNGTLLDGTLFDSSYSR	FKBP9_HUMAN	YHYNGTLLDGTLFDSSYSR	N
YHYN[115]ASLLDGTLLDSTWNLGK	0.9999	YHYNASLLDGTLLDSTWNLGK	FKBP9_HUMAN	YHYNASLLDGTLLDSTWNLGK	T
YHYN[115]GTFLDGTLFDSSHNR	0.9999	YHYNGTFLDGTLFDSSHNR	FKBP9_HUMAN	YHYNGTFLDGTLFDSSHNR	M
NPPMGGNVVIFDTVITNQEEPYQN[115]HSGR	0.9999	NPPMGGNVVIFDTVITNQEEPYQNHSGR	C1QA_HUMAN	NPPMGGNVVIFDTVITNQEEPYQNHSGR	F
NPPM[147]GGNVVIFDTVITNQEEPYQN[115]HSGR	0.9999	NPPMGGNVVIFDTVITNQEEPYQNHSGR	C1QA_HUMAN	NPPMGGNVVIFDTVITNQEEPYQNHSGR	F
DVECGEGHFCHDN[115]QTCCR	0.9999	DVECGEGHFCHDNQTCCR	GRN_HUMAN	DVECGEGHFCHDNQTCCR	D
YGCCPM[147]PN[115]ATCCSDHLHCCPQDTVCDLIQSK	0.9999	YGCCPMPNATCCSDHLHCCPQDTVCDLIQSK	GRN_HUMAN	YGCCPMPNATCCSDHLHCCPQDTVCDLIQSK	C
IINDLAN[115]TSHVYM[147]LPN[115]GTLSIPK	0.9999	IINDLANTSHVYMLPNGTLSIPK	MXRA5_HUMAN	IINDLANTSHVYMLPNGTLSIPK	V
ITVHGN[115]GSLDIR	0.9999	ITVHGNGSLDIR	MXRA5_HUMAN	ITVHGNGSLDIR	S
SDSGN[115]YTCLVR	0.9999	SDSGNYTCLVR	MXRA5_HUMAN	SDSGNYTCLVR	N
VFAN[115]GTLVVK	0.9999	VFANGTLVVK	MXRA5_HUMAN	VFANGTLVVK	S
VSLLDN[115]GTLTVR	0.9999	VSLLDNGTLTVR	MXRA5_HUMAN	VSLLDNGTLTVR	E
YVVFNN[115]GTLYFNEVGM[147]R	0.9999	YVVFNNGTLYFNEVGMR	MXRA5_HUMAN	YVVFNNGTLYFNEVGMR	E
YSVAN[115]DTGFVDIPK	0.9999	YSVANDTGFVDIPK	CATL1_HUMAN	YSVANDTGFVDIPK	Q
LNPTVTYGN[115]DSFSAK	0.9999	LNPTVTYGNDSFSAK	ICAM1_HUMAN	LNPTVTYGNDSFSAK	A
DCPGN[115]WTWPENSQQTPM[147]CQAWGNPLPELK	0.9999	DCPGNWTWPENSQQTPMCQAWGNPLPELK	ICAM1_HUMAN	DCPGNWTWPENSQQTPMCQAWGNPLPELK	C
EGDHEFLEVPEAQEDVEATFPVHQPGN[115]YSCSYR	0.9999	EGDHEFLEVPEAQEDVEATFPVHQPGNYSCSYR	A1BG_HUMAN	EGDHEFLEVPEAQEDVEATFPVHQPGNYSCSYR	T
PFLN[115]WTGPPEPIEAAVAR	0.9999	PFLNWTGPPEPIEAAVAR	TRFL_HUMAN	PFLNWTGPPEPIEAAVAR	F
TAGWNIPMGLLFN[115]QTGSCK	0.9999	TAGWNIPMGLLFNQTGSCK	TRFL_HUMAN	TAGWNIPMGLLFNQTGSCK	F
TAGWNIPM[147]GLLFN[115]QTGSCK	0.9999	TAGWNIPMGLLFNQTGSCK	TRFL_HUMAN	TAGWNIPMGLLFNQTGSCK	F
ILCDNADN[115]ITR	0.9999	ILCDNADNITR	PXDN_HUMAN	ILCDNADNITR	V
VNN[115]CSDM[147]CFHQK	0.9999	VNNCSDMCFHQK	PXDN_HUMAN	VNNCSDMCFHQK	Y
VYCN[115]LSAAHTFEDLK	0.9999	VYCNLSAAHTFEDLK	PXDN_HUMAN	VYCNLSAAHTFEDLK	N
AN[115]VTSENNM[147]PR	0.9999	ANVTSENNMPR	ITAM_HUMAN	ANVTSENNMPR	T
APVVN[115]CSIAVCQR	0.9999	APVVNCSIAVCQR	ITAM_HUMAN	APVVNCSIAVCQR	I
YLN[115]FTASEN[115]TSR	0.9999	YLNFTASENTSR	ITAM_HUMAN	YLNFTASENTSR	V
DFVN[115]CSTLPALNLASWR	0.9999	DFVNCSTLPALNLASWR	PERM_HUMAN	DFVNCSTLPALNLASWR	E
LGSYPVGGN[115]VSFECEDGFILR	0.9999	LGSYPVGGNVSFECEDGFILR	CO2_HUMAN	LGSYPVGGNVSFECEDGFILR	G
LTDTICGVGN[115]MSAN[115]ASDQER	0.9999	LTDTICGVGNMSANASDQER	CO2_HUMAN	LTDTICGVGNMSANASDQER	T
EEEAIQLDGLN[115]ASQIR	0.9999	EEEAIQLDGLNASQIR	ENPL_HUMAN	EEEAIQLDGLNASQIR	E
GVVDSDDLPLN[115]VSR	0.9999	GVVDSDDLPLNVSR	ENPL_HUMAN	GVVDSDDLPLNVSR	E
HNN[115]DTQHIWESDSNEFSVIADPR	0.9999	HNNDTQHIWESDSNEFSVIADPR	ENPL_HUMAN	HNNDTQHIWESDSNEFSVIADPR	G
GPGIKPN[115]QTSK	0.9999	GPGIKPNQTSK	GNS_HUMAN	GPGIKPNQTSK	M
TPM[147]TN[115]SSIQFLDNAFR	0.9999	TPMTNSSIQFLDNAFR	GNS_HUMAN	TPMTNSSIQFLDNAFR	K
YPHNHHVVN[115]NTLEGN[115]CSSK	0.9999	YPHNHHVVNNTLEGNCSSK	GNS_HUMAN	YPHNHHVVNNTLEGNCSSK	S
HVNEIN[115]ATIYLLK	0.9999	HVNEINATIYLLK	LAMA4_HUMAN	HVNEINATIYLLK	T
LLLTAN[115]VSSENNTPR	0.9999	LLLTANVSSENNTPR	ITAX_HUMAN	LLLTANVSSENNTPR	T
LLLTAN[115]VSSEN[115]NTPR	0.9999	LLLTANVSSENNTPR	ITAX_HUMAN	LLLTANVSSENNTPR	T
LN[115]FTLVGKPLLAFR	0.9999	LNFTLVGKPLLAFR	ITAX_HUMAN	LNFTLVGKPLLAFR	N
YLN[115]FSESEEK	0.9999	YLNFSESEEK	ITAX_HUMAN	YLNFSESEEK	E
VIEEFYN[115]QTWVHR	0.9999	VIEEFYNQTWVHR	GTR1_HUMAN	VIEEFYNQTWVHR	Y
DLDTDFTNN[115]ASQPETK	0.9999	DLDTDFTNNASQPETK	CBPD_HUMAN	DLDTDFTNNASQPETK	A
FANEYPN[115]ITR	0.9999	FANEYPNITR	CBPD_HUMAN	FANEYPNITR	L
LLN[115]TTDVYLLPSLNPDGFER	0.9999	LLNTTDVYLLPSLNPDGFER	CBPD_HUMAN	LLNTTDVYLLPSLNPDGFER	A
DSITGSGLEN[115]ATISVAGINHN[115]ITTGR	0.9999	DSITGSGLENATISVAGINHNITTGR	CBPD_HUMAN	DSITGSGLENATISVAGINHNITTGR	F
GLVM[147]NYPHITN[115]LTNLGQSTEYR	0.9999	GLVMNYPHITNLTNLGQSTEYR	CBPD_HUMAN	GLVMNYPHITNLTNLGQSTEYR	H
HIWSLEISNKPN[115]VSEPEEPK	0.9999	HIWSLEISNKPNVSEPEEPK	CBPD_HUMAN	HIWSLEISNKPNVSEPEEPK	I
ELYEPIWQN[115]FTDPQLR	0.9999	ELYEPIWQNFTDPQLR	ACE_HUMAN	ELYEPIWQNFTDPQLR	R
VTN[115]DTESDINYLLK	0.9999	VTNDTESDINYLLK	ACE_HUMAN	VTNDTESDINYLLK	M
AEFN[115]LTTYR	0.9999	AEFNLTTYR	CO6A6_HUMAN	AEFNLTTYR	S
GIFSDVTASVCN[115]SSK	0.9999	GIFSDVTASVCNSSK	CO6A6_HUMAN	GIFSDVTASVCNSSK	V
GPSLLNANLLDSLWDTFQN[115]K	0.9999	GPSLLNANLLDSLWDTFQNK	CO6A6_HUMAN	GPSLLNANLLDSLWDTFQNK	S
VGLVAYSN[115]ETK	0.9999	VGLVAYSNETK	CO6A6_HUMAN	VGLVAYSNETK	V
GICN[115]SSDVR	0.9999	GICNSSDVR	ATRN_HUMAN	GICNSSDVR	G
ISN[115]SSDTVECECSENWK	0.9999	ISNSSDTVECECSENWK	ATRN_HUMAN	ISNSSDTVECECSENWK	G
GCSCFSDWQGPGCSVPVPAN[115]QSFWTR	0.9999	GCSCFSDWQGPGCSVPVPANQSFWTR	ATRN_HUMAN	GCSCFSDWQGPGCSVPVPANQSFWTR	E
M[147]PSQAPTGNFYPQPLLN[115]SSM[147]CLEDSR	0.9999	MPSQAPTGNFYPQPLLNSSMCLEDSR	ATRN_HUMAN	MPSQAPTGNFYPQPLLNSSMCLEDSR	Y
ELQNSVLETTLM[147]PHN[115]YSR	0.9999	ELQNSVLETTLMPHNYSR	CD48_HUMAN	ELQNSVLETTLMPHNYSR	C
ALAGLVYN[115]ASGSEHCYDIYR	0.9999	ALAGLVYNASGSEHCYDIYR	DPP2_HUMAN	ALAGLVYNASGSEHCYDIYR	L
AVN[115]ITSENLIDDVVSLIR	0.9999	AVNITSENLIDDVVSLIR	CO9_HUMAN	AVNITSENLIDDVVSLIR	G
EGHFYYN[115]ISEVK	0.9999	EGHFYYNISEVK	PLTP_HUMAN	EGHFYYNISEVK	V
IYSN[115]HSALESLALIPLQAPLK	0.9999	IYSNHSALESLALIPLQAPLK	PLTP_HUMAN	IYSNHSALESLALIPLQAPLK	T
VSN[115]VSCQASVSR	0.9999	VSNVSCQASVSR	PLTP_HUMAN	VSNVSCQASVSR	M
GDHN[115]DSYALLGELAPCGSTDK	0.9999	GDHNDSYALLGELAPCGSTDK	MUC2_HUMAN	GDHNDSYALLGELAPCGSTDK	Q
IHM[147]DCSN[115]LTALATSKPR	0.9999	IHMDCSNLTALATSKPR	MUC2_HUMAN	IHMDCSNLTALATSKPR	A
NN[115]CTFFSCVK	0.9999	NNCTFFSCVK	MUC2_HUMAN	NNCTFFSCVK	I
YN[115]NTVEIVK	0.9999	YNNTVEIVK	MUC2_HUMAN	YNNTVEIVK	V
DVGSCPNSQVFLYN[115]LTTCQQTCR	0.9999	DVGSCPNSQVFLYNLTTCQQTCR	MUC2_HUMAN	DVGSCPNSQVFLYNLTTCQQTCR	S
IHMDCSN[115]LTALATSKPR	0.9999	IHMDCSNLTALATSKPR	MUC2_HUMAN	IHMDCSNLTALATSKPR	A
N[115]HTHGACLVECPSHR	0.9999	NHTHGACLVECPSHR	MUC2_HUMAN	NHTHGACLVECPSHR	E
AYVCGIQNSVSAN[115]R	0.9999	AYVCGIQNSVSANR	CEAM5_HUMAN	AYVCGIQNSVSANR	S
ITPNNN[115]GTYACFVSNLATGR	0.9999	ITPNNNGTYACFVSNLATGR	CEAM5_HUMAN	ITPNNNGTYACFVSNLATGR	N
NSGLYTCQAN[115]NSASGHSR	0.9999	NSGLYTCQANNSASGHSR	CEAM5_HUMAN	NSGLYTCQANNSASGHSR	T
VTQN[115]LTLIEESLTSEFIHDIDR	0.9999	VTQNLTLIEESLTSEFIHDIDR	PEDF_HUMAN	VTQNLTLIEESLTSEFIHDIDR	E
LHVTLYN[115]CSFGR	0.9999	LHVTLYNCSFGR	PLXB2_HUMAN	LHVTLYNCSFGR	S
LSHDAN[115]ETLPLHLYVK	0.9999	LSHDANETLPLHLYVK	PLXB2_HUMAN	LSHDANETLPLHLYVK	S
EAESLQPM[147]TVVGTDYVFHN[115]DTK	0.9999	EAESLQPMTVVGTDYVFHNDTK	PLXB2_HUMAN	EAESLQPMTVVGTDYVFHNDTK	V
GGLN[115]LTAVTVAAENN[115]HTVAFLGTSDGR	0.9999	GGLNLTAVTVAAENNHTVAFLGTSDGR	PLXB2_HUMAN	GGLNLTAVTVAAENNHTVAFLGTSDGR	I
EINSLN[115]LTESHNSR	0.9999	EINSLNLTESHNSR	ITA6_HUMAN	EINSLNLTESHNSR	K
LWN[115]STFLEEYSK	0.9999	LWNSTFLEEYSK	ITA6_HUMAN	LWNSTFLEEYSK	L
YQTLN[115]CSVNVNCVNIR	0.9999	YQTLNCSVNVNCVNIR	ITA6_HUMAN	YQTLNCSVNVNCVNIR	C
EEQYN[115]STYR	0.9999	EEQYNSTYR	IGHG1_HUMAN	EEQYNSTYR	V
VYCN[115]FTAGGSTCVFPDK	0.9999	VYCNFTAGGSTCVFPDK	CO5A1_HUMAN	VYCNFTAGGSTCVFPDK	K
LLSASAHQN[115]VTYHCYQSVAWQDAATGSYDK	0.9999	LLSASAHQNVTYHCYQSVAWQDAATGSYDK	CO5A1_HUMAN	LLSASAHQNVTYHCYQSVAWQDAATGSYDK	A
DVN[115]CSVM[147]GPQEK	0.9999	DVNCSVMGPQEK	CATC_HUMAN	DVNCSVMGPQEK	K
ILTN[115]NSQTPILSPQEVVSCSQYAQGCEGGFPYLIAGK	0.9999	ILTNNSQTPILSPQEVVSCSQYAQGCEGGFPYLIAGK	CATC_HUMAN	ILTNNSQTPILSPQEVVSCSQYAQGCEGGFPYLIAGK	Y
VTTYCN[115]ETM[147]TGWVHDVLGR	0.9999	VTTYCNETMTGWVHDVLGR	CATC_HUMAN	VTTYCNETMTGWVHDVLGR	N
AYLLPAPPAPGN[115]ASESEEDR	0.9999	AYLLPAPPAPGNASESEEDR	IBP3_HUMAN	AYLLPAPPAPGNASESEEDR	S
GLCVN[115]ASAVSR	0.9999	GLCVNASAVSR	IBP3_HUMAN	GLCVNASAVSR	L
VDYESQSTDTQN[115]FSSESKR	0.9999	VDYESQSTDTQNFSSESKR	IBP3_HUMAN	VDYESQSTDTQNFSSESKR	E
DILN[115]GTFSYK	0.9999	DILNGTFSYK	SEPR_HUMAN	DILNGTFSYK	T
VQN[115]VSVLSICDFR	0.9999	VQNVSVLSICDFR	SEPR_HUMAN	VQNVSVLSICDFR	E
VFPYISVM[147]VNN[115]GSLSYDHSK	0.9999	VFPYISVMVNNGSLSYDHSK	LMAN2_HUMAN	VFPYISVMVNNGSLSYDHSK	D
ITIAIN[115]NTLTPTTLPPGTIQYLTDTSK	0.9999	ITIAINNTLTPTTLPPGTIQYLTDTSK	BGLR_HUMAN	ITIAINNTLTPTTLPPGTIQYLTDTSK	Y
VVAN[115]GTGTQGQLK	0.9999	VVANGTGTQGQLK	BGLR_HUMAN	VVANGTGTQGQLK	V
NCQDIDECVTGIHN[115]CSIN[115]ETCFNIQGGFR	0.9999	NCQDIDECVTGIHNCSINETCFNIQGGFR	FBLN1_HUMAN	NCQDIDECVTGIHNCSINETCFNIQGGFR	C
DLQAPLGQSFSCSN[115]SSIILSPAVHLDLLSLR	0.9999	DLQAPLGQSFSCSNSSIILSPAVHLDLLSLR	CD68_HUMAN	DLQAPLGQSFSCSNSSIILSPAVHLDLLSLR	L
ETIGDYTWTN[115]GSQPCVHLQAQIQIR	0.9999	ETIGDYTWTNGSQPCVHLQAQIQIR	CD68_HUMAN	ETIGDYTWTNGSQPCVHLQAQIQIR	V
GHCWGPGPTQCVN[115]CSQFLR	0.9999	GHCWGPGPTQCVNCSQFLR	ERBB2_HUMAN	GHCWGPGPTQCVNCSQFLR	G
NNQLALTLIDTN[115]R	0.9999	NNQLALTLIDTNR	ERBB2_HUMAN	NNQLALTLIDTNR	S
FPDEEGACQPCPIN[115]CTHSCVDLDDK	0.9999	FPDEEGACQPCPINCTHSCVDLDDK	ERBB2_HUMAN	FPDEEGACQPCPINCTHSCVDLDDK	G
HCLPCHPECQPQN[115]GSVTCFGPEADQCVACAHYK	0.9999	HCLPCHPECQPQNGSVTCFGPEADQCVACAHYK	ERBB2_HUMAN	HCLPCHPECQPQNGSVTCFGPEADQCVACAHYK	D
ICNQN[115]SSNPNQR	0.9999	ICNQNSSNPNQR	LAMA2_HUMAN	ICNQNSSNPNQR	H
LEQM[147]VM[147]SIN[115]LTGPLPAPYK	0.9999	LEQMVMSINLTGPLPAPYK	LAMA2_HUMAN	LEQMVMSINLTGPLPAPYK	M
YM[147]QN[115]LTVEQPIEVK	0.9999	YMQNLTVEQPIEVK	LAMA2_HUMAN	YMQNLTVEQPIEVK	K
GLFPAVLNLASNALITTN[115]ATCGEK	0.9999	GLFPAVLNLASNALITTNATCGEK	LAMA2_HUMAN	GLFPAVLNLASNALITTNATCGEK	G
VLNN[115]ITNDLR	0.9999	VLNNITNDLR	MSRE_HUMAN	VLNNITNDLR	L
VYN[115]VSAEIM[147]AM[147]K	0.9999	VYNVSAEIMAMK	MSRE_HUMAN	VYNVSAEIMAMK	E
IQHILDM[147]EANLM[147]DTEHFQN[115]FSM[147]TTDQR	0.9999	IQHILDMEANLMDTEHFQNFSMTTDQR	MSRE_HUMAN	IQHILDMEANLMDTEHFQNFSMTTDQR	F
GN[115]STHGCSSEETFLIDCR	0.9999	GNSTHGCSSEETFLIDCR	UPAR_HUMAN	GNSTHGCSSEETFLIDCR	G
LGSVLLQM[147]TN[115]NTGAELSPPGAAALPGVSGSGDER	0.9999	LGSVLLQMTNNTGAELSPPGAAALPGVSGSGDER	EMIL2_HUMAN	LGSVLLQMTNNTGAELSPPGAAALPGVSGSGDER	V
LQQDFSFLYSQLN[115]HTENDVTHLQK	0.9999	LQQDFSFLYSQLNHTENDVTHLQK	EMIL2_HUMAN	LQQDFSFLYSQLNHTENDVTHLQK	E
LN[115]QTEPVAGNYYPVNTR	0.9999	LNQTEPVAGNYYPVNTR	MA2B1_HUMAN	LNQTEPVAGNYYPVNTR	I
IPLVN[115]ISLLPK	0.9999	IPLVNISLLPK	GNPTA_HUMAN	IPLVNISLLPK	D
VPM[147]LVLDPALPAN[115]ITLK	0.9999	VPMLVLDPALPANITLK	GNPTA_HUMAN	VPMLVLDPALPANITLK	D
IHELPLSLQDLTGLEHM[147]LIN[115]CSK	0.9999	IHELPLSLQDLTGLEHMLINCSK	GNPTA_HUMAN	IHELPLSLQDLTGLEHMLINCSK	M
EASQN[115]ITYICK	0.9999	EASQNITYICK	CO5A2_HUMAN	EASQNITYICK	N
IN[115]NTHALVSLLQNLNK	0.9999	INNTHALVSLLQNLNK	CAD13_HUMAN	INNTHALVSLLQNLNK	A
ANYNLPIM[147]VTDSGKPPM[147]TN[115]ITDLR	0.9999	ANYNLPIMVTDSGKPPMTNITDLR	CAD13_HUMAN	ANYNLPIMVTDSGKPPMTNITDLR	V
DADACN[115]ATNWIEYM[147]FNK	0.9999	DADACNATNWIEYMFNK	NPC1_HUMAN	DADACNATNWIEYMFNK	D
LIASN[115]VTETM[147]GIN[115]GSAYR	0.9999	LIASNVTETMGINGSAYR	NPC1_HUMAN	LIASNVTETMGINGSAYR	V
VDN[115]ITDQFCN[115]ASVVDPACVR	0.9999	VDNITDQFCNASVVDPACVR	NPC1_HUMAN	VDNITDQFCNASVVDPACVR	C
DYFTDLITN[115]ESINYFK	0.9999	DYFTDLITNESINYFK	SULF1_HUMAN	DYFTDLITNESINYFK	M
FYN[115]YTVCR	0.9999	FYNYTVCR	SULF1_HUMAN	FYNYTVCR	N
YLNEYN[115]GSYIPPGWR	0.9999	YLNEYNGSYIPPGWR	SULF1_HUMAN	YLNEYNGSYIPPGWR	E
LYPN[115]ASQHITPSYNYAPNM[147]DK	0.9999	LYPNASQHITPSYNYAPNMDK	SULF1_HUMAN	LYPNASQHITPSYNYAPNMDK	H
VLNSIGSDIDN[115]VTQR	0.9999	VLNSIGSDIDNVTQR	PROM1_HUMAN	VLNSIGSDIDNVTQR	L
YILAQYN[115]TTK	0.9999	YILAQYNTTK	PROM1_HUMAN	YILAQYNTTK	D
LPIQDILSAFSVYVN[115]NTESYIHR	0.9999	LPIQDILSAFSVYVNNTESYIHR	PROM1_HUMAN	LPIQDILSAFSVYVNNTESYIHR	N
GVLM[147]VGN[115]ETTYEDGHGSR	0.9999	GVLMVGNETTYEDGHGSR	CTL2_HUMAN	GVLMVGNETTYEDGHGSR	K
TCNPETFPSSN[115]ESR	0.9999	TCNPETFPSSNESR	CTL2_HUMAN	TCNPETFPSSNESR	Q
FVQGN[115]STEVACHPGYGLPK	0.9999	FVQGNSTEVACHPGYGLPK	FHR3_HUMAN	FVQGNSTEVACHPGYGLPK	A
LGYNAN[115]TSILSFQAVCR	0.9999	LGYNANTSILSFQAVCR	FHR3_HUMAN	LGYNANTSILSFQAVCR	E
GISDN[115]YTLALITYALSSVGSPK	0.9999	GISDNYTLALITYALSSVGSPK	CD109_HUMAN	GISDNYTLALITYALSSVGSPK	A
HLN[115]GTITAK	0.9999	HLNGTITAK	CD109_HUMAN	HLNGTITAK	Y
IN[115]YTVPQSGTFK	0.9999	INYTVPQSGTFK	CD109_HUMAN	INYTVPQSGTFK	I
TASN[115]LTVSVLEAEGVFEK	0.9999	TASNLTVSVLEAEGVFEK	CD109_HUMAN	TASNLTVSVLEAEGVFEK	G
AN[115]NSWFQSILR	0.9999	ANNSWFQSILR	NICA_HUMAN	ANNSWFQSILR	Q
ALYELAGGTN[115]FSDTVQADPQTVTR	0.9999	ALYELAGGTNFSDTVQADPQTVTR	NICA_HUMAN	ALYELAGGTNFSDTVQADPQTVTR	L
IPN[115]NTQWVTWSPVGHK	0.9999	IPNNTQWVTWSPVGHK	DPP4_HUMAN	IPNNTQWVTWSPVGHK	L
GPLANPIWN[115]VTGFTGR	0.9999	GPLANPIWNVTGFTGR	PTPRK_HUMAN	GPLANPIWNVTGFTGR	D
IAVDWESLGYN[115]ITR	0.9999	IAVDWESLGYNITR	PTPRK_HUMAN	IAVDWESLGYNITR	C
LGDVEVNAGQN[115]ATFQCIATGR	0.9999	LGDVEVNAGQNATFQCIATGR	PTPRK_HUMAN	LGDVEVNAGQNATFQCIATGR	D
GCASYCN[115]QTIM[147]EQGCCK	0.9999	GCASYCNQTIMEQGCCK	STAB1_HUMAN	GCASYCNQTIMEQGCCK	G
IVAGSCVDCQALN[115]TSTCPPNSVK	0.9999	IVAGSCVDCQALNTSTCPPNSVK	STAB1_HUMAN	IVAGSCVDCQALNTSTCPPNSVK	L
GDGPFTIFVPHADLM[147]SN[115]LSQDELAR	0.9999	GDGPFTIFVPHADLMSNLSQDELAR	STAB1_HUMAN	GDGPFTIFVPHADLMSNLSQDELAR	I
FCN[115]ESM[147]GDCGPTGLAQHCHLHAR	0.9999	FCNESMGDCGPTGLAQHCHLHAR	STAB1_HUMAN	FCNESMGDCGPTGLAQHCHLHAR	C
NGLQNCATHTQPFWGSLTN[115]R	0.9999	NGLQNCATHTQPFWGSLTNR	DMB_HUMAN	NGLQNCATHTQPFWGSLTNR	T
EIVCN[115]VTLGGER	0.9999	EIVCNVTLGGER	ICAM3_HUMAN	EIVCNVTLGGER	R
VELAPLPPWQPVGQN[115]FTLR	0.9999	VELAPLPPWQPVGQNFTLR	ICAM3_HUMAN	VELAPLPPWQPVGQNFTLR	C
VEPQNPVLSAGGSLFVN[115]CSTDCPSSEK	0.9999	VEPQNPVLSAGGSLFVNCSTDCPSSEK	ICAM3_HUMAN	VEPQNPVLSAGGSLFVNCSTDCPSSEK	I
DITDLIN[115]NTFIR	0.9999	DITDLINNTFIR	SORT_HUMAN	DITDLINNTFIR	T
LAN[115]NTHQHVFDDLR	0.9999	LANNTHQHVFDDLR	SORT_HUMAN	LANNTHQHVFDDLR	G
HLYTTTGGETDFTN[115]VTSLR	0.9999	HLYTTTGGETDFTNVTSLR	SORT_HUMAN	HLYTTTGGETDFTNVTSLR	G
EGICNGFTALCPASDPKPN[115]FTDCNR	0.9999	EGICNGFTALCPASDPKPNFTDCNR	ADA10_HUMAN	EGICNGFTALCPASDPKPNFTDCNR	H
LN[115]DTTLQVLNTWYTK	0.9999	LNDTTLQVLNTWYTK	OLFM4_HUMAN	LNDTTLQVLNTWYTK	Q
VN[115]LTTNTIAVTQTLPNAAYNNR	0.9999	VNLTTNTIAVTQTLPNAAYNNR	OLFM4_HUMAN	VNLTTNTIAVTQTLPNAAYNNR	F
YVQDQVAAPFQLSN[115]HTGR	0.9999	YVQDQVAAPFQLSNHTGR	LTBP1_HUMAN	YVQDQVAAPFQLSNHTGR	I
IVLDPSGSM[147]NIYLVLDGSDSIGASN[115]FTGAK	0.9999	IVLDPSGSMNIYLVLDGSDSIGASNFTGAK	CFAB_HUMAN	IVLDPSGSMNIYLVLDGSDSIGASNFTGAK	K
SPYYN[115]VSDEISFHCYDGYTLR	0.9999	SPYYNVSDEISFHCYDGYTLR	CFAB_HUMAN	SPYYNVSDEISFHCYDGYTLR	G
EGYSN[115]ISYIVVNHQGISSR	0.9999	EGYSNISYIVVNHQGISSR	SEPP1_HUMAN	EGYSNISYIVVNHQGISSR	L
LSQGN[115]TTLSINPVKR	0.9999	LSQGNTTLSINPVKR	CEAM1_HUMAN	LSQGNTTLSINPVKR	E
GTAN[115]TTTAGVPCQR	0.9999	GTANTTTAGVPCQR	HGFL_HUMAN	GTANTTTAGVPCQR	W
AFHYN[115]VSSHGCQLLPWTQHSPHTR	0.9999	AFHYNVSSHGCQLLPWTQHSPHTR	HGFL_HUMAN	AFHYNVSSHGCQLLPWTQHSPHTR	L
GN[115]ITEYQCHQYITK	0.9999	GNITEYQCHQYITK	GSLG1_HUMAN	GNITEYQCHQYITK	M
LN[115]LTTDPK	0.9999	LNLTTDPK	GSLG1_HUMAN	LNLTTDPK	F
LCHTHGWN[115]ETSEFM[147]PQGAVFSCLYR	0.9999	LCHTHGWNETSEFMPQGAVFSCLYR	GSLG1_HUMAN	LCHTHGWNETSEFMPQGAVFSCLYR	H
AQPGTM[147]SN[115]GTETR	0.9999	AQPGTMSNGTETR	SUSD2_HUMAN	AQPGTMSNGTETR	G
DCN[115]ATTEFM[147]CNNR	0.9999	DCNATTEFMCNNR	LRP2_HUMAN	DCNATTEFMCNNR	R
M[147]LAQHCVDAN[115]NTFCFDNPR	0.9999	MLAQHCVDANNTFCFDNPR	LRP2_HUMAN	MLAQHCVDANNTFCFDNPR	G
NFN[115]ASWNSIPNTNDPCADNYR	0.9999	NFNASWNSIPNTNDPCADNYR	CBPA3_HUMAN	NFNASWNSIPNTNDPCADNYR	G
LESM[147]PPGLPSSLM[147]YLSLEN[115]NSISSIPEK	0.9999	LESMPPGLPSSLMYLSLENNSISSIPEK	OMD_HUMAN	LESMPPGLPSSLMYLSLENNSISSIPEK	Y
LQTNAM[147]DGLVN[115]LTM[147]LDLCYNYLHDSLLK	0.9999	LQTNAMDGLVNLTMLDLCYNYLHDSLLK	OMD_HUMAN	LQTNAMDGLVNLTMLDLCYNYLHDSLLK	D
DHN[115]ATSILQQLPLLSAM[147]R	0.9999	DHNATSILQQLPLLSAMR	BPIB1_HUMAN	DHNATSILQQLPLLSAMR	E
GDQLILNLNN[115]ISSDR	0.9999	GDQLILNLNNISSDR	BPIB1_HUMAN	GDQLILNLNNISSDR	I
DAGVGFPEYQEEDN[115]STYNFR	0.9999	DAGVGFPEYQEEDNSTYNFR	MPRI_HUMAN	DAGVGFPEYQEEDNSTYNFR	W
M[147]N[115]FTGGDTCHK	0.9999	MNFTGGDTCHK	MPRI_HUMAN	MNFTGGDTCHK	V
AACAVKPQEVQM[147]VN[115]GTITNPINGK	0.9999	AACAVKPQEVQMVNGTITNPINGK	MPRI_HUMAN	AACAVKPQEVQMVNGTITNPINGK	S
NELM[147]LN[115]SSLM[147]R	0.9999	NELMLNSSLMR	AGRIN_HUMAN	NELMLNSSLMR	I
GPTFAPLPPVAPLHCAQTPYGCCQDN[115]ITAAR	0.9999	GPTFAPLPPVAPLHCAQTPYGCCQDNITAAR	AGRIN_HUMAN	GPTFAPLPPVAPLHCAQTPYGCCQDNITAAR	G
EAAGSPAN[115]FSWFR	0.9999	EAAGSPANFSWFR	SN_HUMAN	EAAGSPANFSWFR	N
LDAHSIPLPN[115]VTVR	0.9999	LDAHSIPLPNVTVR	SN_HUMAN	LDAHSIPLPNVTVR	D
VVAEPGLDVPEGAALN[115]LSCR	0.9999	VVAEPGLDVPEGAALNLSCR	SN_HUMAN	VVAEPGLDVPEGAALNLSCR	L
NILPGELVTLTCQVN[115]SSYPAVSSIK	0.9999	NILPGELVTLTCQVNSSYPAVSSIK	SN_HUMAN	NILPGELVTLTCQVNSSYPAVSSIK	W
ETLEN[115]NSFLITTVN[115]K	0.9999	ETLENNSFLITTVNK	COL12_HUMAN	ETLENNSFLITTVNK	T
HTDDLTSLN[115]NTLANIR	0.9999	HTDDLTSLNNTLANIR	COL12_HUMAN	HTDDLTSLNNTLANIR	L
VQSLQTLAAN[115]NSALAK	0.9999	VQSLQTLAANNSALAK	COL12_HUMAN	VQSLQTLAANNSALAK	A
EAN[115]LTSSVTILPLPLQN[115]ATVEAGTR	0.9999	EANLTSSVTILPLPLQNATVEAGTR	CAP7_HUMAN	EANLTSSVTILPLPLQNATVEAGTR	C
HPFTGDN[115]CTIK	0.9999	HPFTGDNCTIK	MMRN1_HUMAN	HPFTGDNCTIK	L
INN[115]LTVSLEM[147]EK	0.9999	INNLTVSLEMEK	MMRN1_HUMAN	INNLTVSLEMEK	E
LN[115]DSIQTLVNDNQR	0.9999	LNDSIQTLVNDNQR	MMRN1_HUMAN	LNDSIQTLVNDNQR	Y
M[147]YQM[147]FN[115]ETTSQVR	0.9999	MYQMFNETTSQVR	MMRN1_HUMAN	MYQMFNETTSQVR	K
VN[115]ESVVSIAAQQK	0.9999	VNESVVSIAAQQK	MMRN1_HUMAN	VNESVVSIAAQQK	F
DFEDLYTPVN[115]GSIVIVR	0.9999	DFEDLYTPVNGSIVIVR	TFR1_HUMAN	DFEDLYTPVNGSIVIVR	A
EVIDTN[115]LTTLR	0.9999	EVIDTNLTTLR	LAMA3_HUMAN	EVIDTNLTTLR	D
AHCVWLECPIPDAPVVTN[115]VTVK	0.9999	AHCVWLECPIPDAPVVTNVTVK	ITA3_HUMAN	AHCVWLECPIPDAPVVTNVTVK	A
GYYN[115]QSEAGSHTIQMMYGCDVGPDGR	0.9999	GYYNQSEAGSHTIQMMYGCDVGPDGR	1A74_HUMAN	GYYNQSEAGSHTIQMMYGCDVGPDGR	L
YYN[115]QSEAGSHTIQMMYGCDVGPDGR	0.9999	YYNQSEAGSHTIQMMYGCDVGPDGR	1A32_HUMAN	YYNQSEAGSHTIQMMYGCDVGPDGR	L
AIN[115]QTAVECTWTGPR	0.9999	AINQTAVECTWTGPR	SORL_HUMAN	AINQTAVECTWTGPR	N
M[147]GHN[115]YTFTVQAR	0.9999	MGHNYTFTVQAR	SORL_HUMAN	MGHNYTFTVQAR	C
VEGLQGVYIATLIN[115]GSM[147]NEENM[147]R	0.9999	VEGLQGVYIATLINGSMNEENMR	SORL_HUMAN	VEGLQGVYIATLINGSMNEENMR	S
YYN[115]QSEAGSHTWQR	0.9999	YYNQSEAGSHTWQR	1B49_HUMAN	YYNQSEAGSHTWQR	M
DGHGTAISN[115]ASDVWK	0.9999	DGHGTAISNASDVWK	LY75_HUMAN	DGHGTAISNASDVWK	K
IYEDEVPFGTNCN[115]LTITSR	0.9999	IYEDEVPFGTNCNLTITSR	LY75_HUMAN	IYEDEVPFGTNCNLTITSR	F
KPLN[115]NTVELTDVWTYSDTR	0.9999	KPLNNTVELTDVWTYSDTR	LY75_HUMAN	KPLNNTVELTDVWTYSDTR	C
APQLN[115]HSNSDVVSINCNIR	0.9999	APQLNHSNSDVVSINCNIR	ITA11_HUMAN	APQLNHSNSDVVSINCNIR	L
NPN[115]GTVTVISR	0.9999	NPNGTVTVISR	PVRL1_HUMAN	NPNGTVTVISR	Y
ESQLN[115]LTVM[147]AKPTNWIEGTQAVLR	0.9999	ESQLNLTVMAKPTNWIEGTQAVLR	PVRL1_HUMAN	ESQLNLTVMAKPTNWIEGTQAVLR	A
YYN[115]QSEAGSHTLQNMYGCDVGPDGR	0.9999	YYNQSEAGSHTLQNMYGCDVGPDGR	1B27_HUMAN	YYNQSEAGSHTLQNMYGCDVGPDGR	L
YYN[115]QSEAGSHTLQNM[147]YGCDVGPDGR	0.9999	YYNQSEAGSHTLQNMYGCDVGPDGR	1B27_HUMAN	YYNQSEAGSHTLQNMYGCDVGPDGR	L
EGSGYFFLN[115]TSTADVVK	0.9999	EGSGYFFLNTSTADVVK	PO210_HUMAN	EGSGYFFLNTSTADVVK	V
GPTN[115]NTCVVR	0.9999	GPTNNTCVVR	PO210_HUMAN	GPTNNTCVVR	T
FFQN[115]VTAEDTDSIGLALFAPHSSR	0.9999	FFQNVTAEDTDSIGLALFAPHSSR	PO210_HUMAN	FFQNVTAEDTDSIGLALFAPHSSR	N
VQCSPGHFYN[115]TTTHR	0.9999	VQCSPGHFYNTTTHR	SCUB2_HUMAN	VQCSPGHFYNTTTHR	C
NNCVSCPGN[115]TTTDFDGSTN[115]ITQCK	0.9999	NNCVSCPGNTTTDFDGSTNITQCK	SCUB2_HUMAN	NNCVSCPGNTTTDFDGSTNITQCK	N
IQQESLGSAPLM[147]GDDHPN[115]ASR	0.9999	IQQESLGSAPLMGDDHPNASR	MIA3_HUMAN	IQQESLGSAPLMGDDHPNASR	D
EFVENSECIQCHPECLPQAM[147]N[115]ITCTGR	0.9999	EFVENSECIQCHPECLPQAMNITCTGR	EGFR_HUMAN	EFVENSECIQCHPECLPQAMNITCTGR	G
ITN[115]ISAVEM[147]TPLPTCLQFNR	0.9999	ITNISAVEMTPLPTCLQFNR	PXDC2_HUMAN	ITNISAVEMTPLPTCLQFNR	C
LGATPVAM[147]LHTNN[115]ATLR	0.9999	LGATPVAMLHTNNATLR	BPIB2_HUMAN	LGATPVAMLHTNNATLR	L
SDDNLLN[115]TSALGR	0.9999	SDDNLLNTSALGR	BPIB2_HUMAN	SDDNLLNTSALGR	L
GCVLLSYLN[115]ETVTVSASLESVR	0.9999	GCVLLSYLNETVTVSASLESVR	A2MG_HUMAN	GCVLLSYLNETVTVSASLESVR	G
VSN[115]QTLSLFFTVLQDVPVR	0.9999	VSNQTLSLFFTVLQDVPVR	A2MG_HUMAN	VSNQTLSLFFTVLQDVPVR	D
FAN[115]NTEGQCGTCTNDR	0.9999	FANNTEGQCGTCTNDR	MUC5A_HUMAN	FANNTEGQCGTCTNDR	K
N[115]VTLHCTDGSSR	0.9999	NVTLHCTDGSSR	MUC5A_HUMAN	NVTLHCTDGSSR	A
ASQN[115]ITYHCK	0.9998	ASQNITYHCK	CO3A1_HUMAN	ASQNITYHCK	N
N[115]TTSYVLR	0.9998	NTTSYVLR	TENA_HUMAN	NTTSYVLR	G
VQPFN[115]VTQGK	0.9998	VQPFNVTQGK	LAMP2_HUMAN	VQPFNVTQGK	Y
DN[115]ATDSVPLR	0.9998	DNATDSVPLR	LRP1_HUMAN	DNATDSVPLR	T
LN[115]GTDPIVAADSKR	0.9998	LNGTDPIVAADSKR	LRP1_HUMAN	LNGTDPIVAADSKR	G
MATPLLM[147]QALPM[147]GALPQGPM[147]QN[115]ATK	0.9998	MATPLLMQALPMGALPQGPMQNATK	HG2A_HUMAN	MATPLLMQALPMGALPQGPMQNATK	Y
HMPWN[115]ITR	0.9998	HMPWNITR	SFRP4_HUMAN	HMPWNITR	M
FLSSSPHLPPSSYFN[115]ASGR	0.9998	FLSSSPHLPPSSYFNASGR	TPP1_HUMAN	FLSSSPHLPPSSYFNASGR	A
AFN[115]STLPTMAQMEK	0.9998	AFNSTLPTMAQMEK	CD44_HUMAN	AFNSTLPTMAQMEK	A
AFN[115]STLPTMAQM[147]EK	0.9998	AFNSTLPTMAQMEK	CD44_HUMAN	AFNSTLPTMAQMEK	A
AFN[115]STLPTM[147]AQMEK	0.9998	AFNSTLPTMAQMEK	CD44_HUMAN	AFNSTLPTMAQMEK	A
AFN[115]STLPTM[147]AQM[147]EK	0.9998	AFNSTLPTMAQMEK	CD44_HUMAN	AFNSTLPTMAQMEK	A
LAGKPTHVN[115]VSVVMAEVDGTCY	0.9998	LAGKPTHVNVSVVMAEVDGTCY	IGHA1_HUMAN	LAGKPTHVNVSVVMAEVDGTCY	-
LAGKPTHVN[115]VSVVM[147]AEVDGTCY	0.9998	LAGKPTHVNVSVVMAEVDGTCY	IGHA1_HUMAN	LAGKPTHVNVSVVMAEVDGTCY	-
PGAM[147]N[115]FSYSPLLR	0.9998	PGAMNFSYSPLLR	LAMA5_HUMAN	PGAMNFSYSPLLR	E
FLN[115]LTSEK	0.9998	FLNLTSEK	ENTP1_HUMAN	FLNLTSEK	V
YHYN[115]GSLM[147]DGTLFDSSYSR	0.9998	YHYNGSLMDGTLFDSSYSR	FKB10_HUMAN	YHYNGSLMDGTLFDSSYSR	N
YHYN[115]GTLLDGTSFDTSYSK	0.9998	YHYNGTLLDGTSFDTSYSK	FKB10_HUMAN	YHYNGTLLDGTSFDTSYSK	G
DFYVDEN[115]TTVR	0.9998	DFYVDENTTVR	KAIN_HUMAN	DFYVDENTTVR	V
FLN[115]DTMAVYEAK	0.9998	FLNDTMAVYEAK	KAIN_HUMAN	FLNDTMAVYEAK	L
FLN[115]DTM[147]AVYEAK	0.9998	FLNDTMAVYEAK	KAIN_HUMAN	FLNDTMAVYEAK	L
SQILEGLGFN[115]LTELSESDVHR	0.9998	SQILEGLGFNLTELSESDVHR	KAIN_HUMAN	SQILEGLGFNLTELSESDVHR	G
ALVN[115]FTR	0.9998	ALVNFTR	PGBM_HUMAN	ALVNFTR	S
DVQIIVFPEDGIHGFN[115]FTR	0.9998	DVQIIVFPEDGIHGFNFTR	BTD_HUMAN	DVQIIVFPEDGIHGFNFTR	T
TLYETEVFSTDFSN[115]ISAAK	0.9998	TLYETEVFSTDFSNISAAK	THBG_HUMAN	TLYETEVFSTDFSNISAAK	Q
VTACHSSQPN[115]ATLYK	0.9998	VTACHSSQPNATLYK	THBG_HUMAN	VTACHSSQPNATLYK	M
GYYN[115]QSEAGSHTIQR	0.9998	GYYNQSEAGSHTIQR	1C17_HUMAN	GYYNQSEAGSHTIQR	M
YYN[115]QSEAGSHTIQR	0.9998	YYNQSEAGSHTIQR	1B37_HUMAN	YYNQSEAGSHTIQR	M
CNMIN[115]GTDGDSFHPLITK	0.9998	CNMINGTDGDSFHPLITK	SCRB2_HUMAN	CNMINGTDGDSFHPLITK	D
GAFISN[115]FSMTVDGK	0.9998	GAFISNFSMTVDGK	ITIH2_HUMAN	GAFISNFSMTVDGK	T
GAFISN[115]FSM[147]TVDGK	0.9998	GAFISNFSMTVDGK	ITIH2_HUMAN	GAFISNFSMTVDGK	T
VVGVPYQGN[115]ATALFILPSEGK	0.9998	VVGVPYQGNATALFILPSEGK	IPSP_HUMAN	VVGVPYQGNATALFILPSEGK	M
IGN[115]ITPADAGTYYCVK	0.9998	IGNITPADAGTYYCVK	SHPS1_HUMAN	IGNITPADAGTYYCVK	F
AGPN[115]GTLFVADAYK	0.9998	AGPNGTLFVADAYK	APMAP_HUMAN	AGPNGTLFVADAYK	G
CHFFN[115]GTER	0.9998	CHFFNGTER	2B17_HUMAN	CHFFNGTER	V
EN[115]ATTDLLTK	0.9998	ENATTDLLTK	GRN_HUMAN	ENATTDLLTK	L
ILN[115]QTADMLQLASK	0.9998	ILNQTADMLQLASK	ANGL2_HUMAN	ILNQTADMLQLASK	Y
ILN[115]QTADM[147]LQLASK	0.9998	ILNQTADMLQLASK	ANGL2_HUMAN	ILNQTADMLQLASK	Y
YQHLATLAHN[115]QSEIIAQLEEHCQR	0.9998	YQHLATLAHNQSEIIAQLEEHCQR	ANGL2_HUMAN	YQHLATLAHNQSEIIAQLEEHCQR	V
GFGVAIVGN[115]YTAALPTEAALR	0.9998	GFGVAIVGNYTAALPTEAALR	PGRP2_HUMAN	GFGVAIVGNYTAALPTEAALR	T
LEPVHLQLQCMSQEQLAQVAAN[115]ATK	0.9998	LEPVHLQLQCMSQEQLAQVAANATK	PGRP2_HUMAN	LEPVHLQLQCMSQEQLAQVAANATK	E
LEPVHLQLQCM[147]SQEQLAQVAAN[115]ATK	0.9998	LEPVHLQLQCMSQEQLAQVAANATK	PGRP2_HUMAN	LEPVHLQLQCMSQEQLAQVAANATK	E
FLNN[115]GTCTAEGK	0.9998	FLNNGTCTAEGK	CFAI_HUMAN	FLNNGTCTAEGK	F
LSDLSIN[115]STECLHVHCR	0.9998	LSDLSINSTECLHVHCR	CFAI_HUMAN	LSDLSINSTECLHVHCR	G
LDAFFALEGFPTEPN[115]SSSR	0.9998	LDAFFALEGFPTEPNSSSR	SODE_HUMAN	LDAFFALEGFPTEPNSSSR	A
TM[147]FPN[115]LTDVR	0.9998	TMFPNLTDVR	CO2_HUMAN	TMFPNLTDVR	E
IN[115]ATDADEPNTLNSK	0.9998	INATDADEPNTLNSK	DSG2_HUMAN	INATDADEPNTLNSK	I
YVQN[115]GTYTVK	0.9998	YVQNGTYTVK	DSG2_HUMAN	YVQNGTYTVK	I
GASN[115]LTWR	0.9998	GASNLTWR	GNS_HUMAN	GASNLTWR	S
LHVGYLQPLVAVQVSFAPN[115]NTGK	0.9998	LHVGYLQPLVAVQVSFAPNNTGK	AT1B3_HUMAN	LHVGYLQPLVAVQVSFAPNNTGK	E
LNLQTSTSIPN[115]VTEM[147]K	0.9998	LNLQTSTSIPNVTEMK	ITA2_HUMAN	LNLQTSTSIPNVTEMK	T
YFFN[115]VSDEAALLEK	0.9998	YFFNVSDEAALLEK	ITA2_HUMAN	YFFNVSDEAALLEK	A
LAFATMFN[115]SSEQSQK	0.9998	LAFATMFNSSEQSQK	GGT1_HUMAN	LAFATMFNSSEQSQK	G
LAFATM[147]FN[115]SSEQSQK	0.9998	LAFATMFNSSEQSQK	GGT1_HUMAN	LAFATMFNSSEQSQK	G
ALSPN[115]STISSAPK	0.9998	ALSPNSTISSAPK	SUN2_HUMAN	ALSPNSTISSAPK	D
NM[147]QIAN[115]HTLK	0.9998	NMQIANHTLK	ACE_HUMAN	NMQIANHTLK	Y
GQTEIQVNCPPAVTEN[115]K	0.9998	GQTEIQVNCPPAVTENK	SYPL1_HUMAN	GQTEIQVNCPPAVTENK	T
EAGN[115]HTSGAGLVQINK	0.9998	EAGNHTSGAGLVQINK	MPRD_HUMAN	EAGNHTSGAGLVQINK	S
LN[115]ETHIFN[115]GSNWIM[147]LIYK	0.9998	LNETHIFNGSNWIMLIYK	MPRD_HUMAN	LNETHIFNGSNWIMLIYK	G
DYSLTFGAIN[115]QTWSYR	0.9998	DYSLTFGAINQTWSYR	NID2_HUMAN	DYSLTFGAINQTWSYR	I
IHQN[115]ITYQVCR	0.9998	IHQNITYQVCR	NID2_HUMAN	IHQNITYQVCR	H
GFCEAPGN[115]R	0.9998	GFCEAPGNR	CD82_HUMAN	GFCEAPGNR	T
VPLQSAHLYYN[115]VTEK	0.9998	VPLQSAHLYYNVTEK	P3H1_HUMAN	VPLQSAHLYYNVTEK	V
EWDN[115]TTTECR	0.9998	EWDNTTTECR	C4BPB_HUMAN	EWDNTTTECR	L
LGHCPDPVLVNGEFSSSGPVN[115]VSDK	0.9998	LGHCPDPVLVNGEFSSSGPVNVSDK	C4BPB_HUMAN	LGHCPDPVLVNGEFSSSGPVNVSDK	I
EGKPFYQM[147]TSN[115]ATQAFWTK	0.9998	EGKPFYQMTSNATQAFWTK	PECA1_HUMAN	EGKPFYQMTSNATQAFWTK	Q
VN[115]CSVPEEK	0.9998	VNCSVPEEK	PECA1_HUMAN	VNCSVPEEK	A
AVLVNN[115]ITTGER	0.9998	AVLVNNITTGER	GOLM1_HUMAN	AVLVNNITTGER	L
MLANLQN[115]ISLQNNR	0.9998	MLANLQNISLQNNR	LRC15_HUMAN	MLANLQNISLQNNR	L
M[147]LANLQN[115]ISLQNNR	0.9998	MLANLQNISLQNNR	LRC15_HUMAN	MLANLQNISLQNNR	L
VVFLSPAVPEEPEAYN[115]LTVLIEM[147]DGHR	0.9998	VVFLSPAVPEEPEAYNLTVLIEMDGHR	PLXB2_HUMAN	VVFLSPAVPEEPEAYNLTVLIEMDGHR	A
AN[115]TSALAVPSPVSNSASAR	0.9998	ANTSALAVPSPVSNSASAR	LAMB2_HUMAN	ANTSALAVPSPVSNSASAR	H
LGFLGN[115]QSQGCLPAR	0.9998	LGFLGNQSQGCLPAR	TSP3_HUMAN	LGFLGNQSQGCLPAR	T
EASIVGEN[115]ETYPR	0.9998	EASIVGENETYPR	SE1L1_HUMAN	EASIVGENETYPR	A
GQTALGFLYASGLGVN[115]SSQAK	0.9998	GQTALGFLYASGLGVNSSQAK	SE1L1_HUMAN	GQTALGFLYASGLGVNSSQAK	A
M[147]YSEGSDIVPQSN[115]ETALHYFK	0.9998	MYSEGSDIVPQSNETALHYFK	SE1L1_HUMAN	MYSEGSDIVPQSNETALHYFK	K
DLN[115]ETIHYM[147]YK	0.9998	DLNETIHYMYK	LGMN_HUMAN	DLNETIHYMYK	H
DINSQQELQN[115]ITTDTR	0.9998	DINSQQELQNITTDTR	PTPRF_HUMAN	DINSQQELQNITTDTR	F
ELDLTCN[115]ITTDR	0.9998	ELDLTCNITTDR	FPRP_HUMAN	ELDLTCNITTDR	A
LEN[115]WTDASR	0.9998	LENWTDASR	FPRP_HUMAN	LENWTDASR	V
VAEAVSSPAGVGVTWLEPDYQVYLN[115]ASK	0.9998	VAEAVSSPAGVGVTWLEPDYQVYLNASK	FPRP_HUMAN	VAEAVSSPAGVGVTWLEPDYQVYLNASK	V
YSVLIM[147]AEKPVGDLSSPN[115]ETK	0.9998	YSVLIMAEKPVGDLSSPNETK	FPRP_HUMAN	YSVLIMAEKPVGDLSSPNETK	Y
FLN[115]DSIVDPVDSEWFGFYR	0.9998	FLNDSIVDPVDSEWFGFYR	PPT1_HUMAN	FLNDSIVDPVDSEWFGFYR	S
GSN[115]YSEILDK	0.9998	GSNYSEILDK	FSTL1_HUMAN	GSNYSEILDK	Y
DYYPIN[115]ESLASLPLR	0.9998	DYYPINESLASLPLR	CLPT1_HUMAN	DYYPINESLASLPLR	V
YN[115]TSTLHHDIM[147]LLK	0.9998	YNTSTLHHDIMLLK	CMA1_HUMAN	YNTSTLHHDIMLLK	L
VLGQSQEPNVNPASAGN[115]QTQK	0.9998	VLGQSQEPNVNPASAGNQTQK	GP107_HUMAN	VLGQSQEPNVNPASAGNQTQK	T
PVTPIAQN[115]QTTLGSSR	0.9998	PVTPIAQNQTTLGSSR	C1RL_HUMAN	PVTPIAQNQTTLGSSR	A
FTFTSHTPGDHQICLHSN[115]STR	0.9998	FTFTSHTPGDHQICLHSNSTR	TMED4_HUMAN	FTFTSHTPGDHQICLHSNSTR	M
EGITLN[115]SSNPSGNAFLK	0.9998	EGITLNSSNPSGNAFLK	AMPE_HUMAN	EGITLNSSNPSGNAFLK	I
HTAEYAAN[115]ITK	0.9998	HTAEYAANITK	AMPE_HUMAN	HTAEYAANITK	S
WTEDN[115]ITSSVLFN[115]R	0.9998	WTEDNITSSVLFNR	AMPE_HUMAN	WTEDNITSSVLFNR	S
YVHNHNVYTNNEN[115]CSSPSWQAM[147]HEPR	0.9998	YVHNHNVYTNNENCSSPSWQAMHEPR	SULF1_HUMAN	YVHNHNVYTNNENCSSPSWQAMHEPR	T
NTNENPQECFN[115]ASK	0.9998	NTNENPQECFNASK	S39A6_HUMAN	NTNENPQECFNASK	L
YGEN[115]NSLSVEGFR	0.9998	YGENNSLSVEGFR	S39A6_HUMAN	YGENNSLSVEGFR	K
LLTSHGM[147]GIQVPLN[115]ATEFNYLCPAIINQIDAR	0.9998	LLTSHGMGIQVPLNATEFNYLCPAIINQIDAR	S39A6_HUMAN	LLTSHGMGIQVPLNATEFNYLCPAIINQIDAR	S
VHIN[115]TTSDSILLK	0.9998	VHINTTSDSILLK	TARSH_HUMAN	VHINTTSDSILLK	F
APLGGVILVHLIIPGLN[115]ETTVK	0.9998	APLGGVILVHLIIPGLNETTVK	TARSH_HUMAN	APLGGVILVHLIIPGLNETTVK	L
EALENM[147]N[115]STLK	0.9998	EALENMNSTLK	PROM1_HUMAN	EALENMNSTLK	S
DM[147]N[115]QTLGDNITVK	0.9998	DMNQTLGDNITVK	SPP2A_HUMAN	DMNQTLGDNITVK	M
DM[147]N[115]QTLGDN[115]ITVK	0.9998	DMNQTLGDNITVK	SPP2A_HUMAN	DMNQTLGDNITVK	M
DSSGVIHVM[147]LN[115]GSEPTGAYPIK	0.9998	DSSGVIHVMLNGSEPTGAYPIK	BST1_HUMAN	DSSGVIHVMLNGSEPTGAYPIK	G
EGFSAN[115]YSVLQSSVSEDFK	0.9998	EGFSANYSVLQSSVSEDFK	NRP1_HUMAN	EGFSANYSVLQSSVSEDFK	C
GPECSQN[115]YTTPSGVIK	0.9998	GPECSQNYTTPSGVIK	NRP1_HUMAN	GPECSQNYTTPSGVIK	S
IGYSNN[115]GSDWK	0.9998	IGYSNNGSDWK	NRP1_HUMAN	IGYSNNGSDWK	M
HAN[115]WTLTPLK	0.9998	HANWTLTPLK	PON1_HUMAN	HANWTLTPLK	S
VTQVYAEN[115]GTVLQGSTVASVYK	0.9998	VTQVYAENGTVLQGSTVASVYK	PON1_HUMAN	VTQVYAENGTVLQGSTVASVYK	G
LHEITN[115]ETFR	0.9998	LHEITNETFR	VASN_HUMAN	LHEITNETFR	G
DASSFLAEWQN[115]ITK	0.9998	DASSFLAEWQNITK	4F2_HUMAN	DASSFLAEWQNITK	G
SLVTQYLN[115]ATGNR	0.9998	SLVTQYLNATGNR	4F2_HUMAN	SLVTQYLNATGNR	W
VLSLPLN[115]SSAVVN[115]CSVHGLPTPALR	0.9998	VLSLPLNSSAVVNCSVHGLPTPALR	BCAM_HUMAN	VLSLPLNSSAVVNCSVHGLPTPALR	W
GQPAN[115]QSVLLSIYDER	0.9998	GQPANQSVLLSIYDER	CO5A3_HUMAN	GQPANQSVLLSIYDER	G
VYCN[115]FTSGGETCIYPDK	0.9998	VYCNFTSGGETCIYPDK	COBA1_HUMAN	VYCNFTSGGETCIYPDK	K
APQHVVNHLPPYTN[115]VSLK	0.9998	APQHVVNHLPPYTNVSLK	PTPRK_HUMAN	APQHVVNHLPPYTNVSLK	M
M[147]DPPCTN[115]TTAASTYLNNPYVR	0.9998	MDPPCTNTTAASTYLNNPYVR	PPGB_HUMAN	MDPPCTNTTAASTYLNNPYVR	K
LFQN[115]CSELFK	0.9998	LFQNCSELFK	TM87A_HUMAN	LFQNCSELFK	T
EHEAQSN[115]ASLDVFLGHTNVEELMK	0.9998	EHEAQSNASLDVFLGHTNVEELMK	C1R_HUMAN	EHEAQSNASLDVFLGHTNVEELMK	L
EHEAQSN[115]ASLDVFLGHTNVEELM[147]K	0.9998	EHEAQSNASLDVFLGHTNVEELMK	C1R_HUMAN	EHEAQSNASLDVFLGHTNVEELMK	L
EEQFN[115]STYR	0.9998	EEQFNSTYR	IGHG4_HUMAN	EEQFNSTYR	V
LTQVPDDLPTN[115]ITVLN[115]LTHNQLR	0.9998	LTQVPDDLPTNITVLNLTHNQLR	TLR3_HUMAN	LTQVPDDLPTNITVLNLTHNQLR	R
LDLPVN[115]TSIPN[115]VTEVK	0.9998	LDLPVNTSIPNVTEVK	ITA1_HUMAN	LDLPVNTSIPNVTEVK	E
VYVYALN[115]QTR	0.9998	VYVYALNQTR	ITA1_HUMAN	VYVYALNQTR	F
YN[115]HTGQVIIYR	0.9998	YNHTGQVIIYR	ITA1_HUMAN	YNHTGQVIIYR	M
GELN[115]TSIFSSR	0.9998	GELNTSIFSSR	PCYOX_HUMAN	GELNTSIFSSR	P
LLHALGGDDFLGM[147]LN[115]R	0.9998	LLHALGGDDFLGMLNR	PCYOX_HUMAN	LLHALGGDDFLGMLNR	T
DLESVPPGFPAN[115]VTTLSLSANR	0.9998	DLESVPPGFPANVTTLSLSANR	ISLR_HUMAN	DLESVPPGFPANVTTLSLSANR	L
FQAFAN[115]GSLLIPDFGK	0.9998	FQAFANGSLLIPDFGK	ISLR_HUMAN	FQAFANGSLLIPDFGK	L
AN[115]QTYTSVAR	0.9998	ANQTYTSVAR	TENX_HUMAN	ANQTYTSVAR	H
GPN[115]LTSPASITFTTGLEAPR	0.9998	GPNLTSPASITFTTGLEAPR	TENX_HUMAN	GPNLTSPASITFTTGLEAPR	D
LVQLFPN[115]DTSLK	0.9998	LVQLFPNDTSLK	ASPH_HUMAN	LVQLFPNDTSLK	N
ELYLQNNYLTDEGLDN[115]ETFWK	0.9998	ELYLQNNYLTDEGLDNETFWK	PODN_HUMAN	ELYLQNNYLTDEGLDNETFWK	L
LSSLEYLDLSSNN[115]LSR	0.9998	LSSLEYLDLSSNNLSR	PODN_HUMAN	LSSLEYLDLSSNNLSR	V
VWDTAVGLN[115]HTAEPSLQTLER	0.9998	VWDTAVGLNHTAEPSLQTLER	TTYH3_HUMAN	VWDTAVGLNHTAEPSLQTLER	Q
VQEVLN[115]GTEVNLQHLTALVDCR	0.9998	VQEVLNGTEVNLQHLTALVDCR	TTYH3_HUMAN	VQEVLNGTEVNLQHLTALVDCR	S
IGGIWTWVGTN[115]K	0.9998	IGGIWTWVGTNK	LYAM1_HUMAN	IGGIWTWVGTNK	S
LTQGICLEQN[115]K	0.9998	LTQGICLEQNK	CD34_HUMAN	LTQGICLEQNK	T
IYN[115]WSGYPLLVQK	0.9998	IYNWSGYPLLVQK	PLBL1_HUMAN	IYNWSGYPLLVQK	L
GEN[115]FTETDVK	0.9998	GENFTETDVK	PRIO_HUMAN	GENFTETDVK	M
AQPGTMSN[115]GTETR	0.9998	AQPGTMSNGTETR	SUSD2_HUMAN	AQPGTMSNGTETR	G
VVM[147]DIPYELWN[115]ETSAEVADLK	0.9998	VVMDIPYELWNETSAEVADLK	CNPY3_HUMAN	VVMDIPYELWNETSAEVADLK	K
M[147]SVCTDN[115]VTDLR	0.9998	MSVCTDNVTDLR	K1324_HUMAN	MSVCTDNVTDLR	I
FDEWDELPHGFASLSANM[147]ELDDSAAESTGN[115]CTSSK	0.9998	FDEWDELPHGFASLSANMELDDSAAESTGNCTSSK	K1324_HUMAN	FDEWDELPHGFASLSANMELDDSAAESTGNCTSSK	W
EAIN[115]ITLDHK	0.9998	EAINITLDHK	PLOD2_HUMAN	EAINITLDHK	C
YFN[115]YTVK	0.9998	YFNYTVK	PLOD2_HUMAN	YFNYTVK	V
YN[115]CSIESPR	0.9998	YNCSIESPR	PLOD2_HUMAN	YNCSIESPR	K
VLHN[115]GTLAELQGLPHIR	0.9998	VLHNGTLAELQGLPHIR	TPBG_HUMAN	VLHNGTLAELQGLPHIR	V
FN[115]NSNLCSQSLAAR	0.9998	FNNSNLCSQSLAAR	CD6_HUMAN	FNNSNLCSQSLAAR	V
LTN[115]GSSSCSGTVEVR	0.9998	LTNGSSSCSGTVEVR	CD6_HUMAN	LTNGSSSCSGTVEVR	L
GPYTLQGLLGCELGPDN[115]TSVPTAK	0.9998	GPYTLQGLLGCELGPDNTSVPTAK	FCGRN_HUMAN	GPYTLQGLLGCELGPDNTSVPTAK	F
ADDCALPYLGAICYCDLFCN[115]R	0.9998	ADDCALPYLGAICYCDLFCNR	TINAL_HUMAN	ADDCALPYLGAICYCDLFCNR	T
AINQGNYGWQAGN[115]HSAFWGM[147]TLDEGIR	0.9998	AINQGNYGWQAGNHSAFWGMTLDEGIR	TINAL_HUMAN	AINQGNYGWQAGNHSAFWGMTLDEGIR	Y
GSEGGN[115]GSNPVAGLETDDHGGK	0.9998	GSEGGNGSNPVAGLETDDHGGK	F174A_HUMAN	GSEGGNGSNPVAGLETDDHGGK	A
AFGSNPN[115]LTK	0.9998	AFGSNPNLTK	CPN2_HUMAN	AFGSNPNLTK	V
LYLGSNN[115]LTALHPALFQN[115]LSK	0.9998	LYLGSNNLTALHPALFQNLSK	CPN2_HUMAN	LYLGSNNLTALHPALFQNLSK	L
M[147]N[115]ASFSLK	0.9998	MNASFSLK	ENPP1_HUMAN	MNASFSLK	S
M[147]YN[115]GSVPFEER	0.9998	MYNGSVPFEER	ENPP1_HUMAN	MYNGSVPFEER	I
LDPTVLDAGELAN[115]R	0.9998	LDPTVLDAGELANR	CSPG4_HUMAN	LDPTVLDAGELANR	T
AGQPATAFSQQDLLDGAVLYSHN[115]GSLSPR	0.9998	AGQPATAFSQQDLLDGAVLYSHNGSLSPR	CSPG4_HUMAN	AGQPATAFSQQDLLDGAVLYSHNGSLSPR	D
MN[115]LTVM[147]CPSIDPLHYHHLTYIR	0.9998	MNLTVMCPSIDPLHYHHLTYIR	OMD_HUMAN	MNLTVMCPSIDPLHYHHLTYIR	V
M[147]N[115]LTVM[147]CPSIDPLHYHHLTYIR	0.9998	MNLTVMCPSIDPLHYHHLTYIR	OMD_HUMAN	MNLTVMCPSIDPLHYHHLTYIR	V
EACQGTSPPVVSCYN[115]ASDHVYK	0.9998	EACQGTSPPVVSCYNASDHVYK	LYPD3_HUMAN	EACQGTSPPVVSCYNASDHVYK	G
GCFDGN[115]VTLTAAN[115]VTVSLPVR	0.9998	GCFDGNVTLTAANVTVSLPVR	LYPD3_HUMAN	GCFDGNVTLTAANVTVSLPVR	G
ALDPAGN[115]ESAYPPNGVECYSCVGLSR	0.9998	ALDPAGNESAYPPNGVECYSCVGLSR	LYPD3_HUMAN	ALDPAGNESAYPPNGVECYSCVGLSR	E
M[147]SVINFECN[115]K	0.9998	MSVINFECNK	MPRI_HUMAN	MSVINFECNK	T
YECHFFN[115]GTER	0.9998	YECHFFNGTER	DRB5_HUMAN	YECHFFNGTER	V
GVTNDLLSIQGNTGPSWIN[115]K	0.9998	GVTNDLLSIQGNTGPSWINK	KDEL2_HUMAN	GVTNDLLSIQGNTGPSWINK	T
YFYLQAVNSEGQN[115]LTR	0.9998	YFYLQAVNSEGQNLTR	KDEL2_HUMAN	YFYLQAVNSEGQNLTR	S
GNPYSDLGN[115]HTTCR	0.9998	GNPYSDLGNHTTCR	ANO6_HUMAN	GNPYSDLGNHTTCR	Y
LN[115]ITCESSK	0.9998	LNITCESSK	ANO6_HUMAN	LNITCESSK	K
NIN[115]GTDPIQK	0.9998	NINGTDPIQK	ANO6_HUMAN	NINGTDPIQK	Y
TLLN[115]ASCDNM[147]LM[147]GIK	0.9998	TLLNASCDNMLMGIK	OLFL1_HUMAN	TLLNASCDNMLMGIK	S
ALSQQN[115]VSM[147]DLATFM[147]K	0.9998	ALSQQNVSMDLATFMK	MSLN_HUMAN	ALSQQNVSMDLATFMK	L
LAFQNM[147]N[115]GSEYFVK	0.9998	LAFQNMNGSEYFVK	MSLN_HUMAN	LAFQNMNGSEYFVK	I
WN[115]VTSLETLK	0.9998	WNVTSLETLK	MSLN_HUMAN	WNVTSLETLK	A
AM[147]SSN[115]ETAAYK	0.9998	AMSSNETAAYK	STT3B_HUMAN	AMSSNETAAYK	I
VM[147]SWWDYGYQIAGM[147]AN[115]R	0.9998	VMSWWDYGYQIAGMANR	STT3B_HUMAN	VMSWWDYGYQIAGMANR	T
DCVLQCEEQN[115]CSGGALNHFR	0.9998	DCVLQCEEQNCSGGALNHFR	PGAP3_HUMAN	DCVLQCEEQNCSGGALNHFR	S
ETN[115]FSLASGLEAK	0.9998	ETNFSLASGLEAK	GFRA1_HUMAN	ETNFSLASGLEAK	D
GNVAVTVSGHTCQHWSAQTPHTHN[115]R	0.9998	GNVAVTVSGHTCQHWSAQTPHTHNR	PLMN_HUMAN	GNVAVTVSGHTCQHWSAQTPHTHNR	T
GLCVLSVGAN[115]LTTFDGAR	0.9998	GLCVLSVGANLTTFDGAR	FCGBP_HUMAN	GLCVLSVGANLTTFDGAR	G
YLPVN[115]SSLLTSDCSER	0.9998	YLPVNSSLLTSDCSER	FCGBP_HUMAN	YLPVNSSLLTSDCSER	C
EQQLESCACN[115]ETDNSCK	0.9998	EQQLESCACNETDNSCK	ADA17_HUMAN	EQQLESCACNETDNSCK	V
ESWGQESNAGN[115]QTVVR	0.9998	ESWGQESNAGNQTVVR	B3GN2_HUMAN	ESWGQESNAGNQTVVR	V
LSN[115]ISHLNYCEPDLR	0.9998	LSNISHLNYCEPDLR	B3GN2_HUMAN	LSNISHLNYCEPDLR	V
DYGSQEDFTQVWN[115]TTMK	0.9998	DYGSQEDFTQVWNTTMK	TSN1_HUMAN	DYGSQEDFTQVWNTTMK	G
DYGSQEDFTQVWN[115]TTM[147]K	0.9998	DYGSQEDFTQVWNTTMK	TSN1_HUMAN	DYGSQEDFTQVWNTTMK	G
YPQDYQFYIQN[115]FTALPLNTVVPPQR	0.9998	YPQDYQFYIQNFTALPLNTVVPPQR	SSRA_HUMAN	YPQDYQFYIQNFTALPLNTVVPPQR	Q
DN[115]HTHSDIQVK	0.9998	DNHTHSDIQVK	PLD3_HUMAN	DNHTHSDIQVK	L
ELGVVM[147]YN[115]CSCLAR	0.9998	ELGVVMYNCSCLAR	PLD3_HUMAN	ELGVVMYNCSCLAR	D
DLEITN[115]ATLQSEEDSR	0.9998	DLEITNATLQSEEDSR	ERAP2_HUMAN	DLEITNATLQSEEDSR	Y
LQN[115]LTLPTN[115]ASIK	0.9998	LQNLTLPTNASIK	MMRN1_HUMAN	LQNLTLPTNASIK	F
TFYWDFYTN[115]R	0.9998	TFYWDFYTNR	PIP_HUMAN	TFYWDFYTNR	T
LGIYADVGN[115]K	0.9998	LGIYADVGNK	AGAL_HUMAN	LGIYADVGNK	T
DPN[115]CSSILQTEER	0.9998	DPNCSSILQTEER	GP2_HUMAN	DPNCSSILQTEER	N
DGYEPCVNEGM[147]CVTYHN[115]GTGYCK	0.9998	DGYEPCVNEGMCVTYHNGTGYCK	NOTC2_HUMAN	DGYEPCVNEGMCVTYHNGTGYCK	C
ALSCN[115]VSSPIFK	0.9998	ALSCNVSSPIFK	ITAL_HUMAN	ALSCNVSSPIFK	A
DVM[147]QVAN[115]TTM[147]SSR	0.9998	DVMQVANTTMSSR	IGF1R_HUMAN	DVMQVANTTMSSR	S
ACTENNECCHPECLGSCSAPDN[115]DTACVACR	0.9998	ACTENNECCHPECLGSCSAPDNDTACVACR	IGF1R_HUMAN	ACTENNECCHPECLGSCSAPDNDTACVACR	H
LN[115]WTSLLPASFTK	0.9998	LNWTSLLPASFTK	NCEH1_HUMAN	LNWTSLLPASFTK	N
GNYDFVQAM[147]IVNN[115]HTSLDVEEAAAVR	0.9998	GNYDFVQAMIVNNHTSLDVEEAAAVR	NCEH1_HUMAN	GNYDFVQAMIVNNHTSLDVEEAAAVR	A
IYGPFCECDN[115]FSCAR	0.9998	IYGPFCECDNFSCAR	ITB5_HUMAN	IYGPFCECDNFSCAR	N
DCVECLLLHSGKPDN[115]QTCHSLCR	0.9998	DCVECLLLHSGKPDNQTCHSLCR	ITB5_HUMAN	DCVECLLLHSGKPDNQTCHSLCR	D
ELGDN[115]VSM[147]ILVPFK	0.9998	ELGDNVSMILVPFK	SIA4A_HUMAN	ELGDNVSMILVPFK	T
KPNNLN[115]DTIK	0.9998	KPNNLNDTIK	SIA4A_HUMAN	KPNNLNDTIK	E
FN[115]QTM[147]QPLLTAQNALLEDDTYR	0.9998	FNQTMQPLLTAQNALLEDDTYR	SIA4A_HUMAN	FNQTMQPLLTAQNALLEDDTYR	W
LN[115]STHCQDINECAM[147]PGVCR	0.9998	LNSTHCQDINECAMPGVCR	LTBP3_HUMAN	LNSTHCQDINECAMPGVCR	H
NNVITLN[115]ITGK	0.9998	NNVITLNITGK	BGAL_HUMAN	NNVITLNITGK	A
VAYSNDSAN[115]WTEYQDPR	0.9998	VAYSNDSANWTEYQDPR	MFGM_HUMAN	VAYSNDSANWTEYQDPR	T
VAYSN[115]DSANWTEYQDPR	0.9998	VAYSNDSANWTEYQDPR	MFGM_HUMAN	VAYSNDSANWTEYQDPR	T
GCN[115]DSDVLAVAGFALR	0.9998	GCNDSDVLAVAGFALR	FETUB_HUMAN	GCNDSDVLAVAGFALR	D
ASVSFLNFN[115]LSNCER	0.9998	ASVSFLNFNLSNCER	CDCP1_HUMAN	ASVSFLNFNLSNCER	K
GLPSLTSVSWN[115]ISVPR	0.9998	GLPSLTSVSWNISVPR	CDCP1_HUMAN	GLPSLTSVSWNISVPR	D
IGTFCSN[115]GTVSR	0.9998	IGTFCSNGTVSR	CDCP1_HUMAN	IGTFCSNGTVSR	I
AAEN[115]FTLLVK	0.9998	AAENFTLLVK	P2RX4_HUMAN	AAENFTLLVK	N
M[147]N[115]DTIFGFTM[147]EER	0.9998	MNDTIFGFTMEER	TCO1_HUMAN	MNDTIFGFTMEER	S
VAN[115]LTEPVVLTFQHQLQPK	0.9998	VANLTEPVVLTFQHQLQPK	GPR56_HUMAN	VANLTEPVVLTFQHQLQPK	N
LGIYADM[147]GN[115]FTCM[147]GYPGTTLDK	0.9998	LGIYADMGNFTCMGYPGTTLDK	NAGAB_HUMAN	LGIYADMGNFTCMGYPGTTLDK	V
VN[115]YSLLADICNLWR	0.9998	VNYSLLADICNLWR	NAGAB_HUMAN	VNYSLLADICNLWR	N
HLVN[115]ISVYAFN[115]K	0.9998	HLVNISVYAFNK	CA2D1_HUMAN	HLVNISVYAFNK	S
IDVNSWIEN[115]FTK	0.9998	IDVNSWIENFTK	CA2D1_HUMAN	IDVNSWIENFTK	T
M[147]AWPEDHVFISTPSFN[115]YTGR	0.9998	MAWPEDHVFISTPSFNYTGR	LCAT_HUMAN	MAWPEDHVFISTPSFNYTGR	D
ADANPPATEYHWTTLN[115]GSLPK	0.9998	ADANPPATEYHWTTLNGSLPK	PVRL1_HUMAN	ADANPPATEYHWTTLNGSLPK	G
AN[115]LTTLAGTHTNIPK	0.9998	ANLTTLAGTHTNIPK	DPEP1_HUMAN	ANLTTLAGTHTNIPK	L
YHQPGHEAVTSAVDQLQQEFHCCGSN[115]NSQDWR	0.9998	YHQPGHEAVTSAVDQLQQEFHCCGSNNSQDWR	CD151_HUMAN	YHQPGHEAVTSAVDQLQQEFHCCGSNNSQDWR	D
LEHSSSLPAN[115]VTGFNLIHR	0.9998	LEHSSSLPANVTGFNLIHR	COGA1_HUMAN	LEHSSSLPANVTGFNLIHR	L
EEAM[147]LYHN[115]QTAELR	0.9998	EEAMLYHNQTAELR	SC65_HUMAN	EEAMLYHNQTAELR	E
DSEAFCHAN[115]CSGPAPAAKPDPDGGR	0.9998	DSEAFCHANCSGPAPAAKPDPDGGR	SC65_HUMAN	DSEAFCHANCSGPAPAAKPDPDGGR	A
EIFVAN[115]GTQGK	0.9998	EIFVANGTQGK	MPZL1_HUMAN	EIFVANGTQGK	L
DASINIENM[147]QFIHN[115]GTYICDVK	0.9998	DASINIENMQFIHNGTYICDVK	MPZL1_HUMAN	DASINIENMQFIHNGTYICDVK	N
IQN[115]SSCTSLEHCFR	0.9998	IQNSSCTSLEHCFR	CD5_HUMAN	IQNSSCTSLEHCFR	K
LNN[115]ITIIGPLDM[147]K	0.9998	LNNITIIGPLDMK	T106B_HUMAN	LNNITIIGPLDMK	Q
VIVEGQNAHGEGYVN[115]VTVKPEPR	0.9998	VIVEGQNAHGEGYVNVTVKPEPR	K319L_HUMAN	VIVEGQNAHGEGYVNVTVKPEPR	K
LASPPSQGEVPPGPLPEAVLALYN[115]STR	0.9998	LASPPSQGEVPPGPLPEAVLALYNSTR	TGFB1_HUMAN	LASPPSQGEVPPGPLPEAVLALYNSTR	D
NN[115]ITSSGIGPK	0.9998	NNITSSGIGPK	ECM2_HUMAN	NNITSSGIGPK	A
GCM[147]AN[115]VTVTR	0.9998	GCMANVTVTR	MUC6_HUMAN	GCMANVTVTR	C
DIGN[115]YSCAAQGTQTGSK	0.9998	DIGNYSCAAQGTQTGSK	CELR1_HUMAN	DIGNYSCAAQGTQTGSK	K
NVDM[147]AGFIANN[115]GTR	0.9998	NVDMAGFIANNGTR	CELR1_HUMAN	NVDMAGFIANNGTR	E
FFGLN[115]VTGKPNEETLDM[147]M[147]K	0.9998	FFGLNVTGKPNEETLDMMK	MMP8_HUMAN	FFGLNVTGKPNEETLDMMK	K
LPEM[147]AQPVDPAHN[115]VSR	0.9998	LPEMAQPVDPAHNVSR	ANGL4_HUMAN	LPEMAQPVDPAHNVSR	L
WFSAGLASN[115]SSWLR	0.9998	WFSAGLASNSSWLR	PTGDS_HUMAN	WFSAGLASNSSWLR	E
SN[115]STAATNEVPEVTVFSK	0.9998	SNSTAATNEVPEVTVFSK	DQA1_HUMAN	SNSTAATNEVPEVTVFSK	S
GANSDLPEEVTVLVN[115]K	0.9998	GANSDLPEEVTVLVNK	HMCN1_HUMAN	GANSDLPEEVTVLVNK	S
SPEN[115]ISVVEK	0.9998	SPENISVVEK	HMCN1_HUMAN	SPENISVVEK	N
M[147]TPNLLHLAPENFYISHSPN[115]STAGPSCTLLEEAFR	0.9998	MTPNLLHLAPENFYISHSPNSTAGPSCTLLEEAFR	HEXB_HUMAN	MTPNLLHLAPENFYISHSPNSTAGPSCTLLEEAFR	R
GSPGN[115]GSSHSGAPGPDPTLAR	0.9998	GSPGNGSSHSGAPGPDPTLAR	MXRA8_HUMAN	GSPGNGSSHSGAPGPDPTLAR	G
YN[115]QSEAGSHTLQGM[147]NGCDM[147]GPDGR	0.9998	YNQSEAGSHTLQGMNGCDMGPDGR	HLAF_HUMAN	YNQSEAGSHTLQGMNGCDMGPDGR	L
DYLTDLITN[115]DSVSFFR	0.9998	DYLTDLITNDSVSFFR	SULF2_HUMAN	DYLTDLITNDSVSFFR	T
FYN[115]YTLCR	0.9998	FYNYTLCR	SULF2_HUMAN	FYNYTLCR	N
LFPN[115]ASQHITPSYNYAPNPDK	0.9998	LFPNASQHITPSYNYAPNPDK	SULF2_HUMAN	LFPNASQHITPSYNYAPNPDK	H
AM[147]SGINN[115]YTQHCK	0.9998	AMSGINNYTQHCK	RNAS6_HUMAN	AMSGINNYTQHCK	H
LDN[115]YSTQELGK	0.9998	LDNYSTQELGK	5NTD_HUMAN	LDNYSTQELGK	T
GNVISSHGNPILLN[115]SSIPEDPSIK	0.9998	GNVISSHGNPILLNSSIPEDPSIK	5NTD_HUMAN	GNVISSHGNPILLNSSIPEDPSIK	A
LQN[115]ETAANEVLESIQSYFK	0.9998	LQNETAANEVLESIQSYFK	ENTP3_HUMAN	LQNETAANEVLESIQSYFK	S
LCLNN[115]DTK	0.9998	LCLNNDTK	CTR1_HUMAN	LCLNNDTK	E
NWQLTEEDFGN[115]TSGR	0.9998	NWQLTEEDFGNTSGR	CTR1_HUMAN	NWQLTEEDFGNTSGR	L
LPAVWSITTLN[115]ATSALLR	0.9998	LPAVWSITTLNATSALLR	DSG3_HUMAN	LPAVWSITTLNATSALLR	A
HN[115]FTASLLTLR	0.9998	HNFTASLLTLR	T132A_HUMAN	HNFTASLLTLR	I
VQQVGHYPPAN[115]SSLSSR	0.9998	VQQVGHYPPANSSLSSR	T132A_HUMAN	VQQVGHYPPANSSLSSR	S
AAGN[115]TSESQSCAR	0.9998	AAGNTSESQSCAR	OSTM1_HUMAN	AAGNTSESQSCAR	S
ELLLDFAN[115]SSAELTGCLVR	0.9998	ELLLDFANSSAELTGCLVR	OSTM1_HUMAN	ELLLDFANSSAELTGCLVR	S
AEPGTHLCIDVEDAM[147]N[115]ITR	0.9998	AEPGTHLCIDVEDAMNITR	OSTM1_HUMAN	AEPGTHLCIDVEDAMNITR	K
APDSN[115]CSNLLITTR	0.9998	APDSNCSNLLITTR	K1467_HUMAN	APDSNCSNLLITTR	Q
M[147]LSAFN[115]ATSGK	0.9998	MLSAFNATSGK	K1467_HUMAN	MLSAFNATSGK	A
DSLSIN[115]ATNIK	0.9998	DSLSINATNIK	EGFR_HUMAN	DSLSINATNIK	H
EAFVTGCIN[115]ATQAANQGEFQKPDNK	0.9998	EAFVTGCINATQAANQGEFQKPDNK	PRND_HUMAN	EAFVTGCINATQAANQGEFQKPDNK	L
SN[115]HTQATNDPPEVTVFPK	0.9998	SNHTQATNDPPEVTVFPK	DPA1_HUMAN	SNHTQATNDPPEVTVFPK	E
VFIVPVGN[115]HSNIPFSR	0.9998	VFIVPVGNHSNIPFSR	PLD4_HUMAN	VFIVPVGNHSNIPFSR	V
IHVAGETDSSNLN[115]VSEPR	0.9998	IHVAGETDSSNLNVSEPR	PTPRJ_HUMAN	IHVAGETDSSNLNVSEPR	A
VSDN[115]ESSSN[115]YTYK	0.9998	VSDNESSSNYTYK	PTPRJ_HUMAN	VSDNESSSNYTYK	I
YN[115]ATVYSQAAN[115]GTEGQPQAIEFR	0.9998	YNATVYSQAANGTEGQPQAIEFR	PTPRJ_HUMAN	YNATVYSQAANGTEGQPQAIEFR	T
LN[115]ASLPALLLIR	0.9998	LNASLPALLLIR	VAS1_HUMAN	LNASLPALLLIR	L
NTCTTGITDPPPPDGSPN[115]ITSVSHNSVK	0.9998	NTCTTGITDPPPPDGSPNITSVSHNSVK	PTPRJ_HUMAN	NTCTTGITDPPPPDGSPNITSVSHNSVK	V
NYHQPAILN[115]SSALR	0.9998	NYHQPAILNSSALR	QPCT_HUMAN	NYHQPAILNSSALR	Q
YFQN[115]YSYGGVIQDDHIPFLR	0.9998	YFQNYSYGGVIQDDHIPFLR	QPCT_HUMAN	YFQNYSYGGVIQDDHIPFLR	R
NYFHYN[115]QSYPPTYNVK	0.9998	NYFHYNQSYPPTYNVK	LICH_HUMAN	NYFHYNQSYPPTYNVK	D
VLTLNLDQVDFQHAGN[115]YSCVASNVQGK	0.9998	VLTLNLDQVDFQHAGNYSCVASNVQGK	CSF1R_HUMAN	VLTLNLDQVDFQHAGNYSCVASNVQGK	H
VTVQSLLTVETLEHN[115]QTYECR	0.9998	VTVQSLLTVETLEHNQTYECR	CSF1R_HUMAN	VTVQSLLTVETLEHNQTYECR	A
PYSIYPHGVTFSPYEDEVN[115]SSFTSGR	0.9998	PYSIYPHGVTFSPYEDEVNSSFTSGR	FA5_HUMAN	PYSIYPHGVTFSPYEDEVNSSFTSGR	N
HLN[115]ASNPTEPATIIFTAAR	0.9998	HLNASNPTEPATIIFTAAR	TOIP2_HUMAN	HLNASNPTEPATIIFTAAR	E
ALESSAPNLQLETSDVLAN[115]VTYLK	0.9998	ALESSAPNLQLETSDVLANVTYLK	PROM2_HUMAN	ALESSAPNLQLETSDVLANVTYLK	G
EAFN[115]ETNQAIR	0.9998	EAFNETNQAIR	ABCA1_HUMAN	EAFNETNQAIR	T
LQDFLVDN[115]ETFSGFLYHN[115]LSLPK	0.9998	LQDFLVDNETFSGFLYHNLSLPK	ABCA1_HUMAN	LQDFLVDNETFSGFLYHNLSLPK	S
VFLQGYQLHLTSLCN[115]GSK	0.9998	VFLQGYQLHLTSLCNGSK	ABCA1_HUMAN	VFLQGYQLHLTSLCNGSK	S
YYTNNFITN[115]LTFR	0.9998	YYTNNFITNLTFR	CLCA2_HUMAN	YYTNNFITNLTFR	T
AEN[115]QTAPGEVPALSNLR	0.9998	AENQTAPGEVPALSNLR	LYOX_HUMAN	AENQTAPGEVPALSNLR	P
DPGAAVPGAAN[115]ASAQQPR	0.9998	DPGAAVPGAANASAQQPR	LYOX_HUMAN	DPGAAVPGAANASAQQPR	T
LSLPGFEN[115]LTAGYNK	0.9998	LSLPGFENLTAGYNK	GBRP_HUMAN	LSLPGFENLTAGYNK	F
GISYYIGAQSN[115]FTK	0.9998	GISYYIGAQSNFTK	S6A14_HUMAN	GISYYIGAQSNFTK	L
VEDEGN[115]YTCLFVTFPQGSR	0.9998	VEDEGNYTCLFVTFPQGSR	PVR_HUMAN	VEDEGNYTCLFVTFPQGSR	S
PVDKPIN[115]TTLICN[115]VTNALGAR	0.9998	PVDKPINTTLICNVTNALGAR	PVR_HUMAN	PVDKPINTTLICNVTNALGAR	Q
HTGNVVITN[115]CSAAHSR	0.9998	HTGNVVITNCSAAHSR	LFNG_HUMAN	HTGNVVITNCSAAHSR	Q
M[147]SIQGCVAQPSSFLLN[115]HTR	0.9998	MSIQGCVAQPSSFLLNHTR	CD177_HUMAN	MSIQGCVAQPSSFLLNHTR	Q
IYEM[147]N[115]VSTSYISVR	0.9998	IYEMNVSTSYISVR	ATS16_HUMAN	IYEMNVSTSYISVR	N
VSACPPSWSVGN[115]WSACSR	0.9998	VSACPPSWSVGNWSACSR	ATS16_HUMAN	VSACPPSWSVGNWSACSR	T
LQNN[115]ISYQM[147]ADIHHLK	0.9998	LQNNISYQMADIHHLK	CASC4_HUMAN	LQNNISYQMADIHHLK	E
NYEIIQQPM[147]SYDN[115]LTQR	0.9998	NYEIIQQPMSYDNLTQR	STS_HUMAN	NYEIIQQPMSYDNLTQR	L
LAN[115]DTLIYFTSDQGAHVEEVSSK	0.9998	LANDTLIYFTSDQGAHVEEVSSK	STS_HUMAN	LANDTLIYFTSDQGAHVEEVSSK	G
AEIISQVFWLHSCDTN[115]ITTPK	0.9998	AEIISQVFWLHSCDTNITTPK	ABCAC_HUMAN	AEIISQVFWLHSCDTNITTPK	L
VLDCEKPGISCLTAHCN[115]FSALAK	0.9998	VLDCEKPGISCLTAHCNFSALAK	ITA9_HUMAN	VLDCEKPGISCLTAHCNFSALAK	E
FGSVLGN[115]YSCAAQGTQGGSK	0.9998	FGSVLGNYSCAAQGTQGGSK	CELR2_HUMAN	FGSVLGNYSCAAQGTQGGSK	K
NGIYN[115]ITVLASDQGGR	0.9998	NGIYNITVLASDQGGR	DSC2_HUMAN	NGIYNITVLASDQGGR	T
FFPYAN[115]GTLGIR	0.9998	FFPYANGTLGIR	L1CAM_HUMAN	FFPYANGTLGIR	D
VPGN[115]QTSTTLK	0.9998	VPGNQTSTTLK	L1CAM_HUMAN	VPGNQTSTTLK	L
GEGN[115]ETTNM[147]VITWKPLR	0.9998	GEGNETTNMVITWKPLR	L1CAM_HUMAN	GEGNETTNMVITWKPLR	W
LFDDWM[147]ASN[115]GTQSLPTDVM[147]TTVFK	0.9998	LFDDWMASNGTQSLPTDVMTTVFK	LCAP_HUMAN	LFDDWMASNGTQSLPTDVMTTVFK	V
YQPIN[115]STHELGPLVDLK	0.9998	YQPINSTHELGPLVDLK	NRCAM_HUMAN	YQPINSTHELGPLVDLK	I
VNVVN[115]STLAEVHWDPVPLK	0.9998	VNVVNSTLAEVHWDPVPLK	NRCAM_HUMAN	VNVVNSTLAEVHWDPVPLK	S
WGHN[115]ITEFQQR	0.9998	WGHNITEFQQR	ERO1A_HUMAN	WGHNITEFQQR	F
AGFEYAFDQLQNSN[115]ITR	0.9998	AGFEYAFDQLQNSNITR	CA2D2_HUMAN	AGFEYAFDQLQNSNITR	A
VN[115]YSYAAVQIPTDIYK	0.9998	VNYSYAAVQIPTDIYK	CA2D2_HUMAN	VNYSYAAVQIPTDIYK	G
GWN[115]WTSGFNK	0.9998	GWNWTSGFNK	FOLR1_HUMAN	GWNWTSGFNK	C
HN[115]LTITQGK	0.9998	HNLTITQGK	INSR_HUMAN	HNLTITQGK	L
IPQGTFSNLEN[115]LTLLDLQNNK	0.9998	IPQGTFSNLENLTLLDLQNNK	KERA_HUMAN	IPQGTFSNLENLTLLDLQNNK	L
ETIYPN[115]ASLLM[147]R	0.9998	ETIYPNASLLMR	CEAM8_HUMAN	ETIYPNASLLMR	N
VVTQN[115]SSSGN[115]VTHEK	0.9998	VVTQNSSSGNVTHEK	SATT_HUMAN	VVTQNSSSGNVTHEK	I
M[147]EDGLLTCHGPGPDN[115]CTK	0.9998	MEDGLLTCHGPGPDNCTK	ERBB4_HUMAN	MEDGLLTCHGPGPDNCTK	C
AGAFLGLTNVAVM[147]N[115]LSGNCLR	0.9998	AGAFLGLTNVAVMNLSGNCLR	ALS_HUMAN	AGAFLGLTNVAVMNLSGNCLR	N
NFPDAFEYNN[115]VSR	0.9998	NFPDAFEYNNVSR	CBPM_HUMAN	NFPDAFEYNNVSR	Q
GAN[115]DSTSAMPEQM[147]K	0.9998	GANDSTSAMPEQMK	PRS23_HUMAN	GANDSTSAMPEQMK	F
GAN[115]DSTSAM[147]PEQM[147]K	0.9998	GANDSTSAMPEQMK	PRS23_HUMAN	GANDSTSAMPEQMK	F
VPYNVGPGFTGN[115]FSTQK	0.9998	VPYNVGPGFTGNFSTQK	FOLH1_HUMAN	VPYNVGPGFTGNFSTQK	V
FLYN[115]FTQIPHLAGTEQNFQLAK	0.9998	FLYNFTQIPHLAGTEQNFQLAK	FOLH1_HUMAN	FLYNFTQIPHLAGTEQNFQLAK	Q
GIGN[115]YSCSYR	0.9998	GIGNYSCSYR	IGSF1_HUMAN	GIGNYSCSYR	L
YAAVN[115]ITTNQAAPSEVPTLR	0.9998	YAAVNITTNQAAPSEVPTLR	EPHB3_HUMAN	YAAVNITTNQAAPSEVPTLR	L
LTVN[115]LTNDR	0.9998	LTVNLTNDR	IL6RB_HUMAN	LTVNLTNDR	Y
VKPNPPHN[115]LSVINSEELSSILK	0.9998	VKPNPPHNLSVINSEELSSILK	IL6RB_HUMAN	VKPNPPHNLSVINSEELSSILK	L
VPAELN[115]GSM[147]YR	0.9998	VPAELNGSMYR	IGS21_HUMAN	VPAELNGSMYR	C
WCPQDSSCVN[115]ATACR	0.9998	WCPQDSSCVNATACR	EMR2_HUMAN	WCPQDSSCVNATACR	C
VIDGTPCDQN[115]GTAICVSGQCK	0.9998	VIDGTPCDQNGTAICVSGQCK	THSD4_HUMAN	VIDGTPCDQNGTAICVSGQCK	S
FAFQN[115]LTQLR	0.9998	FAFQNLTQLR	TLR8_HUMAN	FAFQNLTQLR	Y
WVEN[115]NTNNLVK	0.9998	WVENNTNNLVK	NEUS_HUMAN	WVENNTNNLVK	D
NCGVN[115]CSGDVFTALIGEIASPNYPKPYPENSR	0.9998	NCGVNCSGDVFTALIGEIASPNYPKPYPENSR	C1S_HUMAN	NCGVNCSGDVFTALIGEIASPNYPKPYPENSR	C
AAN[115]YTSSLNLPDK	0.9998	AANYTSSLNLPDK	SEM4D_HUMAN	AANYTSSLNLPDK	T
VLQPLSATSLYVCGTNAFQPACDHLN[115]LTSFK	0.9998	VLQPLSATSLYVCGTNAFQPACDHLNLTSFK	SEM4D_HUMAN	VLQPLSATSLYVCGTNAFQPACDHLNLTSFK	F
WSDIWN[115]ATK	0.9998	WSDIWNATK	CHLE_HUMAN	WSDIWNATK	Y
FHDVSESTHWTPFLN[115]ASVHYIR	0.9998	FHDVSESTHWTPFLNASVHYIR	PHLD_HUMAN	FHDVSESTHWTPFLNASVHYIR	E
LWLPVN[115]LTWADLEDR	0.9998	LWLPVNLTWADLEDR	CERS2_HUMAN	LWLPVNLTWADLEDR	D
DFTQLHQN[115]ATLELK	0.9998	DFTQLHQNATLELK	LAMA1_HUMAN	DFTQLHQNATLELK	A
DVAGLSQELLN[115]TSASLSR	0.9998	DVAGLSQELLNTSASLSR	LAMA1_HUMAN	DVAGLSQELLNTSASLSR	V
HQVSIN[115]NTAVM[147]QR	0.9998	HQVSINNTAVMQR	LAMA1_HUMAN	HQVSINNTAVMQR	L
EQSTLAQM[147]YPLQEIQN[115]LTVK	0.9998	EQSTLAQMYPLQEIQNLTVK	ACE2_HUMAN	EQSTLAQMYPLQEIQNLTVK	L
LQLQALQQN[115]GSSVLSEDK	0.9998	LQLQALQQNGSSVLSEDK	ACE2_HUMAN	LQLQALQQNGSSVLSEDK	S
DGSIVIHNLDYSDN[115]GTFTCDVK	0.9998	DGSIVIHNLDYSDNGTFTCDVK	MYP0_HUMAN	DGSIVIHNLDYSDNGTFTCDVK	N
VILILDPAISGN[115]ETQPYPAFTR	0.9998	VILILDPAISGNETQPYPAFTR	MGA_HUMAN	VILILDPAISGNETQPYPAFTR	G
ITNENFVDAYENSN[115]STEFVSLASK	0.9998	ITNENFVDAYENSNSTEFVSLASK	ST14_HUMAN	ITNENFVDAYENSNSTEFVSLASK	V
M[147]YM[147]EFPQLYN[115]NSVVCSFLPEVIYK	0.9998	MYMEFPQLYNNSVVCSFLPEVIYK	GDE1_HUMAN	MYMEFPQLYNNSVVCSFLPEVIYK	M
DEDDDCTYSYTM[147]EGDGAPGPN[115]STVLVHK	0.9998	DEDDDCTYSYTMEGDGAPGPNSTVLVHK	ITB4_HUMAN	DEDDDCTYSYTMEGDGAPGPNSTVLVHK	K
IDAYNEAAVSILN[115]SSTR	0.9998	IDAYNEAAVSILNSSTR	CASD1_HUMAN	IDAYNEAAVSILNSSTR	N
DVTALN[115]VSTLK	0.9998	DVTALNVSTLK	MUC4_HUMAN	DVTALNVSTLK	A
GCEACPPN[115]LTGDGR	0.9998	GCEACPPNLTGDGR	MUC4_HUMAN	GCEACPPNLTGDGR	H
VGN[115]SSLEVAGCK	0.9998	VGNSSLEVAGCK	MUC4_HUMAN	VGNSSLEVAGCK	C
IDGGPVILLQAGTPHN[115]LTCR	0.9998	IDGGPVILLQAGTPHNLTCR	KIRR1_HUMAN	IDGGPVILLQAGTPHNLTCR	A
VGSTN[115]VSTLVNVHFAPR	0.9998	VGSTNVSTLVNVHFAPR	KIRR1_HUMAN	VGSTNVSTLVNVHFAPR	I
NAN[115]ISYAFDTHTNTQIVPR	0.9998	NANISYAFDTHTNTQIVPR	OLM2B_HUMAN	NANISYAFDTHTNTQIVPR	L
IQCTLSNPLFN[115]TTSSIILTTCIPSSGHSR	0.9998	IQCTLSNPLFNTTSSIILTTCIPSSGHSR	LFA3_HUMAN	IQCTLSNPLFNTTSSIILTTCIPSSGHSR	H
DATGNVN[115]DTIVTELTN[115]CTSAACK	0.9998	DATGNVNDTIVTELTNCTSAACK	S12A2_HUMAN	DATGNVNDTIVTELTNCTSAACK	L
IFLYSGEPTYLGN[115]ETSVFGPTGN[115]K	0.9998	IFLYSGEPTYLGNETSVFGPTGNK	CLN5_HUMAN	IFLYSGEPTYLGNETSVFGPTGNK	T
ITTLPN[115]VTFLPQN[115]ATTISSR	0.9998	ITTLPNVTFLPQNATTISSR	MUC7_HUMAN	ITTLPNVTFLPQNATTISSR	E
NNIDFPGHN[115]YTTR	0.9998	NNIDFPGHNYTTR	P2RX7_HUMAN	NNIDFPGHNYTTR	N
ELPGVCN[115]ETMM[147]ALWEECKPCLK	0.9997	ELPGVCNETMMALWEECKPCLK	CLUS_HUMAN	ELPGVCNETMMALWEECKPCLK	Q
QLINALQIN[115]NTAVGHALVLPAGR	0.9997	QLINALQINNTAVGHALVLPAGR	CO6A3_HUMAN	QLINALQINNTAVGHALVLPAGR	D
LEHLYLNN[115]NSIEK	0.9997	LEHLYLNNNSIEK	PRELP_HUMAN	LEHLYLNNNSIEK	I
DNDCVDGSDEPAN[115]CTQM[147]TCGVDEFR	0.9997	DNDCVDGSDEPANCTQMTCGVDEFR	LRP1_HUMAN	DNDCVDGSDEPANCTQMTCGVDEFR	C
N[115]MTFDLPSDATVVLN[115]R	0.9997	NMTFDLPSDATVVLNR	LAMP1_HUMAN	NMTFDLPSDATVVLNR	S
DN[115]NSIICSGLGDCVCGQCLCHTSDVPGK	0.9997	DNNSIICSGLGDCVCGQCLCHTSDVPGK	ITB2_HUMAN	DNNSIICSGLGDCVCGQCLCHTSDVPGK	L
ALM[147]N[115]GSESR	0.9997	ALMNGSESR	BASI_HUMAN	ALMNGSESR	F
M[147]PNHLHHSTQENAILAIEQYEELVDVN[115]CSAVLR	0.9997	MPNHLHHSTQENAILAIEQYEELVDVNCSAVLR	SFRP4_HUMAN	MPNHLHHSTQENAILAIEQYEELVDVNCSAVLR	F
SN[115]YTPITNVPPEVTVLTNSPVELR	0.9997	SNYTPITNVPPEVTVLTNSPVELR	DRA_HUMAN	SNYTPITNVPPEVTVLTNSPVELR	E
TSN[115]ISKPGTLER	0.9997	TSNISKPGTLER	MRC2_HUMAN	TSNISKPGTLER	G
TLSELM[147]SQTGHLGLAN[115]ASAPSGEQLLR	0.9997	TLSELMSQTGHLGLANASAPSGEQLLR	LAMA5_HUMAN	TLSELMSQTGHLGLANASAPSGEQLLR	T
GN[115]CTYVLM[147]R	0.9997	GNCTYVLMR	MUC5B_HUMAN	GNCTYVLMR	E
VPTAENCQSCN[115]CTPSGIQCAHSLEACTCTYEDR	0.9997	VPTAENCQSCNCTPSGIQCAHSLEACTCTYEDR	MUC5B_HUMAN	VPTAENCQSCNCTPSGIQCAHSLEACTCTYEDR	T
VTVLGVATAPQQVLSNGVPVSN[115]FTYSPDTK	0.9997	VTVLGVATAPQQVLSNGVPVSNFTYSPDTK	LYAG_HUMAN	VTVLGVATAPQQVLSNGVPVSNFTYSPDTK	V
VN[115]ASTTEPN[115]STVEQSALMR	0.9997	VNASTTEPNSTVEQSALMR	LAMB1_HUMAN	VNASTTEPNSTVEQSALMR	D
ELFN[115]ITNGAR	0.9997	ELFNITNGAR	ITAM_HUMAN	ELFNITNGAR	K
N[115]LTEVVPQLLDQLR	0.9997	NLTEVVPQLLDQLR	LAMA4_HUMAN	NLTEVVPQLLDQLR	T
LSNLSN[115]LSHDLVQEAIDHAQDLQQEANELSR	0.9997	LSNLSNLSHDLVQEAIDHAQDLQQEANELSR	LAMA4_HUMAN	LSNLSNLSHDLVQEAIDHAQDLQQEANELSR	K
GILN[115]ATISVAEINHPVTTYK	0.9997	GILNATISVAEINHPVTTYK	CBPD_HUMAN	GILNATISVAEINHPVTTYK	T
TFADLAAHN[115]QTFLK	0.9997	TFADLAAHNQTFLK	CO6A6_HUMAN	TFADLAAHNQTFLK	K
ILN[115]QTQDGAFCYWEICGPN[115]GTVEK	0.9997	ILNQTQDGAFCYWEICGPNGTVEK	MUC2_HUMAN	ILNQTQDGAFCYWEICGPNGTVEK	H
NCQDIDECVTGIHNCSIN[115]ETCFNIQGGFR	0.9997	NCQDIDECVTGIHNCSINETCFNIQGGFR	FBLN1_HUMAN	NCQDIDECVTGIHNCSINETCFNIQGGFR	C
ANYNLPIMVTDSGKPPM[147]TN[115]ITDLR	0.9997	ANYNLPIMVTDSGKPPMTNITDLR	CAD13_HUMAN	ANYNLPIMVTDSGKPPMTNITDLR	V
DIYTFDGALN[115]K	0.9997	DIYTFDGALNK	CD47_HUMAN	DIYTFDGALNK	S
AEGLYSQLLGLTASQSN[115]LTK	0.9997	AEGLYSQLLGLTASQSNLTK	PLVAP_HUMAN	AEGLYSQLLGLTASQSNLTK	E
SLEAQGN[115]SSHLDADTVR	0.9997	SLEAQGNSSHLDADTVR	STAB1_HUMAN	SLEAQGNSSHLDADTVR	H
DSCESNHN[115]ITCK	0.9997	DSCESNHNITCK	ITA1_HUMAN	DSCESNHNITCK	V
SLGSGGSVSQLFSN[115]FTGSVDDR	0.9997	SLGSGGSVSQLFSNFTGSVDDR	OLFM4_HUMAN	SLGSGGSVSQLFSNFTGSVDDR	G
DQNTPVVHPPPTPGSCGHGGVVN[115]ISKPSVVQLNWR	0.9997	DQNTPVVHPPPTPGSCGHGGVVNISKPSVVQLNWR	OLFM4_HUMAN	DQNTPVVHPPPTPGSCGHGGVVNISKPSVVQLNWR	G
ALPGN[115]LTAAVM[147]EAN[115]QTGHEFPDR	0.9997	ALPGNLTAAVMEANQTGHEFPDR	MMRN2_HUMAN	ALPGNLTAAVMEANQTGHEFPDR	S
EGSLPGN[115]STISIR	0.9997	EGSLPGNSTISIR	LAMA3_HUMAN	EGSLPGNSTISIR	A
SDEYN[115]CSSGM[147]CIR	0.9997	SDEYNCSSGMCIR	SORL_HUMAN	SDEYNCSSGMCIR	S
NILPN[115]ITTTYLK	0.9997	NILPNITTTYLK	P2RX4_HUMAN	NILPNITTTYLK	S
LPN[115]STIYVVEPGYLGFTVHPGDR	0.9997	LPNSTIYVVEPGYLGFTVHPGDR	PO210_HUMAN	LPNSTIYVVEPGYLGFTVHPGDR	W
SVVAPATDGGLN[115]LTSTFLR	0.9997	SVVAPATDGGLNLTSTFLR	PTGDS_HUMAN	SVVAPATDGGLNLTSTFLR	K
AEN[115]GTCIDIDECK	0.9997	AENGTCIDIDECK	HMCN1_HUMAN	AENGTCIDIDECK	D
KPGLSISEN[115]R	0.9997	KPGLSISENR	HMCN1_HUMAN	KPGLSISENR	S
M[147]LN[115]ETVLVSNPVQLECK	0.9997	MLNETVLVSNPVQLECK	HMCN1_HUMAN	MLNETVLVSNPVQLECK	A
YN[115]CTATNHIGTR	0.9997	YNCTATNHIGTR	NCAM2_HUMAN	YNCTATNHIGTR	F
GIQEIIQM[147]N[115]K	0.9997	GIQEIIQMNK	S6A14_HUMAN	GIQEIIQMNK	S
SPIVTHCN[115]VSTVNK	0.9997	SPIVTHCNVSTVNK	S6A14_HUMAN	SPIVTHCNVSTVNK	G
DSPVLPVTLQCN[115]LTSSSHTLTYSYWTK	0.9997	DSPVLPVTLQCNLTSSSHTLTYSYWTK	NPTN_HUMAN	DSPVLPVTLQCNLTSSSHTLTYSYWTK	N
AAEDWTENPEPFN[115]ASFYR	0.9997	AAEDWTENPEPFNASFYR	CA2D2_HUMAN	AAEDWTENPEPFNASFYR	R
DLN[115]ASDNNTEFLK	0.9997	DLNASDNNTEFLK	CA2D2_HUMAN	DLNASDNNTEFLK	N
SVN[115]VSVICPSPSM[147]LPAER	0.9997	SVNVSVICPSPSMLPAER	KERA_HUMAN	SVNVSVICPSPSMLPAER	D
IDFSGSQDN[115]LTITM[147]HR	0.9997	IDFSGSQDNLTITMHR	CD7_HUMAN	IDFSGSQDNLTITMHR	L
EAVFAVNALN[115]ISEK	0.9997	EAVFAVNALNISEK	SEM4D_HUMAN	EAVFAVNALNISEK	Q
YGNPN[115]ETQNN[115]STSWPVFK	0.9997	YGNPNETQNNSTSWPVFK	CHLE_HUMAN	YGNPNETQNNSTSWPVFK	S
DGSDEPGTAACPN[115]GSFHCTNTGYKPLYIPSNR	0.9997	DGSDEPGTAACPNGSFHCTNTGYKPLYIPSNR	GLU2B_HUMAN	DGSDEPGTAACPNGSFHCTNTGYKPLYIPSNR	V
LNVEAAN[115]WTVR	0.9997	LNVEAANWTVR	PHLD_HUMAN	LNVEAANWTVR	G
HNIIPIFAVTN[115]YSYSYYEK	0.9997	HNIIPIFAVTNYSYSYYEK	ITB4_HUMAN	HNIIPIFAVTNYSYSYYEK	L
DSGIWINGFDYTGISHITPHIPEIN[115]DSIR	0.9997	DSGIWINGFDYTGISHITPHIPEINDSIR	ERMP1_HUMAN	DSGIWINGFDYTGISHITPHIPEINDSIR	A
HGVIISSTVDTYEN[115]GSSVEYR	0.9997	HGVIISSTVDTYENGSSVEYR	F13B_HUMAN	HGVIISSTVDTYENGSSVEYR	C
ENWNCM[147]QCLHPHN[115]LSQAILDQCK	0.9997	ENWNCMQCLHPHNLSQAILDQCK	ITB8_HUMAN	ENWNCMQCLHPHNLSQAILDQCK	T
ITTLPNVTFLPQN[115]ATTISSR	0.9997	ITTLPNVTFLPQNATTISSR	MUC7_HUMAN	ITTLPNVTFLPQNATTISSR	E
VPIN[115]TSCNPTAHLVN[115]SSCPGLM[147]CVFQGYSSK	0.9997	VPINTSCNPTAHLVNSSCPGLMCVFQGYSSK	CTL4_HUMAN	VPINTSCNPTAHLVNSSCPGLMCVFQGYSSK	G
VLNTN[115]GTSGFLPGGYTCFPHSQPWQAALLVQGR	0.9997	VLNTNGTSGFLPGGYTCFPHSQPWQAALLVQGR	KLK13_HUMAN	VLNTNGTSGFLPGGYTCFPHSQPWQAALLVQGR	L
DPEIEM[147]SGGLVN[115]GSSVTVSCK	0.9997	DPEIEMSGGLVNGSSVTVSCK	VCAM1_HUMAN	DPEIEMSGGLVNGSSVTVSCK	V
TGAFSM[147]PEVNVDYN[115]ASSETLR	0.9997	TGAFSMPEVNVDYNASSETLR	VTCN1_HUMAN	TGAFSMPEVNVDYNASSETLR	C
HSN[115]CTHQQDAGVTCSDGSNLEMR	0.9996	HSNCTHQQDAGVTCSDGSNLEMR	C163A_HUMAN	HSNCTHQQDAGVTCSDGSNLEMR	L
YYN[115]QSEAGSHIIQVMYGCDVGPDGR	0.9996	YYNQSEAGSHIIQVMYGCDVGPDGR	1B57_HUMAN	YYNQSEAGSHIIQVMYGCDVGPDGR	L
YYN[115]QSEAGSHIIQVM[147]YGCDVGPDGR	0.9996	YYNQSEAGSHIIQVMYGCDVGPDGR	1B57_HUMAN	YYNQSEAGSHIIQVMYGCDVGPDGR	L
AN[115]LTVVLLR	0.9996	ANLTVVLLR	ICAM1_HUMAN	ANLTVVLLR	G
IYVLDGTQN[115]DTAFVFPR	0.9996	IYVLDGTQNDTAFVFPR	OLFL3_HUMAN	IYVLDGTQNDTAFVFPR	L
TAVN[115]CSSDFDACLITK	0.9996	TAVNCSSDFDACLITK	CD59_HUMAN	TAVNCSSDFDACLITK	A
LITEEAN[115]R	0.9996	LITEEANR	LAMA4_HUMAN	LITEEANR	T
GM[147]CYFTN[115]GTER	0.9996	GMCYFTNGTER	DQB2_HUMAN	GMCYFTNGTER	V
TQN[115]FTLLVQGSPELK	0.9996	TQNFTLLVQGSPELK	BCAM_HUMAN	TQNFTLLVQGSPELK	T
HTNM[147]N[115]LTQLK	0.9996	HTNMNLTQLK	PON2_HUMAN	HTNMNLTQLK	V
EQIN[115]ITLDHR	0.9996	EQINITLDHR	PLOD1_HUMAN	EQINITLDHR	C
YIHQN[115]YTK	0.9996	YIHQNYTK	PLOD1_HUMAN	YIHQNYTK	A
FINYN[115]QTVSR	0.9996	FINYNQTVSR	EMC1_HUMAN	FINYNQTVSR	M
INPQSWFDN[115]GSICM[147]R	0.9996	INPQSWFDNGSICMR	CPXM2_HUMAN	INPQSWFDNGSICMR	M
VVNEM[147]CPN[115]ITR	0.9996	VVNEMCPNITR	CPXM2_HUMAN	VVNEMCPNITR	I
FAEIN[115]GSALCSYNLKPSEYTTSPK	0.9996	FAEINGSALCSYNLKPSEYTTSPK	CTL1_HUMAN	FAEINGSALCSYNLKPSEYTTSPK	S
LCQGLGLN[115]LTK	0.9996	LCQGLGLNLTK	OXLA_HUMAN	LCQGLGLNLTK	F
GFQWVTGDNN[115]TSYSR	0.9996	GFQWVTGDNNTSYSR	TRBM_HUMAN	GFQWVTGDNNTSYSR	W
GFQWVTGDN[115]NTSYSR	0.9996	GFQWVTGDNNTSYSR	TRBM_HUMAN	GFQWVTGDNNTSYSR	W
ANQQLN[115]FTEAK	0.9996	ANQQLNFTEAK	LYVE1_HUMAN	ANQQLNFTEAK	E
LNAIN[115]ITSALDR	0.9996	LNAINITSALDR	SGCE_HUMAN	LNAINITSALDR	G
LLAN[115]SSM[147]LGEGQVLR	0.9996	LLANSSMLGEGQVLR	SE6L2_HUMAN	LLANSSMLGEGQVLR	S
IVSPEPGGAVGPN[115]LTCR	0.9996	IVSPEPGGAVGPNLTCR	SE6L2_HUMAN	IVSPEPGGAVGPNLTCR	W
NILDALM[147]LN[115]TTR	0.9996	NILDALMLNTTR	CECR1_HUMAN	NILDALMLNTTR	I
VQN[115]VTEFDDSLLR	0.9996	VQNVTEFDDSLLR	CECR1_HUMAN	VQNVTEFDDSLLR	N
LQFDDN[115]GTYTCQVK	0.9996	LQFDDNGTYTCQVK	MPZL2_HUMAN	LQFDDNGTYTCQVK	N
VLEAVN[115]GTDAR	0.9996	VLEAVNGTDAR	MPZL2_HUMAN	VLEAVNGTDAR	L
LVPHM[147]N[115]VSAVEK	0.9996	LVPHMNVSAVEK	CNDP1_HUMAN	LVPHMNVSAVEK	Q
LCDEGHGLEVEIN[115]CTR	0.9996	LCDEGHGLEVEINCTR	TNR6_HUMAN	LCDEGHGLEVEINCTR	T
GSSVILN[115]CSAYSEPSPK	0.9996	GSSVILNCSAYSEPSPK	NEO1_HUMAN	GSSVILNCSAYSEPSPK	I
LPSGM[147]LVISN[115]ATEGDGGLYR	0.9996	LPSGMLVISNATEGDGGLYR	NEO1_HUMAN	LPSGMLVISNATEGDGGLYR	C
FQTVDSSNIDGFVN[115]CTK	0.9996	FQTVDSSNIDGFVNCTK	ERBB3_HUMAN	FQTVDSSNIDGFVNCTK	I
HFN[115]DSGACVPR	0.9996	HFNDSGACVPR	ERBB3_HUMAN	HFNDSGACVPR	C
LGQAPANWYN[115]DTYPLSPPQR	0.9996	LGQAPANWYNDTYPLSPPQR	CANT1_HUMAN	LGQAPANWYNDTYPLSPPQR	T
IFIFN[115]QTGIEAK	0.9996	IFIFNQTGIEAK	TXD15_HUMAN	IFIFNQTGIEAK	K
GINYN[115]SSVAK	0.9996	GINYNSSVAK	FA11_HUMAN	GINYNSSVAK	S
ESLNLWYDCTWNN[115]DTK	0.9996	ESLNLWYDCTWNNDTK	EMP3_HUMAN	ESLNLWYDCTWNNDTK	T
AQEALSM[147]GN[115]ATFYEVESILK	0.9996	AQEALSMGNATFYEVESILK	LAMC2_HUMAN	AQEALSMGNATFYEVESILK	N
YVN[115]LTCSSGK	0.9996	YVNLTCSSGK	SCUB2_HUMAN	YVNLTCSSGK	Q
LTLQPVDN[115]STISLQM[147]GTNK	0.9996	LTLQPVDNSTISLQMGTNK	CNN3_HUMAN	LTLQPVDNSTISLQMGTNK	V
EVQCLSTN[115]QTLSTR	0.9996	EVQCLSTNQTLSTR	ATL4_HUMAN	EVQCLSTNQTLSTR	C
LVSGN[115]LTDR	0.9996	LVSGNLTDR	ATL4_HUMAN	LVSGNLTDR	G
AM[147]N[115]TSQVEALGIQM[147]LPGYR	0.9996	AMNTSQVEALGIQMLPGYR	GT251_HUMAN	AMNTSQVEALGIQMLPGYR	D
FGEFGN[115]YSLLVK	0.9996	FGEFGNYSLLVK	HGNAT_HUMAN	FGEFGNYSLLVK	N
YPN[115]CTGGAAGYIDR	0.9996	YPNCTGGAAGYIDR	HGNAT_HUMAN	YPNCTGGAAGYIDR	L
AN[115]DSDQGANAEIEYTFHQAPEVVR	0.9996	ANDSDQGANAEIEYTFHQAPEVVR	PCDH1_HUMAN	ANDSDQGANAEIEYTFHQAPEVVR	R
VN[115]VTVEDER	0.9996	VNVTVEDER	TF_HUMAN	VNVTVEDER	T
DFN[115]ETQLAR	0.9996	DFNETQLAR	ANTR1_HUMAN	DFNETQLAR	I
ELGPLYTN[115]ITADIGTDPR	0.9996	ELGPLYTNITADIGTDPR	B4GT3_HUMAN	ELGPLYTNITADIGTDPR	G
DVYSN[115]LSHLPGAPGGPPAPQGLPYCPER	0.9996	DVYSNLSHLPGAPGGPPAPQGLPYCPER	B4GT3_HUMAN	DVYSNLSHLPGAPGGPPAPQGLPYCPER	S
TVLTPATNHM[147]GN[115]VTFTIPANR	0.9996	TVLTPATNHMGNVTFTIPANR	CO3_HUMAN	TVLTPATNHMGNVTFTIPANR	E
VYIN[115]DSVELSQNEQK	0.9996	VYINDSVELSQNEQK	CATF_HUMAN	VYINDSVELSQNEQK	L
NLGGLETEDDYSYQGHM[147]QSCN[115]FSAEK	0.9996	NLGGLETEDDYSYQGHMQSCNFSAEK	CATF_HUMAN	NLGGLETEDDYSYQGHMQSCNFSAEK	A
DGQLLPSSN[115]YSNIK	0.9996	DGQLLPSSNYSNIK	NCAM1_HUMAN	DGQLLPSSNYSNIK	I
LFN[115]STQLAAM[147]APEHEIPK	0.9996	LFNSTQLAAMAPEHEIPK	GXLT2_HUMAN	LFNSTQLAAMAPEHEIPK	I
YKPDTLAVAVEN[115]GTGTDR	0.9996	YKPDTLAVAVENGTGTDR	ITFG3_HUMAN	YKPDTLAVAVENGTGTDR	Q
VFVQTPTIN[115]YTLR	0.9996	VFVQTPTINYTLR	PAG15_HUMAN	VFVQTPTINYTLR	D
LDM[147]SQN[115]VSLVTAELSK	0.9996	LDMSQNVSLVTAELSK	S29A1_HUMAN	LDMSQNVSLVTAELSK	D
IVVYNQPYIN[115]YSR	0.9996	IVVYNQPYINYSR	CBPQ_HUMAN	IVVYNQPYINYSR	T
LLPAFN[115]TTSGLPYPR	0.9996	LLPAFNTTSGLPYPR	EDEM3_HUMAN	LLPAFNTTSGLPYPR	I
LQNLVIPWAPEN[115]LTLHK	0.9996	LQNLVIPWAPENLTLHK	IL2RG_HUMAN	LQNLVIPWAPENLTLHK	L
YN[115]YTEDPTILR	0.9996	YNYTEDPTILR	PLXA1_HUMAN	YNYTEDPTILR	I
YFYNN[115]QTK	0.9996	YFYNNQTK	TFPI1_HUMAN	YFYNNQTK	Q
HVVYWN[115]SSNPR	0.9996	HVVYWNSSNPR	EFNA4_HUMAN	HVVYWNSSNPR	L
GN[115]ETIVNLIHSTR	0.9996	GNETIVNLIHSTR	CBPE_HUMAN	GNETIVNLIHSTR	I
DLQGNPIAN[115]ATISVEGIDHDVTSAK	0.9996	DLQGNPIANATISVEGIDHDVTSAK	CBPE_HUMAN	DLQGNPIANATISVEGIDHDVTSAK	D
M[147]ACAAQN[115]ASLLK	0.9996	MACAAQNASLLK	CL12A_HUMAN	MACAAQNASLLK	I
ELYN[115]GTADITLR	0.9996	ELYNGTADITLR	PIEZ1_HUMAN	ELYNGTADITLR	F
VDLQTAN[115]ESAYAIYDFFQVASSK	0.9996	VDLQTANESAYAIYDFFQVASSK	TENN_HUMAN	VDLQTANESAYAIYDFFQVASSK	E
EVYPWYN[115]LTVEAK	0.9996	EVYPWYNLTVEAK	CADH5_HUMAN	EVYPWYNLTVEAK	E
ELN[115]ESENSVFQAVYGLQR	0.9996	ELNESENSVFQAVYGLQR	TMCO3_HUMAN	ELNESENSVFQAVYGLQR	A
M[147]TGSGIYAPN[115]SSR	0.9996	MTGSGIYAPNSSR	VNN1_HUMAN	MTGSGIYAPNSSR	A
GLNIALVN[115]GTTGAVLGQK	0.9996	GLNIALVNGTTGAVLGQK	FAM3D_HUMAN	GLNIALVNGTTGAVLGQK	A
VATPYSLYVCPEGQN[115]VTLTCR	0.9996	VATPYSLYVCPEGQNVTLTCR	GI24_HUMAN	VATPYSLYVCPEGQNVTLTCR	L
GGYIFPTQQPN[115]TTTLASR	0.9996	GGYIFPTQQPNTTTLASR	MGA_HUMAN	GGYIFPTQQPNTTTLASR	K
ILGTEEPSN[115]VTVK	0.9996	ILGTEEPSNVTVK	MGA_HUMAN	ILGTEEPSNVTVK	H
M[147]SLVM[147]PAM[147]APN[115]ETLSGR	0.9996	MSLVMPAMAPNETLSGR	ATF6B_HUMAN	MSLVMPAMAPNETLSGR	G
VESGEN[115]CSSPAPR	0.9996	VESGENCSSPAPR	ITPR1_HUMAN	VESGENCSSPAPR	E
VVLGAHN[115]LSR	0.9996	VVLGAHNLSR	ELNE_HUMAN	VVLGAHNLSR	R
TGVCPELQADQN[115]CTQECVSDSECADNLK	0.9996	TGVCPELQADQNCTQECVSDSECADNLK	WFDC2_HUMAN	TGVCPELQADQNCTQECVSDSECADNLK	C
GYYN[115]QSEAGSHTLQWM[147]YGCDLGPDGR	0.9996	GYYNQSEAGSHTLQWMYGCDLGPDGR	1C16_HUMAN	GYYNQSEAGSHTLQWMYGCDLGPDGR	L
LPFQCSASYLGN[115]DTR	0.9996	LPFQCSASYLGNDTR	GP124_HUMAN	LPFQCSASYLGNDTR	I
ANEQVVQSLN[115]QTYK	0.9996	ANEQVVQSLNQTYK	GP116_HUMAN	ANEQVVQSLNQTYK	M
GPGEVIPGGN[115]HSLYSLK	0.9996	GPGEVIPGGNHSLYSLK	S28A3_HUMAN	GPGEVIPGGNHSLYSLK	G
ENM[147]VLN[115]LSCEASGHPR	0.9996	ENMVLNLSCEASGHPR	MUC18_HUMAN	ENMVLNLSCEASGHPR	P
ILFYNVVVENLDKPSSSELHSIPAPAN[115]STK	0.9996	ILFYNVVVENLDKPSSSELHSIPAPANSTK	OSMR_HUMAN	ILFYNVVVENLDKPSSSELHSIPAPANSTK	L
LFN[115]VTSTLR	0.9996	LFNVTSTLR	PD1L1_HUMAN	LFNVTSTLR	I
IN[115]TTTNEIFYCTFR	0.9996	INTTTNEIFYCTFR	PD1L1_HUMAN	INTTTNEIFYCTFR	R
NN[115]LTLIEN[115]LTEITTDVEK	0.9996	NNLTLIENLTEITTDVEK	PGFRA_HUMAN	NNLTLIENLTEITTDVEK	I
YHVLHIN[115]TTK	0.9996	YHVLHINTTK	HS2ST_HUMAN	YHVLHINTTK	N
AIIAN[115]LTCK	0.9996	AIIANLTCK	ENPP2_HUMAN	AIIANLTCK	K
AEGWEEGPPTVLSDSPWTN[115]ISGSCK	0.9996	AEGWEEGPPTVLSDSPWTNISGSCK	ENPP2_HUMAN	AEGWEEGPPTVLSDSPWTNISGSCK	G
ISVITIFGPVNN[115]STM[147]K	0.9996	ISVITIFGPVNNSTMK	CCD80_HUMAN	ISVITIFGPVNNSTMK	I
ISVITIFGPVN[115]NSTM[147]K	0.9996	ISVITIFGPVNNSTMK	CCD80_HUMAN	ISVITIFGPVNNSTMK	I
SLPNFPN[115]TSATAN[115]ATGGR	0.9996	SLPNFPNTSATANATGGR	PI16_HUMAN	SLPNFPNTSATANATGGR	A
IN[115]YTDPFSN[115]QTVK	0.9996	INYTDPFSNQTVK	TM206_HUMAN	INYTDPFSNQTVK	S
LVSFEVPQN[115]TSVK	0.9996	LVSFEVPQNTSVK	DNER_HUMAN	LVSFEVPQNTSVK	I
LGHIN[115]FTISTK	0.9996	LGHINFTISTK	A2ML1_HUMAN	LGHINFTISTK	I
LGN[115]NTAAWDQLGK	0.9996	LGNNTAAWDQLGK	MGAL1_HUMAN	LGNNTAAWDQLGK	S
VVDDVSN[115]QTSCR	0.9996	VVDDVSNQTSCR	CRLF1_HUMAN	VVDDVSNQTSCR	L
ELLQEFIDDN[115]ATTNAIDELK	0.9996	ELLQEFIDDNATTNAIDELK	SG2A2_HUMAN	ELLQEFIDDNATTNAIDELK	E
VPIQAN[115]ETLVGAVINN[115]VSEAM[147]ETLTR	0.9996	VPIQANETLVGAVINNVSEAMETLTR	EAA1_HUMAN	VPIQANETLVGAVINNVSEAMETLTR	I
YSLN[115]VTYNYPVHYFDGR	0.9996	YSLNVTYNYPVHYFDGR	CC50A_HUMAN	YSLNVTYNYPVHYFDGR	K
HCFN[115]ISISAVPR	0.9996	HCFNISISAVPR	RTBDN_HUMAN	HCFNISISAVPR	P
AVENYCASISPQLIHCVNN[115]YTQSYPM[147]R	0.9996	AVENYCASISPQLIHCVNNYTQSYPMR	RECK_HUMAN	AVENYCASISPQLIHCVNNYTQSYPMR	N
DCDVLTAVSEFFN[115]ASCVPVNNPK	0.9996	DCDVLTAVSEFFNASCVPVNNPK	TRFM_HUMAN	DCDVLTAVSEFFNASCVPVNNPK	N
GN[115]SSLYPVASPSLQQLVVEK	0.9996	GNSSLYPVASPSLQQLVVEK	NADL2_HUMAN	GNSSLYPVASPSLQQLVVEK	N
ESLQLHN[115]VTK	0.9996	ESLQLHNVTK	TRDN_HUMAN	ESLQLHNVTK	A
LWN[115]STFLEEYSAVK	0.9996	LWNSTFLEEYSAVK	ITA7_HUMAN	LWNSTFLEEYSAVK	S
GN[115]ETLHYETFGK	0.9996	GNETLHYETFGK	ICAM2_HUMAN	GNETLHYETFGK	A
GSLEVN[115]CSTTCNQPEVGGLETSLDK	0.9996	GSLEVNCSTTCNQPEVGGLETSLDK	ICAM2_HUMAN	GSLEVNCSTTCNQPEVGGLETSLDK	I
HYLVSN[115]ISHDTVLQCHFTCSGK	0.9996	HYLVSNISHDTVLQCHFTCSGK	ICAM2_HUMAN	HYLVSNISHDTVLQCHFTCSGK	Q
EEQYN[115]STFR	0.9995	EEQYNSTFR	IGHG3_HUMAN	EEQYNSTFR	V
WNPPSLPNGN[115]LSYYIVR	0.9995	WNPPSLPNGNLSYYIVR	IGF1R_HUMAN	WNPPSLPNGNLSYYIVR	W
ASN[115]ITM[147]ILK	0.9995	ASNITMILK	PLXC1_HUMAN	ASNITMILK	G
VTFN[115]CSTPHQHM[147]SFILYK	0.9995	VTFNCSTPHQHMSFILYK	IGSF1_HUMAN	VTFNCSTPHQHMSFILYK	D
NIETN[115]YTR	0.9995	NIETNYTR	CLN5_HUMAN	NIETNYTR	I
VEVEPLN[115]STAVHVYWK	0.9994	VEVEPLNSTAVHVYWK	PTPRF_HUMAN	VEVEPLNSTAVHVYWK	L
TTLVDN[115]NTWNNSHIALVGK	0.9994	TTLVDNNTWNNSHIALVGK	STT3B_HUMAN	TTLVDNNTWNNSHIALVGK	A
M[147]DGSLNFN[115]R	0.9994	MDGSLNFNR	FIBA_HUMAN	MDGSLNFNR	T
IN[115]ITEM[147]YK	0.9994	INITEMYK	THSD4_HUMAN	INITEMYK	S
GYYN[115]QSEAGSHTLQWMYGCDLGPDGR	0.9993	GYYNQSEAGSHTLQWMYGCDLGPDGR	1C16_HUMAN	GYYNQSEAGSHTLQWMYGCDLGPDGR	L
VLYTFVLM[147]PIN[115]ASNALTLAHQLR	0.9993	VLYTFVLMPINASNALTLAHQLR	GP124_HUMAN	VLYTFVLMPINASNALTLAHQLR	V
ITSN[115]ATSDLNIK	0.9993	ITSNATSDLNIK	SGCB_HUMAN	ITSNATSDLNIK	V
GTWSTAESGAECTNWN[115]SSALAQKPYSGR	0.9993	GTWSTAESGAECTNWNSSALAQKPYSGR	TPA_HUMAN	GTWSTAESGAECTNWNSSALAQKPYSGR	R
GGAPFVLSSLLHQDPSTN[115]QTWLLVTSPR	0.9993	GGAPFVLSSLLHQDPSTNQTWLLVTSPR	ITAE_HUMAN	GGAPFVLSSLLHQDPSTNQTWLLVTSPR	T
SN[115]SSM[147]HITDCR	0.9993	SNSSMHITDCR	RNAS1_HUMAN	SNSSMHITDCR	L
ALVCSQPGLN[115]CTVK	0.9993	ALVCSQPGLNCTVK	I17RA_HUMAN	ALVCSQPGLNCTVK	N
VTTPCM[147]SSGSLWDPN[115]ITVETLEAHQLR	0.9993	VTTPCMSSGSLWDPNITVETLEAHQLR	I17RA_HUMAN	VTTPCMSSGSLWDPNITVETLEAHQLR	V
EQMEVVN[115]MSLSTSADSLTTPR	0.9992	EQMEVVNMSLSTSADSLTTPR	LAMA4_HUMAN	EQMEVVNMSLSTSADSLTTPR	L
TQDEILFSN[115]STR	0.9992	TQDEILFSNSTR	CD109_HUMAN	TQDEILFSNSTR	L
LVAN[115]LTYTLQLDGHR	0.9992	LVANLTYTLQLDGHR	ITAL_HUMAN	LVANLTYTLQLDGHR	T
AN[115]ATIEVK	0.9992	ANATIEVK	NPTN_HUMAN	ANATIEVK	A
ILSN[115]LSCNVK	0.9992	ILSNLSCNVK	GP126_HUMAN	ILSNLSCNVK	G
VQN[115]ITQVGSVTK	0.9992	VQNITQVGSVTK	ITAE_HUMAN	VQNITQVGSVTK	T
AALSN[115]ASLLAEACHQIFEGK	0.9992	AALSNASLLAEACHQIFEGK	GNT2A_HUMAN	AALSNASLLAEACHQIFEGK	V
NN[115]TTFLECAPK	0.9992	NNTTFLECAPK	SEM3C_HUMAN	NNTTFLECAPK	S
VINSLSM[147]GIN[115]K	0.9991	VINSLSMGINK	CO6A6_HUMAN	VINSLSMGINK	S
HM[147]LALAPN[115]STAR	0.9991	HMLALAPNSTAR	PIEZ1_HUMAN	HMLALAPNSTAR	R
NYYADN[115]QTCDGELLFNM[147]TK	0.999	NYYADNQTCDGELLFNMTK	FBN1_HUMAN	NYYADNQTCDGELLFNMTK	K
VAVVQHAPSESVDN[115]ASMPPVK	0.999	VAVVQHAPSESVDNASMPPVK	CO6A3_HUMAN	VAVVQHAPSESVDNASMPPVK	V
EKPEAGTYSVNNGN[115]DTCLLATM[147]GLQLN[115]ITQDK	0.999	EKPEAGTYSVNNGNDTCLLATMGLQLNITQDK	LAMP2_HUMAN	EKPEAGTYSVNNGNDTCLLATMGLQLNITQDK	V
IETILLN[115]GTDR	0.999	IETILLNGTDR	LRP1_HUMAN	IETILLNGTDR	K
WLCDGDNDCGNSEDESN[115]ATCSAR	0.999	WLCDGDNDCGNSEDESNATCSAR	LRP1_HUMAN	WLCDGDNDCGNSEDESNATCSAR	T
VSVNTAN[115]VTLGPQLMEVTVYR	0.999	VSVNTANVTLGPQLMEVTVYR	GPNMB_HUMAN	VSVNTANVTLGPQLMEVTVYR	R
LFNLGTM[147]QCLGTGWPGTN[115]TTASLGM[147]YECDR	0.999	LFNLGTMQCLGTGWPGTNTTASLGMYECDR	MRC2_HUMAN	LFNLGTMQCLGTGWPGTNTTASLGMYECDR	E
AQQLLAN[115]STALEEAMLQEQQR	0.999	AQQLLANSTALEEAMLQEQQR	LAMA5_HUMAN	AQQLLANSTALEEAMLQEQQR	L
PSAIAAGHGDYALN[115]VTGPILNFFAGHYDTPYPLPK	0.999	PSAIAAGHGDYALNVTGPILNFFAGHYDTPYPLPK	AMPN_HUMAN	PSAIAAGHGDYALNVTGPILNFFAGHYDTPYPLPK	S
GVNFN[115]VSK	0.999	GVNFNVSK	KLKB1_HUMAN	GVNFNVSK	V
DVTVIEGEVATISCQVN[115]K	0.999	DVTVIEGEVATISCQVNK	CADM1_HUMAN	DVTVIEGEVATISCQVNK	S
YYN[115]YTLSINGK	0.999	YYNYTLSINGK	GNS_HUMAN	YYNYTLSINGK	A
LSN[115]LSNLSHDLVQEAIDHAQDLQQEANELSR	0.999	LSNLSNLSHDLVQEAIDHAQDLQQEANELSR	LAMA4_HUMAN	LSNLSNLSHDLVQEAIDHAQDLQQEANELSR	K
EIIYPN[115]ASLLIQNIIQN[115]DTGFYTLHVIK	0.999	EIIYPNASLLIQNIIQNDTGFYTLHVIK	CEAM5_HUMAN	EIIYPNASLLIQNIIQNDTGFYTLHVIK	S
GTQLFEDNYALAVLDNGDPLN[115]NTTPVTGASPGGLR	0.999	GTQLFEDNYALAVLDNGDPLNNTTPVTGASPGGLR	ERBB2_HUMAN	GTQLFEDNYALAVLDNGDPLNNTTPVTGASPGGLR	E
VFHINQPAEFIEDQSILN[115]LTFSDCK	0.999	VFHINQPAEFIEDQSILNLTFSDCK	CAD13_HUMAN	VFHINQPAEFIEDQSILNLTFSDCK	G
LAVTN[115]TTM[147]TGTVLK	0.999	LAVTNTTMTGTVLK	STIM1_HUMAN	LAVTNTTMTGTVLK	M
LQTNAMDGLVN[115]LTM[147]LDLCYNYLHDSLLK	0.999	LQTNAMDGLVNLTMLDLCYNYLHDSLLK	OMD_HUMAN	LQTNAMDGLVNLTMLDLCYNYLHDSLLK	D
LQTNAM[147]DGLVN[115]LTMLDLCYNYLHDSLLK	0.999	LQTNAMDGLVNLTMLDLCYNYLHDSLLK	OMD_HUMAN	LQTNAMDGLVNLTMLDLCYNYLHDSLLK	D
LVGGPVAGGDPN[115]QTIR	0.999	LVGGPVAGGDPNQTIR	LAMA5_HUMAN	LVGGPVAGGDPNQTIR	G
LQGLENWGQDPGVSAN[115]ASK	0.999	LQGLENWGQDPGVSANASK	PBIP1_HUMAN	LQGLENWGQDPGVSANASK	A
PTIN[115]VTCTR	0.999	PTINVTCTR	TIG1_HUMAN	PTINVTCTR	L
VN[115]ETEM[147]DIAK	0.999	VNETEMDIAK	CREG1_HUMAN	VNETEMDIAK	H
AM[147]CYFTN[115]GTER	0.999	AMCYFTNGTER	DQB1_HUMAN	AMCYFTNGTER	V
VN[115]CSVYVQLEK	0.999	VNCSVYVQLEK	LPP2_HUMAN	VNCSVYVQLEK	V
IFM[147]NTCNPSSLTQQWLFEHTN[115]STVLEK	0.999	IFMNTCNPSSLTQQWLFEHTNSTVLEK	GLT10_HUMAN	IFMNTCNPSSLTQQWLFEHTNSTVLEK	F
GDPSVISVN[115]GTDFTFR	0.999	GDPSVISVNGTDFTFR	TMEM2_HUMAN	GDPSVISVNGTDFTFR	S
M[147]ILN[115]SSTEDGIKR	0.999	MILNSSTEDGIKR	AGTR1_HUMAN	MILNSSTEDGIKR	I
LSFGSN[115]SSDFK	0.999	LSFGSNSSDFK	GLB1L_HUMAN	LSFGSNSSDFK	G
ALQWNAGSGGLPEN[115]ETTFAR	0.999	ALQWNAGSGGLPENETTFAR	ARSD_HUMAN	ALQWNAGSGGLPENETTFAR	I
VYDPLYCESVHN[115]FTLPSWATEDTM[147]TK	0.999	VYDPLYCESVHNFTLPSWATEDTMTK	PPAP_HUMAN	VYDPLYCESVHNFTLPSWATEDTMTK	L
IGPGEPLELLCN[115]VSGALPPAGR	0.999	IGPGEPLELLCNVSGALPPAGR	IGSF8_HUMAN	IGPGEPLELLCNVSGALPPAGR	H
FACPEGWTLN[115]GSAAR	0.999	FACPEGWTLNGSAAR	LYAM2_HUMAN	FACPEGWTLNGSAAR	T
VQCSPGHYYN[115]TSIHR	0.999	VQCSPGHYYNTSIHR	SCUB3_HUMAN	VQCSPGHYYNTSIHR	C
DHEN[115]GTGTNTYAALNSVYLM[147]M[147]NNQM[147]R	0.9989	DHENGTGTNTYAALNSVYLMMNNQMR	CO2_HUMAN	DHENGTGTNTYAALNSVYLMMNNQMR	L
ECYYNLNDASLCDNVLAPN[115]VTK	0.9989	ECYYNLNDASLCDNVLAPNVTK	LTBP1_HUMAN	ECYYNLNDASLCDNVLAPNVTK	Q
GN[115]TTTLISENGHAADTLTATNFR	0.9989	GNTTTLISENGHAADTLTATNFR	LTBP1_HUMAN	GNTTTLISENGHAADTLTATNFR	V
HGNLYDLKPLGLN[115]DTIVSAGEYTYYFR	0.9989	HGNLYDLKPLGLNDTIVSAGEYTYYFR	MPRI_HUMAN	HGNLYDLKPLGLNDTIVSAGEYTYYFR	V
DPCSN[115]VTCSFGSTCAR	0.9989	DPCSNVTCSFGSTCAR	AGRIN_HUMAN	DPCSNVTCSFGSTCAR	S
FNPGAESVVLSN[115]STLK	0.9989	FNPGAESVVLSNSTLK	MMRN1_HUMAN	FNPGAESVVLSNSTLK	F
ELAVPDGYTN[115]R	0.9989	ELAVPDGYTNR	ITA3_HUMAN	ELAVPDGYTNR	T
YADAGHVCHLCHPN[115]CTYGCTGPGLEGCPTNGPK	0.9989	YADAGHVCHLCHPNCTYGCTGPGLEGCPTNGPK	EGFR_HUMAN	YADAGHVCHLCHPNCTYGCTGPGLEGCPTNGPK	I
LTFYGN[115]WSEK	0.9989	LTFYGNWSEK	SPON1_HUMAN	LTFYGNWSEK	T
EFCN[115]LSLSER	0.9989	EFCNLSLSER	ABCAC_HUMAN	EFCNLSLSER	S
FCPLPPPPYQN[115]QSTCAVYHR	0.9989	FCPLPPPPYQNQSTCAVYHR	MUC5A_HUMAN	FCPLPPPPYQNQSTCAVYHR	S
QECYAFN[115]GTQR	0.9989	QECYAFNGTQR	DPB1_HUMAN	QECYAFNGTQR	F
VAAAN[115]VSVTQPESTGDPNN[115]MTLLAEEAR	0.9988	VAAANVSVTQPESTGDPNNMTLLAEEAR	LAMC1_HUMAN	VAAANVSVTQPESTGDPNNMTLLAEEAR	K
YFWYHN[115]DTLLDPSLYK	0.9988	YFWYHNDTLLDPSLYK	CILP1_HUMAN	YFWYHNDTLLDPSLYK	H
VILLPN[115]QTHYIIPK	0.9988	VILLPNQTHYIIPK	GNPTA_HUMAN	VILLPNQTHYIIPK	G
M[147]VLWN[115]DSVVR	0.9988	MVLWNDSVVR	VPP2_HUMAN	MVLWNDSVVR	H
LTGVAGN[115]YTVCQK	0.9988	LTGVAGNYTVCQK	VNN1_HUMAN	LTGVAGNYTVCQK	D
M[147]PGFTCCVPGCYN[115]NSHR	0.9988	MPGFTCCVPGCYNNSHR	THA11_HUMAN	MPGFTCCVPGCYNNSHR	D
ITN[115]ISSDDSGK	0.9988	ITNISSDDSGK	NTRK2_HUMAN	ITNISSDDSGK	Q
NQN[115]ESVSEIGGK	0.9988	NQNESVSEIGGK	SE1L3_HUMAN	NQNESVSEIGGK	I
ELPGVCN[115]ETM[147]MALWEECKPCLK	0.9987	ELPGVCNETMMALWEECKPCLK	CLUS_HUMAN	ELPGVCNETMMALWEECKPCLK	Q
SPDVIN[115]GSPISQK	0.9987	SPDVINGSPISQK	CFAH_HUMAN	SPDVINGSPISQK	I
YSVQLM[147]SFVYN[115]LSDTHLFPNASSK	0.9987	YSVQLMSFVYNLSDTHLFPNASSK	LAMP1_HUMAN	YSVQLMSFVYNLSDTHLFPNASSK	E
IETVLPAEFFEVLSSSQN[115]GSYHR	0.9987	IETVLPAEFFEVLSSSQNGSYHR	PO210_HUMAN	IETVLPAEFFEVLSSSQNGSYHR	I
SHTN[115]TSHVM[147]QYGN[115]K	0.9986	SHTNTSHVMQYGNK	LGMN_HUMAN	SHTNTSHVMQYGNK	T
LLIAGTN[115]SSDLQQILSLLESNK	0.9986	LLIAGTNSSDLQQILSLLESNK	4F2_HUMAN	LLIAGTNSSDLQQILSLLESNK	D
VFCN[115]FTAGGETCLYPDK	0.9986	VFCNFTAGGETCLYPDK	CO5A3_HUMAN	VFCNFTAGGETCLYPDK	K
VLQVGNGVIVGAPGEGN[115]STGSLYQCQSGTGHCLPVTLR	0.9986	VLQVGNGVIVGAPGEGNSTGSLYQCQSGTGHCLPVTLR	ITAL_HUMAN	VLQVGNGVIVGAPGEGNSTGSLYQCQSGTGHCLPVTLR	G
LQVN[115]ISGLKPGVQYNINPYLLQSN[115]K	0.9986	LQVNISGLKPGVQYNINPYLLQSNK	PTPRJ_HUMAN	LQVNISGLKPGVQYNINPYLLQSNK	T
GSGPASEFTFSTPEGVPGHPEALHLECQSN[115]TSLLLR	0.9986	GSGPASEFTFSTPEGVPGHPEALHLECQSNTSLLLR	L1CAM_HUMAN	GSGPASEFTFSTPEGVPGHPEALHLECQSNTSLLLR	W
EETLLYDSN[115]TSSM[147]ADR	0.9986	EETLLYDSNTSSMADR	LCAP_HUMAN	EETLLYDSNTSSMADR	K
FVQAICEGDDCQPPAYTYNN[115]ITCASPPEVVGLDLR	0.9986	FVQAICEGDDCQPPAYTYNNITCASPPEVVGLDLR	ALS_HUMAN	FVQAICEGDDCQPPAYTYNNITCASPPEVVGLDLR	D
MHYDQSQPPYYN[115]VTAM[147]NVPIAVWNGGK	0.9986	MHYDQSQPPYYNVTAMNVPIAVWNGGK	LIPG_HUMAN	MHYDQSQPPYYNVTAMNVPIAVWNGGK	D
M[147]HYDQSQPPYYN[115]VTAM[147]NVPIAVWNGGK	0.9986	MHYDQSQPPYYNVTAMNVPIAVWNGGK	LIPG_HUMAN	MHYDQSQPPYYNVTAMNVPIAVWNGGK	D
FWN[115]ETDPEFVIDHM[147]DANK	0.9986	FWNETDPEFVIDHMDANK	FCAR_HUMAN	FWNETDPEFVIDHMDANK	A
LPYQGN[115]ATM[147]LVVLM[147]EK	0.9986	LPYQGNATMLVVLMEK	ZPI_HUMAN	LPYQGNATMLVVLMEK	M
LSLQNTAEIQHCLVNAGDVGCGVFECFEN[115]NSCEIR	0.9986	LSLQNTAEIQHCLVNAGDVGCGVFECFENNSCEIR	STC2_HUMAN	LSLQNTAEIQHCLVNAGDVGCGVFECFENNSCEIR	G
NYAIIKPIGFN[115]ETAK	0.9986	NYAIIKPIGFNETAK	ITB8_HUMAN	NYAIIKPIGFNETAK	I
LASGVPQLEYHCLGGFYGN[115]LSSQR	0.9986	LASGVPQLEYHCLGGFYGNLSSQR	FAT2_HUMAN	LASGVPQLEYHCLGGFYGNLSSQR	H
ICPQGYTCCTSEM[147]EENLAN[115]R	0.9986	ICPQGYTCCTSEMEENLANR	GPC1_HUMAN	ICPQGYTCCTSEMEENLANR	S
NALLLLADDGGFESGAYN[115]NSAIATPHLDALAR	0.9986	NALLLLADDGGFESGAYNNSAIATPHLDALAR	SPHM_HUMAN	NALLLLADDGGFESGAYNNSAIATPHLDALAR	R
HYHSM[147]EVFTHYDLLNLN[115]GTK	0.9986	HYHSMEVFTHYDLLNLNGTK	LOXL2_HUMAN	HYHSMEVFTHYDLLNLNGTK	V
VWCLGN[115]ETR	0.9986	VWCLGNETR	ROBO1_HUMAN	VWCLGNETR	Y
LFN[115]LTSTFSR	0.9985	LFNLTSTFSR	FUT11_HUMAN	LFNLTSTFSR	H
FN[115]ISTPAFR	0.9984	FNISTPAFR	LAMA3_HUMAN	FNISTPAFR	G
DLN[115]ASDN[115]NTEFLK	0.9984	DLNASDNNTEFLK	CA2D2_HUMAN	DLNASDNNTEFLK	N
GAN[115]DSTSAM[147]PEQMK	0.9984	GANDSTSAMPEQMK	PRS23_HUMAN	GANDSTSAMPEQMK	F
GLTFQQN[115]ASSM[147]CGPDQDTAIR	0.9984	GLTFQQNASSMCGPDQDTAIR	MUCB_HUMAN	GLTFQQNASSMCGPDQDTAIR	V
SAN[115]ASFNIK	0.9983	SANASFNIK	PTK7_HUMAN	SANASFNIK	W
EGELSLPQHQSGEHPAN[115]FSLGPVDLN[115]VSGIYR	0.9983	EGELSLPQHQSGEHPANFSLGPVDLNVSGIYR	FCAR_HUMAN	EGELSLPQHQSGEHPANFSLGPVDLNVSGIYR	C
AEASPN[115]DTAGAR	0.9982	AEASPNDTAGAR	CIC_HUMAN	AEASPNDTAGAR	T
TCPLDEFQCN[115]NTLCKPLAWK	0.9981	TCPLDEFQCNNTLCKPLAWK	LRP1_HUMAN	TCPLDEFQCNNTLCKPLAWK	C
CTDLDECSN[115]GTHMCSQHADCK	0.998	CTDLDECSNGTHMCSQHADCK	FBN1_HUMAN	CTDLDECSNGTHMCSQHADCK	N
GFSGTPGSNEN[115]STQNVYK	0.998	GFSGTPGSNENSTQNVYK	TREM1_HUMAN	GFSGTPGSNENSTQNVYK	I
SDEPVCASDN[115]ATYASECAM[147]K	0.998	SDEPVCASDNATYASECAMK	FST_HUMAN	SDEPVCASDNATYASECAMK	E
IN[115]ISSPGSPVTAVTDDFK	0.998	INISSPGSPVTAVTDDFK	S15A1_HUMAN	INISSPGSPVTAVTDDFK	Q
LN[115]YTLSQGHR	0.9979	LNYTLSQGHR	AMPN_HUMAN	LNYTLSQGHR	V
LDMSQN[115]VSLVTAELSK	0.9978	LDMSQNVSLVTAELSK	S29A1_HUMAN	LDMSQNVSLVTAELSK	D
N[115]HTCNLQQTCYNLQGGFK	0.9978	NHTCNLQQTCYNLQGGFK	FBLN5_HUMAN	NHTCNLQQTCYNLQGGFK	C
AIN[115]LTWTKPFDGNSPLIR	0.9978	AINLTWTKPFDGNSPLIR	SDK2_HUMAN	AINLTWTKPFDGNSPLIR	Y
VLAEVN[115]TSWPVK	0.9978	VLAEVNTSWPVK	MO2R1_HUMAN	VLAEVNTSWPVK	M
IVDVN[115]LTSEGK	0.9977	IVDVNLTSEGK	TM9S3_HUMAN	IVDVNLTSEGK	V
GYYN[115]QSEAGSHTLQWM[147]CGCDLGPDGR	0.9977	GYYNQSEAGSHTLQWMCGCDLGPDGR	1C01_HUMAN	GYYNQSEAGSHTLQWMCGCDLGPDGR	L
DM[147]VTYFM[147]N[115]LSQANAQGTPR	0.9977	DMVTYFMNLSQANAQGTPR	ASM3B_HUMAN	DMVTYFMNLSQANAQGTPR	W
IDN[115]LTGELSTSER	0.9977	IDNLTGELSTSER	PCDH7_HUMAN	IDNLTGELSTSER	R
ALGQAAN[115]ESHN[115]GSILPISWR	0.9977	ALGQAANESHNGSILPISWR	SLAF7_HUMAN	ALGQAANESHNGSILPISWR	W
M[147]CAQQLGDN[115]CTEAAICDPHR	0.9977	MCAQQLGDNCTEAAICDPHR	WISP1_HUMAN	MCAQQLGDNCTEAAICDPHR	G
DHVN[115]VSM[147]VEVTDFPFN[115]TSEWEGYLPK	0.9977	DHVNVSMVEVTDFPFNTSEWEGYLPK	SIAT1_HUMAN	DHVNVSMVEVTDFPFNTSEWEGYLPK	E
VCGLN[115]VSDR	0.9977	VCGLNVSDR	NCKX6_HUMAN	VCGLNVSDR	C
FWLPHN[115]VTWADLK	0.9977	FWLPHNVTWADLK	CERS6_HUMAN	FWLPHNVTWADLK	N
IPNKPN[115]YSLNLWSIMK	0.9976	IPNKPNYSLNLWSIMK	OSBP2_HUMAN	IPNKPNYSLNLWSIMK	N
WQMN[115]FTVR	0.9975	WQMNFTVR	LAMP2_HUMAN	WQMNFTVR	Y
LPFFTN[115]K	0.9975	LPFFTNK	MXRA5_HUMAN	LPFFTNK	T
GVSYCTGN[115]SSECPPPGNAEDDTVCLDLGK	0.9975	GVSYCTGNSSECPPPGNAEDDTVCLDLGK	ADA17_HUMAN	GVSYCTGNSSECPPPGNAEDDTVCLDLGK	C
YVIN[115]GTYAN[115]ETK	0.9975	YVINGTYANETK	EMB_HUMAN	YVINGTYANETK	L
GNEANYYSN[115]ATTDEHGLVQFSIN[115]TTNVM[147]GTSLTVR	0.9974	GNEANYYSNATTDEHGLVQFSINTTNVMGTSLTVR	A2MG_HUMAN	GNEANYYSNATTDEHGLVQFSINTTNVMGTSLTVR	V
DGVHLGPNN[115]R	0.9972	DGVHLGPNNR	FGFR2_HUMAN	DGVHLGPNNR	T
QEVLSHISNMSYIGGTN[115]QTGK	0.9971	QEVLSHISNMSYIGGTNQTGK	CO6A3_HUMAN	QEVLSHISNMSYIGGTNQTGK	G
PGQN[115]CSNYTVR	0.9971	PGQNCSNYTVR	CILP1_HUMAN	PGQNCSNYTVR	F
IINDLAN[115]TSHVYMLPN[115]GTLSIPK	0.9971	IINDLANTSHVYMLPNGTLSIPK	MXRA5_HUMAN	IINDLANTSHVYMLPNGTLSIPK	V
DHHGAN[115]FSCR	0.9971	DHHGANFSCR	ICAM1_HUMAN	DHHGANFSCR	T
LFIPN[115]ITTK	0.9971	LFIPNITTK	CEAM8_HUMAN	LFIPNITTK	N
FPTHYM[147]PYN[115]ESVSFEDR	0.9971	FPTHYMPYNESVSFEDR	ENPP5_HUMAN	FPTHYMPYNESVSFEDR	V
HSN[115]GSYSAFGER	0.997	HSNGSYSAFGER	A2ML1_HUMAN	HSNGSYSAFGER	D
HLDATN[115]STAGYSIYGVGSM[147]SR	0.997	HLDATNSTAGYSIYGVGSMSR	CSTN2_HUMAN	HLDATNSTAGYSIYGVGSMSR	Y
VAQPGINYALGTN[115]VSYPNNLLR	0.997	VAQPGINYALGTNVSYPNNLLR	B3GN1_HUMAN	VAQPGINYALGTNVSYPNNLLR	N
M[147]VVCDLGNPM[147]VSGTN[115]YSLGLR	0.997	MVVCDLGNPMVSGTNYSLGLR	ITA8_HUMAN	MVVCDLGNPMVSGTNYSLGLR	F
EADPLSN[115]GSVM[147]IFN[115]TSALPHLYQIK	0.997	EADPLSNGSVMIFNTSALPHLYQIK	MERTK_HUMAN	EADPLSNGSVMIFNTSALPHLYQIK	Q
NTAFN[115]LTCQAVGPPEPVNIFWVQN[115]SSR	0.997	NTAFNLTCQAVGPPEPVNIFWVQNSSR	MERTK_HUMAN	NTAFNLTCQAVGPPEPVNIFWVQNSSR	V
YVTCAIHN[115]CSEK	0.997	YVTCAIHNCSEK	SORC2_HUMAN	YVTCAIHNCSEK	M
DSSGN[115]ETHFTGNEVGFFKPISCR	0.997	DSSGNETHFTGNEVGFFKPISCR	TM2D1_HUMAN	DSSGNETHFTGNEVGFFKPISCR	N
EAQN[115]QSICSLAELLELAK	0.997	EAQNQSICSLAELLELAK	GDPD5_HUMAN	EAQNQSICSLAELLELAK	G
LGYNAN[115]TSVLSFQAVCR	0.997	LGYNANTSVLSFQAVCR	FHR4_HUMAN	LGYNANTSVLSFQAVCR	E
VTWKPQGAPVEWEEETVTN[115]HTLR	0.997	VTWKPQGAPVEWEEETVTNHTLR	CHL1_HUMAN	VTWKPQGAPVEWEEETVTNHTLR	V
VN[115]VSEDCPQILPSTQIYVPVGVVKPITLAAR	0.9967	VNVSEDCPQILPSTQIYVPVGVVKPITLAAR	PLXA1_HUMAN	VNVSEDCPQILPSTQIYVPVGVVKPITLAAR	N
FLEPYN[115]DSIQAQK	0.9967	FLEPYNDSIQAQK	AT1B2_HUMAN	FLEPYNDSIQAQK	N
VN[115]LSAPLLPK	0.9967	VNLSAPLLPK	TTC17_HUMAN	VNLSAPLLPK	E
LQLSNDN[115]R	0.9966	LQLSNDNR	CEAM5_HUMAN	LQLSNDNR	T
GYN[115]VTYWR	0.9964	GYNVTYWR	L1CAM_HUMAN	GYNVTYWR	E
EGDN[115]ITLK	0.9962	EGDNITLK	CD166_HUMAN	EGDNITLK	C
TLLN[115]ASCDNM[147]LMGIK	0.9962	TLLNASCDNMLMGIK	OLFL1_HUMAN	TLLNASCDNMLMGIK	S
VDCTPLM[147]YSLVHN[115]LTK	0.9962	VDCTPLMYSLVHNLTK	FOLH1_HUMAN	VDCTPLMYSLVHNLTK	E
LSGCQN[115]ITSTK	0.9962	LSGCQNITSTK	INAR1_HUMAN	LSGCQNITSTK	C
ALQAVYSM[147]M[147]SWPDDVPPEGWN[115]R	0.9961	ALQAVYSMMSWPDDVPPEGWNR	CFAB_HUMAN	ALQAVYSMMSWPDDVPPEGWNR	T
GN[115]LSFDWYIK	0.9959	GNLSFDWYIK	ITAM_HUMAN	GNLSFDWYIK	T
YIHFTPNFLLNDN[115]LTAGYGSR	0.9958	YIHFTPNFLLNDNLTAGYGSR	CLCA2_HUMAN	YIHFTPNFLLNDNLTAGYGSR	G
HHYEVIPPLTSPGQPGDM[147]N[115]CTTQR	0.9958	HHYEVIPPLTSPGQPGDMNCTTQR	TM206_HUMAN	HHYEVIPPLTSPGQPGDMNCTTQR	I
ISHEN[115]GTILCSK	0.9958	ISHENGTILCSK	BMPR2_HUMAN	ISHENGTILCSK	G
M[147]TQESALIFPFLN[115]K	0.9958	MTQESALIFPFLNK	CADM3_HUMAN	MTQESALIFPFLNK	S
IVTATVN[115]NSVLQK	0.9958	IVTATVNNSVLQK	ANGP2_HUMAN	IVTATVNNSVLQK	Q
YNQETPM[147]EICLN[115]GTPALAYLASAPPPLCPSGR	0.9957	YNQETPMEICLNGTPALAYLASAPPPLCPSGR	PLD3_HUMAN	YNQETPMEICLNGTPALAYLASAPPPLCPSGR	T
VGDSPN[115]ITEYMFCAGYSDGSK	0.9957	VGDSPNITEYMFCAGYSDGSK	FA7_HUMAN	VGDSPNITEYMFCAGYSDGSK	D
AIYN[115]VSQCPGHQATPR	0.9955	AIYNVSQCPGHQATPR	HEPH_HUMAN	AIYNVSQCPGHQATPR	Q
LN[115]GSITSPGWPK	0.9954	LNGSITSPGWPK	BMP1_HUMAN	LNGSITSPGWPK	E
GTEVN[115]TTVIGENDPIDEVQGFLFGK	0.9954	GTEVNTTVIGENDPIDEVQGFLFGK	UGGG1_HUMAN	GTEVNTTVIGENDPIDEVQGFLFGK	L
DSAAAASDPGTIVHN[115]FSR	0.9954	DSAAAASDPGTIVHNFSR	FA20A_HUMAN	DSAAAASDPGTIVHNFSR	T
EHYN[115]LSAATCSPGQM[147]CGHYTQVVWAK	0.9952	EHYNLSAATCSPGQMCGHYTQVVWAK	PI16_HUMAN	EHYNLSAATCSPGQMCGHYTQVVWAK	T
FEM[147]N[115]NSTTTTSSSNSK	0.9952	FEMNNSTTTTSSSNSK	ZN608_HUMAN	FEMNNSTTTTSSSNSK	D
EAVAECLNHN[115]LTIFFDVK	0.9951	EAVAECLNHNLTIFFDVK	GDE1_HUMAN	EAVAECLNHNLTIFFDVK	G
DPQGWVAGN[115]LSAR	0.995	DPQGWVAGNLSAR	RON_HUMAN	DPQGWVAGNLSAR	G
TFAVYLN[115]NTGYR	0.9948	TFAVYLNNTGYR	SULF1_HUMAN	TFAVYLNNTGYR	T
GLFPAILNLASNAHISTN[115]ATCGEK	0.9948	GLFPAILNLASNAHISTNATCGEK	LAMA1_HUMAN	GLFPAILNLASNAHISTNATCGEK	G
SYN[115]DSVDPR	0.9947	SYNDSVDPR	PERM_HUMAN	SYNDSVDPR	I
IN[115]SSVTDIEEIIGVR	0.9944	INSSVTDIEEIIGVR	FAT1_HUMAN	INSSVTDIEEIIGVR	I
GLSPGN[115]YSVR	0.9935	GLSPGNYSVR	INSR_HUMAN	GLSPGNYSVR	I
ITLHEN[115]R	0.9934	ITLHENR	MXRA5_HUMAN	ITLHENR	T
LFSN[115]GTVLYALR	0.9927	LFSNGTVLYALR	GBRP_HUMAN	LFSNGTVLYALR	I
GLLN[115]LTYYQQIQVQK	0.9925	GLLNLTYYQQIQVQK	SIAE_HUMAN	GLLNLTYYQQIQVQK	K
IAN[115]ISGDGQK	0.9924	IANISGDGQK	LY75_HUMAN	IANISGDGQK	W
IVTDWQN[115]YTR	0.9923	IVTDWQNYTR	SCAR3_HUMAN	IVTDWQNYTR	L
VFPYISAM[147]VNN[115]GSLSYDHER	0.9922	VFPYISAMVNNGSLSYDHER	LMA2L_HUMAN	VFPYISAMVNNGSLSYDHER	D
LEN[115]ITNPWSPR	0.9917	LENITNPWSPR	ABP1_HUMAN	LENITNPWSPR	H
GGSSGWSGGLAQN[115]R	0.9913	GGSSGWSGGLAQNR	CO8A_HUMAN	GGSSGWSGGLAQNR	S
FVGTPEVN[115]QTTLYQR	0.9913	FVGTPEVNQTTLYQR	TIMP1_HUMAN	FVGTPEVNQTTLYQR	Y
GSQWSDIEEFCN[115]R	0.9913	GSQWSDIEEFCNR	DAF_HUMAN	GSQWSDIEEFCNR	S
DM[147]SDGFISN[115]LTIQR	0.9913	DMSDGFISNLTIQR	P4HA1_HUMAN	DMSDGFISNLTIQR	Q
LLN[115]CTAPGPDAAAR	0.9913	LLNCTAPGPDAAAR	S15A4_HUMAN	LLNCTAPGPDAAAR	C
FSADLGYN[115]GTR	0.9913	FSADLGYNGTR	PCFT_HUMAN	FSADLGYNGTR	Q
FVN[115]STGYLTEAEK	0.9913	FVNSTGYLTEAEK	SUMF1_HUMAN	FVNSTGYLTEAEK	F
GGGDPWTN[115]GSGLALCQR	0.9913	GGGDPWTNGSGLALCQR	MCLN1_HUMAN	GGGDPWTNGSGLALCQR	Y
LGSQSTN[115]SSYTM[147]NTK	0.9913	LGSQSTNSSYTMNTK	JAM2_HUMAN	LGSQSTNSSYTMNTK	T
IM[147]QDPIQQAEGVYCN[115]R	0.9913	IMQDPIQQAEGVYCNR	CALRL_HUMAN	IMQDPIQQAEGVYCNR	T
LGAIN[115]STLSN[115]QSK	0.9913	LGAINSTLSNQSK	ERO1B_HUMAN	LGAINSTLSNQSK	E
LQGVPHVGAN[115]VTLSCQSPR	0.9913	LQGVPHVGANVTLSCQSPR	ESAM_HUMAN	LQGVPHVGANVTLSCQSPR	S
LM[147]N[115]LTFLDLTR	0.9913	LMNLTFLDLTR	CD180_HUMAN	LMNLTFLDLTR	C
LGN[115]LTVTQAILK	0.9913	LGNLTVTQAILK	STEA4_HUMAN	LGNLTVTQAILK	K
VN[115]GSCEDVDECATGGR	0.9913	VNGSCEDVDECATGGR	LTBP4_HUMAN	VNGSCEDVDECATGGR	C
FN[115]VSLDSVPELR	0.9913	FNVSLDSVPELR	NAAA_HUMAN	FNVSLDSVPELR	W
VFKPPSSTEALN[115]DSQEFPFPETPTK	0.9913	VFKPPSSTEALNDSQEFPFPETPTK	MBRL_HUMAN	VFKPPSSTEALNDSQEFPFPETPTK	V
SVNPN[115]DTCLASCVK	0.9913	SVNPNDTCLASCVK	TSN13_HUMAN	SVNPNDTCLASCVK	S
AGHFQN[115]TSSPSAR	0.9913	AGHFQNTSSPSAR	TNR3_HUMAN	AGHFQNTSSPSAR	C
VDN[115]FTQNPGM[147]FR	0.9913	VDNFTQNPGMFR	MARCO_HUMAN	VDNFTQNPGMFR	I
LVAN[115]ESVPFETSCR	0.9913	LVANESVPFETSCR	P4HTM_HUMAN	LVANESVPFETSCR	Y
VVDAVDGWM[147]LN[115]SSAIR	0.9913	VVDAVDGWMLNSSAIR	GT253_HUMAN	VVDAVDGWMLNSSAIR	N
GVLPGEDWTVFQSN[115]HSTYEPVLLAK	0.9913	GVLPGEDWTVFQSNHSTYEPVLLAK	NDST1_HUMAN	GVLPGEDWTVFQSNHSTYEPVLLAK	T
AIPTIVSDGN[115]TTFQEK	0.9913	AIPTIVSDGNTTFQEK	SC5A1_HUMAN	AIPTIVSDGNTTFQEK	C
VM[147]SWWDYGYQITAM[147]AN[115]R	0.9913	VMSWWDYGYQITAMANR	STT3A_HUMAN	VMSWWDYGYQITAMANR	T
GYYN[115]QSEDGSHTLQWM[147]YGCDLGPDGR	0.9913	GYYNQSEDGSHTLQWMYGCDLGPDGR	1C06_HUMAN	GYYNQSEDGSHTLQWMYGCDLGPDGR	L
AFQLWSN[115]VTPLTFTK	0.9913	AFQLWSNVTPLTFTK	MMP1_HUMAN	AFQLWSNVTPLTFTK	V
PGAASN[115]LSYR	0.9913	PGAASNLSYR	CLC14_HUMAN	PGAASNLSYR	A
YFNIDPN[115]ATQASGNCGTR	0.9913	YFNIDPNATQASGNCGTR	LAMP3_HUMAN	YFNIDPNATQASGNCGTR	K
IVN[115]ETLYENTK	0.9913	IVNETLYENTK	TSN8_HUMAN	IVNETLYENTK	L
LTSPPEPTVM[147]THVPYQVLALYN[115]STR	0.9913	LTSPPEPTVMTHVPYQVLALYNSTR	TGFB3_HUMAN	LTSPPEPTVMTHVPYQVLALYNSTR	E
VIQTSAAN[115]FSLNNSK	0.9913	VIQTSAANFSLNNSK	TM181_HUMAN	VIQTSAANFSLNNSK	K
LVGPSSVVCLPN[115]GTWTGEQPHCR	0.9913	LVGPSSVVCLPNGTWTGEQPHCR	FBLN7_HUMAN	LVGPSSVVCLPNGTWTGEQPHCR	G
YPGIFN[115]STTSDAFLQSK	0.9913	YPGIFNSTTSDAFLQSK	CGT_HUMAN	YPGIFNSTTSDAFLQSK	M
DLCGPDAGPIGN[115]ATGQADCK	0.9913	DLCGPDAGPIGNATGQADCK	S43A3_HUMAN	DLCGPDAGPIGNATGQADCK	A
GPGPFN[115]ETVTEK	0.9913	GPGPFNETVTEK	FNDC1_HUMAN	GPGPFNETVTEK	E
VSANVQN[115]VTTEDVEK	0.9913	VSANVQNVTTEDVEK	PTPR2_HUMAN	VSANVQNVTTEDVEK	A
LPEN[115]QTSPGESPER	0.9913	LPENQTSPGESPER	SCAP_HUMAN	LPENQTSPGESPER	G
VLEVTN[115]SSLR	0.9913	VLEVTNSSLR	CD72_HUMAN	VLEVTNSSLR	Q
YLN[115]LSSTR	0.9913	YLNLSSTR	TLR2_HUMAN	YLNLSSTR	I
ELWN[115]VSNSVQACEER	0.9913	ELWNVSNSVQACEER	MCEM1_HUMAN	ELWNVSNSVQACEER	Q
AFQYDTN[115]CSFR	0.9913	AFQYDTNCSFR	LYAM3_HUMAN	AFQYDTNCSFR	C
YLWSEPQN[115]CSATK	0.9913	YLWSEPQNCSATK	CATH_HUMAN	YLWSEPQNCSATK	S
LFSICQFVDDGIDLN[115]R	0.9913	LFSICQFVDDGIDLNR	TMM59_HUMAN	LFSICQFVDDGIDLNR	T
FSVVYTPVTN[115]TTQQIM[147]NK	0.9913	FSVVYTPVTNTTQQIMNK	ABCA8_HUMAN	FSVVYTPVTNTTQQIMNK	V
VASGEN[115]VTLLCQSWHQIDTFFLTK	0.9913	VASGENVTLLCQSWHQIDTFFLTK	LIRB5_HUMAN	VASGENVTLLCQSWHQIDTFFLTK	E
GN[115]VTQHVQGHR	0.9913	GNVTQHVQGHR	S39AE_HUMAN	GNVTQHVQGHR	N
DCSAN[115]TTSCHILGWGK	0.9913	DCSANTTSCHILGWGK	KLK6_HUMAN	DCSANTTSCHILGWGK	T
GYLTSFEM[147]FN[115]STYK	0.9913	GYLTSFEMFNSTYK	ENTP5_HUMAN	GYLTSFEMFNSTYK	L
LTFSPSTLLVN[115]ITDQVYEYK	0.9913	LTFSPSTLLVNITDQVYEYK	SL9A9_HUMAN	LTFSPSTLLVNITDQVYEYK	Y
EVN[115]CSSPADM[147]DGIQK	0.9913	EVNCSSPADMDGIQK	CR2_HUMAN	EVNCSSPADMDGIQK	G
DCVSN[115]GSLGCPVR	0.9913	DCVSNGSLGCPVR	TMM8A_HUMAN	DCVSNGSLGCPVR	L
M[147]TVGN[115]FSVPVYIR	0.9913	MTVGNFSVPVYIR	LYPD5_HUMAN	MTVGNFSVPVYIR	T
VLN[115]STLITCPSPGALSN[115]ASAPVDFFINGR	0.9913	VLNSTLITCPSPGALSNASAPVDFFINGR	PLXD1_HUMAN	VLNSTLITCPSPGALSNASAPVDFFINGR	A
ILFEGLN[115]ITK	0.9913	ILFEGLNITK	ISK8_HUMAN	ILFEGLNITK	L
AFSN[115]SSYVLNPTTGELVFDPLSASDTGEYSCEAR	0.9913	AFSNSSYVLNPTTGELVFDPLSASDTGEYSCEAR	JAM1_HUMAN	AFSNSSYVLNPTTGELVFDPLSASDTGEYSCEAR	N
KPDPAEQQN[115]VTQVAHSPQGYNTAR	0.9913	KPDPAEQQNVTQVAHSPQGYNTAR	GOLI4_HUMAN	KPDPAEQQNVTQVAHSPQGYNTAR	E
GPGCDELDCGPSN[115]CSQHGLCTETGCR	0.9913	GPGCDELDCGPSNCSQHGLCTETGCR	NAGPA_HUMAN	GPGCDELDCGPSNCSQHGLCTETGCR	C
VWSDVTPLN[115]FTR	0.9913	VWSDVTPLNFTR	MMP13_HUMAN	VWSDVTPLNFTR	L
TELFSSSCPGGIM[147]LN[115]ETGQGYQR	0.9913	TELFSSSCPGGIMLNETGQGYQR	APOM_HUMAN	TELFSSSCPGGIMLNETGQGYQR	F
LDFLM[147]FN[115]YSVPSYLK	0.9913	LDFLMFNYSVPSYLK	CHSTB_HUMAN	LDFLMFNYSVPSYLK	L
AN[115]CSVYESCVDCVLAR	0.9913	ANCSVYESCVDCVLAR	SEM4A_HUMAN	ANCSVYESCVDCVLAR	D
ASM[147]N[115]TSSNPGTPLPLPLR	0.9913	ASMNTSSNPGTPLPLPLR	LRC8B_HUMAN	ASMNTSSNPGTPLPLPLR	I
VYIIAHVPVGYLPSSQN[115]ITAM[147]R	0.9913	VYIIAHVPVGYLPSSQNITAMR	ASM3A_HUMAN	VYIIAHVPVGYLPSSQNITAMR	E
YHSQTYGN[115]GSK	0.9913	YHSQTYGNGSK	OS9_HUMAN	YHSQTYGNGSK	C
EAGQN[115]VTFCCK	0.9913	EAGQNVTFCCK	CILP2_HUMAN	EAGQNVTFCCK	A
ALGDLPHHFN[115]ASTQPAYLR	0.9913	ALGDLPHHFNASTQPAYLR	PERF_HUMAN	ALGDLPHHFNASTQPAYLR	L
WVSLDN[115]WTYSK	0.9913	WVSLDNWTYSK	MANBA_HUMAN	WVSLDNWTYSK	E
GFCAN[115]SSLAFPTK	0.9913	GFCANSSLAFPTK	CHSTC_HUMAN	GFCANSSLAFPTK	E
LIPLGVFTGLSN[115]LTK	0.9913	LIPLGVFTGLSNLTK	LIGO1_HUMAN	LIPLGVFTGLSNLTK	L
LSQDFM[147]ILWLHGEN[115]GTGPAK	0.9913	LSQDFMILWLHGENGTGPAK	NHLC3_HUMAN	LSQDFMILWLHGENGTGPAK	F
QSGVN[115]ATLPEENQPVVFNHVYNIK	0.9912	QSGVNATLPEENQPVVFNHVYNIK	TENA_HUMAN	QSGVNATLPEENQPVVFNHVYNIK	L
HM[147]SLALN[115]R	0.9911	HMSLALNR	AGAL_HUMAN	HMSLALNR	T
GHTN[115]GTKPLDGFDVWK	0.991	GHTNGTKPLDGFDVWK	ARSB_HUMAN	GHTNGTKPLDGFDVWK	T
ICLQVGSQCSTN[115]ESEKPSILVEK	0.991	ICLQVGSQCSTNESEKPSILVEK	I13R1_HUMAN	ICLQVGSQCSTNESEKPSILVEK	C
CIQAN[115]YSLMENGK	0.9907	CIQANYSLMENGK	APOD_HUMAN	CIQANYSLMENGK	I
GLLYAASHSGVVQVPM[147]AN[115]CSLYR	0.9907	GLLYAASHSGVVQVPMANCSLYR	SEM4B_HUMAN	GLLYAASHSGVVQVPMANCSLYR	S
WHPQN[115]STSIWK	0.9906	WHPQNSTSIWK	STS_HUMAN	WHPQNSTSIWK	A
YAVYWN[115]SSNPR	0.9905	YAVYWNSSNPR	EFNA5_HUMAN	YAVYWNSSNPR	F
LN[115]GSLATFSTDQELR	0.9905	LNGSLATFSTDQELR	IDD_HUMAN	LNGSLATFSTDQELR	F
LFHGN[115]YSR	0.9905	LFHGNYSR	GRAH_HUMAN	LFHGNYSR	A
ISM[147]CQNLGYN[115]VTK	0.9905	ISMCQNLGYNVTK	FZD4_HUMAN	ISMCQNLGYNVTK	M
HN[115]ITM[147]CPLCDK	0.9905	HNITMCPLCDK	ANO1_HUMAN	HNITMCPLCDK	T
LLHALGGDDFLGMLN[115]R	0.9902	LLHALGGDDFLGMLNR	PCYOX_HUMAN	LLHALGGDDFLGMLNR	T
VYYN[115]CSCIER	0.9902	VYYNCSCIER	SO4C1_HUMAN	VYYNCSCIER	K
EQYIHEN[115]YSR	0.9896	EQYIHENYSR	PLOD3_HUMAN	EQYIHENYSR	A
LFLN[115]WTEGQK	0.9896	LFLNWTEGQK	PILRA_HUMAN	LFLNWTEGQK	S
GN[115]ETSVLFQR	0.9896	GNETSVLFQR	KCMB1_HUMAN	GNETSVLFQR	L
LGVTN[115]ASLVLFR	0.989	LGVTNASLVLFR	LSAMP_HUMAN	LGVTNASLVLFR	P
AM[147]YVN[115]LTLTGEPIR	0.9889	AMYVNLTLTGEPIR	SORC2_HUMAN	AMYVNLTLTGEPIR	H
EN[115]QSILFTGESGAGK	0.9888	ENQSILFTGESGAGK	MYH15_HUMAN	ENQSILFTGESGAGK	T
N[115]TTEVVNTM[147]CGYK	0.9888	NTTEVVNTMCGYK	TSN15_HUMAN	NTTEVVNTMCGYK	T
IFN[115]GTECGR	0.9888	IFNGTECGR	KLK12_HUMAN	IFNGTECGR	N
YNN[115]NTLLYILHYDIDGPM[147]N[115]CTSDM[147]EINPLR	0.9886	YNNNTLLYILHYDIDGPMNCTSDMEINPLR	ITAV_HUMAN	YNNNTLLYILHYDIDGPMNCTSDMEINPLR	I
IHGQELPFEAVVLN[115]K	0.9883	IHGQELPFEAVVLNK	CSTN2_HUMAN	IHGQELPFEAVVLNK	T
HLN[115]SSHPR	0.9879	HLNSSHPR	TOIP1_HUMAN	HLNSSHPR	S
DQGSAYAN[115]R	0.9878	DQGSAYANR	CD276_HUMAN	DQGSAYANR	T
M[147]N[115]ITSIAPLLEK	0.9873	MNITSIAPLLEK	CASD1_HUMAN	MNITSIAPLLEK	L
SSTSSIDSN[115]ISSK	0.9871	SSTSSIDSNISSK	NAV2_HUMAN	SSTSSIDSNISSK	S
NYNEN[115]LTLIR	0.9871	NYNENLTLIR	ADEC1_HUMAN	NYNENLTLIR	S
ELLETVVN[115]R	0.987	ELLETVVNR	APOC4_HUMAN	ELLETVVNR	T
LGATPVAMLHTNN[115]ATLR	0.9865	LGATPVAMLHTNNATLR	BPIB2_HUMAN	LGATPVAMLHTNNATLR	L
TCDWLPKPN[115]MSASCK	0.9861	TCDWLPKPNMSASCK	SAP_HUMAN	TCDWLPKPNMSASCK	E
LDLPVN[115]TSIPNVTEVK	0.9856	LDLPVNTSIPNVTEVK	ITA1_HUMAN	LDLPVNTSIPNVTEVK	E
GSYPQHIN[115]ISR	0.984	GSYPQHINISR	TLR8_HUMAN	GSYPQHINISR	N
GLVLM[147]PGEN[115]ISLTCSSAHIPFDR	0.9839	GLVLMPGENISLTCSSAHIPFDR	FCAR_HUMAN	GLVLMPGENISLTCSSAHIPFDR	F
AQDGTFSSVLTLTN[115]LTGLDTGEYFCTHN[115]DSR	0.9831	AQDGTFSSVLTLTNLTGLDTGEYFCTHNDSR	PGFRB_HUMAN	AQDGTFSSVLTLTNLTGLDTGEYFCTHNDSR	G
HVYNN[115]LTEEQK	0.9831	HVYNNLTEEQK	CLMP_HUMAN	HVYNNLTEEQK	G
HLELAGENPSSDIN[115]CTK	0.9831	HLELAGENPSSDINCTK	GCNT1_HUMAN	HLELAGENPSSDINCTK	V
APN[115]GTGPLCSGK	0.9831	APNGTGPLCSGK	ITB7_HUMAN	APNGTGPLCSGK	G
VM[147]PN[115]DTFYFSILR	0.9831	VMPNDTFYFSILR	G3ST2_HUMAN	VMPNDTFYFSILR	N
GHEVEDVDLELFN[115]TSVQLQPPTTAPGPETAAFIER	0.9831	GHEVEDVDLELFNTSVQLQPPTTAPGPETAAFIER	EMC10_HUMAN	GHEVEDVDLELFNTSVQLQPPTTAPGPETAAFIER	L
DTN[115]GSQFFITTVK	0.9831	DTNGSQFFITTVK	PPIB_HUMAN	DTNGSQFFITTVK	T
LDVDQALN[115]R	0.9828	LDVDQALNR	SHBG_HUMAN	LDVDQALNR	S
ALNN[115]CSFCHEAGQLGPEIR	0.9827	ALNNCSFCHEAGQLGPEIR	SCAR3_HUMAN	ALNNCSFCHEAGQLGPEIR	K
DICIGN[115]QSNPCVPNNK	0.9821	DICIGNQSNPCVPNNK	NMDE2_HUMAN	DICIGNQSNPCVPNNK	N
FLQPYN[115]ASHLYVCGTYAFQPK	0.9814	FLQPYNASHLYVCGTYAFQPK	SEM4C_HUMAN	FLQPYNASHLYVCGTYAFQPK	C
LLSTEGSQN[115]ITYHCK	0.9813	LLSTEGSQNITYHCK	CO2A1_HUMAN	LLSTEGSQNITYHCK	N
NAN[115]GSYTCEECDSSCVGCTGEGPGNCK	0.9813	NANGSYTCEECDSSCVGCTGEGPGNCK	CREL2_HUMAN	NANGSYTCEECDSSCVGCTGEGPGNCK	E
FLN[115]LSANELQPSLR	0.9812	FLNLSANELQPSLR	TRIL_HUMAN	FLNLSANELQPSLR	H
SLDLSHNLISDFAWSDLHN[115]LSALQLLK	0.9805	SLDLSHNLISDFAWSDLHNLSALQLLK	ISLR_HUMAN	SLDLSHNLISDFAWSDLHNLSALQLLK	M
VN[115]FTLEASEGCYR	0.9804	VNFTLEASEGCYR	PO210_HUMAN	VNFTLEASEGCYR	W
DEGLCSAN[115]VTR	0.9798	DEGLCSANVTR	TFPI2_HUMAN	DEGLCSANVTR	Y
ALNYYPQN[115]ITM[147]K	0.9798	ALNYYPQNITMK	HFE_HUMAN	ALNYYPQNITMK	W
DPYWN[115]DTEPLCR	0.9798	DPYWNDTEPLCR	SE6L1_HUMAN	DPYWNDTEPLCR	A
AN[115]YTILK	0.9795	ANYTILK	DSC2_HUMAN	ANYTILK	G
INQFNLM[147]ASEM[147]IALN[115]R	0.978	INQFNLMASEMIALNR	GALT1_HUMAN	INQFNLMASEMIALNR	S
VLDANDNAPVFN[115]QSLYR	0.9778	VLDANDNAPVFNQSLYR	PCDGK_HUMAN	VLDANDNAPVFNQSLYR	A
GLSHQVIASTLSLLN[115]GSESAK	0.9776	GLSHQVIASTLSLLNGSESAK	SIA7B_HUMAN	GLSHQVIASTLSLLNGSESAK	L
M[147]AAALN[115]ATGR	0.9769	MAAALNATGR	NAGAB_HUMAN	MAAALNATGR	P
LVIPITTAPN[115]ISWSDLSALELLK	0.9748	LVIPITTAPNISWSDLSALELLK	UT1_HUMAN	LVIPITTAPNISWSDLSALELLK	S
VWIN[115]ITEM[147]NK	0.9744	VWINITEMNK	EFC14_HUMAN	VWINITEMNK	Q
GVYELTHNN[115]K	0.9728	GVYELTHNNK	D19L4_HUMAN	GVYELTHNNK	T
LWN[115]FTM[147]NAK	0.9713	LWNFTMNAK	GP126_HUMAN	LWNFTMNAK	I
VGN[115]NTIHVHR	0.9702	VGNNTIHVHR	DKK3_HUMAN	VGNNTIHVHR	E
SDISDQEEDEESEGCPVSIN[115]LSK	0.9676	SDISDQEEDEESEGCPVSINLSK	PCM1_HUMAN	SDISDQEEDEESEGCPVSINLSK	A
ALSN[115]ISLR	0.9662	ALSNISLR	PLXB2_HUMAN	ALSNISLR	L
GYYN[115]QSEAGSHTIQM[147]M[147]YGCHVGSDGR	0.9654	GYYNQSEAGSHTIQMMYGCHVGSDGR	1A29_HUMAN	GYYNQSEAGSHTIQMMYGCHVGSDGR	F
LNVNENVECGN[115]NTCTNNEVHN[115]LTECK	0.9648	LNVNENVECGNNTCTNNEVHNLTECK	PTPRC_HUMAN	LNVNENVECGNNTCTNNEVHNLTECK	N
VLDPDVCN[115]SSWK	0.9635	VLDPDVCNSSWK	PRS57_HUMAN	VLDPDVCNSSWK	G
WTEDNITSSVLFN[115]R	0.963	WTEDNITSSVLFNR	AMPE_HUMAN	WTEDNITSSVLFNR	S
LCN[115]STYR	0.9621	LCNSTYR	CI135_HUMAN	LCNSTYR	R
GCMAN[115]VTVTR	0.9614	GCMANVTVTR	MUC6_HUMAN	GCMANVTVTR	C
VLN[115]FTTK	0.9613	VLNFTTK	CO6_HUMAN	VLNFTTK	A
FEIFYN[115]ISNQSITNK	0.9612	FEIFYNISNQSITNK	ROS1_HUMAN	FEIFYNISNQSITNK	T
M[147]ATPLLM[147]QALPMGALPQGPM[147]QN[115]ATK	0.9608	MATPLLMQALPMGALPQGPMQNATK	HG2A_HUMAN	MATPLLMQALPMGALPQGPMQNATK	Y
LCDN[115]LSTK	0.9605	LCDNLSTK	VTDB_HUMAN	LCDNLSTK	N
TVYVHAN[115]QTGYPDPSSR	0.9603	TVYVHANQTGYPDPSSR	PGCA_HUMAN	TVYVHANQTGYPDPSSR	Y
HIGHAN[115]LTFEQLR	0.9587	HIGHANLTFEQLR	TR11B_HUMAN	HIGHANLTFEQLR	S
LLLTANVSSEN[115]NTPR	0.9586	LLLTANVSSENNTPR	ITAX_HUMAN	LLLTANVSSENNTPR	T
TEGSGNCAFVNPVYGN[115]WSNPEK	0.9556	TEGSGNCAFVNPVYGNWSNPEK	CJ112_HUMAN	TEGSGNCAFVNPVYGNWSNPEK	T
N[115]ISDGFDGIPDNVDAALALPAHSYSGR	0.9517	NISDGFDGIPDNVDAALALPAHSYSGR	VTNC_HUMAN	NISDGFDGIPDNVDAALALPAHSYSGR	E
QLQN[115]ISLAAASGGAK	0.9502	QLQNISLAAASGGAK	DYHC1_HUMAN	QLQNISLAAASGGAK	E
GLLHLEN[115]ASYGIEPLQN[115]SSHFEHIIYR	0.9487	GLLHLENASYGIEPLQNSSHFEHIIYR	ADAM9_HUMAN	GLLHLENASYGIEPLQNSSHFEHIIYR	M
DIMN[115]DSNYIVK	0.9486	DIMNDSNYIVK	CSF1R_HUMAN	DIMNDSNYIVK	G
EAGNHTSGAGLVQIN[115]K	0.9458	EAGNHTSGAGLVQINK	MPRD_HUMAN	EAGNHTSGAGLVQINK	S
LSQAQGN[115]LSVLETR	0.9454	LSQAQGNLSVLETR	IGSF3_HUMAN	LSQAQGNLSVLETR	Q
SN[115]SSMHITDCR	0.9443	SNSSMHITDCR	RNAS1_HUMAN	SNSSMHITDCR	L
M[147]AN[115]GTADVR	0.9398	MANGTADVR	DYHC2_HUMAN	MANGTADVR	K
N[115]SSDETFLK	0.9343	NSSDETFLK	GPNMB_HUMAN	NSSDETFLK	D
HAVYWN[115]SSNQHLR	0.9331	HAVYWNSSNQHLR	EFNA3_HUMAN	HAVYWNSSNQHLR	R
AQVSNEDCLQVEN[115]CTQLGEQCWTAR	0.9331	AQVSNEDCLQVENCTQLGEQCWTAR	PSCA_HUMAN	AQVSNEDCLQVENCTQLGEQCWTAR	I
GAN[115]VSWEPGFDGGYLQR	0.9331	GANVSWEPGFDGGYLQR	TUTLA_HUMAN	GANVSWEPGFDGGYLQR	F
STYN[115]DTEDVSQASPSESEAR	0.9331	STYNDTEDVSQASPSESEAR	LAIR1_HUMAN	STYNDTEDVSQASPSESEAR	F
FCN[115]LTQVPQVLN[115]TTER	0.9331	FCNLTQVPQVLNTTER	TLR5_HUMAN	FCNLTQVPQVLNTTER	L
WGQN[115]CSCHHGGYYNCEDK	0.9331	WGQNCSCHHGGYYNCEDK	FUCO_HUMAN	WGQNCSCHHGGYYNCEDK	F
ISN[115]LTIVQAEIK	0.9331	ISNLTIVQAEIK	IKIP_HUMAN	ISNLTIVQAEIK	D
HFIQDTCLYECSPNLGPWIQQVN[115]QSWR	0.9331	HFIQDTCLYECSPNLGPWIQQVNQSWR	FOLR2_HUMAN	HFIQDTCLYECSPNLGPWIQQVNQSWR	K
GHAHLAALVNHESYN[115]FSHR	0.9331	GHAHLAALVNHESYNFSHR	ERGI2_HUMAN	GHAHLAALVNHESYNFSHR	I
HIEVN[115]GSK	0.9296	HIEVNGSK	FGFR1_HUMAN	HIEVNGSK	I
TLLN[115]ASCDNMLM[147]GIK	0.9294	TLLNASCDNMLMGIK	OLFL1_HUMAN	TLLNASCDNMLMGIK	S
N[115]YTVINSK	0.9294	NYTVINSK	BAI3_HUMAN	NYTVINSK	I
VINTN[115]CSAVR	0.9268	VINTNCSAVR	RFNG_HUMAN	VINTNCSAVR	T
GYVN[115]HSLSVFHTK	0.9268	GYVNHSLSVFHTK	ANO9_HUMAN	GYVNHSLSVFHTK	D
ALM[147]HLN[115]ATLR	0.9259	ALMHLNATLR	MMP23_HUMAN	ALMHLNATLR	G
LNPGN[115]YTAR	0.9256	LNPGNYTAR	IGF1R_HUMAN	LNPGNYTAR	I
LSM[147]LN[115]DSVLWIPAFM[147]VK	0.9249	LSMLNDSVLWIPAFMVK	SIA8D_HUMAN	LSMLNDSVLWIPAFMVK	G
VQEHYN[115]YTK	0.9205	VQEHYNYTK	S1PR2_HUMAN	VQEHYNYTK	E
DDTTQN[115]ITEVAAVK	0.9199	DDTTQNITEVAAVK	K0947_HUMAN	DDTTQNITEVAAVK	S
DPCSVLPSDYDLFIN[115]LSR	0.916	DPCSVLPSDYDLFINLSR	BST1_HUMAN	DPCSVLPSDYDLFINLSR	H
EVLN[115]YTAENICK	0.9147	EVLNYTAENICK	TXD11_HUMAN	EVLNYTAENICK	W
LTSPPEDYPEPEEVPPEVISIYN[115]STR	0.9147	LTSPPEDYPEPEEVPPEVISIYNSTR	TGFB2_HUMAN	LTSPPEDYPEPEEVPPEVISIYNSTR	D
NLM[147]N[115]ASTVVKPSIVPVPFTIM[147]K	0.9112	NLMNASTVVKPSIVPVPFTIMK	ZN844_HUMAN	NLMNASTVVKPSIVPVPFTIMK	G
DN[115]YTDLVAIQNK	0.911	DNYTDLVAIQNK	LYAM1_HUMAN	DNYTDLVAIQNK	A
M[147]EPLN[115]STHPGTAASSSPLESR	0.9103	MEPLNSTHPGTAASSSPLESR	KCNE4_HUMAN	MEPLNSTHPGTAASSSPLESR	A
N[115]ESLTATDGLR	0.9095	NESLTATDGLR	SPD2A_HUMAN	NESLTATDGLR	G
SM[147]VDFM[147]NTDN[115]FTSHR	0.9031	SMVDFMNTDNFTSHR	NOE1_HUMAN	SMVDFMNTDNFTSHR	L
NLGFN[115]CTTSQGK	0.9028	NLGFNCTTSQGK	MA2A2_HUMAN	NLGFNCTTSQGK	V
N[115]ATVVWM[147]K	0.9021	NATVVWMK	CD166_HUMAN	NATVVWMK	D
TTLVDNNTWN[115]NSHIALVGK	0.9021	TTLVDNNTWNNSHIALVGK	STT3B_HUMAN	TTLVDNNTWNNSHIALVGK	A

## Sheet: Identified proteins
Uniprot ID	Protein names	Gene names
1A25_HUMAN	HLA class I histocompatibility antigen, A-25 alpha chain (HLA class I histocompatibility antigen, A-10 alpha chain) (MHC class I antigen A*25)	HLA-A HLAA
1A29_HUMAN	HLA class I histocompatibility antigen, A-29 alpha chain (Aw-19) (MHC class I antigen A*29)	HLA-A HLAA
1A32_HUMAN	HLA class I histocompatibility antigen, A-32 alpha chain (MHC class I antigen A*32)	HLA-A HLAA
1A74_HUMAN	HLA class I histocompatibility antigen, A-74 alpha chain (Aw-19) (Aw-74) (MHC class I antigen A*74)	HLA-A HLAA
1B27_HUMAN	HLA class I histocompatibility antigen, B-27 alpha chain (MHC class I antigen B*27)	HLA-B HLAB
1B37_HUMAN	HLA class I histocompatibility antigen, B-37 alpha chain (MHC class I antigen B*37)	HLA-B HLAB
1B49_HUMAN	HLA class I histocompatibility antigen, B-49 alpha chain (HLA class I histocompatibility antigen, B-21 alpha chain) (MHC class I antigen B*49)	HLA-B HLAB
1B57_HUMAN	HLA class I histocompatibility antigen, B-57 alpha chain (Bw-57) (MHC class I antigen B*57)	HLA-B HLAB
1C01_HUMAN	HLA class I histocompatibility antigen, Cw-1 alpha chain (MHC class I antigen Cw*1)	HLA-C HLAC
1C06_HUMAN	HLA class I histocompatibility antigen, Cw-6 alpha chain (MHC class I antigen Cw*6)	HLA-C HLAC
1C16_HUMAN	HLA class I histocompatibility antigen, Cw-16 alpha chain (MHC class I antigen Cw*16)	HLA-C HLAC
1C17_HUMAN	HLA class I histocompatibility antigen, Cw-17 alpha chain (MHC class I antigen Cw*17)	HLA-C D6S204 HLA-JY3 HLAC
2B14_HUMAN	HLA class II histocompatibility antigen, DRB1-4 beta chain (MHC class II antigen DRB1*4) (DR-4) (DR4)	HLA-DRB1
2B17_HUMAN	HLA class II histocompatibility antigen, DRB1-7 beta chain (MHC class II antigen DRB1*7) (DR-7) (DR7)	HLA-DRB1
4F2_HUMAN	4F2 cell-surface antigen heavy chain (4F2hc) (4F2 heavy chain antigen) (Lymphocyte activation antigen 4F2 large subunit) (CD antigen CD98)	SLC3A2 MDU1
5NTD_HUMAN	5'-nucleotidase (5'-NT) (EC 3.1.3.5) (Ecto-5'-nucleotidase) (CD antigen CD73)	NT5E NT5 NTE
A1AG1_HUMAN	Alpha-1-acid glycoprotein 1 (AGP 1) (Orosomucoid-1) (OMD 1)	ORM1 AGP1
A1AG2_HUMAN	Alpha-1-acid glycoprotein 2 (AGP 2) (Orosomucoid-2) (OMD 2)	ORM2 AGP2
A1AT_HUMAN	Alpha-1-antitrypsin (Alpha-1 protease inhibitor) (Alpha-1-antiproteinase) (Serpin A1) [Cleaved into: Short peptide from AAT (SPAAT)]	SERPINA1 AAT PI PRO0684 PRO2209
A1BG_HUMAN	Alpha-1B-glycoprotein (Alpha-1-B glycoprotein)	A1BG
A2GL_HUMAN	Leucine-rich alpha-2-glycoprotein (LRG)	LRG1 LRG
A2MG_HUMAN	Alpha-2-macroglobulin (Alpha-2-M) (C3 and PZP-like alpha-2-macroglobulin domain-containing protein 5)	A2M CPAMD5 FWP007
A2ML1_HUMAN	Alpha-2-macroglobulin-like protein 1 (C3 and PZP-like alpha-2-macroglobulin domain-containing protein 9)	A2ML1 CPAMD9
AACT_HUMAN	Alpha-1-antichymotrypsin (ACT) (Cell growth-inhibiting gene 24/25 protein) (Serpin A3) [Cleaved into: Alpha-1-antichymotrypsin His-Pro-less]	SERPINA3 AACT GIG24 GIG25
ABCA1_HUMAN	ATP-binding cassette sub-family A member 1 (ATP-binding cassette transporter 1) (ABC-1) (ATP-binding cassette 1) (Cholesterol efflux regulatory protein)	ABCA1 ABC1 CERP
ABCA8_HUMAN	ATP-binding cassette sub-family A member 8	ABCA8 KIAA0822
ABCAC_HUMAN	ATP-binding cassette sub-family A member 12 (ATP-binding cassette transporter 12) (ATP-binding cassette 12)	ABCA12 ABC12
ABP1_HUMAN	Amiloride-sensitive amine oxidase [copper-containing] (DAO) (Diamine oxidase) (EC 1.4.3.22) (Amiloride-binding protein) (ABP) (Histaminase) (Kidney amine oxidase) (KAO)	ABP1 AOC1 DAO1
ACE_HUMAN	Angiotensin-converting enzyme (ACE) (EC 3.2.1.-) (EC 3.4.15.1) (Dipeptidyl carboxypeptidase I) (Kininase II) (CD antigen CD143) [Cleaved into: Angiotensin-converting enzyme, soluble form]	ACE DCP DCP1
ACE2_HUMAN	Angiotensin-converting enzyme 2 (EC 3.4.17.23) (ACE-related carboxypeptidase) (Angiotensin-converting enzyme homolog) (ACEH) (Metalloprotease MPROT15) [Cleaved into: Processed angiotensin-converting enzyme 2]	ACE2 UNQ868/PRO1885
ADA10_HUMAN	Disintegrin and metalloproteinase domain-containing protein 10 (ADAM 10) (EC 3.4.24.81) (CDw156) (Kuzbanian protein homolog) (Mammalian disintegrin-metalloprotease) (CD antigen CD156c)	ADAM10 KUZ MADM
ADA17_HUMAN	Disintegrin and metalloproteinase domain-containing protein 17 (ADAM 17) (EC 3.4.24.86) (Snake venom-like protease) (TNF-alpha convertase) (TNF-alpha-converting enzyme) (CD antigen CD156b)	ADAM17 CSVP TACE
ADAM9_HUMAN	Disintegrin and metalloproteinase domain-containing protein 9 (ADAM 9) (EC 3.4.24.-) (Cellular disintegrin-related protein) (Meltrin-gamma) (Metalloprotease/disintegrin/cysteine-rich protein 9) (Myeloma cell metalloproteinase)	ADAM9 KIAA0021 MCMP MDC9 MLTNG
ADEC1_HUMAN	ADAM DEC1 (EC 3.4.24.-) (A disintegrin and metalloproteinase domain-like protein decysin-1) (ADAM-like protein decysin-1)	ADAMDEC1
AEBP1_HUMAN	Adipocyte enhancer-binding protein 1 (AE-binding protein 1) (Aortic carboxypeptidase-like protein)	AEBP1 ACLP
AFAM_HUMAN	Afamin (Alpha-albumin) (Alpha-Alb)	AFM ALB2 ALBA
AGAL_HUMAN	Alpha-galactosidase A (EC 3.2.1.22) (Alpha-D-galactosidase A) (Alpha-D-galactoside galactohydrolase) (Melibiase) (Agalsidase)	GLA
AGRIN_HUMAN	Agrin [Cleaved into: Agrin N-terminal 110 kDa subunit; Agrin C-terminal 110 kDa subunit; Agrin C-terminal 90 kDa fragment (C90); Agrin C-terminal 22 kDa fragment (C22)]	AGRN AGRIN
AGTR1_HUMAN	Type-1 angiotensin II receptor (AT1AR) (AT1BR) (Angiotensin II type-1 receptor) (AT1)	AGTR1 AGTR1A AGTR1B AT2R1 AT2R1B
ALS_HUMAN	Insulin-like growth factor-binding protein complex acid labile subunit (ALS)	IGFALS ALS
AMPE_HUMAN	Glutamyl aminopeptidase (EAP) (EC 3.4.11.7) (Aminopeptidase A) (AP-A) (Differentiation antigen gp160) (CD antigen CD249)	ENPEP
AMPN_HUMAN	Aminopeptidase N (AP-N) (hAPN) (EC 3.4.11.2) (Alanyl aminopeptidase) (Aminopeptidase M) (AP-M) (Microsomal aminopeptidase) (Myeloid plasma membrane glycoprotein CD13) (gp150) (CD antigen CD13)	ANPEP APN CD13 PEPN
ANGL2_HUMAN	Angiopoietin-related protein 2 (Angiopoietin-like protein 2)	ANGPTL2 ARP2 UNQ170/PRO196
ANGL4_HUMAN	Angiopoietin-related protein 4 (Angiopoietin-like protein 4) (Hepatic fibrinogen/angiopoietin-related protein) (HFARP)	ANGPTL4 ARP4 HFARP PGAR PP1158 PSEC0166 UNQ171/PRO197
ANGP2_HUMAN	Angiopoietin-2 (ANG-2)	ANGPT2
ANGT_HUMAN	Angiotensinogen (Serpin A8) [Cleaved into: Angiotensin-1 (Angiotensin 1-10) (Angiotensin I) (Ang I); Angiotensin-2 (Angiotensin 1-8) (Angiotensin II) (Ang II); Angiotensin-3 (Angiotensin 2-8) (Angiotensin III) (Ang III) (Des-Asp[1]-angiotensin II); Angiotensin-4 (Angiotensin 3-8) (Angiotensin IV) (Ang IV); Angiotensin 1-9; Angiotensin 1-7; Angiotensin 1-5; Angiotensin 1-4]	AGT SERPINA8
ANO1_HUMAN	Anoctamin-1 (Discovered on gastrointestinal stromal tumors protein 1) (Oral cancer overexpressed protein 2) (Transmembrane protein 16A) (Tumor-amplified and overexpressed sequence 2)	ANO1 DOG1 ORAOV2 TAOS2 TMEM16A
ANO6_HUMAN	Anoctamin-6 (Small-conductance calcium-activated nonselective cation channel) (SCAN channel) (Transmembrane protein 16F)	ANO6 TMEM16F
ANO9_HUMAN	Anoctamin-9 (Transmembrane protein 16J) (Tumor protein p53-inducible protein 5) (p53-induced gene 5 protein)	ANO9 PIG5 TMEM16J TP53I5
ANT3_HUMAN	Antithrombin-III (ATIII) (Serpin C1)	SERPINC1 AT3 PRO0309
ANTR1_HUMAN	Anthrax toxin receptor 1 (Tumor endothelial marker 8)	ANTXR1 ATR TEM8
AOC3_HUMAN	Membrane primary amine oxidase (EC 1.4.3.21) (Copper amine oxidase) (HPAO) (Semicarbazide-sensitive amine oxidase) (SSAO) (Vascular adhesion protein 1) (VAP-1)	AOC3 VAP1
APMAP_HUMAN	Adipocyte plasma membrane-associated protein (Protein BSCv)	APMAP C20orf3 UNQ1869/PRO4305
APOB_HUMAN	Apolipoprotein B-100 (Apo B-100) [Cleaved into: Apolipoprotein B-48 (Apo B-48)]	APOB
APOC4_HUMAN	Apolipoprotein C-IV (Apo-CIV) (ApoC-IV) (Apolipoprotein C4)	APOC4
APOD_HUMAN	Apolipoprotein D (Apo-D) (ApoD)	APOD
APOH_HUMAN	Beta-2-glycoprotein 1 (APC inhibitor) (Activated protein C-binding protein) (Anticardiolipin cofactor) (Apolipoprotein H) (Apo-H) (Beta-2-glycoprotein I) (B2GPI) (Beta(2)GPI)	APOH B2G1
APOM_HUMAN	Apolipoprotein M (Apo-M) (ApoM) (Protein G3a)	APOM G3A NG20 HSPC336
ARSB_HUMAN	Arylsulfatase B (ASB) (EC 3.1.6.12) (N-acetylgalactosamine-4-sulfatase) (G4S)	ARSB
ARSD_HUMAN	Arylsulfatase D (ASD) (EC 3.1.6.-)	ARSD
ASAH1_HUMAN	Acid ceramidase (AC) (ACDase) (Acid CDase) (EC 3.5.1.23) (Acylsphingosine deacylase) (N-acylsphingosine amidohydrolase) (Putative 32 kDa heart protein) (PHP32) [Cleaved into: Acid ceramidase subunit alpha; Acid ceramidase subunit beta]	ASAH1 ASAH HSD-33 HSD33
ASM3A_HUMAN	Acid sphingomyelinase-like phosphodiesterase 3a (ASM-like phosphodiesterase 3a) (EC 3.1.4.-)	SMPDL3A ASML3A
ASM3B_HUMAN	Acid sphingomyelinase-like phosphodiesterase 3b (ASM-like phosphodiesterase 3b) (EC 3.1.4.-)	SMPDL3B ASML3B
ASPH_HUMAN	Aspartyl/asparaginyl beta-hydroxylase (EC 1.14.11.16) (Aspartate beta-hydroxylase) (ASP beta-hydroxylase) (Peptide-aspartate beta-dioxygenase)	ASPH
ASPN_HUMAN	Asporin (Periodontal ligament-associated protein 1) (PLAP-1)	ASPN PLAP1 SLRR1C UNQ215/PRO241
AT1B1_HUMAN	Sodium/potassium-transporting ATPase subunit beta-1 (Sodium/potassium-dependent ATPase subunit beta-1)	ATP1B1 ATP1B
AT1B2_HUMAN	Sodium/potassium-transporting ATPase subunit beta-2 (Adhesion molecule in glia) (AMOG) (Sodium/potassium-dependent ATPase subunit beta-2)	ATP1B2
AT1B3_HUMAN	Sodium/potassium-transporting ATPase subunit beta-3 (Sodium/potassium-dependent ATPase subunit beta-3) (ATPB-3) (CD antigen CD298)	ATP1B3
ATF6B_HUMAN	Cyclic AMP-dependent transcription factor ATF-6 beta (cAMP-dependent transcription factor ATF-6 beta) (Activating transcription factor 6 beta) (ATF6-beta) (Protein G13) (cAMP response element-binding protein-related protein) (Creb-rp) (cAMP-responsive element-binding protein-like 1) [Cleaved into: Processed cyclic AMP-dependent transcription factor ATF-6 beta]	ATF6B CREBL1 G13
ATL4_HUMAN	ADAMTS-like protein 4 (ADAMTSL-4) (Thrombospondin repeat-containing protein 1)	ADAMTSL4 TSRC1 PP1396 UNQ2803/PRO34012
ATRN_HUMAN	Attractin (DPPT-L) (Mahogany homolog)	ATRN KIAA0548 MGCA
ATS16_HUMAN	A disintegrin and metalloproteinase with thrombospondin motifs 16 (ADAM-TS 16) (ADAM-TS16) (ADAMTS-16) (EC 3.4.24.-)	ADAMTS16 KIAA2029
B3GN1_HUMAN	N-acetyllactosaminide beta-1,3-N-acetylglucosaminyltransferase (EC 2.4.1.149) (I-beta-1,3-N-acetylglucosaminyltransferase) (iGnT) (Poly-N-acetyllactosamine extension enzyme) (UDP-GlcNAc:betaGal beta-1,3-N-acetylglucosaminyltransferase 1)	B3GNT1 B3GNT6
B3GN2_HUMAN	UDP-GlcNAc:betaGal beta-1,3-N-acetylglucosaminyltransferase 2 (BGnT-2) (Beta-1,3-Gn-T2) (Beta-1,3-N-acetylglucosaminyltransferase 2) (Beta3Gn-T2) (EC 2.4.1.-) (Beta-1,3-N-acetylglucosaminyltransferase 1) (BGnT-1) (Beta-1,3-Gn-T1) (Beta3Gn-T1) (Beta-1,3-galactosyltransferase 7) (Beta-1,3-GalTase 7) (Beta3Gal-T7) (Beta3GalT7) (b3Gal-T7) (Beta-3-Gx-T7) (UDP-Gal:beta-GlcNAc beta-1,3-galactosyltransfe…	B3GNT2 B3GALT7 B3GNT1
B4GT3_HUMAN	Beta-1,4-galactosyltransferase 3 (Beta-1,4-GalTase 3) (Beta4Gal-T3) (b4Gal-T3) (EC 2.4.1.-) (UDP-Gal:beta-GlcNAc beta-1,4-galactosyltransferase 3) (UDP-galactose:beta-N-acetylglucosamine beta-1,4-galactosyltransferase 3) [Includes: N-acetyllactosamine synthase (EC 2.4.1.90) (Nal synthase); Beta-N-acetylglucosaminylglycopeptide beta-1,4-galactosyltransferase (EC 2.4.1.38); Beta-N-acetylglucosaminy…	B4GALT3
BAI3_HUMAN	Brain-specific angiogenesis inhibitor 3	BAI3 KIAA0550
BASI_HUMAN	Basigin (5F7) (Collagenase stimulatory factor) (Extracellular matrix metalloproteinase inducer) (EMMPRIN) (Leukocyte activation antigen M6) (OK blood group antigen) (Tumor cell-derived collagenase stimulatory factor) (TCSF) (CD antigen CD147)	BSG UNQ6505/PRO21383
BCAM_HUMAN	Basal cell adhesion molecule (Auberger B antigen) (B-CAM cell surface glycoprotein) (F8/G253 antigen) (Lutheran antigen) (Lutheran blood group glycoprotein) (CD antigen CD239)	BCAM LU MSK19
BGAL_HUMAN	Beta-galactosidase (EC 3.2.1.23) (Acid beta-galactosidase) (Lactase) (Elastin receptor 1)	GLB1 ELNR1
BGLR_HUMAN	Beta-glucuronidase (EC 3.2.1.31) (Beta-G1)	GUSB
BMP1_HUMAN	Bone morphogenetic protein 1 (BMP-1) (EC 3.4.24.19) (Mammalian tolloid protein) (mTld) (Procollagen C-proteinase) (PCP)	BMP1 PCOLC
BMPR2_HUMAN	Bone morphogenetic protein receptor type-2 (BMP type-2 receptor) (BMPR-2) (EC 2.7.11.30) (Bone morphogenetic protein receptor type II) (BMP type II receptor) (BMPR-II)	BMPR2 PPH1
BPIB1_HUMAN	BPI fold-containing family B member 1 (Long palate, lung and nasal epithelium carcinoma-associated protein 1) (Von Ebner minor salivary gland protein) (VEMSGP)	BPIFB1 C20orf114 LPLUNC1 UNQ706/PRO1357
BPIB2_HUMAN	BPI fold-containing family B member 2 (Bactericidal/permeability-increasing protein-like 1) (BPI-like 1) (Long palate, lung and nasal epithelium carcinoma-associated protein 2) (RYSR)	BPIFB2 BPIL1 C20orf184 LPLUNC2 UNQ2489/PRO5776
BST1_HUMAN	ADP-ribosyl cyclase 2 (EC 3.2.2.5) (Bone marrow stromal antigen 1) (BST-1) (Cyclic ADP-ribose hydrolase 2) (cADPr hydrolase 2) (CD antigen CD157)	BST1
BST2_HUMAN	Bone marrow stromal antigen 2 (BST-2) (HM1.24 antigen) (Tetherin) (CD antigen CD317)	BST2
BTD_HUMAN	Biotinidase (Biotinase) (EC 3.5.1.12)	BTD
C163A_HUMAN	Scavenger receptor cysteine-rich type 1 protein M130 (Hemoglobin scavenger receptor) (CD antigen CD163) [Cleaved into: Soluble CD163 (sCD163)]	CD163 M130
C1QA_HUMAN	Complement C1q subcomponent subunit A	C1QA
C1R_HUMAN	Complement C1r subcomponent (EC 3.4.21.41) (Complement component 1 subcomponent r) [Cleaved into: Complement C1r subcomponent heavy chain; Complement C1r subcomponent light chain]	C1R
C1RL_HUMAN	Complement C1r subcomponent-like protein (C1r-LP) (C1r-like protein) (EC 3.4.21.-) (C1r-like serine protease analog protein) (CLSPa)	C1RL C1RL1 C1RLP CLSPA
C1S_HUMAN	Complement C1s subcomponent (EC 3.4.21.42) (C1 esterase) (Complement component 1 subcomponent s) [Cleaved into: Complement C1s subcomponent heavy chain; Complement C1s subcomponent light chain]	C1S
C4BPB_HUMAN	C4b-binding protein beta chain	C4BPB
CA2D1_HUMAN	Voltage-dependent calcium channel subunit alpha-2/delta-1 (Voltage-gated calcium channel subunit alpha-2/delta-1) [Cleaved into: Voltage-dependent calcium channel subunit alpha-2-1; Voltage-dependent calcium channel subunit delta-1]	CACNA2D1 CACNL2A CCHL2A MHS3
CA2D2_HUMAN	Voltage-dependent calcium channel subunit alpha-2/delta-2 (Voltage-gated calcium channel subunit alpha-2/delta-2) [Cleaved into: Voltage-dependent calcium channel subunit alpha-2-2; Voltage-dependent calcium channel subunit delta-2]	CACNA2D2 KIAA0558
CAD13_HUMAN	Cadherin-13 (Heart cadherin) (H-cadherin) (P105) (Truncated cadherin) (T-cad) (T-cadherin)	CDH13 CDHH
CADH5_HUMAN	Cadherin-5 (7B4 antigen) (Vascular endothelial cadherin) (VE-cadherin) (CD antigen CD144)	CDH5
CADM1_HUMAN	Cell adhesion molecule 1 (Immunoglobulin superfamily member 4) (IgSF4) (Nectin-like protein 2) (NECL-2) (Spermatogenic immunoglobulin superfamily) (SgIgSF) (Synaptic cell adhesion molecule) (SynCAM) (Tumor suppressor in lung cancer 1) (TSLC-1)	CADM1 IGSF4 IGSF4A NECL2 SYNCAM TSLC1
CADM3_HUMAN	Cell adhesion molecule 3 (Brain immunoglobulin receptor) (Immunoglobulin superfamily member 4B) (IgSF4B) (Nectin-like protein 1) (NECL-1) (Synaptic cell adhesion molecule 3) (SynCAM3) (TSLC1-like protein 1) (TSLL1)	CADM3 IGSF4B NECL1 SYNCAM3 TSLL1 UNQ225/PRO258
CALRL_HUMAN	Calcitonin gene-related peptide type 1 receptor (CGRP type 1 receptor) (Calcitonin receptor-like receptor)	CALCRL CGRPR
CANT1_HUMAN	Soluble calcium-activated nucleotidase 1 (SCAN-1) (EC 3.6.1.6) (Apyrase homolog) (Putative MAPK-activating protein PM09) (Putative NF-kappa-B-activating protein 107)	CANT1 SHAPY
CAP7_HUMAN	Azurocidin (Cationic antimicrobial protein CAP37) (Heparin-binding protein) (HBP)	AZU1
CASC4_HUMAN	Protein CASC4 (Cancer susceptibility candidate gene 4 protein)	CASC4 UNQ2573/PRO6308
CASD1_HUMAN	CAS1 domain-containing protein 1	CASD1 C7orf12 Nbla04196
CATC_HUMAN	Dipeptidyl peptidase 1 (EC 3.4.14.1) (Cathepsin C) (Cathepsin J) (Dipeptidyl peptidase I) (DPP-I) (DPPI) (Dipeptidyl transferase) [Cleaved into: Dipeptidyl peptidase 1 exclusion domain chain (Dipeptidyl peptidase I exclusion domain chain); Dipeptidyl peptidase 1 heavy chain (Dipeptidyl peptidase I heavy chain); Dipeptidyl peptidase 1 light chain (Dipeptidyl peptidase I light chain)]	CTSC CPPI
CATD_HUMAN	Cathepsin D (EC 3.4.23.5) [Cleaved into: Cathepsin D light chain; Cathepsin D heavy chain]	CTSD CPSD
CATF_HUMAN	Cathepsin F (CATSF) (EC 3.4.22.41)	CTSF
CATH_HUMAN	Pro-cathepsin H [Cleaved into: Cathepsin H mini chain; Cathepsin H (EC 3.4.22.16); Cathepsin H heavy chain; Cathepsin H light chain]	CTSH CPSB
CATL1_HUMAN	Cathepsin L1 (EC 3.4.22.15) (Major excreted protein) (MEP) [Cleaved into: Cathepsin L1 heavy chain; Cathepsin L1 light chain]	CTSL1 CTSL
CBG_HUMAN	Corticosteroid-binding globulin (CBG) (Serpin A6) (Transcortin)	SERPINA6 CBG
CBPA3_HUMAN	Mast cell carboxypeptidase A (MC-CPA) (EC 3.4.17.1) (Carboxypeptidase A3)	CPA3
CBPD_HUMAN	Carboxypeptidase D (EC 3.4.17.22) (Metallocarboxypeptidase D) (gp180)	CPD
CBPE_HUMAN	Carboxypeptidase E (CPE) (EC 3.4.17.10) (Carboxypeptidase H) (CPH) (Enkephalin convertase) (Prohormone-processing carboxypeptidase)	CPE
CBPM_HUMAN	Carboxypeptidase M (CPM) (EC 3.4.17.12)	CPM
CBPQ_HUMAN	Carboxypeptidase Q (EC 3.4.17.-) (Lysosomal dipeptidase) (Plasma glutamate carboxypeptidase)	CPQ LCH1 PGCP
CC50A_HUMAN	Cell cycle control protein 50A (Transmembrane protein 30A)	TMEM30A C6orf67 CDC50A
CCD80_HUMAN	Coiled-coil domain-containing protein 80 (Down-regulated by oncogenes protein 1) (Up-regulated in BRS-3 deficient mouse homolog)	CCDC80 DRO1 URB HBE245
CD109_HUMAN	CD109 antigen (150 kDa TGF-beta-1-binding protein) (C3 and PZP-like alpha-2-macroglobulin domain-containing protein 7) (Platelet-specific Gov antigen) (p180) (r150) (CD antigen CD109)	CD109 CPAMD7
CD151_HUMAN	CD151 antigen (GP27) (Membrane glycoprotein SFA-1) (Platelet-endothelial tetraspan antigen 3) (PETA-3) (Tetraspanin-24) (Tspan-24) (CD antigen CD151)	CD151 TSPAN24
CD166_HUMAN	CD166 antigen (Activated leukocyte cell adhesion molecule) (CD antigen CD166)	ALCAM MEMD
CD177_HUMAN	CD177 antigen (Human neutrophil alloantigen 2a) (HNA-2a) (NB1 glycoprotein) (NB1 GP) (Polycythemia rubra vera protein 1) (PRV-1) (CD antigen CD177)	CD177 NB1 PRV1 UNQ595/PRO1181
CD180_HUMAN	CD180 antigen (Lymphocyte antigen 64) (Radioprotective 105 kDa protein) (CD antigen CD180)	CD180 LY64 RP105
CD276_HUMAN	CD276 antigen (4Ig-B7-H3) (B7 homolog 3) (B7-H3) (Costimulatory molecule) (CD antigen CD276)	CD276 B7H3 PSEC0249 UNQ309/PRO352
CD34_HUMAN	Hematopoietic progenitor cell antigen CD34 (CD antigen CD34)	CD34
CD36_HUMAN	Platelet glycoprotein 4 (Fatty acid translocase) (FAT) (Glycoprotein IIIb) (GPIIIB) (Leukocyte differentiation antigen CD36) (PAS IV) (PAS-4) (Platelet collagen receptor) (Platelet glycoprotein IV) (GPIV) (Thrombospondin receptor) (CD antigen CD36)	CD36 GP3B GP4
CD38_HUMAN	ADP-ribosyl cyclase 1 (EC 3.2.2.5) (Cyclic ADP-ribose hydrolase 1) (cADPr hydrolase 1) (T10) (CD antigen CD38)	CD38
CD44_HUMAN	CD44 antigen (CDw44) (Epican) (Extracellular matrix receptor III) (ECMR-III) (GP90 lymphocyte homing/adhesion receptor) (HUTCH-I) (Heparan sulfate proteoglycan) (Hermes antigen) (Hyaluronate receptor) (Phagocytic glycoprotein 1) (PGP-1) (Phagocytic glycoprotein I) (PGP-I) (CD antigen CD44)	CD44 LHR MDU2 MDU3 MIC4
CD47_HUMAN	Leukocyte surface antigen CD47 (Antigenic surface determinant protein OA3) (Integrin-associated protein) (IAP) (Protein MER6) (CD antigen CD47)	CD47 MER6
CD48_HUMAN	CD48 antigen (B-lymphocyte activation marker BLAST-1) (BCM1 surface antigen) (Leukocyte antigen MEM-102) (SLAM family member 2) (SLAMF2) (Signaling lymphocytic activation molecule 2) (TCT.1) (CD antigen CD48)	CD48 BCM1 BLAST1
CD5_HUMAN	T-cell surface glycoprotein CD5 (Lymphocyte antigen T1/Leu-1) (CD antigen CD5)	CD5 LEU1
CD59_HUMAN	CD59 glycoprotein (1F5 antigen) (20 kDa homologous restriction factor) (HRF-20) (HRF20) (MAC-inhibitory protein) (MAC-IP) (MEM43 antigen) (Membrane attack complex inhibition factor) (MACIF) (Membrane inhibitor of reactive lysis) (MIRL) (Protectin) (CD antigen CD59)	CD59 MIC11 MIN1 MIN2 MIN3 MSK21
CD6_HUMAN	T-cell differentiation antigen CD6 (T12) (TP120) (CD antigen CD6)	CD6
CD63_HUMAN	CD63 antigen (Granulophysin) (Lysosomal-associated membrane protein 3) (LAMP-3) (Melanoma-associated antigen ME491) (OMA81H) (Ocular melanoma-associated antigen) (Tetraspanin-30) (Tspan-30) (CD antigen CD63)	CD63 MLA1 TSPAN30
CD68_HUMAN	Macrosialin (Gp110) (CD antigen CD68)	CD68
CD7_HUMAN	T-cell antigen CD7 (GP40) (T-cell leukemia antigen) (T-cell surface antigen Leu-9) (TP41) (CD antigen CD7)	CD7
CD72_HUMAN	B-cell differentiation antigen CD72 (Lyb-2) (CD antigen CD72)	CD72
CD82_HUMAN	CD82 antigen (C33 antigen) (IA4) (Inducible membrane protein R2) (Metastasis suppressor Kangai-1) (Suppressor of tumorigenicity 6 protein) (Tetraspanin-27) (Tspan-27) (CD antigen CD82)	CD82 KAI1 SAR2 ST6 TSPAN27
CD97_HUMAN	CD97 antigen (Leukocyte antigen CD97) (CD antigen CD97) [Cleaved into: CD97 antigen subunit alpha; CD97 antigen subunit beta]	CD97
CDCP1_HUMAN	CUB domain-containing protein 1 (Membrane glycoprotein gp140) (Subtractive immunization M plus HEp3-associated 135 kDa protein) (SIMA135) (Transmembrane and associated with src kinases) (CD antigen CD318)	CDCP1 TRASK UNQ2486/PRO5773
CEAM1_HUMAN	Carcinoembryonic antigen-related cell adhesion molecule 1 (Biliary glycoprotein 1) (BGP-1) (CD antigen CD66a)	CEACAM1 BGP BGP1
CEAM5_HUMAN	Carcinoembryonic antigen-related cell adhesion molecule 5 (Carcinoembryonic antigen) (CEA) (Meconium antigen 100) (CD antigen CD66e)	CEACAM5 CEA
CEAM6_HUMAN	Carcinoembryonic antigen-related cell adhesion molecule 6 (Non-specific crossreacting antigen) (Normal cross-reacting antigen) (CD antigen CD66c)	CEACAM6 NCA
CEAM8_HUMAN	Carcinoembryonic antigen-related cell adhesion molecule 8 (CD67 antigen) (Carcinoembryonic antigen CGM6) (Non-specific cross-reacting antigen NCA-95) (CD antigen CD66b)	CEACAM8 CGM6
CECR1_HUMAN	Adenosine deaminase CECR1 (EC 3.5.4.4) (Cat eye syndrome critical region protein 1)	CECR1 ADA2 ADGF IDGFL
CELR1_HUMAN	Cadherin EGF LAG seven-pass G-type receptor 1 (Cadherin family member 9) (Flamingo homolog 2) (hFmi2)	CELSR1 CDHF9 FMI2
CELR2_HUMAN	Cadherin EGF LAG seven-pass G-type receptor 2 (Cadherin family member 10) (Epidermal growth factor-like protein 2) (EGF-like protein 2) (Flamingo homolog 3) (Multiple epidermal growth factor-like domains protein 3) (Multiple EGF-like domains protein 3)	CELSR2 CDHF10 EGFL2 KIAA0279 MEGF3
CERS2_HUMAN	Ceramide synthase 2 (CerS2) (LAG1 longevity assurance homolog 2) (SP260) (Tumor metastasis-suppressor gene 1 protein)	CERS2 LASS2 TMSG1
CERS6_HUMAN	Ceramide synthase 6 (CerS5) (LAG1 longevity assurance homolog 6)	CERS6 LASS6
CERU_HUMAN	Ceruloplasmin (EC 1.16.3.1) (Ferroxidase)	CP
CFAB_HUMAN	Complement factor B (EC 3.4.21.47) (C3/C5 convertase) (Glycine-rich beta glycoprotein) (GBG) (PBF2) (Properdin factor B) [Cleaved into: Complement factor B Ba fragment; Complement factor B Bb fragment]	CFB BF BFD
CFAH_HUMAN	Complement factor H (H factor 1)	CFH HF HF1 HF2
CFAI_HUMAN	Complement factor I (EC 3.4.21.45) (C3B/C4B inactivator) [Cleaved into: Complement factor I heavy chain; Complement factor I light chain]	CFI IF
CGT_HUMAN	2-hydroxyacylsphingosine 1-beta-galactosyltransferase (EC 2.4.1.45) (Ceramide UDP-galactosyltransferase) (Cerebroside synthase) (UDP-galactose-ceramide galactosyltransferase)	UGT8 CGT UGT4
CHL1_HUMAN	Neural cell adhesion molecule L1-like protein (Close homolog of L1) [Cleaved into: Processed neural cell adhesion molecule L1-like protein]	CHL1 CALL
CHLE_HUMAN	Cholinesterase (EC 3.1.1.8) (Acylcholine acylhydrolase) (Butyrylcholine esterase) (Choline esterase II) (Pseudocholinesterase)	BCHE CHE1
CHSTB_HUMAN	Carbohydrate sulfotransferase 11 (EC 2.8.2.5) (Chondroitin 4-O-sulfotransferase 1) (Chondroitin 4-sulfotransferase 1) (C4S-1) (C4ST-1) (C4ST1)	CHST11
CHSTC_HUMAN	Carbohydrate sulfotransferase 12 (EC 2.8.2.5) (Chondroitin 4-O-sulfotransferase 2) (Chondroitin 4-sulfotransferase 2) (C4ST-2) (C4ST2) (Sulfotransferase Hlo)	CHST12 UNQ500/PRO1017
CI135_HUMAN	Uncharacterized protein C9orf135	C9orf135
CIC_HUMAN	Protein capicua homolog	CIC KIAA0306
CILP1_HUMAN	Cartilage intermediate layer protein 1 (CILP-1) (Cartilage intermediate-layer protein) [Cleaved into: Cartilage intermediate layer protein 1 C1; Cartilage intermediate layer protein 1 C2]	CILP UNQ602/PRO1188
CILP2_HUMAN	Cartilage intermediate layer protein 2 (CILP-2) [Cleaved into: Cartilage intermediate layer protein 2 C1; Cartilage intermediate layer protein 2 C2]	CILP2
CJ112_HUMAN	MAM and LDL-receptor class A domain-containing protein C10orf112	C10orf112
CL12A_HUMAN	C-type lectin domain family 12 member A (C-type lectin-like molecule 1) (CLL-1) (Dendritic cell-associated lectin 2) (DCAL-2) (Myeloid inhibitory C-type lectin-like receptor) (MICL)	CLEC12A CLL1 DCAL2 MICL
CLC14_HUMAN	C-type lectin domain family 14 member A (Epidermal growth factor receptor 5) (EGFR-5)	CLEC14A C14orf27 EGFR5 UNQ236/PRO269
CLCA2_HUMAN	Calcium-activated chloride channel regulator 2 (Calcium-activated chloride channel family member 2) (hCLCA2) (Calcium-activated chloride channel protein 3) (CaCC-3) (hCaCC-3) [Cleaved into: Calcium-activated chloride channel regulator 2, 109 kDa form; Calcium-activated chloride channel regulator 2, 35 kDa form]	CLCA2 CACC3
CLMP_HUMAN	CXADR-like membrane protein (Adipocyte adhesion molecule) (Coxsackie- and adenovirus receptor-like membrane protein) (CAR-like membrane protein)	CLMP ACAM ASAM UNQ318/PRO363
CLN5_HUMAN	Ceroid-lipofuscinosis neuronal protein 5 (Protein CLN5)	CLN5
CLPT1_HUMAN	Cleft lip and palate transmembrane protein 1	CLPTM1
CLUS_HUMAN	Clusterin (Aging-associated gene 4 protein) (Apolipoprotein J) (Apo-J) (Complement cytolysis inhibitor) (CLI) (Complement-associated protein SP-40,40) (Ku70-binding protein 1) (NA1/NA2) (Testosterone-repressed prostate message 2) (TRPM-2) [Cleaved into: Clusterin beta chain (ApoJalpha) (Complement cytolysis inhibitor a chain); Clusterin alpha chain (ApoJbeta) (Complement cytolysis inhibitor b cha…	CLU APOJ CLI KUB1 AAG4
CMA1_HUMAN	Chymase (EC 3.4.21.39) (Alpha-chymase) (Mast cell protease I)	CMA1 CYH CYM
CNDP1_HUMAN	Beta-Ala-His dipeptidase (EC 3.4.13.20) (CNDP dipeptidase 1) (Carnosine dipeptidase 1) (Glutamate carboxypeptidase-like protein 2) (Serum carnosinase)	CNDP1 CN1 CPGL2 UNQ1915/PRO4380
CNN3_HUMAN	Calponin-3 (Calponin, acidic isoform)	CNN3
CNPY3_HUMAN	Protein canopy homolog 3 (CTG repeat protein 4a) (Expanded repeat-domain protein CAG/CTG 5) (Protein associated with TLR4) (Trinucleotide repeat-containing gene 5 protein)	CNPY3 CTG4A ERDA5 PRAT4A TNRC5 HSPC084 UNQ1934/PRO4409
CO1A1_HUMAN	Collagen alpha-1(I) chain (Alpha-1 type I collagen)	COL1A1
CO1A2_HUMAN	Collagen alpha-2(I) chain (Alpha-2 type I collagen)	COL1A2
CO2_HUMAN	Complement C2 (EC 3.4.21.43) (C3/C5 convertase) [Cleaved into: Complement C2b fragment; Complement C2a fragment]	C2
CO2A1_HUMAN	Collagen alpha-1(II) chain (Alpha-1 type II collagen) [Cleaved into: Collagen alpha-1(II) chain; Chondrocalcin]	COL2A1
CO3_HUMAN	Complement C3 (C3 and PZP-like alpha-2-macroglobulin domain-containing protein 1) [Cleaved into: Complement C3 beta chain; Complement C3 alpha chain; C3a anaphylatoxin; Acylation stimulating protein (ASP) (C3adesArg); Complement C3b alpha' chain; Complement C3c alpha' chain fragment 1; Complement C3dg fragment; Complement C3g fragment; Complement C3d fragment; Complement C3f fragment; Complement …	C3 CPAMD1
CO3A1_HUMAN	Collagen alpha-1(III) chain	COL3A1
CO5A1_HUMAN	Collagen alpha-1(V) chain	COL5A1
CO5A2_HUMAN	Collagen alpha-2(V) chain	COL5A2
CO5A3_HUMAN	Collagen alpha-3(V) chain	COL5A3
CO6_HUMAN	Complement component C6	C6
CO6A1_HUMAN	Collagen alpha-1(VI) chain	COL6A1
CO6A2_HUMAN	Collagen alpha-2(VI) chain	COL6A2
CO6A3_HUMAN	Collagen alpha-3(VI) chain	COL6A3
CO6A6_HUMAN	Collagen alpha-6(VI) chain	COL6A6
CO8A_HUMAN	Complement component C8 alpha chain (Complement component 8 subunit alpha)	C8A
CO9_HUMAN	Complement component C9 [Cleaved into: Complement component C9a; Complement component C9b]	C9
COBA1_HUMAN	Collagen alpha-1(XI) chain	COL11A1 COLL6
COCA1_HUMAN	Collagen alpha-1(XII) chain	COL12A1 COL12A1L
COEA1_HUMAN	Collagen alpha-1(XIV) chain (Undulin)	COL14A1 UND
COGA1_HUMAN	Collagen alpha-1(XVI) chain	COL16A1 FP1572
COL12_HUMAN	Collectin-12 (Collectin placenta protein 1) (CL-P1) (hCL-P1) (Nurse cell scavenger receptor 2) (Scavenger receptor class A member 4) (Scavenger receptor with C-type lectin)	COLEC12 CLP1 NSR2 SCARA4 SRCL
CPN2_HUMAN	Carboxypeptidase N subunit 2 (Carboxypeptidase N 83 kDa chain) (Carboxypeptidase N large subunit) (Carboxypeptidase N polypeptide 2) (Carboxypeptidase N regulatory subunit)	CPN2 ACBP
CPXM2_HUMAN	Inactive carboxypeptidase-like protein X2	CPXM2 UNQ676/PRO1310
CR2_HUMAN	Complement receptor type 2 (Cr2) (Complement C3d receptor) (Epstein-Barr virus receptor) (EBV receptor) (CD antigen CD21)	CR2 C3DR
CREG1_HUMAN	Protein CREG1 (Cellular repressor of E1A-stimulated genes 1)	CREG1 CREG UNQ727/PRO1409
CREL2_HUMAN	Cysteine-rich with EGF-like domain protein 2	CRELD2 UNQ185/PRO211
CRLF1_HUMAN	Cytokine receptor-like factor 1 (Cytokine-like factor 1) (CLF-1) (ZcytoR5)	CRLF1 UNQ288/PRO327
CSF1R_HUMAN	Macrophage colony-stimulating factor 1 receptor (CSF-1 receptor) (CSF-1-R) (CSF-1R) (M-CSF-R) (EC 2.7.10.1) (Proto-oncogene c-Fms) (CD antigen CD115)	CSF1R FMS
CSPG2_HUMAN	Versican core protein (Chondroitin sulfate proteoglycan core protein 2) (Chondroitin sulfate proteoglycan 2) (Glial hyaluronate-binding protein) (GHAP) (Large fibroblast proteoglycan) (PG-M)	VCAN CSPG2
CSPG4_HUMAN	Chondroitin sulfate proteoglycan 4 (Chondroitin sulfate proteoglycan NG2) (Melanoma chondroitin sulfate proteoglycan) (Melanoma-associated chondroitin sulfate proteoglycan)	CSPG4 MCSP
CSTN2_HUMAN	Calsyntenin-2 (Alcadein-gamma) (Alc-gamma)	CLSTN2 CS2
CTL1_HUMAN	Choline transporter-like protein 1 (CDw92) (Solute carrier family 44 member 1) (CD antigen CD92)	SLC44A1 CD92 CDW92 CTL1
CTL2_HUMAN	Choline transporter-like protein 2 (Solute carrier family 44 member 2)	SLC44A2 CTL2 PSEC0210
CTL4_HUMAN	Choline transporter-like protein 4 (Solute carrier family 44 member 4)	SLC44A4 C6orf29 CTL4 NG22 UNQ441/PRO874
CTR1_HUMAN	High affinity cationic amino acid transporter 1 (CAT-1) (CAT1) (Ecotropic retroviral leukemia receptor homolog) (Ecotropic retrovirus receptor homolog) (ERR) (Solute carrier family 7 member 1) (System Y+ basic amino acid transporter)	SLC7A1 ATRC1 ERR REC1L
CY24B_HUMAN	Cytochrome b-245 heavy chain (EC 1.-.-.-) (CGD91-phox) (Cytochrome b(558) subunit beta) (Cytochrome b558 subunit beta) (Heme-binding membrane glycoprotein gp91phox) (NADPH oxidase 2) (Neutrophil cytochrome b 91 kDa polypeptide) (Superoxide-generating NADPH oxidase heavy chain subunit) (gp91-1) (gp91-phox) (p22 phagocyte B-cytochrome)	CYBB NOX2
D19L4_HUMAN	Probable C-mannosyltransferase DPY19L4 (EC 2.4.1.-) (Dpy-19-like protein 4) (Protein dpy-19 homolog 4)	DPY19L4
DAF_HUMAN	Complement decay-accelerating factor (CD antigen CD55)	CD55 CR DAF
DKK3_HUMAN	Dickkopf-related protein 3 (Dickkopf-3) (Dkk-3) (hDkk-3)	DKK3 REIC UNQ258/PRO295
DMB_HUMAN	HLA class II histocompatibility antigen, DM beta chain (MHC class II antigen DMB) (Really interesting new gene 7 protein)	HLA-DMB DMB RING7
DNER_HUMAN	Delta and Notch-like epidermal growth factor-related receptor	DNER BET UNQ262/PRO299
DPA1_HUMAN	HLA class II histocompatibility antigen, DP alpha 1 chain (DP(W3)) (DP(W4)) (HLA-SB alpha chain) (MHC class II DP3-alpha) (MHC class II DPA1)	HLA-DPA1 HLA-DP1A HLASB
DPB1_HUMAN	HLA class II histocompatibility antigen, DP beta 1 chain (HLA class II histocompatibility antigen, DP(W4) beta chain) (MHC class II antigen DPB1)	HLA-DPB1 HLA-DP1B
DPEP1_HUMAN	Dipeptidase 1 (EC 3.4.13.19) (Dehydropeptidase-I) (Microsomal dipeptidase) (Renal dipeptidase) (hRDP)	DPEP1 MDP RDP
DPP2_HUMAN	Dipeptidyl peptidase 2 (EC 3.4.14.2) (Dipeptidyl aminopeptidase II) (Dipeptidyl peptidase 7) (Dipeptidyl peptidase II) (DPP II) (Quiescent cell proline dipeptidase)	DPP7 DPP2 QPP
DPP4_HUMAN	Dipeptidyl peptidase 4 (EC 3.4.14.5) (ADABP) (Adenosine deaminase complexing protein 2) (ADCP-2) (Dipeptidyl peptidase IV) (DPP IV) (T-cell activation antigen CD26) (TP103) (CD antigen CD26) [Cleaved into: Dipeptidyl peptidase 4 membrane form (Dipeptidyl peptidase IV membrane form); Dipeptidyl peptidase 4 soluble form (Dipeptidyl peptidase IV soluble form)]	DPP4 ADCP2 CD26
DQA1_HUMAN	HLA class II histocompatibility antigen, DQ alpha 1 chain (DC-1 alpha chain) (DC-alpha) (HLA-DCA) (MHC class II DQA1)	HLA-DQA1
DQB1_HUMAN	HLA class II histocompatibility antigen, DQ beta 1 chain (MHC class II antigen DQB1)	HLA-DQB1 HLA-DQB
DQB2_HUMAN	HLA class II histocompatibility antigen, DQ beta 2 chain (HLA class II histocompatibility antigen, DX beta chain) (MHC class II antigen DQB2)	HLA-DQB2 HLA-DXB
DRA_HUMAN	HLA class II histocompatibility antigen, DR alpha chain (MHC class II antigen DRA)	HLA-DRA HLA-DRA1
DRB3_HUMAN	HLA class II histocompatibility antigen, DR beta 3 chain (MHC class II antigen DRB3)	HLA-DRB3
DRB5_HUMAN	HLA class II histocompatibility antigen, DR beta 5 chain (DR beta-5) (DR2-beta-2) (Dw2) (MHC class II antigen DRB5)	HLA-DRB5
DSC2_HUMAN	Desmocollin-2 (Cadherin family member 2) (Desmocollin-3) (Desmosomal glycoprotein II) (Desmosomal glycoprotein III)	DSC2 CDHF2 DSC3
DSG2_HUMAN	Desmoglein-2 (Cadherin family member 5) (HDGC)	DSG2 CDHF5
DSG3_HUMAN	Desmoglein-3 (130 kDa pemphigus vulgaris antigen) (PVA) (Cadherin family member 6)	DSG3 CDHF6
DYHC1_HUMAN	Cytoplasmic dynein 1 heavy chain 1 (Cytoplasmic dynein heavy chain 1) (Dynein heavy chain, cytosolic)	DYNC1H1 DHC1 DNCH1 DNCL DNECL DYHC KIAA0325
DYHC2_HUMAN	Cytoplasmic dynein 2 heavy chain 1 (Cytoplasmic dynein 2 heavy chain) (Dynein cytoplasmic heavy chain 2) (Dynein heavy chain 11) (hDHC11) (Dynein heavy chain isotype 1B)	DYNC2H1 DHC1B DHC2 DNCH2 DYH1B KIAA1997
EAA1_HUMAN	Excitatory amino acid transporter 1 (Sodium-dependent glutamate/aspartate transporter 1) (GLAST-1) (Solute carrier family 1 member 3)	SLC1A3 EAAT1 GLAST GLAST1
ECE1_HUMAN	Endothelin-converting enzyme 1 (ECE-1) (EC 3.4.24.71)	ECE1
ECM2_HUMAN	Extracellular matrix protein 2 (Matrix glycoprotein SC1/ECM2)	ECM2
EDEM3_HUMAN	ER degradation-enhancing alpha-mannosidase-like protein 3 (EC 3.2.1.113) (Alpha-1,2-mannosidase EDEM3)	EDEM3 C1orf22
EFC14_HUMAN	EF-hand calcium-binding domain-containing protein 14	EFCAB14 KIAA0494
EFNA3_HUMAN	Ephrin-A3 (EFL-2) (EHK1 ligand) (EHK1-L) (EPH-related receptor tyrosine kinase ligand 3) (LERK-3)	EFNA3 EFL2 EPLG3 LERK3
EFNA4_HUMAN	Ephrin-A4 (EPH-related receptor tyrosine kinase ligand 4) (LERK-4)	EFNA4 EPLG4 LERK4
EFNA5_HUMAN	Ephrin-A5 (AL-1) (EPH-related receptor tyrosine kinase ligand 7) (LERK-7)	EFNA5 EPLG7 LERK7
EGFR_HUMAN	Epidermal growth factor receptor (EC 2.7.10.1) (Proto-oncogene c-ErbB-1) (Receptor tyrosine-protein kinase erbB-1)	EGFR ERBB ERBB1 HER1
ELNE_HUMAN	Neutrophil elastase (EC 3.4.21.37) (Bone marrow serine protease) (Elastase-2) (Human leukocyte elastase) (HLE) (Medullasin) (PMN elastase)	ELANE ELA2
EMB_HUMAN	Embigin	EMB
EMC1_HUMAN	ER membrane protein complex subunit 1	EMC1 KIAA0090 PSEC0263
EMC10_HUMAN	ER membrane protein complex subunit 10 (Hematopoietic signal peptide-containing membrane domain-containing protein 1)	EMC10 C19orf63 HSM1 INM02 UNQ764/PRO1556
EMIL1_HUMAN	EMILIN-1 (Elastin microfibril interface-located protein 1) (Elastin microfibril interfacer 1)	EMILIN1 EMI
EMIL2_HUMAN	EMILIN-2 (Elastin microfibril interface-located protein 2) (Elastin microfibril interfacer 2) (Protein FOAP-10)	EMILIN2
EMP3_HUMAN	Epithelial membrane protein 3 (EMP-3) (Hematopoietic neural membrane protein 1) (HNMP-1) (Protein YMP)	EMP3 YMP
EMR2_HUMAN	EGF-like module-containing mucin-like hormone receptor-like 2 (EGF-like module receptor 2) (CD antigen CD312)	EMR2
ENPL_HUMAN	Endoplasmin (94 kDa glucose-regulated protein) (GRP-94) (Heat shock protein 90 kDa beta member 1) (Tumor rejection antigen 1) (gp96 homolog)	HSP90B1 GRP94 TRA1
ENPP1_HUMAN	Ectonucleotide pyrophosphatase/phosphodiesterase family member 1 (E-NPP 1) (Membrane component chromosome 6 surface marker 1) (Phosphodiesterase I/nucleotide pyrophosphatase 1) (Plasma-cell membrane glycoprotein PC-1) [Includes: Alkaline phosphodiesterase I (EC 3.1.4.1); Nucleotide pyrophosphatase (NPPase) (EC 3.6.1.9)]	ENPP1 M6S1 NPPS PC1 PDNP1
ENPP2_HUMAN	Ectonucleotide pyrophosphatase/phosphodiesterase family member 2 (E-NPP 2) (EC 3.1.4.39) (Autotaxin) (Extracellular lysophospholipase D) (LysoPLD)	ENPP2 ATX PDNP2
ENPP5_HUMAN	Ectonucleotide pyrophosphatase/phosphodiesterase family member 5 (E-NPP 5) (NPP-5) (EC 3.1.-.-)	ENPP5 UNQ550/PRO1107
ENTP1_HUMAN	Ectonucleoside triphosphate diphosphohydrolase 1 (NTPDase 1) (EC 3.6.1.5) (Ecto-ATP diphosphohydrolase 1) (Ecto-ATPDase 1) (Ecto-ATPase 1) (Ecto-apyrase) (Lymphoid cell activation antigen) (CD antigen CD39)	ENTPD1 CD39
ENTP3_HUMAN	Ectonucleoside triphosphate diphosphohydrolase 3 (NTPDase 3) (EC 3.6.1.5) (CD39 antigen-like 3) (Ecto-ATP diphosphohydrolase 3) (Ecto-ATPDase 3) (Ecto-ATPase 3) (Ecto-apyrase 3) (HB6)	ENTPD3 CD39L3
ENTP5_HUMAN	Ectonucleoside triphosphate diphosphohydrolase 5 (NTPDase 5) (EC 3.6.1.6) (CD39 antigen-like 4) (ER-UDPase) (Guanosine-diphosphatase ENTPD5) (GDPase ENTPD5) (EC 3.6.1.42) (Nucleoside diphosphatase) (Uridine-diphosphatase ENTPD5) (UDPase ENTPD5)	ENTPD5 CD39L4 PCPH
EPHB3_HUMAN	Ephrin type-B receptor 3 (EC 2.7.10.1) (EPH-like tyrosine kinase 2) (EPH-like kinase 2) (Embryonic kinase 2) (EK2) (hEK2) (Tyrosine-protein kinase TYRO6)	EPHB3 ETK2 HEK2 TYRO6
ERAP2_HUMAN	Endoplasmic reticulum aminopeptidase 2 (EC 3.4.11.-) (Leukocyte-derived arginine aminopeptidase) (L-RAP)	ERAP2 LRAP
ERBB2_HUMAN	Receptor tyrosine-protein kinase erbB-2 (EC 2.7.10.1) (Metastatic lymph node gene 19 protein) (MLN 19) (Proto-oncogene Neu) (Proto-oncogene c-ErbB-2) (Tyrosine kinase-type cell surface receptor HER2) (p185erbB2) (CD antigen CD340)	ERBB2 HER2 MLN19 NEU NGL
ERBB3_HUMAN	Receptor tyrosine-protein kinase erbB-3 (EC 2.7.10.1) (Proto-oncogene-like protein c-ErbB-3) (Tyrosine kinase-type cell surface receptor HER3)	ERBB3 HER3
ERBB4_HUMAN	Receptor tyrosine-protein kinase erbB-4 (EC 2.7.10.1) (Proto-oncogene-like protein c-ErbB-4) (Tyrosine kinase-type cell surface receptor HER4) (p180erbB4) [Cleaved into: ERBB4 intracellular domain (4ICD) (E4ICD) (s80HER4)]	ERBB4 HER4
ERGI2_HUMAN	Endoplasmic reticulum-Golgi intermediate compartment protein 2	ERGIC2 ERV41 PTX1 CDA14
ERMP1_HUMAN	Endoplasmic reticulum metallopeptidase 1 (EC 3.4.-.-) (Felix-ina)	ERMP1 FXNA KIAA1815
ERO1A_HUMAN	ERO1-like protein alpha (ERO1-L) (ERO1-L-alpha) (EC 1.8.4.-) (Endoplasmic oxidoreductin-1-like protein) (Oxidoreductin-1-L-alpha)	ERO1L UNQ434/PRO865
ERO1B_HUMAN	ERO1-like protein beta (ERO1-L-beta) (EC 1.8.4.-) (Endoplasmic oxidoreductin-1-like protein B) (Oxidoreductin-1-L-beta)	ERO1LB
ESAM_HUMAN	Endothelial cell-selective adhesion molecule	ESAM UNQ220/PRO246
F13B_HUMAN	Coagulation factor XIII B chain (Fibrin-stabilizing factor B subunit) (Protein-glutamine gamma-glutamyltransferase B chain) (Transglutaminase B chain)	F13B
F174A_HUMAN	Membrane protein FAM174A (Hepatitis C virus NS5A-transactivated protein 6) (HCV NS5A-transactivated protein 6) (Transmembrane protein 157)	FAM174A NS5ATP6 TMEM157 UNQ1912/PRO4371
FA11_HUMAN	Coagulation factor XI (FXI) (EC 3.4.21.27) (Plasma thromboplastin antecedent) (PTA) [Cleaved into: Coagulation factor XIa heavy chain; Coagulation factor XIa light chain]	F11
FA20A_HUMAN	Protein FAM20A	FAM20A UNQ9388/PRO34279
FA5_HUMAN	Coagulation factor V (Activated protein C cofactor) (Proaccelerin, labile factor) [Cleaved into: Coagulation factor V heavy chain; Coagulation factor V light chain]	F5
FA7_HUMAN	Coagulation factor VII (EC 3.4.21.21) (Proconvertin) (Serum prothrombin conversion accelerator) (SPCA) (Eptacog alfa) [Cleaved into: Factor VII light chain; Factor VII heavy chain]	F7
FAM3D_HUMAN	Protein FAM3D	FAM3D UNQ567/PRO1130
FAT1_HUMAN	Protocadherin Fat 1 (Cadherin family member 7) (Cadherin-related tumor suppressor homolog) (Protein fat homolog) [Cleaved into: Protocadherin Fat 1, nuclear form]	FAT1 CDHF7 FAT
FAT2_HUMAN	Protocadherin Fat 2 (hFat2) (Cadherin family member 8) (Multiple epidermal growth factor-like domains protein 1) (Multiple EGF-like domains protein 1)	FAT2 CDHF8 KIAA0811 MEGF1
FBLN1_HUMAN	Fibulin-1 (FIBL-1)	FBLN1 PP213
FBLN2_HUMAN	Fibulin-2 (FIBL-2)	FBLN2
FBLN5_HUMAN	Fibulin-5 (FIBL-5) (Developmental arteries and neural crest EGF-like protein) (Dance) (Urine p50 protein) (UP50)	FBLN5 DANCE UNQ184/PRO210
FBLN7_HUMAN	Fibulin-7 (FIBL-7)	FBLN7 TM14
FBN1_HUMAN	Fibrillin-1	FBN1 FBN
FCAR_HUMAN	Immunoglobulin alpha Fc receptor (IgA Fc receptor) (CD antigen CD89)	FCAR CD89
FCGBP_HUMAN	IgGFc-binding protein (Fcgamma-binding protein antigen) (FcgammaBP)	FCGBP
FCGRN_HUMAN	IgG receptor FcRn large subunit p51 (FcRn) (IgG Fc fragment receptor transporter alpha chain) (Neonatal Fc receptor)	FCGRT FCRN
FETUA_HUMAN	Alpha-2-HS-glycoprotein (Alpha-2-Z-globulin) (Ba-alpha-2-glycoprotein) (Fetuin-A) [Cleaved into: Alpha-2-HS-glycoprotein chain A; Alpha-2-HS-glycoprotein chain B]	AHSG FETUA PRO2743
FETUB_HUMAN	Fetuin-B (16G2) (Fetuin-like protein IRL685) (Gugu)	FETUB
FGFR1_HUMAN	Fibroblast growth factor receptor 1 (FGFR-1) (EC 2.7.10.1) (Basic fibroblast growth factor receptor 1) (BFGFR) (bFGF-R-1) (Fms-like tyrosine kinase 2) (FLT-2) (N-sam) (Proto-oncogene c-Fgr) (CD antigen CD331)	FGFR1 BFGFR CEK FGFBR FLG FLT2 HBGFR
FGFR2_HUMAN	Fibroblast growth factor receptor 2 (FGFR-2) (EC 2.7.10.1) (K-sam) (KGFR) (Keratinocyte growth factor receptor) (CD antigen CD332)	FGFR2 BEK KGFR KSAM
FGL2_HUMAN	Fibroleukin (Fibrinogen-like protein 2) (pT49)	FGL2
FHR3_HUMAN	Complement factor H-related protein 3 (FHR-3) (DOWN16) (H factor-like protein 3)	CFHR3 CFHL3 FHR3
FHR4_HUMAN	Complement factor H-related protein 4 (FHR-4)	CFHR4 CFHL4 FHR4
FIBA_HUMAN	Fibrinogen alpha chain [Cleaved into: Fibrinopeptide A; Fibrinogen alpha chain]	FGA
FIBB_HUMAN	Fibrinogen beta chain [Cleaved into: Fibrinopeptide B; Fibrinogen beta chain]	FGB
FIBG_HUMAN	Fibrinogen gamma chain	FGG PRO2061
FINC_HUMAN	Fibronectin (FN) (Cold-insoluble globulin) (CIG) [Cleaved into: Anastellin; Ugl-Y1; Ugl-Y2; Ugl-Y3]	FN1 FN
FKB10_HUMAN	Peptidyl-prolyl cis-trans isomerase FKBP10 (PPIase FKBP10) (EC 5.2.1.8) (65 kDa FK506-binding protein) (65 kDa FKBP) (FKBP-65) (FK506-binding protein 10) (FKBP-10) (Immunophilin FKBP65) (Rotamase)	FKBP10 FKBP65 PSEC0056
FKBP9_HUMAN	Peptidyl-prolyl cis-trans isomerase FKBP9 (PPIase FKBP9) (EC 5.2.1.8) (63 kDa FK506-binding protein) (63 kDa FKBP) (FKBP-63) (FK506-binding protein 9) (FKBP-9) (Rotamase)	FKBP9 FKBP60 FKBP63
FMOD_HUMAN	Fibromodulin (FM) (Collagen-binding 59 kDa protein) (Keratan sulfate proteoglycan fibromodulin) (KSPG fibromodulin)	FMOD FM SLRR2E
FNDC1_HUMAN	Fibronectin type III domain-containing protein 1 (Activation-associated cDNA protein) (Expressed in synovial lining protein)	FNDC1 FNDC2 KIAA1866 MEL4B3
FOLH1_HUMAN	Glutamate carboxypeptidase 2 (EC 3.4.17.21) (Cell growth-inhibiting gene 27 protein) (Folate hydrolase 1) (Folylpoly-gamma-glutamate carboxypeptidase) (FGCP) (Glutamate carboxypeptidase II) (GCPII) (Membrane glutamate carboxypeptidase) (mGCP) (N-acetylated-alpha-linked acidic dipeptidase I) (NAALADase I) (Prostate-specific membrane antigen) (PSM) (PSMA) (Pteroylpoly-gamma-glutamate carboxypeptida…	FOLH1 FOLH NAALAD1 PSM PSMA GIG27
FOLR1_HUMAN	Folate receptor alpha (FR-alpha) (Adult folate-binding protein) (FBP) (Folate receptor 1) (Folate receptor, adult) (KB cells FBP) (Ovarian tumor-associated antigen MOv18)	FOLR1 FOLR
FOLR2_HUMAN	Folate receptor beta (FR-beta) (Folate receptor 2) (Folate receptor, fetal/placental) (Placental folate-binding protein) (FBP)	FOLR2
FPRP_HUMAN	Prostaglandin F2 receptor negative regulator (CD9 partner 1) (CD9P-1) (Glu-Trp-Ile EWI motif-containing protein F) (EWI-F) (Prostaglandin F2-alpha receptor regulatory protein) (Prostaglandin F2-alpha receptor-associated protein) (CD antigen CD315)	PTGFRN CD9P1 EWIF FPRP KIAA1436
FST_HUMAN	Follistatin (FS) (Activin-binding protein)	FST
FSTL1_HUMAN	Follistatin-related protein 1 (Follistatin-like protein 1)	FSTL1 FRP
FUCO_HUMAN	Tissue alpha-L-fucosidase (EC 3.2.1.51) (Alpha-L-fucosidase I) (Alpha-L-fucoside fucohydrolase 1) (Alpha-L-fucosidase 1)	FUCA1 Nbla10230
FUT11_HUMAN	Alpha-(1,3)-fucosyltransferase 11 (EC 2.4.1.-) (Fucosyltransferase XI) (Fuc-TXI) (FucT-XI) (Galactoside 3-L-fucosyltransferase 11) (Fucosyltransferase 11)	FUT11
FZD4_HUMAN	Frizzled-4 (Fz-4) (hFz4) (FzE4) (CD antigen CD344)	FZD4
G3ST2_HUMAN	Galactose-3-O-sulfotransferase 2 (Gal3ST-2) (EC 2.8.2.-) (Beta-galactose-3-O-sulfotransferase 2) (Gal-beta-1, 3-GalNAc 3'-sulfotransferase 2) (Glycoprotein beta-Gal 3'-sulfotransferase 2)	GAL3ST2 GP3ST
GALT1_HUMAN	Polypeptide N-acetylgalactosaminyltransferase 1 (EC 2.4.1.41) (Polypeptide GalNAc transferase 1) (GalNAc-T1) (pp-GaNTase 1) (Protein-UDP acetylgalactosaminyltransferase 1) (UDP-GalNAc:polypeptide N-acetylgalactosaminyltransferase 1) [Cleaved into: Polypeptide N-acetylgalactosaminyltransferase 1 soluble form]	GALNT1
GBRP_HUMAN	Gamma-aminobutyric acid receptor subunit pi (GABA(A) receptor subunit pi)	GABRP
GCNT1_HUMAN	Beta-1,3-galactosyl-O-glycosyl-glycoprotein beta-1,6-N-acetylglucosaminyltransferase (EC 2.4.1.102) (Core 2-branching enzyme) (Core2-GlcNAc-transferase) (C2GNT) (Core 2 GNT)	GCNT1 NACGT2
GDE1_HUMAN	Glycerophosphodiester phosphodiesterase 1 (EC 3.1.4.44) (Membrane-interacting protein of RGS16) (RGS16-interacting membrane protein)	GDE1 MIR16
GDPD5_HUMAN	Glycerophosphodiester phosphodiesterase domain-containing protein 5 (EC 3.1.-.-) (Glycerophosphodiester phosphodiesterase 2)	GDPD5 GDE2 PP6037 PP9363 UNQ1850/PRO3580
GFRA1_HUMAN	GDNF family receptor alpha-1 (GDNF receptor alpha-1) (GDNFR-alpha-1) (GFR-alpha-1) (RET ligand 1) (TGF-beta-related neurotrophic factor receptor 1)	GFRA1 GDNFRA RETL1 TRNR1
GGT1_HUMAN	Gamma-glutamyltranspeptidase 1 (GGT 1) (EC 2.3.2.2) (Gamma-glutamyltransferase 1) (Glutathione hydrolase 1) (EC 3.4.19.13) (Leukotriene-C4 hydrolase) (EC 3.4.19.14) (CD antigen CD224) [Cleaved into: Gamma-glutamyltranspeptidase 1 heavy chain; Gamma-glutamyltranspeptidase 1 light chain]	GGT1 GGT
GI24_HUMAN	Platelet receptor Gi24	C10orf54 PP2135 UNQ730/PRO1412
GLB1L_HUMAN	Beta-galactosidase-1-like protein (EC 3.2.1.-)	GLB1L UNQ229/PRO262
GLCM_HUMAN	Glucosylceramidase (EC 3.2.1.45) (Acid beta-glucosidase) (Alglucerase) (Beta-glucocerebrosidase) (D-glucosyl-N-acylsphingosine glucohydrolase) (Imiglucerase)	GBA GC GLUC
GLT10_HUMAN	Polypeptide N-acetylgalactosaminyltransferase 10 (EC 2.4.1.41) (Polypeptide GalNAc transferase 10) (GalNAc-T10) (pp-GaNTase 10) (Protein-UDP acetylgalactosaminyltransferase 10) (UDP-GalNAc:polypeptide N-acetylgalactosaminyltransferase 10)	GALNT10
GLU2B_HUMAN	Glucosidase 2 subunit beta (80K-H protein) (Glucosidase II subunit beta) (Protein kinase C substrate 60.1 kDa protein heavy chain) (PKCSH)	PRKCSH G19P1
GNPTA_HUMAN	N-acetylglucosamine-1-phosphotransferase subunits alpha/beta (EC 2.7.8.17) (GlcNAc-1-phosphotransferase subunits alpha/beta) (Stealth protein GNPTAB) (UDP-N-acetylglucosamine-1-phosphotransferase subunits alpha/beta) [Cleaved into: N-acetylglucosamine-1-phosphotransferase subunit alpha; N-acetylglucosamine-1-phosphotransferase subunit beta]	GNPTAB GNPTA KIAA1208
GNS_HUMAN	N-acetylglucosamine-6-sulfatase (EC 3.1.6.14) (Glucosamine-6-sulfatase) (G6S)	GNS
GNT2A_HUMAN	N-acetyllactosaminide beta-1,6-N-acetylglucosaminyl-transferase, isoform A (N-acetylglucosaminyltransferase) (EC 2.4.1.150) (I-branching enzyme) (IGNT)	GCNT2 GCNT5 II NACGT1
GOLI4_HUMAN	Golgi integral membrane protein 4 (Golgi integral membrane protein, cis) (GIMPc) (Golgi phosphoprotein 4) (Golgi-localized phosphoprotein of 130 kDa) (Golgi phosphoprotein of 130 kDa)	GOLIM4 GIMPC GOLPH4 GPP130
GOLM1_HUMAN	Golgi membrane protein 1 (Golgi membrane protein GP73) (Golgi phosphoprotein 2)	GOLM1 C9orf155 GOLPH2 PSEC0242 UNQ686/PRO1326
GP107_HUMAN	Protein GPR107 (Lung seven transmembrane receptor 1)	GPR107 KIAA1624 LUSTR1
GP116_HUMAN	Probable G-protein coupled receptor 116	GPR116 KIAA0758
GP124_HUMAN	G-protein coupled receptor 124 (Tumor endothelial marker 5)	GPR124 KIAA1531 TEM5
GP126_HUMAN	G-protein coupled receptor 126 (Developmentally regulated G-protein-coupled receptor) (Vascular inducible G protein-coupled receptor)	GPR126 DREG VIGR
GP2_HUMAN	Pancreatic secretory granule membrane major glycoprotein GP2 (Pancreatic zymogen granule membrane protein GP-2) (ZAP75)	GP2
GPC1_HUMAN	Glypican-1 [Cleaved into: Secreted glypican-1]	GPC1
GPNMB_HUMAN	Transmembrane glycoprotein NMB (Transmembrane glycoprotein HGFIN)	GPNMB HGFIN NMB UNQ1725/PRO9925
GPR56_HUMAN	G-protein coupled receptor 56 (Protein TM7XN1) [Cleaved into: GPR56 N-terminal fragment (GPR56 NT) (GPR56(N)) (GPR56 extracellular subunit) (GPR56 subunit alpha); GPR56 C-terminal fragment (GPR56 CT) (GPR56(C)) (GPR56 seven-transmembrane subunit) (GPR56 7TM) (GPR56 subunit beta)]	GPR56 TM7LN4 TM7XN1 UNQ540/PRO1083
GRAH_HUMAN	Granzyme H (EC 3.4.21.-) (CCP-X) (Cathepsin G-like 2) (CTSGL2) (Cytotoxic T-lymphocyte proteinase) (Cytotoxic serine protease C) (CSP-C)	GZMH CGL2 CTSGL2
GRN_HUMAN	Granulins (Proepithelin) (PEPI) [Cleaved into: Acrogranin; Paragranulin; Granulin-1 (Granulin G); Granulin-2 (Granulin F); Granulin-3 (Granulin B); Granulin-4 (Granulin A); Granulin-5 (Granulin C); Granulin-6 (Granulin D); Granulin-7 (Granulin E)]	GRN
GSLG1_HUMAN	Golgi apparatus protein 1 (CFR-1) (Cysteine-rich fibroblast growth factor receptor) (E-selectin ligand 1) (ESL-1) (Golgi sialoglycoprotein MG-160)	GLG1 CFR1 ESL1 MG160
GT251_HUMAN	Procollagen galactosyltransferase 1 (EC 2.4.1.50) (Collagen beta(1-O)galactosyltransferase 1) (Glycosyltransferase 25 family member 1) (Hydroxylysine galactosyltransferase 1)	COLGALT1 GLT25D1 PSEC0241
GT253_HUMAN	Probable inactive glycosyltransferase 25 family member 3 (Cerebral endothelial cell adhesion molecule)	CERCAM CEECAM1 GLT25D3 KIAA1502
GTR1_HUMAN	Solute carrier family 2, facilitated glucose transporter member 1 (Glucose transporter type 1, erythrocyte/brain) (GLUT-1) (HepG2 glucose transporter)	SLC2A1 GLUT1
GXLT2_HUMAN	Glucoside xylosyltransferase 2 (EC 2.4.2.n2) (Glycosyltransferase 8 domain-containing protein 4)	GXYLT2 GLT8D4
HEMO_HUMAN	Hemopexin (Beta-1B-glycoprotein)	HPX
HEPH_HUMAN	Hephaestin (EC 1.-.-.-)	HEPH KIAA0698 UNQ2562/PRO6242
HEXB_HUMAN	Beta-hexosaminidase subunit beta (EC 3.2.1.52) (Beta-N-acetylhexosaminidase subunit beta) (Hexosaminidase subunit B) (Cervical cancer proto-oncogene 7 protein) (HCC-7) (N-acetyl-beta-glucosaminidase subunit beta) [Cleaved into: Beta-hexosaminidase subunit beta chain B; Beta-hexosaminidase subunit beta chain A]	HEXB HCC7
HFE_HUMAN	Hereditary hemochromatosis protein (HLA-H)	HFE HLAH
HG2A_HUMAN	HLA class II histocompatibility antigen gamma chain (HLA-DR antigens-associated invariant chain) (Ia antigen-associated invariant chain) (Ii) (p33) (CD antigen CD74)	CD74 DHLAG
HGFL_HUMAN	Hepatocyte growth factor-like protein (Macrophage stimulatory protein) (Macrophage-stimulating protein) (MSP) [Cleaved into: Hepatocyte growth factor-like protein alpha chain; Hepatocyte growth factor-like protein beta chain]	MST1 D3F15S2 DNF15S2 HGFL
HGNAT_HUMAN	Heparan-alpha-glucosaminide N-acetyltransferase (EC 2.3.1.78) (Transmembrane protein 76)	HGSNAT TMEM76
HLAF_HUMAN	HLA class I histocompatibility antigen, alpha chain F (CDA12) (HLA F antigen) (Leukocyte antigen F) (MHC class I antigen F)	HLA-F HLA-5.4 HLAF
HMCN1_HUMAN	Hemicentin-1 (Fibulin-6) (FIBL-6)	HMCN1 FIBL6
HPT_HUMAN	Haptoglobin (Zonulin) [Cleaved into: Haptoglobin alpha chain; Haptoglobin beta chain]	HP
HRG_HUMAN	Histidine-rich glycoprotein (Histidine-proline-rich glycoprotein) (HPRG)	HRG
HS2ST_HUMAN	Heparan sulfate 2-O-sulfotransferase 1 (2-O-sulfotransferase) (2OST) (EC 2.8.2.-)	HS2ST1 HS2ST KIAA0448
HYOU1_HUMAN	Hypoxia up-regulated protein 1 (150 kDa oxygen-regulated protein) (ORP-150) (170 kDa glucose-regulated protein) (GRP-170)	HYOU1 GRP170 ORP150
I13R1_HUMAN	Interleukin-13 receptor subunit alpha-1 (IL-13 receptor subunit alpha-1) (IL-13R subunit alpha-1) (IL-13R-alpha-1) (IL-13RA1) (Cancer/testis antigen 19) (CT19) (CD antigen CD213a1)	IL13RA1 IL13R IL13RA
I17RA_HUMAN	Interleukin-17 receptor A (IL-17 receptor A) (IL-17RA) (CDw217) (CD antigen CD217)	IL17RA IL17R
IBP3_HUMAN	Insulin-like growth factor-binding protein 3 (IBP-3) (IGF-binding protein 3) (IGFBP-3)	IGFBP3 IBP3
IC1_HUMAN	Plasma protease C1 inhibitor (C1 Inh) (C1Inh) (C1 esterase inhibitor) (C1-inhibiting factor) (Serpin G1)	SERPING1 C1IN C1NH
ICAM1_HUMAN	Intercellular adhesion molecule 1 (ICAM-1) (Major group rhinovirus receptor) (CD antigen CD54)	ICAM1
ICAM2_HUMAN	Intercellular adhesion molecule 2 (ICAM-2) (CD antigen CD102)	ICAM2
ICAM3_HUMAN	Intercellular adhesion molecule 3 (ICAM-3) (CDw50) (ICAM-R) (CD antigen CD50)	ICAM3
IDD_HUMAN	Integral membrane protein DGCR2/IDD	DGCR2 IDD KIAA0163
IGF1R_HUMAN	Insulin-like growth factor 1 receptor (EC 2.7.10.1) (Insulin-like growth factor I receptor) (IGF-I receptor) (CD antigen CD221) [Cleaved into: Insulin-like growth factor 1 receptor alpha chain; Insulin-like growth factor 1 receptor beta chain]	IGF1R
IGHA1_HUMAN	Ig alpha-1 chain C region	IGHA1
IGHA2_HUMAN	Ig alpha-2 chain C region	IGHA2
IGHG1_HUMAN	Ig gamma-1 chain C region	IGHG1
IGHG2_HUMAN	Ig gamma-2 chain C region	IGHG2
IGHG3_HUMAN	Ig gamma-3 chain C region (HDC) (Heavy chain disease protein)	IGHG3
IGHG4_HUMAN	Ig gamma-4 chain C region	IGHG4
IGHM_HUMAN	Ig mu chain C region	IGHM
IGJ_HUMAN	Immunoglobulin J chain	IGJ IGCJ
IGS21_HUMAN	Immunoglobulin superfamily member 21 (IgSF21)	IGSF21
IGSF1_HUMAN	Immunoglobulin superfamily member 1 (IgSF1) (Immunoglobulin-like domain-containing protein 1) (Inhibin-binding protein) (InhBP) (Pituitary gland-specific factor 2) (p120)	IGSF1 IGDC1 KIAA0364 PGSF2
IGSF3_HUMAN	Immunoglobulin superfamily member 3 (IgSF3) (Glu-Trp-Ile EWI motif-containing protein 3) (EWI-3)	IGSF3 EWI3 KIAA0466
IGSF8_HUMAN	Immunoglobulin superfamily member 8 (IgSF8) (CD81 partner 3) (Glu-Trp-Ile EWI motif-containing protein 2) (EWI-2) (Keratinocytes-associated transmembrane protein 4) (KCT-4) (LIR-D1) (Prostaglandin regulatory-like protein) (PGRL) (CD antigen CD316)	IGSF8 CD81P3 EWI2 KCT4
IKIP_HUMAN	Inhibitor of nuclear factor kappa-B kinase-interacting protein (I kappa-B kinase-interacting protein) (IKBKB-interacting protein) (IKK-interacting protein)	IKBIP IKIP
IL2RG_HUMAN	Cytokine receptor common subunit gamma (Interleukin-2 receptor subunit gamma) (IL-2 receptor subunit gamma) (IL-2R subunit gamma) (IL-2RG) (gammaC) (p64) (CD antigen CD132)	IL2RG
IL6RB_HUMAN	Interleukin-6 receptor subunit beta (IL-6 receptor subunit beta) (IL-6R subunit beta) (IL-6R-beta) (IL-6RB) (CDw130) (Interleukin-6 signal transducer) (Membrane glycoprotein 130) (gp130) (Oncostatin-M receptor subunit alpha) (CD antigen CD130)	IL6ST
INAR1_HUMAN	Interferon alpha/beta receptor 1 (IFN-R-1) (IFN-alpha/beta receptor 1) (Cytokine receptor class-II member 1) (Cytokine receptor family 2 member 1) (CRF2-1) (Type I interferon receptor 1)	IFNAR1 IFNAR
INSR_HUMAN	Insulin receptor (IR) (EC 2.7.10.1) (CD antigen CD220) [Cleaved into: Insulin receptor subunit alpha; Insulin receptor subunit beta]	INSR
IPSP_HUMAN	Plasma serine protease inhibitor (Acrosomal serine protease inhibitor) (Plasminogen activator inhibitor 3) (PAI-3) (PAI3) (Protein C inhibitor) (PCI) (Serpin A5)	SERPINA5 PCI PLANH3 PROCI
ISK8_HUMAN	Serine protease inhibitor Kazal-type 8	SPINK8
ISLR_HUMAN	Immunoglobulin superfamily containing leucine-rich repeat protein	ISLR UNQ189/PRO215
ITA1_HUMAN	Integrin alpha-1 (CD49 antigen-like family member A) (Laminin and collagen receptor) (VLA-1) (CD antigen CD49a)	ITGA1
ITA11_HUMAN	Integrin alpha-11	ITGA11 MSTP018
ITA2_HUMAN	Integrin alpha-2 (CD49 antigen-like family member B) (Collagen receptor) (Platelet membrane glycoprotein Ia) (GPIa) (VLA-2 subunit alpha) (CD antigen CD49b)	ITGA2 CD49B
ITA3_HUMAN	Integrin alpha-3 (CD49 antigen-like family member C) (FRP-2) (Galactoprotein B3) (GAPB3) (VLA-3 subunit alpha) (CD antigen CD49c) [Cleaved into: Integrin alpha-3 heavy chain; Integrin alpha-3 light chain]	ITGA3 MSK18
ITA5_HUMAN	Integrin alpha-5 (CD49 antigen-like family member E) (Fibronectin receptor subunit alpha) (Integrin alpha-F) (VLA-5) (CD antigen CD49e) [Cleaved into: Integrin alpha-5 heavy chain; Integrin alpha-5 light chain]	ITGA5 FNRA
ITA6_HUMAN	Integrin alpha-6 (CD49 antigen-like family member F) (VLA-6) (CD antigen CD49f) [Cleaved into: Integrin alpha-6 heavy chain; Integrin alpha-6 light chain]	ITGA6
ITA7_HUMAN	Integrin alpha-7 [Cleaved into: Integrin alpha-7 heavy chain; Integrin alpha-7 light chain; Integrin alpha-7 70 kDa form]	ITGA7 UNQ406/PRO768
ITA8_HUMAN	Integrin alpha-8 [Cleaved into: Integrin alpha-8 heavy chain; Integrin alpha-8 light chain]	ITGA8
ITA9_HUMAN	Integrin alpha-9 (Integrin alpha-RLC)	ITGA9
ITAE_HUMAN	Integrin alpha-E (HML-1 antigen) (Integrin alpha-IEL) (Mucosal lymphocyte 1 antigen) (CD antigen CD103) [Cleaved into: Integrin alpha-E light chain; Integrin alpha-E heavy chain]	ITGAE
ITAL_HUMAN	Integrin alpha-L (CD11 antigen-like family member A) (Leukocyte adhesion glycoprotein LFA-1 alpha chain) (LFA-1A) (Leukocyte function-associated molecule 1 alpha chain) (CD antigen CD11a)	ITGAL CD11A
ITAM_HUMAN	Integrin alpha-M (CD11 antigen-like family member B) (CR-3 alpha chain) (Cell surface glycoprotein MAC-1 subunit alpha) (Leukocyte adhesion receptor MO1) (Neutrophil adherence receptor) (CD antigen CD11b)	ITGAM CD11B CR3A
ITAV_HUMAN	Integrin alpha-V (Vitronectin receptor subunit alpha) (CD antigen CD51) [Cleaved into: Integrin alpha-V heavy chain; Integrin alpha-V light chain]	ITGAV MSK8 VNRA
ITAX_HUMAN	Integrin alpha-X (CD11 antigen-like family member C) (Leu M5) (Leukocyte adhesion glycoprotein p150,95 alpha chain) (Leukocyte adhesion receptor p150,95) (CD antigen CD11c)	ITGAX CD11C
ITB1_HUMAN	Integrin beta-1 (Fibronectin receptor subunit beta) (Glycoprotein IIa) (GPIIA) (VLA-4 subunit beta) (CD antigen CD29)	ITGB1 FNRB MDF2 MSK12
ITB2_HUMAN	Integrin beta-2 (Cell surface adhesion glycoproteins LFA-1/CR3/p150,95 subunit beta) (Complement receptor C3 subunit beta) (CD antigen CD18)	ITGB2 CD18 MFI7
ITB4_HUMAN	Integrin beta-4 (GP150) (CD antigen CD104)	ITGB4
ITB5_HUMAN	Integrin beta-5	ITGB5
ITB7_HUMAN	Integrin beta-7 (Gut homing receptor beta subunit)	ITGB7
ITB8_HUMAN	Integrin beta-8	ITGB8
ITFG3_HUMAN	Protein ITFG3	ITFG3 C16orf9
ITIH1_HUMAN	Inter-alpha-trypsin inhibitor heavy chain H1 (ITI heavy chain H1) (ITI-HC1) (Inter-alpha-inhibitor heavy chain 1) (Inter-alpha-trypsin inhibitor complex component III) (Serum-derived hyaluronan-associated protein) (SHAP)	ITIH1 IGHEP1
ITIH2_HUMAN	Inter-alpha-trypsin inhibitor heavy chain H2 (ITI heavy chain H2) (ITI-HC2) (Inter-alpha-inhibitor heavy chain 2) (Inter-alpha-trypsin inhibitor complex component II) (Serum-derived hyaluronan-associated protein) (SHAP)	ITIH2 IGHEP2
ITIH4_HUMAN	Inter-alpha-trypsin inhibitor heavy chain H4 (ITI heavy chain H4) (ITI-HC4) (Inter-alpha-inhibitor heavy chain 4) (Inter-alpha-trypsin inhibitor family heavy chain-related protein) (IHRP) (Plasma kallikrein sensitive glycoprotein 120) (Gp120) (PK-120) [Cleaved into: 70 kDa inter-alpha-trypsin inhibitor heavy chain H4; 35 kDa inter-alpha-trypsin inhibitor heavy chain H4]	ITIH4 IHRP ITIHL1 PK120 PRO1851
ITPR1_HUMAN	Inositol 1,4,5-trisphosphate receptor type 1 (IP3 receptor isoform 1) (IP3R 1) (InsP3R1) (Type 1 inositol 1,4,5-trisphosphate receptor) (Type 1 InsP3 receptor)	ITPR1 INSP3R1
JAM1_HUMAN	Junctional adhesion molecule A (JAM-A) (Junctional adhesion molecule 1) (JAM-1) (Platelet F11 receptor) (Platelet adhesion molecule 1) (PAM-1) (CD antigen CD321)	F11R JAM1 JCAM UNQ264/PRO301
JAM2_HUMAN	Junctional adhesion molecule B (JAM-B) (Junctional adhesion molecule 2) (JAM-2) (Vascular endothelial junction-associated molecule) (VE-JAM) (CD antigen CD322)	JAM2 C21orf43 VEJAM UNQ219/PRO245
K0947_HUMAN	Uncharacterized protein KIAA0947	KIAA0947
K1324_HUMAN	UPF0577 protein KIAA1324 (Estrogen-induced gene 121 protein)	KIAA1324 EIG121 UNQ2426/PRO4985
K1467_HUMAN	Uncharacterized protein KIAA1467	KIAA1467
K319L_HUMAN	Dyslexia-associated protein KIAA0319-like protein	KIAA0319L KIAA1837 PP791
KAIN_HUMAN	Kallistatin (Kallikrein inhibitor) (Peptidase inhibitor 4) (PI-4) (Serpin A4)	SERPINA4 KST PI4
KCMB1_HUMAN	Calcium-activated potassium channel subunit beta-1 (BK channel subunit beta-1) (BKbeta) (BKbeta1) (Hbeta1) (Calcium-activated potassium channel, subfamily M subunit beta-1) (Calcium-activated potassium channel subunit beta) (Charybdotoxin receptor subunit beta-1) (K(VCA)beta-1) (Maxi K channel subunit beta-1) (Slo-beta-1) (Slo-beta)	KCNMB1
KCNE4_HUMAN	Potassium voltage-gated channel subfamily E member 4 (MinK-related peptide 3) (Minimum potassium ion channel-related peptide 3) (Potassium channel subunit beta MiRP3)	KCNE4
KDEL2_HUMAN	KDEL motif-containing protein 2	KDELC2 UNQ1904/PRO4350
KERA_HUMAN	Keratocan (KTN) (Keratan sulfate proteoglycan keratocan)	KERA SLRR2B
KIRR1_HUMAN	Kin of IRRE-like protein 1 (Kin of irregular chiasm-like protein 1) (Nephrin-like protein 1)	KIRREL KIRREL1 NEPH1
KLK12_HUMAN	Kallikrein-12 (EC 3.4.21.-) (Kallikrein-like protein 5) (KLK-L5)	KLK12 KLKL5 UNQ669/PRO1303
KLK13_HUMAN	Kallikrein-13 (EC 3.4.21.-) (Kallikrein-like protein 4) (KLK-L4)	KLK13 KLKL4
KLK6_HUMAN	Kallikrein-6 (EC 3.4.21.-) (Neurosin) (Protease M) (SP59) (Serine protease 18) (Serine protease 9) (Zyme)	KLK6 PRSS18 PRSS9
KLKB1_HUMAN	Plasma kallikrein (EC 3.4.21.34) (Fletcher factor) (Kininogenin) (Plasma prekallikrein) [Cleaved into: Plasma kallikrein heavy chain; Plasma kallikrein light chain]	KLKB1 KLK3
KNG1_HUMAN	Kininogen-1 (Alpha-2-thiol proteinase inhibitor) (Fitzgerald factor) (High molecular weight kininogen) (HMWK) (Williams-Fitzgerald-Flaujeac factor) [Cleaved into: Kininogen-1 heavy chain; T-kinin (Ile-Ser-Bradykinin); Bradykinin (Kallidin I); Lysyl-bradykinin (Kallidin II); Kininogen-1 light chain; Low molecular weight growth-promoting factor]	KNG1 BDK KNG
L1CAM_HUMAN	Neural cell adhesion molecule L1 (N-CAM-L1) (NCAM-L1) (CD antigen CD171)	L1CAM CAML1 MIC5
LAIR1_HUMAN	Leukocyte-associated immunoglobulin-like receptor 1 (LAIR-1) (hLAIR1) (CD antigen CD305)	LAIR1 CD305
LAMA1_HUMAN	Laminin subunit alpha-1 (Laminin A chain) (Laminin-1 subunit alpha) (Laminin-3 subunit alpha) (S-laminin subunit alpha) (S-LAM alpha)	LAMA1 LAMA
LAMA2_HUMAN	Laminin subunit alpha-2 (Laminin M chain) (Laminin-12 subunit alpha) (Laminin-2 subunit alpha) (Laminin-4 subunit alpha) (Merosin heavy chain)	LAMA2 LAMM
LAMA3_HUMAN	Laminin subunit alpha-3 (Epiligrin 170 kDa subunit) (E170) (Epiligrin subunit alpha) (Kalinin subunit alpha) (Laminin-5 subunit alpha) (Laminin-6 subunit alpha) (Laminin-7 subunit alpha) (Nicein subunit alpha)	LAMA3 LAMNA
LAMA4_HUMAN	Laminin subunit alpha-4 (Laminin-14 subunit alpha) (Laminin-8 subunit alpha) (Laminin-9 subunit alpha)	LAMA4
LAMA5_HUMAN	Laminin subunit alpha-5 (Laminin-10 subunit alpha) (Laminin-11 subunit alpha) (Laminin-15 subunit alpha)	LAMA5 KIAA0533 KIAA1907
LAMB1_HUMAN	Laminin subunit beta-1 (Laminin B1 chain) (Laminin-1 subunit beta) (Laminin-10 subunit beta) (Laminin-12 subunit beta) (Laminin-2 subunit beta) (Laminin-6 subunit beta) (Laminin-8 subunit beta)	LAMB1
LAMB2_HUMAN	Laminin subunit beta-2 (Laminin B1s chain) (Laminin-11 subunit beta) (Laminin-14 subunit beta) (Laminin-15 subunit beta) (Laminin-3 subunit beta) (Laminin-4 subunit beta) (Laminin-7 subunit beta) (Laminin-9 subunit beta) (S-laminin subunit beta) (S-LAM beta)	LAMB2 LAMS
LAMC1_HUMAN	Laminin subunit gamma-1 (Laminin B2 chain) (Laminin-1 subunit gamma) (Laminin-10 subunit gamma) (Laminin-11 subunit gamma) (Laminin-2 subunit gamma) (Laminin-3 subunit gamma) (Laminin-4 subunit gamma) (Laminin-6 subunit gamma) (Laminin-7 subunit gamma) (Laminin-8 subunit gamma) (Laminin-9 subunit gamma) (S-laminin subunit gamma) (S-LAM gamma)	LAMC1 LAMB2
LAMC2_HUMAN	Laminin subunit gamma-2 (Cell-scattering factor 140 kDa subunit) (CSF 140 kDa subunit) (Epiligrin subunit gamma) (Kalinin subunit gamma) (Kalinin/nicein/epiligrin 100 kDa subunit) (Ladsin 140 kDa subunit) (Laminin B2t chain) (Laminin-5 subunit gamma) (Large adhesive scatter factor 140 kDa subunit) (Nicein subunit gamma)	LAMC2 LAMB2T LAMNB2
LAMP1_HUMAN	Lysosome-associated membrane glycoprotein 1 (LAMP-1) (Lysosome-associated membrane protein 1) (CD107 antigen-like family member A) (CD antigen CD107a)	LAMP1
LAMP2_HUMAN	Lysosome-associated membrane glycoprotein 2 (LAMP-2) (Lysosome-associated membrane protein 2) (CD107 antigen-like family member B) (CD antigen CD107b)	LAMP2
LAMP3_HUMAN	Lysosome-associated membrane glycoprotein 3 (LAMP-3) (Lysosomal-associated membrane protein 3) (DC-lysosome-associated membrane glycoprotein) (DC LAMP) (Protein TSC403) (CD antigen CD208)	LAMP3 DCLAMP TSC403
LCAP_HUMAN	Leucyl-cystinyl aminopeptidase (Cystinyl aminopeptidase) (EC 3.4.11.3) (Insulin-regulated membrane aminopeptidase) (Insulin-responsive aminopeptidase) (IRAP) (Oxytocinase) (OTase) (Placental leucine aminopeptidase) (P-LAP) [Cleaved into: Leucyl-cystinyl aminopeptidase, pregnancy serum form]	LNPEP OTASE
LCAT_HUMAN	Phosphatidylcholine-sterol acyltransferase (EC 2.3.1.43) (Lecithin-cholesterol acyltransferase) (Phospholipid-cholesterol acyltransferase)	LCAT
LFA3_HUMAN	Lymphocyte function-associated antigen 3 (Ag3) (Surface glycoprotein LFA-3) (CD antigen CD58)	CD58 LFA3
LFNG_HUMAN	Beta-1,3-N-acetylglucosaminyltransferase lunatic fringe (EC 2.4.1.222) (O-fucosylpeptide 3-beta-N-acetylglucosaminyltransferase)	LFNG
LG3BP_HUMAN	Galectin-3-binding protein (Basement membrane autoantigen p105) (Lectin galactoside-binding soluble 3-binding protein) (Mac-2-binding protein) (MAC2BP) (Mac-2 BP) (Tumor-associated antigen 90K)	LGALS3BP M2BP
LGMN_HUMAN	Legumain (EC 3.4.22.34) (Asparaginyl endopeptidase) (Protease, cysteine 1)	LGMN PRSC1
LICH_HUMAN	Lysosomal acid lipase/cholesteryl ester hydrolase (Acid cholesteryl ester hydrolase) (LAL) (EC 3.1.1.13) (Cholesteryl esterase) (Lipase A) (Sterol esterase)	LIPA
LIGO1_HUMAN	Leucine-rich repeat and immunoglobulin-like domain-containing nogo receptor-interacting protein 1 (Leucine-rich repeat and immunoglobulin domain-containing protein 1) (Leucine-rich repeat neuronal protein 1) (Leucine-rich repeat neuronal protein 6A)	LINGO1 LERN1 LRRN6A UNQ201/PRO227
LIPG_HUMAN	Gastric triacylglycerol lipase (GL) (Gastric lipase) (EC 3.1.1.3)	LIPF
LIRB5_HUMAN	Leukocyte immunoglobulin-like receptor subfamily B member 5 (CD85 antigen-like family member C) (Leukocyte immunoglobulin-like receptor 8) (LIR-8) (CD antigen CD85c)	LILRB5 LIR8
LMA2L_HUMAN	VIP36-like protein (Lectin mannose-binding 2-like) (LMAN2-like protein)	LMAN2L VIPL PSEC0028 UNQ368/PRO704
LMAN2_HUMAN	Vesicular integral-membrane protein VIP36 (Glycoprotein GP36b) (Lectin mannose-binding 2) (Vesicular integral-membrane protein 36) (VIP36)	LMAN2 C5orf8
LOXL2_HUMAN	Lysyl oxidase homolog 2 (EC 1.4.3.13) (Lysyl oxidase-like protein 2) (Lysyl oxidase-related protein 2) (Lysyl oxidase-related protein WS9-14)	LOXL2
LPP2_HUMAN	Lipid phosphate phosphohydrolase 2 (EC 3.1.3.4) (PAP2-gamma) (PAP2-G) (Phosphatidate phosphohydrolase type 2c) (Phosphatidic acid phosphatase 2c) (PAP-2c) (PAP2c)	PPAP2C LPP2
LRC15_HUMAN	Leucine-rich repeat-containing protein 15 (Leucine-rich repeat protein induced by beta-amyloid homolog) (hLib)	LRRC15 LIB
LRC8B_HUMAN	Leucine-rich repeat-containing protein 8B (T-cell activation leucine repeat-rich protein) (TA-LRRP)	LRRC8B KIAA0231 UNQ6413/PRO21207
LRP1_HUMAN	Prolow-density lipoprotein receptor-related protein 1 (LRP-1) (Alpha-2-macroglobulin receptor) (A2MR) (Apolipoprotein E receptor) (APOER) (CD antigen CD91) [Cleaved into: Low-density lipoprotein receptor-related protein 1 85 kDa subunit (LRP-85); Low-density lipoprotein receptor-related protein 1 515 kDa subunit (LRP-515); Low-density lipoprotein receptor-related protein 1 intracellular domain (L…	LRP1 A2MR APR
LRP2_HUMAN	Low-density lipoprotein receptor-related protein 2 (LRP-2) (Glycoprotein 330) (gp330) (Megalin)	LRP2
LSAMP_HUMAN	Limbic system-associated membrane protein (LSAMP) (IgLON family member 3)	LSAMP IGLON3 LAMP
LTBP1_HUMAN	Latent-transforming growth factor beta-binding protein 1 (LTBP-1) (Transforming growth factor beta-1-binding protein 1) (TGF-beta1-BP-1)	LTBP1
LTBP2_HUMAN	Latent-transforming growth factor beta-binding protein 2 (LTBP-2)	LTBP2 C14orf141 LTBP3
LTBP3_HUMAN	Latent-transforming growth factor beta-binding protein 3 (LTBP-3)	LTBP3
LTBP4_HUMAN	Latent-transforming growth factor beta-binding protein 4 (LTBP-4)	LTBP4
LUM_HUMAN	Lumican (Keratan sulfate proteoglycan lumican) (KSPG lumican)	LUM LDC SLRR2D
LY75_HUMAN	Lymphocyte antigen 75 (Ly-75) (C-type lectin domain family 13 member B) (DEC-205) (gp200-MR6) (CD antigen CD205)	LY75 CD205 CLEC13B
LYAG_HUMAN	Lysosomal alpha-glucosidase (EC 3.2.1.20) (Acid maltase) (Aglucosidase alfa) [Cleaved into: 76 kDa lysosomal alpha-glucosidase; 70 kDa lysosomal alpha-glucosidase]	GAA
LYAM1_HUMAN	L-selectin (CD62 antigen-like family member L) (Leukocyte adhesion molecule 1) (LAM-1) (Leukocyte surface antigen Leu-8) (Leukocyte-endothelial cell adhesion molecule 1) (LECAM1) (Lymph node homing receptor) (TQ1) (gp90-MEL) (CD antigen CD62L)	SELL LNHR LYAM1
LYAM2_HUMAN	E-selectin (CD62 antigen-like family member E) (Endothelial leukocyte adhesion molecule 1) (ELAM-1) (Leukocyte-endothelial cell adhesion molecule 2) (LECAM2) (CD antigen CD62E)	SELE ELAM1
LYAM3_HUMAN	P-selectin (CD62 antigen-like family member P) (Granule membrane protein 140) (GMP-140) (Leukocyte-endothelial cell adhesion molecule 3) (LECAM3) (Platelet activation dependent granule-external membrane protein) (PADGEM) (CD antigen CD62P)	SELP GMRP GRMP
LYOX_HUMAN	Protein-lysine 6-oxidase (EC 1.4.3.13) (Lysyl oxidase)	LOX
LYPD3_HUMAN	Ly6/PLAUR domain-containing protein 3 (GPI-anchored metastasis-associated protein C4.4A homolog) (Matrigel-induced gene C4 protein) (MIG-C4)	LYPD3 C4.4A UNQ491/PRO1007
LYPD5_HUMAN	Ly6/PLAUR domain-containing protein 5	LYPD5 UNQ1908/PRO4356
LYVE1_HUMAN	Lymphatic vessel endothelial hyaluronic acid receptor 1 (LYVE-1) (Cell surface retention sequence-binding protein 1) (CRSBP-1) (Extracellular link domain-containing protein 1) (Hyaluronic acid receptor)	LYVE1 CRSBP1 HAR XLKD1 UNQ230/PRO263
MA2A2_HUMAN	Alpha-mannosidase 2x (EC 3.2.1.114) (Alpha-mannosidase IIx) (Man IIx) (Mannosidase alpha class 2A member 2) (Mannosyl-oligosaccharide 1,3-1,6-alpha-mannosidase)	MAN2A2 MANA2X
MA2B1_HUMAN	Lysosomal alpha-mannosidase (Laman) (EC 3.2.1.24) (Lysosomal acid alpha-mannosidase) (Mannosidase alpha class 2B member 1) (Mannosidase alpha-B) [Cleaved into: Lysosomal alpha-mannosidase A peptide; Lysosomal alpha-mannosidase B peptide; Lysosomal alpha-mannosidase C peptide; Lysosomal alpha-mannosidase D peptide; Lysosomal alpha-mannosidase E peptide]	MAN2B1 LAMAN MANB
MANBA_HUMAN	Beta-mannosidase (EC 3.2.1.25) (Lysosomal beta A mannosidase) (Mannanase) (Mannase)	MANBA MANB1
MARCO_HUMAN	Macrophage receptor MARCO (Macrophage receptor with collagenous structure) (Scavenger receptor class A member 2)	MARCO SCARA2
MBRL_HUMAN	Membralin (Transmembrane protein 259)	TMEM259 C19orf6
MCEM1_HUMAN	Mast cell-expressed membrane protein 1	MCEMP1 C19orf59
MCLN1_HUMAN	Mucolipin-1 (MG-2) (Mucolipidin)	MCOLN1 ML4 MSTP080
MERTK_HUMAN	Tyrosine-protein kinase Mer (EC 2.7.10.1) (Proto-oncogene c-Mer) (Receptor tyrosine kinase MerTK)	MERTK MER
MFAP4_HUMAN	Microfibril-associated glycoprotein 4	MFAP4
MFGM_HUMAN	Lactadherin (Breast epithelial antigen BA46) (HMFG) (MFGM) (Milk fat globule-EGF factor 8) (MFG-E8) (SED1) [Cleaved into: Lactadherin short form; Medin]	MFGE8
MGA_HUMAN	Maltase-glucoamylase, intestinal [Includes: Maltase (EC 3.2.1.20) (Alpha-glucosidase); Glucoamylase (EC 3.2.1.3) (Glucan 1,4-alpha-glucosidase)]	MGAM MGA MGAML
MGAL1_HUMAN	Putative maltase-glucoamylase-like protein FLJ16351 (EC 3.2.1.-)	0
MIA3_HUMAN	Melanoma inhibitory activity protein 3 (C219-reactive peptide) (D320) (Transport and Golgi organization protein 1)	MIA3 KIAA0268 TANGO TANGO1 UNQ6077/PRO20088
MIME_HUMAN	Mimecan (Osteoglycin) (Osteoinductive factor) (OIF)	OGN OIF SLRR3A
MMP1_HUMAN	Interstitial collagenase (EC 3.4.24.7) (Fibroblast collagenase) (Matrix metalloproteinase-1) (MMP-1) [Cleaved into: 22 kDa interstitial collagenase; 27 kDa interstitial collagenase]	MMP1 CLG
MMP13_HUMAN	Collagenase 3 (EC 3.4.24.-) (Matrix metalloproteinase-13) (MMP-13)	MMP13
MMP23_HUMAN	Matrix metalloproteinase-23 (MMP-23) (EC 3.4.24.-) (Femalysin) (MIFR-1) (Matrix metalloproteinase-21) (MMP-21) (Matrix metalloproteinase-22) (MMP-22) [Cleaved into: Matrix metalloproteinase-23, soluble form]	MMP23A MMP21; MMP23B MMP21 MMP22
MMP8_HUMAN	Neutrophil collagenase (EC 3.4.24.34) (Matrix metalloproteinase-8) (MMP-8) (PMNL collagenase) (PMNL-CL)	MMP8 CLG1
MMRN1_HUMAN	Multimerin-1 (EMILIN-4) (Elastin microfibril interface located protein 4) (Elastin microfibril interfacer 4) (Endothelial cell multimerin) [Cleaved into: Platelet glycoprotein Ia*; 155 kDa platelet multimerin (p-155) (p155)]	MMRN1 ECM EMILIN4 GPIA* MMRN
MMRN2_HUMAN	Multimerin-2 (EMILIN-3) (Elastin microfibril interface located protein 3) (Elastin microfibril interfacer 3) (EndoGlyx-1 p125/p140 subunit)	MMRN2 EMILIN3
MO2R1_HUMAN	Cell surface glycoprotein CD200 receptor 1 (CD200 cell surface glycoprotein receptor) (Cell surface glycoprotein OX2 receptor 1)	CD200R1 CD200R CRTR2 MOX2R OX2R UNQ2522/PRO6015
MPRD_HUMAN	Cation-dependent mannose-6-phosphate receptor (CD Man-6-P receptor) (CD-MPR) (46 kDa mannose 6-phosphate receptor) (MPR 46)	M6PR MPR46 MPRD
MPRI_HUMAN	Cation-independent mannose-6-phosphate receptor (CI Man-6-P receptor) (CI-MPR) (M6PR) (300 kDa mannose 6-phosphate receptor) (MPR 300) (Insulin-like growth factor 2 receptor) (Insulin-like growth factor II receptor) (IGF-II receptor) (M6P/IGF2 receptor) (M6P/IGF2R) (CD antigen CD222)	IGF2R MPRI
MPZL1_HUMAN	Myelin protein zero-like protein 1 (Protein zero-related)	MPZL1 PZR UNQ849/PRO1787
MPZL2_HUMAN	Myelin protein zero-like protein 2 (Epithelial V-like antigen 1)	MPZL2 EVA EVA1 UNQ606/PRO1192
MRC2_HUMAN	C-type mannose receptor 2 (C-type lectin domain family 13 member E) (Endocytic receptor 180) (Macrophage mannose receptor 2) (Urokinase-type plasminogen activator receptor-associated protein) (UPAR-associated protein) (Urokinase receptor-associated protein) (CD antigen CD280)	MRC2 CLEC13E ENDO180 KIAA0709 UPARAP
MSLN_HUMAN	Mesothelin (CAK1 antigen) (Pre-pro-megakaryocyte-potentiating factor) [Cleaved into: Megakaryocyte-potentiating factor (MPF); Mesothelin, cleaved form]	MSLN MPF
MSRE_HUMAN	Macrophage scavenger receptor types I and II (Macrophage acetylated LDL receptor I and II) (Scavenger receptor class A member 1) (CD antigen CD204)	MSR1 SCARA1
MUC18_HUMAN	Cell surface glycoprotein MUC18 (Cell surface glycoprotein P1H12) (Melanoma cell adhesion molecule) (Melanoma-associated antigen A32) (Melanoma-associated antigen MUC18) (S-endo 1 endothelial-associated antigen) (CD antigen CD146)	MCAM MUC18
MUC2_HUMAN	Mucin-2 (MUC-2) (Intestinal mucin-2)	MUC2 SMUC
MUC4_HUMAN	Mucin-4 (MUC-4) (Ascites sialoglycoprotein) (ASGP) (Pancreatic adenocarcinoma mucin) (Testis mucin) (Tracheobronchial mucin) [Cleaved into: Mucin-4 alpha chain (Ascites sialoglycoprotein 1) (ASGP-1); Mucin-4 beta chain (Ascites sialoglycoprotein 2) (ASGP-2)]	MUC4
MUC5A_HUMAN	Mucin-5AC (MUC-5AC) (Gastric mucin) (Lewis B blood group antigen) (LeB) (Major airway glycoprotein) (Mucin-5 subtype AC, tracheobronchial) (Tracheobronchial mucin) (TBM) (Fragments)	MUC5AC MUC5
MUC5B_HUMAN	Mucin-5B (MUC-5B) (Cervical mucin) (High molecular weight salivary mucin MG1) (Mucin-5 subtype B, tracheobronchial) (Sublingual gland mucin)	MUC5B MUC5
MUC6_HUMAN	Mucin-6 (MUC-6) (Gastric mucin-6)	MUC6
MUC7_HUMAN	Mucin-7 (MUC-7) (Apo-MG2) (Salivary mucin-7)	MUC7 MG2
MUCB_HUMAN	Ig mu heavy chain disease protein (BOT)	0
MXRA5_HUMAN	Matrix-remodeling-associated protein 5 (Adhesion protein with leucine-rich repeats and immunoglobulin domains related to perlecan) (Adlican)	MXRA5
MXRA8_HUMAN	Matrix-remodeling-associated protein 8 (Limitrin)	MXRA8
MYH15_HUMAN	Myosin-15 (Myosin heavy chain 15)	MYH15 KIAA1000
MYP0_HUMAN	Myelin protein P0 (Myelin peripheral protein) (MPP) (Myelin protein zero)	MPZ
NAAA_HUMAN	N-acylethanolamine-hydrolyzing acid amidase (EC 3.5.1.-) (Acid ceramidase-like protein) (N-acylsphingosine amidohydrolase-like) (ASAH-like protein) [Cleaved into: N-acylethanolamine-hydrolyzing acid amidase subunit alpha; N-acylethanolamine-hydrolyzing acid amidase subunit beta]	NAAA ASAHL PLT
NADL2_HUMAN	Inactive N-acetylated-alpha-linked acidic dipeptidase-like protein 2 (NAALADase L2)	NAALADL2
NAGAB_HUMAN	Alpha-N-acetylgalactosaminidase (EC 3.2.1.49) (Alpha-galactosidase B)	NAGA
NAGPA_HUMAN	N-acetylglucosamine-1-phosphodiester alpha-N-acetylglucosaminidase (EC 3.1.4.45) (Mannose 6-phosphate-uncovering enzyme) (Phosphodiester alpha-GlcNAcase)	NAGPA
NAV2_HUMAN	Neuron navigator 2 (EC 3.6.4.12) (Helicase APC down-regulated 1) (Pore membrane and/or filament-interacting-like protein 2) (Retinoic acid inducible in neuroblastoma 1) (Steerin-2) (Unc-53 homolog 2) (unc53H2)	NAV2 HELAD1 KIAA1419 POMFIL2 RAINB1 STEERIN2
NCAM1_HUMAN	Neural cell adhesion molecule 1 (N-CAM-1) (NCAM-1) (CD antigen CD56)	NCAM1 NCAM
NCAM2_HUMAN	Neural cell adhesion molecule 2 (N-CAM-2) (NCAM-2)	NCAM2 NCAM21
NCEH1_HUMAN	Neutral cholesterol ester hydrolase 1 (NCEH) (EC 3.1.1.-) (Arylacetamide deacetylase-like 1)	NCEH1 AADACL1 KIAA1363
NCKX6_HUMAN	Sodium/potassium/calcium exchanger 6, mitochondrial (Na(+)/K(+)/Ca(2+)-exchange protein 6) (Sodium/calcium exchanger protein, mitochondrial) (Solute carrier family 24 member 6)	SLC24A6 NCKX6 NCLX
NDST1_HUMAN	Bifunctional heparan sulfate N-deacetylase/N-sulfotransferase 1 (EC 2.8.2.8) (Glucosaminyl N-deacetylase/N-sulfotransferase 1) (NDST-1) (N-heparan sulfate sulfotransferase 1) (N-HSST 1) ([Heparan sulfate]-glucosamine N-sulfotransferase 1) (HSNST 1) [Includes: Heparan sulfate N-deacetylase 1 (EC 3.-.-.-); Heparan sulfate N-sulfotransferase 1 (EC 2.8.2.-)]	NDST1 HSST HSST1
NEO1_HUMAN	Neogenin (Immunoglobulin superfamily DCC subclass member 2)	NEO1 IGDCC2 NGN
NEUS_HUMAN	Neuroserpin (Peptidase inhibitor 12) (PI-12) (Serpin I1)	SERPINI1 PI12
NHLC3_HUMAN	NHL repeat-containing protein 3	NHLRC3
NICA_HUMAN	Nicastrin	NCSTN KIAA0253 UNQ1874/PRO4317
NID2_HUMAN	Nidogen-2 (NID-2) (Osteonidogen)	NID2
NMDE2_HUMAN	Glutamate receptor ionotropic, NMDA 2B (GluN2B) (Glutamate [NMDA] receptor subunit epsilon-2) (N-methyl D-aspartate receptor subtype 2B) (NMDAR2B) (NR2B) (N-methyl-D-aspartate receptor subunit 3) (NR3) (hNR3)	GRIN2B NMDAR2B
NOE1_HUMAN	Noelin (Neuronal olfactomedin-related ER localized protein) (Olfactomedin-1)	OLFM1 NOE1 NOEL1
NOTC2_HUMAN	Neurogenic locus notch homolog protein 2 (Notch 2) (hN2) [Cleaved into: Notch 2 extracellular truncation; Notch 2 intracellular domain]	NOTCH2
NPC1_HUMAN	Niemann-Pick C1 protein	NPC1
NPTN_HUMAN	Neuroplastin (Stromal cell-derived receptor 1) (SDR-1)	NPTN SDFR1 SDR1
NRCAM_HUMAN	Neuronal cell adhesion molecule (Nr-CAM) (Neuronal surface protein Bravo) (hBravo) (NgCAM-related cell adhesion molecule) (Ng-CAM-related)	NRCAM KIAA0343
NRP1_HUMAN	Neuropilin-1 (Vascular endothelial cell growth factor 165 receptor) (CD antigen CD304)	NRP1 NRP VEGF165R
NTRK2_HUMAN	BDNF/NT-3 growth factors receptor (EC 2.7.10.1) (GP145-TrkB) (Trk-B) (Neurotrophic tyrosine kinase receptor type 2) (TrkB tyrosine kinase) (Tropomyosin-related kinase B)	NTRK2 TRKB
OLFL1_HUMAN	Olfactomedin-like protein 1	OLFML1 UNQ564/PRO1126
OLFL3_HUMAN	Olfactomedin-like protein 3 (HNOEL-iso) (hOLF44)	OLFML3 PSEC0035 PSEC0173 PSEC0244 UNQ663/PRO1294
OLFM4_HUMAN	Olfactomedin-4 (OLM4) (Antiapoptotic protein GW112) (G-CSF-stimulated clone 1 protein) (hGC-1) (hOLfD)	OLFM4 GW112 UNQ362/PRO698
OLM2B_HUMAN	Olfactomedin-like protein 2B (Photomedin-2)	OLFML2B
OMD_HUMAN	Osteomodulin (Keratan sulfate proteoglycan osteomodulin) (KSPG osteomodulin) (Osteoadherin) (OSAD)	OMD SLRR2C UNQ190/PRO216
OS9_HUMAN	Protein OS-9 (Amplified in osteosarcoma 9)	OS9
OSBP2_HUMAN	Oxysterol-binding protein 2 (Oxysterol-binding protein-related protein 4) (ORP-4) (OSBP-related protein 4)	OSBP2 KIAA1664 ORP4 OSBPL4
OSMR_HUMAN	Oncostatin-M-specific receptor subunit beta (Interleukin-31 receptor subunit beta) (IL-31 receptor subunit beta) (IL-31R subunit beta) (IL-31R-beta) (IL-31RB)	OSMR OSMRB
OSTM1_HUMAN	Osteopetrosis-associated transmembrane protein 1 (Chloride channel 7 beta subunit)	OSTM1 GL HSPC019 UNQ6098/PRO21201
OXLA_HUMAN	L-amino-acid oxidase (LAAO) (LAO) (EC 1.4.3.2) (Interleukin-4-induced protein 1) (IL4-induced protein 1) (Protein Fig-1) (hFIG1)	IL4I1 FIG1 UNQ636/PRO1265
P2RX4_HUMAN	P2X purinoceptor 4 (P2X4) (ATP receptor) (Purinergic receptor)	P2RX4
P2RX7_HUMAN	P2X purinoceptor 7 (P2X7) (ATP receptor) (P2Z receptor) (Purinergic receptor)	P2RX7
P3H1_HUMAN	Prolyl 3-hydroxylase 1 (EC 1.14.11.7) (Growth suppressor 1) (Leucine- and proline-enriched proteoglycan 1) (Leprecan-1)	LEPRE1 GROS1 P3H1 PSEC0109
P4HA1_HUMAN	Prolyl 4-hydroxylase subunit alpha-1 (4-PH alpha-1) (EC 1.14.11.2) (Procollagen-proline,2-oxoglutarate-4-dioxygenase subunit alpha-1)	P4HA1 P4HA
P4HTM_HUMAN	Transmembrane prolyl 4-hydroxylase (P4H-TM) (EC 1.14.11.-) (Hypoxia-inducible factor prolyl hydroxylase 4) (HIF-PH4) (HIF-prolyl hydroxylase 4) (HPH-4)	P4HTM PH4
PAG15_HUMAN	Group XV phospholipase A2 (EC 2.3.1.-) (1-O-acylceramide synthase) (ACS) (LCAT-like lysophospholipase) (LLPL) (Lysophospholipase 3) (Lysosomal phospholipase A2) (LPLA2)	PLA2G15 LYPLA3 UNQ341/PRO540
PBIP1_HUMAN	Pre-B-cell leukemia transcription factor-interacting protein 1 (Hematopoietic PBX-interacting protein)	PBXIP1 HPIP
PCDGK_HUMAN	Protocadherin gamma-C3 (PCDH-gamma-C3) (Protocadherin-2) (Protocadherin-43) (PC-43)	PCDHGC3 PCDH2
PCDH1_HUMAN	Protocadherin-1 (Cadherin-like protein 1) (Protocadherin-42) (PC42)	PCDH1
PCDH7_HUMAN	Protocadherin-7 (Brain-heart protocadherin) (BH-Pcdh)	PCDH7 BHPCDH
PCFT_HUMAN	Proton-coupled folate transporter (G21) (Heme carrier protein 1) (PCFT/HCP1) (Solute carrier family 46 member 1)	SLC46A1 HCP1 PCFT
PCM1_HUMAN	Pericentriolar material 1 protein (PCM-1) (hPCM-1)	PCM1
PCYOX_HUMAN	Prenylcysteine oxidase 1 (EC 1.8.3.5) (Prenylcysteine lyase)	PCYOX1 KIAA0908 PCL1 UNQ597/PRO1183
PD1L1_HUMAN	Programmed cell death 1 ligand 1 (PD-L1) (PDCD1 ligand 1) (Programmed death ligand 1) (B7 homolog 1) (B7-H1) (CD antigen CD274)	CD274 B7H1 PDCD1L1 PDCD1LG1 PDL1
PECA1_HUMAN	Platelet endothelial cell adhesion molecule (PECAM-1) (EndoCAM) (GPIIA') (PECA1) (CD antigen CD31)	PECAM1
PEDF_HUMAN	Pigment epithelium-derived factor (PEDF) (Cell proliferation-inducing gene 35 protein) (EPC-1) (Serpin F1)	SERPINF1 PEDF PIG35
PERF_HUMAN	Perforin-1 (P1) (Cytolysin) (Lymphocyte pore-forming protein) (PFP)	PRF1 PFP
PERM_HUMAN	Myeloperoxidase (MPO) (EC 1.11.2.2) [Cleaved into: Myeloperoxidase; 89 kDa myeloperoxidase; 84 kDa myeloperoxidase; Myeloperoxidase light chain; Myeloperoxidase heavy chain]	MPO
PGAP3_HUMAN	Post-GPI attachment to proteins factor 3 (COS16 homolog) (hCOS16) (Gene coamplified with ERBB2 protein) (PER1-like domain-containing protein 1)	PGAP3 CAB2 PERLD1 UNQ546/PRO1100
PGBM_HUMAN	Basement membrane-specific heparan sulfate proteoglycan core protein (HSPG) (Perlecan) (PLC) [Cleaved into: Endorepellin; LG3 peptide]	HSPG2
PGCA_HUMAN	Aggrecan core protein (Cartilage-specific proteoglycan core protein) (CSPCP) (Chondroitin sulfate proteoglycan core protein 1) (Chondroitin sulfate proteoglycan 1) [Cleaved into: Aggrecan core protein 2]	ACAN AGC1 CSPG1 MSK16
PGFRA_HUMAN	Platelet-derived growth factor receptor alpha (PDGF-R-alpha) (PDGFR-alpha) (EC 2.7.10.1) (Alpha platelet-derived growth factor receptor) (Alpha-type platelet-derived growth factor receptor) (CD140 antigen-like family member A) (CD140a antigen) (Platelet-derived growth factor alpha receptor) (Platelet-derived growth factor receptor 2) (PDGFR-2) (CD antigen CD140a)	PDGFRA PDGFR2 RHEPDGFRA
PGFRB_HUMAN	Platelet-derived growth factor receptor beta (PDGF-R-beta) (PDGFR-beta) (EC 2.7.10.1) (Beta platelet-derived growth factor receptor) (Beta-type platelet-derived growth factor receptor) (CD140 antigen-like family member B) (Platelet-derived growth factor receptor 1) (PDGFR-1) (CD antigen CD140b)	PDGFRB PDGFR PDGFR1
PGRP2_HUMAN	N-acetylmuramoyl-L-alanine amidase (EC 3.5.1.28) (Peptidoglycan recognition protein 2) (Peptidoglycan recognition protein long) (PGRP-L)	PGLYRP2 PGLYRPL PGRPL UNQ3103/PRO10102
PGS1_HUMAN	Biglycan (Bone/cartilage proteoglycan I) (PG-S1)	BGN SLRR1A
PGS2_HUMAN	Decorin (Bone proteoglycan II) (PG-S2) (PG40)	DCN SLRR1B
PHLD_HUMAN	Phosphatidylinositol-glycan-specific phospholipase D (PI-G PLD) (EC 3.1.4.50) (Glycoprotein phospholipase D) (Glycosyl-phosphatidylinositol-specific phospholipase D) (GPI-PLD) (GPI-specific phospholipase D)	GPLD1 PIGPLD1
PI16_HUMAN	Peptidase inhibitor 16 (PI-16) (Cysteine-rich secretory protein 9) (CRISP-9) (PSP94-binding protein)	PI16 CRISP9 PSPBP PSEC0164 UNQ289/PRO328
PIEZ1_HUMAN	Piezo-type mechanosensitive ion channel component 1 (Membrane protein induced by beta-amyloid treatment) (Mib) (Protein FAM38A)	PIEZO1 FAM38A KIAA0233
PIGR_HUMAN	Polymeric immunoglobulin receptor (PIgR) (Poly-Ig receptor) (Hepatocellular carcinoma-associated protein TB6) [Cleaved into: Secretory component]	PIGR
PILRA_HUMAN	Paired immunoglobulin-like type 2 receptor alpha (Cell surface receptor FDF03) (Inhibitory receptor PILR-alpha)	PILRA
PIP_HUMAN	Prolactin-inducible protein (Gross cystic disease fluid protein 15) (GCDFP-15) (Prolactin-induced protein) (Secretory actin-binding protein) (SABP) (gp17)	PIP GCDFP15 GPIP4
PLBL1_HUMAN	Phospholipase B-like 1 (EC 3.1.1.-) (LAMA-like protein 1) (Lamina ancestor homolog 1) (Phospholipase B domain-containing protein 1)	PLBD1
PLD3_HUMAN	Phospholipase D3 (PLD 3) (EC 3.1.4.4) (Choline phosphatase 3) (HindIII K4L homolog) (Hu-K4) (Phosphatidylcholine-hydrolyzing phospholipase D3)	PLD3
PLD4_HUMAN	Phospholipase D4 (PLD 4) (EC 3.1.4.4) (Choline phosphatase 4) (Phosphatidylcholine-hydrolyzing phospholipase D4)	PLD4 C14orf175 UNQ2488/PRO5775
PLMN_HUMAN	Plasminogen (EC 3.4.21.7) [Cleaved into: Plasmin heavy chain A; Activation peptide; Angiostatin; Plasmin heavy chain A, short form; Plasmin light chain B]	PLG
PLOD1_HUMAN	Procollagen-lysine,2-oxoglutarate 5-dioxygenase 1 (EC 1.14.11.4) (Lysyl hydroxylase 1) (LH1)	PLOD1 LLH PLOD
PLOD2_HUMAN	Procollagen-lysine,2-oxoglutarate 5-dioxygenase 2 (EC 1.14.11.4) (Lysyl hydroxylase 2) (LH2)	PLOD2
PLOD3_HUMAN	Procollagen-lysine,2-oxoglutarate 5-dioxygenase 3 (EC 1.14.11.4) (Lysyl hydroxylase 3) (LH3)	PLOD3
PLTP_HUMAN	Phospholipid transfer protein (Lipid transfer protein II)	PLTP
PLVAP_HUMAN	Plasmalemma vesicle-associated protein (Fenestrated endothelial-linked structure protein) (Plasmalemma vesicle protein 1) (PV-1)	PLVAP FELS PV1
PLXA1_HUMAN	Plexin-A1 (Semaphorin receptor NOV)	PLXNA1 NOV PLXN1
PLXB2_HUMAN	Plexin-B2 (MM1)	PLXNB2 KIAA0315
PLXC1_HUMAN	Plexin-C1 (Virus-encoded semaphorin protein receptor) (CD antigen CD232)	PLXNC1 VESPR
PLXD1_HUMAN	Plexin-D1	PLXND1 KIAA0620
PO210_HUMAN	Nuclear pore membrane glycoprotein 210 (Nuclear pore protein gp210) (Nuclear envelope pore membrane protein POM 210) (POM210) (Nucleoporin Nup210) (Pore membrane protein of 210 kDa)	NUP210 KIAA0906 PSEC0245
PODN_HUMAN	Podocan	PODN SLRR5A UNQ293/PRO332
PON1_HUMAN	Serum paraoxonase/arylesterase 1 (PON 1) (EC 3.1.1.2) (EC 3.1.1.81) (EC 3.1.8.1) (Aromatic esterase 1) (A-esterase 1) (K-45) (Serum aryldialkylphosphatase 1)	PON1 PON
PON2_HUMAN	Serum paraoxonase/arylesterase 2 (PON 2) (EC 3.1.1.2) (EC 3.1.1.81) (Aromatic esterase 2) (A-esterase 2) (Serum aryldialkylphosphatase 2)	PON2
POSTN_HUMAN	Periostin (PN) (Osteoblast-specific factor 2) (OSF-2)	POSTN OSF2
PPAL_HUMAN	Lysosomal acid phosphatase (LAP) (EC 3.1.3.2)	ACP2
PPAP_HUMAN	Prostatic acid phosphatase (PAP) (EC 3.1.3.2) (5'-nucleotidase) (5'-NT) (EC 3.1.3.5) (Ecto-5'-nucleotidase) (Thiamine monophosphatase) (TMPase) [Cleaved into: PAPf39]	ACPP
PPGB_HUMAN	Lysosomal protective protein (EC 3.4.16.5) (Carboxypeptidase C) (Carboxypeptidase L) (Cathepsin A) (Protective protein cathepsin A) (PPCA) (Protective protein for beta-galactosidase) [Cleaved into: Lysosomal protective protein 32 kDa chain; Lysosomal protective protein 20 kDa chain]	CTSA PPGB
PPIB_HUMAN	Peptidyl-prolyl cis-trans isomerase B (PPIase B) (EC 5.2.1.8) (CYP-S1) (Cyclophilin B) (Rotamase B) (S-cyclophilin) (SCYLP)	PPIB CYPB
PPT1_HUMAN	Palmitoyl-protein thioesterase 1 (PPT-1) (EC 3.1.2.22) (Palmitoyl-protein hydrolase 1)	PPT1 PPT
PRELP_HUMAN	Prolargin (Proline-arginine-rich end leucine-rich repeat protein)	PRELP SLRR2A
PRIO_HUMAN	Major prion protein (PrP) (ASCR) (PrP27-30) (PrP33-35C) (CD antigen CD230)	PRNP PRIP PRP
PRND_HUMAN	Prion-like protein doppel (PrPLP) (Prion protein 2)	PRND DPL UNQ1830/PRO3443
PROM1_HUMAN	Prominin-1 (Antigen AC133) (Prominin-like protein 1) (CD antigen CD133)	PROM1 PROML1 MSTP061
PROM2_HUMAN	Prominin-2 (PROM-2) (Prominin-like protein 2) (hPROML2)	PROM2 PROML2 UNQ2521/PRO6014
PRS23_HUMAN	Serine protease 23 (EC 3.4.21.-) (Putative secreted protein Zsig13)	PRSS23 ZSIG13 UNQ270/PRO307
PRS57_HUMAN	Serine protease 57 (EC 3.4.21.-) (Serine protease 1-like protein 1)	PRSS57 PRSSL1 UNQ782/PRO1599
PSCA_HUMAN	Prostate stem cell antigen	PSCA UNQ206/PRO232
PTGDS_HUMAN	Prostaglandin-H2 D-isomerase (EC 5.3.99.2) (Beta-trace protein) (Cerebrin-28) (Glutathione-independent PGD synthase) (Lipocalin-type prostaglandin-D synthase) (Prostaglandin-D2 synthase) (PGD2 synthase) (PGDS) (PGDS2)	PTGDS PDS
PTK7_HUMAN	Inactive tyrosine-protein kinase 7 (Colon carcinoma kinase 4) (CCK-4) (Protein-tyrosine kinase 7) (Pseudo tyrosine kinase receptor 7) (Tyrosine-protein kinase-like 7)	PTK7 CCK4
PTPR2_HUMAN	Receptor-type tyrosine-protein phosphatase N2 (R-PTP-N2) (EC 3.1.3.48) (Islet cell autoantigen-related protein) (IAR) (ICAAR) (Phogrin)	PTPRN2 KIAA0387
PTPRC_HUMAN	Receptor-type tyrosine-protein phosphatase C (EC 3.1.3.48) (Leukocyte common antigen) (L-CA) (T200) (CD antigen CD45)	PTPRC CD45
PTPRF_HUMAN	Receptor-type tyrosine-protein phosphatase F (EC 3.1.3.48) (Leukocyte common antigen related) (LAR)	PTPRF LAR
PTPRJ_HUMAN	Receptor-type tyrosine-protein phosphatase eta (Protein-tyrosine phosphatase eta) (R-PTP-eta) (EC 3.1.3.48) (Density-enhanced phosphatase 1) (DEP-1) (HPTP eta) (Protein-tyrosine phosphatase receptor type J) (R-PTP-J) (CD antigen CD148)	PTPRJ DEP1
PTPRK_HUMAN	Receptor-type tyrosine-protein phosphatase kappa (Protein-tyrosine phosphatase kappa) (R-PTP-kappa) (EC 3.1.3.48)	PTPRK PTPK
PVR_HUMAN	Poliovirus receptor (Nectin-like protein 5) (NECL-5) (CD antigen CD155)	PVR PVS
PVRL1_HUMAN	Poliovirus receptor-related protein 1 (Herpes virus entry mediator C) (Herpesvirus entry mediator C) (HveC) (Herpesvirus Ig-like receptor) (HIgR) (Nectin-1) (CD antigen CD111)	PVRL1 HVEC PRR1
PXDC2_HUMAN	Plexin domain-containing protein 2 (Tumor endothelial marker 7-related protein)	PLXDC2 TEM7R UNQ2514/PRO6003
PXDN_HUMAN	Peroxidasin homolog (EC 1.11.1.7) (Melanoma-associated antigen MG50) (Vascular peroxidase 1) (p53-responsive gene 2 protein)	PXDN KIAA0230 MG50 PRG2 VPO VPO1
QPCT_HUMAN	Glutaminyl-peptide cyclotransferase (EC 2.3.2.5) (Glutaminyl cyclase) (QC) (sQC) (Glutaminyl-tRNA cyclotransferase) (Glutamyl cyclase) (EC)	QPCT
RECK_HUMAN	Reversion-inducing cysteine-rich protein with Kazal motifs (hRECK) (Suppressor of tumorigenicity 15 protein)	RECK ST15
RFNG_HUMAN	Beta-1,3-N-acetylglucosaminyltransferase radical fringe (EC 2.4.1.222) (O-fucosylpeptide 3-beta-N-acetylglucosaminyltransferase)	RFNG
RNAS1_HUMAN	Ribonuclease pancreatic (EC 3.1.27.5) (HP-RNase) (RIB-1) (RNase UpI-1) (Ribonuclease 1) (RNase 1) (Ribonuclease A) (RNase A)	RNASE1 RIB1 RNS1
RNAS6_HUMAN	Ribonuclease K6 (RNase K6) (EC 3.1.27.-)	RNASE6 RNS6
ROBO1_HUMAN	Roundabout homolog 1 (Deleted in U twenty twenty) (H-Robo-1)	ROBO1 DUTT1
RON_HUMAN	Macrophage-stimulating protein receptor (MSP receptor) (EC 2.7.10.1) (CDw136) (Protein-tyrosine kinase 8) (p185-Ron) (CD antigen CD136) [Cleaved into: Macrophage-stimulating protein receptor alpha chain; Macrophage-stimulating protein receptor beta chain]	MST1R PTK8 RON
ROS1_HUMAN	Proto-oncogene tyrosine-protein kinase ROS (EC 2.7.10.1) (Proto-oncogene c-Ros) (Proto-oncogene c-Ros-1) (Receptor tyrosine kinase c-ros oncogene 1) (c-Ros receptor tyrosine kinase)	ROS1 MCF3 ROS
RTBDN_HUMAN	Retbindin	RTBDN
S12A2_HUMAN	Solute carrier family 12 member 2 (Basolateral Na-K-Cl symporter) (Bumetanide-sensitive sodium-(potassium)-chloride cotransporter 1)	SLC12A2 NKCC1
S15A1_HUMAN	Solute carrier family 15 member 1 (Intestinal H(+)/peptide cotransporter) (Oligopeptide transporter, small intestine isoform) (Peptide transporter 1)	SLC15A1 PEPT1
S15A4_HUMAN	Solute carrier family 15 member 4 (Peptide transporter 4) (Peptide/histidine transporter 1) (hPHT1)	SLC15A4 PHT1 PTR4 FP12591
S1PR2_HUMAN	Sphingosine 1-phosphate receptor 2 (S1P receptor 2) (S1P2) (Endothelial differentiation G-protein coupled receptor 5) (Sphingosine 1-phosphate receptor Edg-5) (S1P receptor Edg-5)	S1PR2 EDG5
S28A3_HUMAN	Solute carrier family 28 member 3 (Concentrative Na(+)-nucleoside cotransporter 3) (CNT 3) (hCNT3)	SLC28A3 CNT3
S29A1_HUMAN	Equilibrative nucleoside transporter 1 (Equilibrative nitrobenzylmercaptopurine riboside-sensitive nucleoside transporter) (Equilibrative NBMPR-sensitive nucleoside transporter) (Nucleoside transporter, es-type) (Solute carrier family 29 member 1)	SLC29A1 ENT1
S39A6_HUMAN	Zinc transporter ZIP6 (Estrogen-regulated protein LIV-1) (Solute carrier family 39 member 6) (Zrt- and Irt-like protein 6) (ZIP-6)	SLC39A6 LIV1 ZIP6
S39AE_HUMAN	Zinc transporter ZIP14 (LIV-1 subfamily of ZIP zinc transporter 4) (LZT-Hs4) (Solute carrier family 39 member 14) (Zrt- and Irt-like protein 14) (ZIP-14)	SLC39A14 KIAA0062 ZIP14
S43A3_HUMAN	Solute carrier family 43 member 3 (Protein FOAP-13)	SLC43A3 PSEC0252
S6A14_HUMAN	Sodium- and chloride-dependent neutral and basic amino acid transporter B(0+) (Amino acid transporter ATB0+) (Solute carrier family 6 member 14)	SLC6A14
SAMP_HUMAN	Serum amyloid P-component (SAP) (9.5S alpha-1-glycoprotein) [Cleaved into: Serum amyloid P-component(1-203)]	APCS PTX2
SAP_HUMAN	Proactivator polypeptide [Cleaved into: Saposin-A (Protein A); Saposin-B-Val; Saposin-B (Cerebroside sulfate activator) (CSAct) (Dispersin) (Sphingolipid activator protein 1) (SAP-1) (Sulfatide/GM1 activator); Saposin-C (A1 activator) (Co-beta-glucosidase) (Glucosylceramidase activator) (Sphingolipid activator protein 2) (SAP-2); Saposin-D (Component C) (Protein C)]	PSAP GLBA SAP1
SATT_HUMAN	Neutral amino acid transporter A (Alanine/serine/cysteine/threonine transporter 1) (ASCT-1) (SATT) (Solute carrier family 1 member 4)	SLC1A4 ASCT1 SATT
SC5A1_HUMAN	Sodium/glucose cotransporter 1 (Na(+)/glucose cotransporter 1) (High affinity sodium-glucose cotransporter) (Solute carrier family 5 member 1)	SLC5A1 NAGT SGLT1
SC65_HUMAN	Synaptonemal complex protein SC65 (Leprecan-like protein 4) (Nucleolar autoantigen No55)	LEPREL4 NOL55 SC65
SCAP_HUMAN	Sterol regulatory element-binding protein cleavage-activating protein (SCAP) (SREBP cleavage-activating protein)	SCAP KIAA0199 PSEC0227
SCAR3_HUMAN	Scavenger receptor class A member 3 (Cellular stress response gene protein)	SCARA3 CSR
SCRB2_HUMAN	Lysosome membrane protein 2 (85 kDa lysosomal membrane sialoglycoprotein) (LGP85) (CD36 antigen-like 2) (Lysosome membrane protein II) (LIMP II) (Scavenger receptor class B member 2) (CD antigen CD36)	SCARB2 CD36L2 LIMPII
SCUB2_HUMAN	Signal peptide, CUB and EGF-like domain-containing protein 2 (Protein CEGP1)	SCUBE2 CEGP1
SCUB3_HUMAN	Signal peptide, CUB and EGF-like domain-containing protein 3	SCUBE3 CEGF3
SDK2_HUMAN	Protein sidekick-2	SDK2 KIAA1514
SE1L1_HUMAN	Protein sel-1 homolog 1 (Suppressor of lin-12-like protein 1) (Sel-1L)	SEL1L TSA305 UNQ128/PRO1063
SE1L3_HUMAN	Protein sel-1 homolog 3 (Suppressor of lin-12-like protein 3) (Sel-1L3)	SEL1L3 KIAA0746
SE6L1_HUMAN	Seizure 6-like protein	SEZ6L KIAA0927 UNQ2542/PRO6094
SE6L2_HUMAN	Seizure 6-like protein 2	SEZ6L2 PSK UNQ1903/PRO4349
SEM3C_HUMAN	Semaphorin-3C (Semaphorin-E) (Sema E)	SEMA3C SEMAE
SEM4A_HUMAN	Semaphorin-4A (Semaphorin-B) (Sema B)	SEMA4A SEMAB SEMB UNQ783/PRO1317
SEM4B_HUMAN	Semaphorin-4B	SEMA4B KIAA1745 SEMAC UNQ749/PRO1480
SEM4C_HUMAN	Semaphorin-4C	SEMA4C KIAA1739 SEMAI UNQ5855/PRO34487
SEM4D_HUMAN	Semaphorin-4D (A8) (BB18) (GR3) (CD antigen CD100)	SEMA4D C9orf164 CD100 SEMAJ
SEPP1_HUMAN	Selenoprotein P (SeP)	SEPP1 SELP
SEPR_HUMAN	Seprase (EC 3.4.21.-) (170 kDa melanoma membrane-bound gelatinase) (Fibroblast activation protein alpha) (Integral membrane serine protease)	FAP
SFRP4_HUMAN	Secreted frizzled-related protein 4 (sFRP-4) (Frizzled protein, human endometrium) (FrpHE)	SFRP4 FRPHE
SG2A2_HUMAN	Mammaglobin-A (Mammaglobin-1) (Secretoglobin family 2A member 2)	SCGB2A2 MGB1 UGB2
SGCB_HUMAN	Beta-sarcoglycan (Beta-SG) (43 kDa dystrophin-associated glycoprotein) (43DAG) (A3b)	SGCB
SGCE_HUMAN	Epsilon-sarcoglycan (Epsilon-SG)	SGCE ESG UNQ433/PRO840
SHBG_HUMAN	Sex hormone-binding globulin (SHBG) (Sex steroid-binding protein) (SBP) (Testis-specific androgen-binding protein) (ABP) (Testosterone-estradiol-binding globulin) (TeBG) (Testosterone-estrogen-binding globulin)	SHBG
SHPS1_HUMAN	Tyrosine-protein phosphatase non-receptor type substrate 1 (SHP substrate 1) (SHPS-1) (Brain Ig-like molecule with tyrosine-based activation motifs) (Bit) (CD172 antigen-like family member A) (Inhibitory receptor SHPS-1) (Macrophage fusion receptor) (MyD-1 antigen) (Signal-regulatory protein alpha-1) (Sirp-alpha-1) (Signal-regulatory protein alpha-2) (Sirp-alpha-2) (Signal-regulatory protein alph…	SIRPA BIT MFR MYD1 PTPNS1 SHPS1 SIRP
SIA4A_HUMAN	CMP-N-acetylneuraminate-beta-galactosamide-alpha-2,3-sialyltransferase 1 (Alpha 2,3-ST 1) (Beta-galactoside alpha-2,3-sialyltransferase 1) (EC 2.4.99.4) (Gal-NAc6S) (Gal-beta-1,3-GalNAc-alpha-2,3-sialyltransferase) (SIATFL) (ST3Gal I) (ST3GalI) (ST3GalA.1) (ST3O) (Sialyltransferase 4A) (SIAT4-A)	ST3GAL1 SIAT4 SIAT4A
SIA7B_HUMAN	Alpha-N-acetylgalactosaminide alpha-2,6-sialyltransferase 2 (EC 2.4.99.-) (GalNAc alpha-2,6-sialyltransferase II) (ST6GalNAc II) (ST6GalNAcII) (SThM) (Sialyltransferase 7B) (SIAT7-B)	ST6GALNAC2 SIAT7B SIATL1 STHM
SIA8D_HUMAN	CMP-N-acetylneuraminate-poly-alpha-2,8-sialyltransferase (EC 2.4.99.-) (Alpha-2,8-sialyltransferase 8D) (Polysialyltransferase-1) (Sialyltransferase 8D) (SIAT8-D) (Sialyltransferase St8Sia IV) (ST8SiaIV)	ST8SIA4 PST PST1 SIAT8D
SIAE_HUMAN	Sialate O-acetylesterase (EC 3.1.1.53) (H-Lse) (Sialic acid-specific 9-O-acetylesterase)	SIAE YSG2
SIAT1_HUMAN	Beta-galactoside alpha-2,6-sialyltransferase 1 (Alpha 2,6-ST 1) (EC 2.4.99.1) (B-cell antigen CD75) (CMP-N-acetylneuraminate-beta-galactosamide-alpha-2,6-sialyltransferase 1) (ST6Gal I) (ST6GalI) (Sialyltransferase 1)	ST6GAL1 SIAT1
SL9A9_HUMAN	Sodium/hydrogen exchanger 9 (Na(+)/H(+) exchanger 9) (NHE-9) (Solute carrier family 9 member 9)	SLC9A9 NHE9 Nbla00118
SLAF7_HUMAN	SLAM family member 7 (CD2 subset 1) (CD2-like receptor-activating cytotoxic cells) (CRACC) (Membrane protein FOAP-12) (Novel Ly9) (Protein 19A) (CD antigen CD319)	SLAMF7 CS1 UNQ576/PRO1138
SN_HUMAN	Sialoadhesin (Sialic acid-binding Ig-like lectin 1) (Siglec-1) (CD antigen CD169)	SIGLEC1 SN
SO4C1_HUMAN	Solute carrier organic anion transporter family member 4C1 (OATP-H) (Organic anion transporter M1) (OATP-M1) (Solute carrier family 21 member 20)	SLCO4C1 OATP4C1 OATPX SLC21A20
SODE_HUMAN	Extracellular superoxide dismutase [Cu-Zn] (EC-SOD) (EC 1.15.1.1)	SOD3
SORC2_HUMAN	VPS10 domain-containing receptor SorCS2	SORCS2 KIAA1329
SORL_HUMAN	Sortilin-related receptor (Low-density lipoprotein receptor relative with 11 ligand-binding repeats) (LDLR relative with 11 ligand-binding repeats) (LR11) (SorLA-1) (Sorting protein-related receptor containing LDLR class A repeats) (SorLA)	SORL1 C11orf32
SORT_HUMAN	Sortilin (100 kDa NT receptor) (Glycoprotein 95) (Gp95) (Neurotensin receptor 3) (NT3) (NTR3)	SORT1
SPD2A_HUMAN	SH3 and PX domain-containing protein 2A (Adapter protein TKS5) (Five SH3 domain-containing protein) (SH3 multiple domains protein 1) (Tyrosine kinase substrate with five SH3 domains)	SH3PXD2A FISH KIAA0418 SH3MD1 TKS5
SPHM_HUMAN	N-sulphoglucosamine sulphohydrolase (EC 3.10.1.1) (Sulfoglucosamine sulfamidase) (Sulphamidase)	SGSH HSS
SPON1_HUMAN	Spondin-1 (F-spondin) (Vascular smooth muscle cell growth-promoting factor)	SPON1 KIAA0762 VSGP
SPP2A_HUMAN	Signal peptide peptidase-like 2A (SPP-like 2A) (SPPL2a) (EC 3.4.23.-) (Intramembrane protease 3) (IMP-3) (Presenilin-like protein 2)	SPPL2A IMP3 PSL2 PSEC0147
SSRA_HUMAN	Translocon-associated protein subunit alpha (TRAP-alpha) (Signal sequence receptor subunit alpha) (SSR-alpha)	SSR1 TRAPA PSEC0262
SSRB_HUMAN	Translocon-associated protein subunit beta (TRAP-beta) (Signal sequence receptor subunit beta) (SSR-beta)	SSR2 TRAPB HSD25
ST14_HUMAN	Suppressor of tumorigenicity 14 protein (EC 3.4.21.109) (Matriptase) (Membrane-type serine protease 1) (MT-SP1) (Prostamin) (Serine protease 14) (Serine protease TADG-15) (Tumor-associated differentially-expressed gene 15 protein)	ST14 PRSS14 SNC19 TADG15
STAB1_HUMAN	Stabilin-1 (Fasciclin, EGF-like, laminin-type EGF-like and link domain-containing scavenger receptor 1) (FEEL-1) (MS-1 antigen)	STAB1 FEEL1 KIAA0246
STC2_HUMAN	Stanniocalcin-2 (STC-2) (Stanniocalcin-related protein) (STC-related protein) (STCRP)	STC2
STEA4_HUMAN	Metalloreductase STEAP4 (EC 1.16.1.-) (Six-transmembrane epithelial antigen of prostate 4) (SixTransMembrane protein of prostate 2) (Tumor necrosis factor, alpha-induced protein 9)	STEAP4 STAMP2 TNFAIP9
STIM1_HUMAN	Stromal interaction molecule 1	STIM1 GOK
STS_HUMAN	Steryl-sulfatase (EC 3.1.6.2) (Arylsulfatase C) (ASC) (Steroid sulfatase) (Steryl-sulfate sulfohydrolase)	STS ARSC1
STT3A_HUMAN	Dolichyl-diphosphooligosaccharide--protein glycosyltransferase subunit STT3A (Oligosaccharyl transferase subunit STT3A) (STT3-A) (EC 2.4.99.18) (B5) (Integral membrane protein 1) (Transmembrane protein TMC)	STT3A ITM1 TMC
STT3B_HUMAN	Dolichyl-diphosphooligosaccharide--protein glycosyltransferase subunit STT3B (Oligosaccharyl transferase subunit STT3B) (STT3-B) (EC 2.4.99.18) (Source of immunodominant MHC-associated peptides homolog)	STT3B SIMP
SULF1_HUMAN	Extracellular sulfatase Sulf-1 (hSulf-1) (EC 3.1.6.-)	SULF1 KIAA1077
SULF2_HUMAN	Extracellular sulfatase Sulf-2 (hSulf-2) (EC 3.1.6.-)	SULF2 KIAA1247 UNQ559/PRO1120
SUMF1_HUMAN	Sulfatase-modifying factor 1 (EC 1.8.99.-) (C-alpha-formylglycine-generating enzyme 1)	SUMF1 FGE PSEC0152 UNQ3037/PRO9852
SUN2_HUMAN	SUN domain-containing protein 2 (Protein unc-84 homolog B) (Rab5-interacting protein) (Rab5IP) (Sad1/unc-84 protein-like 2)	SUN2 FRIGG KIAA0668 RAB5IP UNC84B
SUSD2_HUMAN	Sushi domain-containing protein 2	SUSD2
SYPL1_HUMAN	Synaptophysin-like protein 1 (Pantophysin)	SYPL1 SYPL
T106B_HUMAN	Transmembrane protein 106B	TMEM106B
T132A_HUMAN	Transmembrane protein 132A (HSPA5-binding protein 1)	TMEM132A HSPA5BP1 KIAA1583
TARSH_HUMAN	Target of Nesh-SH3 (Tarsh) (ABI gene family member 3-binding protein) (Nesh-binding protein) (NeshBP)	ABI3BP NESHBP TARSH
TCO1_HUMAN	Transcobalamin-1 (TC-1) (Transcobalamin I) (TC I) (TCI)	TCN1 TC1
TENA_HUMAN	Tenascin (TN) (Cytotactin) (GMEM) (GP 150-225) (Glioma-associated-extracellular matrix antigen) (Hexabrachion) (JI) (Myotendinous antigen) (Neuronectin) (Tenascin-C) (TN-C)	TNC HXB
TENN_HUMAN	Tenascin-N (TN-N)	TNN
TENX_HUMAN	Tenascin-X (TN-X) (Hexabrachion-like protein)	TNXB HXBL TNX TNXB1 TNXB2 XB
TF_HUMAN	Tissue factor (TF) (Coagulation factor III) (Thromboplastin) (CD antigen CD142)	F3
TFPI1_HUMAN	Tissue factor pathway inhibitor (TFPI) (Extrinsic pathway inhibitor) (EPI) (Lipoprotein-associated coagulation inhibitor) (LACI)	TFPI LACI TFPI1
TFPI2_HUMAN	Tissue factor pathway inhibitor 2 (TFPI-2) (Placental protein 5) (PP5)	TFPI2
TFR1_HUMAN	Transferrin receptor protein 1 (TR) (TfR) (TfR1) (Trfr) (T9) (p90) (CD antigen CD71) [Cleaved into: Transferrin receptor protein 1, serum form (sTfR)]	TFRC
TGFB1_HUMAN	Transforming growth factor beta-1 (TGF-beta-1) [Cleaved into: Latency-associated peptide (LAP)]	TGFB1 TGFB
TGFB2_HUMAN	Transforming growth factor beta-2 (TGF-beta-2) (BSC-1 cell growth inhibitor) (Cetermin) (Glioblastoma-derived T-cell suppressor factor) (G-TSF) (Polyergin) [Cleaved into: Latency-associated peptide (LAP)]	TGFB2
TGFB3_HUMAN	Transforming growth factor beta-3 (TGF-beta-3) [Cleaved into: Latency-associated peptide (LAP)]	TGFB3
THA11_HUMAN	THAP domain-containing protein 11	THAP11 HRIHFB2206
THBG_HUMAN	Thyroxine-binding globulin (Serpin A7) (T4-binding globulin)	SERPINA7 TBG
THRB_HUMAN	Prothrombin (EC 3.4.21.5) (Coagulation factor II) [Cleaved into: Activation peptide fragment 1; Activation peptide fragment 2; Thrombin light chain; Thrombin heavy chain]	F2
THSD4_HUMAN	Thrombospondin type-1 domain-containing protein 4 (A disintegrin and metalloproteinase with thrombospondin motifs-like protein 6) (ADAMTS-like protein 6) (ADAMTSL-6)	THSD4 UNQ9334/PRO34005
THY1_HUMAN	Thy-1 membrane glycoprotein (CDw90) (Thy-1 antigen) (CD antigen CD90)	THY1
TIG1_HUMAN	Retinoic acid receptor responder protein 1 (RAR-responsive protein TIG1) (Tazarotene-induced gene 1 protein)	RARRES1 TIG1
TIMP1_HUMAN	Metalloproteinase inhibitor 1 (Erythroid-potentiating activity) (EPA) (Fibroblast collagenase inhibitor) (Collagenase inhibitor) (Tissue inhibitor of metalloproteinases 1) (TIMP-1)	TIMP1 CLGI TIMP
TINAL_HUMAN	Tubulointerstitial nephritis antigen-like (Glucocorticoid-inducible protein 5) (Oxidized LDL-responsive gene 2 protein) (OLRG-2) (Tubulointerstitial nephritis antigen-related protein) (TIN Ag-related protein) (TIN-Ag-RP)	TINAGL1 GIS5 LCN7 OLRG2 TINAGL PP6614 PSEC0088 UNQ204/PRO230
TLR2_HUMAN	Toll-like receptor 2 (Toll/interleukin-1 receptor-like protein 4) (CD antigen CD282)	TLR2 TIL4
TLR3_HUMAN	Toll-like receptor 3 (CD antigen CD283)	TLR3
TLR5_HUMAN	Toll-like receptor 5 (Toll/interleukin-1 receptor-like protein 3)	TLR5 TIL3
TLR8_HUMAN	Toll-like receptor 8 (CD antigen CD288)	TLR8 UNQ249/PRO286
TM181_HUMAN	Transmembrane protein 181	TMEM181 GPR178 KIAA1423
TM206_HUMAN	Transmembrane protein 206	TMEM206 C1orf75
TM2D1_HUMAN	TM2 domain-containing protein 1 (Beta-amyloid-binding protein) (hBBP)	TM2D1 BBP
TM87A_HUMAN	Transmembrane protein 87A	TMEM87A PSEC0094
TM9S3_HUMAN	Transmembrane 9 superfamily member 3 (EP70-P-iso) (SM-11044-binding protein)	TM9SF3 SMBP UNQ245/PRO282
TMCO3_HUMAN	Transmembrane and coiled-coil domain-containing protein 3 (Putative LAG1-interacting protein)	TMCO3 C13orf11 UNQ2419/PRO4976
TMED4_HUMAN	Transmembrane emp24 domain-containing protein 4 (Endoplasmic reticulum stress-response protein 25) (ERS25) (GMP25iso) (Putative NF-kappa-B-activating protein 156) (p24 family protein alpha-3) (p24alpha3)	TMED4 ERS25
TMED9_HUMAN	Transmembrane emp24 domain-containing protein 9 (GMP25) (Glycoprotein 25L2) (p24 family protein alpha-2) (p24alpha2) (p25)	TMED9 GP25L2
TMEM2_HUMAN	Transmembrane protein 2	TMEM2 KIAA1412
TMM59_HUMAN	Transmembrane protein 59 (Liver membrane-bound protein)	TMEM59 C1orf8 HSPC001 UNQ169/PRO195
TMM8A_HUMAN	Transmembrane protein 8A (Protein M83) (Transmembrane protein 6) (Transmembrane protein 8)	TMEM8A TMEM6 TMEM8
TNR3_HUMAN	Tumor necrosis factor receptor superfamily member 3 (Lymphotoxin-beta receptor) (Tumor necrosis factor C receptor) (Tumor necrosis factor receptor 2-related protein) (Tumor necrosis factor receptor type III) (TNF-RIII) (TNFR-III)	LTBR D12S370 TNFCR TNFR3 TNFRSF3
TNR6_HUMAN	Tumor necrosis factor receptor superfamily member 6 (Apo-1 antigen) (Apoptosis-mediating surface antigen FAS) (FASLG receptor) (CD antigen CD95)	FAS APT1 FAS1 TNFRSF6
TOIP1_HUMAN	Torsin-1A-interacting protein 1 (Lamin-associated protein 1B) (LAP1B)	TOR1AIP1
TOIP2_HUMAN	Torsin-1A-interacting protein 2 (Lumenal domain-like LAP1)	TOR1AIP2 LULL1
TPA_HUMAN	Tissue-type plasminogen activator (t-PA) (t-plasminogen activator) (tPA) (EC 3.4.21.68) (Alteplase) (Reteplase) [Cleaved into: Tissue-type plasminogen activator chain A; Tissue-type plasminogen activator chain B]	PLAT
TPBG_HUMAN	Trophoblast glycoprotein (5T4 oncofetal antigen) (5T4 oncofetal trophoblast glycoprotein) (5T4 oncotrophoblast glycoprotein) (M6P1)	TPBG 5T4
TPP1_HUMAN	Tripeptidyl-peptidase 1 (TPP-1) (EC 3.4.14.9) (Cell growth-inhibiting gene 1 protein) (Lysosomal pepstatin-insensitive protease) (LPIC) (Tripeptidyl aminopeptidase) (Tripeptidyl-peptidase I) (TPP-I)	TPP1 CLN2 GIG1 UNQ267/PRO304
TR11B_HUMAN	Tumor necrosis factor receptor superfamily member 11B (Osteoclastogenesis inhibitory factor) (Osteoprotegerin)	TNFRSF11B OCIF OPG
TRBM_HUMAN	Thrombomodulin (TM) (Fetomodulin) (CD antigen CD141)	THBD THRM
TRDN_HUMAN	Triadin	TRDN
TREM1_HUMAN	Triggering receptor expressed on myeloid cells 1 (TREM-1) (Triggering receptor expressed on monocytes 1) (CD antigen CD354)	TREM1
TRFE_HUMAN	Serotransferrin (Transferrin) (Beta-1 metal-binding globulin) (Siderophilin)	TF PRO1400
TRFL_HUMAN	Lactotransferrin (Lactoferrin) (EC 3.4.21.-) (Growth-inhibiting protein 12) (Talalactoferrin) [Cleaved into: Lactoferricin-H (Lfcin-H); Kaliocin-1; Lactoferroxin-A; Lactoferroxin-B; Lactoferroxin-C]	LTF GIG12 LF
TRFM_HUMAN	Melanotransferrin (Melanoma-associated antigen p97) (CD antigen CD228)	MFI2 MAP97
TRIL_HUMAN	TLR4 interactor with leucine rich repeats (Leucine-rich repeat-containing protein KIAA0644)	TRIL KIAA0644
TSN1_HUMAN	Tetraspanin-1 (Tspan-1) (Tetraspan NET-1) (Tetraspanin TM4-C)	TSPAN1
TSN13_HUMAN	Tetraspanin-13 (Tspan-13) (Tetraspan NET-6) (Transmembrane 4 superfamily member 13)	TSPAN13 NET6 TM4SF13 UNQ260/PRO296
TSN15_HUMAN	Tetraspanin-15 (Tspan-15) (Tetraspan NET-7) (Transmembrane 4 superfamily member 15)	TSPAN15 NET7 TM4SF15 UNQ677/PRO1311
TSN8_HUMAN	Tetraspanin-8 (Tspan-8) (Transmembrane 4 superfamily member 3) (Tumor-associated antigen CO-029)	TSPAN8 TM4SF3
TSP1_HUMAN	Thrombospondin-1	THBS1 TSP TSP1
TSP2_HUMAN	Thrombospondin-2	THBS2 TSP2
TSP3_HUMAN	Thrombospondin-3	THBS3 TSP3
TTC17_HUMAN	Tetratricopeptide repeat protein 17 (TPR repeat protein 17)	TTC17
TTYH3_HUMAN	Protein tweety homolog 3 (hTTY3)	TTYH3 KIAA1691
TUTLA_HUMAN	Protein turtle homolog A (Immunoglobulin superfamily member 9A) (IgSF9A)	IGSF9 IGSF9A KIAA1355 NRT1
TXD11_HUMAN	Thioredoxin domain-containing protein 11 (EF-hand-binding protein 1)	TXNDC11 EFP1
TXD15_HUMAN	Thioredoxin domain-containing protein 15	TXNDC15 C5orf14 UNQ335/PRO534
UGGG1_HUMAN	UDP-glucose:glycoprotein glucosyltransferase 1 (UGT1) (hUGT1) (EC 2.4.1.-) (UDP--Glc:glycoprotein glucosyltransferase) (UDP-glucose ceramide glucosyltransferase-like 1)	UGGT1 GT UGCGL1 UGGT UGT1 UGTR
UPAR_HUMAN	Urokinase plasminogen activator surface receptor (U-PAR) (uPAR) (Monocyte activation antigen Mo3) (CD antigen CD87)	PLAUR MO3 UPAR
UT1_HUMAN	Urea transporter 1 (Solute carrier family 14 member 1) (Urea transporter, erythrocyte)	SLC14A1 HUT11 JK RACH1 UT1 UTE
VAS1_HUMAN	V-type proton ATPase subunit S1 (V-ATPase subunit S1) (Protein XAP-3) (V-ATPase Ac45 subunit) (V-ATPase S1 accessory protein) (Vacuolar proton pump subunit S1)	ATP6AP1 ATP6IP1 ATP6S1 VATPS1 XAP3
VASN_HUMAN	Vasorin (Protein slit-like 2)	VASN SLITL2 UNQ314/PRO357/PRO1282
VCAM1_HUMAN	Vascular cell adhesion protein 1 (V-CAM 1) (VCAM-1) (INCAM-100) (CD antigen CD106)	VCAM1 L1CAM
VNN1_HUMAN	Pantetheinase (EC 3.5.1.92) (Pantetheine hydrolase) (Tiff66) (Vascular non-inflammatory molecule 1) (Vanin-1)	VNN1
VPP2_HUMAN	V-type proton ATPase 116 kDa subunit a isoform 2 (V-ATPase 116 kDa isoform a2) (Lysosomal H(+)-transporting ATPase V0 subunit a2) (TJ6) (Vacuolar proton translocating ATPase 116 kDa subunit a isoform 2)	ATP6V0A2
VTCN1_HUMAN	V-set domain-containing T-cell activation inhibitor 1 (B7h.5) (Immune costimulatory protein B7-H4) (Protein B7S1) (T-cell costimulatory molecule B7x)	VTCN1 B7H4 UNQ659/PRO1291
VTDB_HUMAN	Vitamin D-binding protein (DBP) (VDB) (Gc-globulin) (Group-specific component)	GC
VTNC_HUMAN	Vitronectin (VN) (S-protein) (Serum-spreading factor) (V75) [Cleaved into: Vitronectin V65 subunit; Vitronectin V10 subunit; Somatomedin-B]	VTN
VWF_HUMAN	von Willebrand factor (vWF) [Cleaved into: von Willebrand antigen 2 (von Willebrand antigen II)]	VWF F8VWF
WFDC2_HUMAN	WAP four-disulfide core domain protein 2 (Epididymal secretory protein E4) (Major epididymis-specific protein E4) (Putative protease inhibitor WAP5)	WFDC2 HE4 WAP5
WISP1_HUMAN	WNT1-inducible-signaling pathway protein 1 (WISP-1) (CCN family member 4) (Wnt-1-induced secreted protein)	WISP1 CCN4
ZA2G_HUMAN	Zinc-alpha-2-glycoprotein (Zn-alpha-2-GP) (Zn-alpha-2-glycoprotein)	AZGP1 ZAG ZNGP1
ZN608_HUMAN	Zinc finger protein 608 (Renal carcinoma antigen NY-REN-36)	ZNF608 KIAA1281
ZN844_HUMAN	Zinc finger protein 844	ZNF844
ZPI_HUMAN	Protein Z-dependent protease inhibitor (PZ-dependent protease inhibitor) (PZI) (Serpin A10)	SERPINA10 ZPI UNQ707/PRO1358

## Sheet: Quantified proteins raw
Gene	Uniprot ID	Biol_group	Sample	Area	Area Normalized (Central-tendency normalization to a common mean)
HLA-DMB	DMB_HUMAN	ERnegDRneg	31	1100000	1.64547e+06
HLA-DMB	DMB_HUMAN	ERnegDRpos	78	2300000	3.62403e+06
HLA-DMB	DMB_HUMAN	ERnegDRpos	19	3700000	3.97498e+06
HLA-DMB	DMB_HUMAN	ERposDRpos	79	3700000	9.10932e+06
HLA-DRA	DRA_HUMAN	ERposDRneg	67	95000	1.12266e+06
HLA-DRA	DRA_HUMAN	ERnegDRpos	76	130000	1229020
HLA-DRA	DRA_HUMAN	ERposDRpos	40	430000	423460
HLA-DRA	DRA_HUMAN	ERposDRneg	41	1500000	1.47719e+06
HLA-DRA	DRA_HUMAN	ERposDRpos	77	3000000	2.21578e+07
HLA-DRA	DRA_HUMAN	ERposDRpos	44	4600000	2.13178e+06
HLA-DRA	DRA_HUMAN	ERnegDRneg	10	6500000	4.51846e+06
HLA-DRA	DRA_HUMAN	ERposDRpos	17	7900000	8.48711e+06
HLA-DRA	DRA_HUMAN	ERposDRneg	15	11000000	9.99942e+06
HLA-DRA	DRA_HUMAN	ERposDRpos	45	13000000	1.28023e+07
HLA-DRA	DRA_HUMAN	ERnegDRpos	21	14000000	1.88006e+07
HLA-DRA	DRA_HUMAN	ERnegDRpos	80	15000000	1.8088e+07
HLA-DRA	DRA_HUMAN	ERposDRneg	34	16000000	1.71891e+07
HLA-DRA	DRA_HUMAN	ERposDRpos	26	18000000	1.63627e+07
HLA-DRA	DRA_HUMAN	ERnegDRneg	63	22000000	17930000
HLA-DRA	DRA_HUMAN	ERposDRpos	27	23000000	2.77349e+07
HLA-DRA	DRA_HUMAN	ERposDRneg	58	26000000	6.27051e+07
HLA-DRA	DRA_HUMAN	ERnegDRpos	9	30000000	35452500
HLA-DRA	DRA_HUMAN	ERnegDRneg	12	31000000	47270000
HLA-DRA	DRA_HUMAN	ERposDRneg	6	31000000	4.02574e+07
HLA-DRA	DRA_HUMAN	ERnegDRpos	13	31000000	3.33039e+07
HLA-DRA	DRA_HUMAN	ERnegDRpos	74	33000000	2.88872e+07
HLA-DRA	DRA_HUMAN	ERposDRpos	65	35000000	2.17691e+07
HLA-DRA	DRA_HUMAN	ERposDRneg	66	35000000	5.99438e+07
HLA-DRA	DRA_HUMAN	ERnegDRpos	50	36000000	3.03879e+07
HLA-DRA	DRA_HUMAN	ERposDRneg	47	45000000	4.83443e+07
HLA-DRA	DRA_HUMAN	ERnegDRneg	18	48000000	5.7297e+07
HLA-DRA	DRA_HUMAN	ERposDRpos	29	49000000	5.79058e+07
HLA-DRA	DRA_HUMAN	ERnegDRpos	38	49000000	3.86038e+07
HLA-DRA	DRA_HUMAN	ERnegDRpos	2	53000000	6.52424e+07
HLA-DRA	DRA_HUMAN	ERnegDRpos	8	57000000	5.18152e+07
HLA-DRA	DRA_HUMAN	ERposDRneg	55	58000000	5.27242e+07
HLA-DRA	DRA_HUMAN	ERposDRpos	42	59000000	55778600
HLA-DRA	DRA_HUMAN	ERposDRneg	24	62000000	4.88457e+07
HLA-DRA	DRA_HUMAN	ERnegDRneg	32	62000000	8.51959e+07
HLA-DRA	DRA_HUMAN	ERposDRneg	52	63000000	8.18135e+07
HLA-DRA	DRA_HUMAN	ERnegDRneg	11	63000000	5.72694e+07
HLA-DRA	DRA_HUMAN	ERposDRpos	3	65000000	59087500
HLA-DRA	DRA_HUMAN	ERnegDRneg	73	66000000	47270000
HLA-DRA	DRA_HUMAN	ERnegDRpos	19	66000000	70905000
HLA-DRA	DRA_HUMAN	ERnegDRneg	4	69000000	67950625
HLA-DRA	DRA_HUMAN	ERnegDRpos	25	70000000	9.84792e+07
HLA-DRA	DRA_HUMAN	ERnegDRneg	1	71000000	8.5182e+07
HLA-DRA	DRA_HUMAN	ERnegDRneg	22	83000000	8.91684e+07
HLA-DRA	DRA_HUMAN	ERnegDRneg	54	84000000	7.63592e+07
HLA-DRA	DRA_HUMAN	ERnegDRpos	7	84000000	5.83924e+07
HLA-DRA	DRA_HUMAN	ERposDRneg	14	91000000	9.7763e+07
HLA-DRA	DRA_HUMAN	ERposDRneg	30	97000000	9.55248e+07
HLA-DRA	DRA_HUMAN	ERnegDRpos	49	110000000	1.41296e+08
HLA-DRA	DRA_HUMAN	ERposDRneg	33	110000000	9.28518e+07
HLA-DRA	DRA_HUMAN	ERposDRneg	36	110000000	9.28518e+07
HLA-DRA	DRA_HUMAN	ERnegDRpos	46	110000000	44825000
HLA-DRA	DRA_HUMAN	ERnegDRneg	20	130000000	9.03691e+07
HLA-DRA	DRA_HUMAN	ERposDRpos	37	130000000	153627500
HLA-DRA	DRA_HUMAN	ERposDRpos	70	130000000	153627500
HLA-DRA	DRA_HUMAN	ERnegDRpos	75	170000000	1.54537e+08
HLA-DRA	DRA_HUMAN	ERnegDRneg	61	180000000	177262500
HLA-DRA	DRA_HUMAN	ERposDRpos	59	210000000	165445000
HLA-DRA	DRA_HUMAN	ERnegDRneg	48	220000000	3.00561e+08
HLA-DRA	DRA_HUMAN	ERposDRpos	53	220000000	103994000
HLA-DRA	DRA_HUMAN	ERposDRpos	71	240000000	3.15133e+08
HLA-DRA	DRA_HUMAN	ERnegDRneg	56	250000000	1.96958e+08
HLA-DRA	DRA_HUMAN	ERposDRneg	28	260000000	4.42094e+08
HLA-DRA	DRA_HUMAN	ERnegDRpos	5	260000000	2.56046e+08
HLA-DRA	DRA_HUMAN	ERposDRneg	64	260000000	3.93917e+08
HLA-DRA	DRA_HUMAN	ERposDRpos	57	270000000	2.27909e+08
HLA-DRA	DRA_HUMAN	ERposDRpos	35	300000000	4.14649e+08
HLA-DRA	DRA_HUMAN	ERnegDRpos	62	300000000	4.85651e+08
HLA-DRA	DRA_HUMAN	ERnegDRneg	31	340000000	5.08601e+08
HLA-DRA	DRA_HUMAN	ERnegDRneg	69	370000000	2.91498e+08
HLA-DRA	DRA_HUMAN	ERnegDRpos	78	380000000	5.98753e+08
HLA-DRA	DRA_HUMAN	ERnegDRneg	51	560000000	472700000
HLA-DRA	DRA_HUMAN	ERposDRpos	43	880000000	4.33308e+08
HLA-DRA	DRA_HUMAN	ERposDRpos	60	900000000	8.18135e+08
HLA-DRA	DRA_HUMAN	ERposDRpos	79	1400000000	3.44677e+09
HLA-DRA	DRA_HUMAN	ERposDRneg	68	1700000000	1.05736e+09
HLA-DRA	DRA_HUMAN	ERnegDRneg	72	1700000000	2.33602e+09
SLC3A2	4F2_HUMAN	ERnegDRneg	63	500000	407500
SLC3A2	4F2_HUMAN	ERposDRneg	33	930000	785020
SLC3A2	4F2_HUMAN	ERnegDRneg	61	1000000	984792
SLC3A2	4F2_HUMAN	ERposDRpos	45	1100000	1.08327e+06
SLC3A2	4F2_HUMAN	ERposDRpos	59	2300000	1.81202e+06
SLC3A2	4F2_HUMAN	ERposDRneg	66	2300000	3.93917e+06
SLC3A2	4F2_HUMAN	ERnegDRpos	46	2400000	978000
SLC3A2	4F2_HUMAN	ERposDRpos	42	3300000	3119820
SLC3A2	4F2_HUMAN	ERnegDRneg	73	3700000	2.64998e+06
SLC3A2	4F2_HUMAN	ERposDRpos	70	3800000	4490650
SLC3A2	4F2_HUMAN	ERposDRpos	53	4000000	1890800
SLC3A2	4F2_HUMAN	ERnegDRpos	74	4500000	3.93917e+06
SLC3A2	4F2_HUMAN	ERposDRpos	65	4600000	2.86108e+06
SLC3A2	4F2_HUMAN	ERposDRneg	55	4900000	4.45429e+06
SLC3A2	4F2_HUMAN	ERnegDRpos	49	5100000	6.55101e+06
SLC3A2	4F2_HUMAN	ERnegDRneg	69	5200000	4.09673e+06
SLC3A2	4F2_HUMAN	ERposDRneg	52	5600000	7.27231e+06
SLC3A2	4F2_HUMAN	ERnegDRpos	62	6400000	1.03605e+07
SLC3A2	4F2_HUMAN	ERnegDRneg	56	7700000	6.06632e+06
SLC3A2	4F2_HUMAN	ERnegDRneg	48	11000000	1.5028e+07
SLC3A2	4F2_HUMAN	ERnegDRpos	78	13000000	2.04837e+07
SLC3A2	4F2_HUMAN	ERnegDRneg	54	13000000	11817500
SLC3A2	4F2_HUMAN	ERnegDRneg	51	14000000	11817500
SLC3A2	4F2_HUMAN	ERposDRpos	71	19000000	2.49481e+07
SLC3A2	4F2_HUMAN	ERnegDRpos	75	19000000	1.72717e+07
SLC3A2	4F2_HUMAN	ERposDRneg	47	28000000	3.00809e+07
SLC3A2	4F2_HUMAN	ERposDRpos	57	36000000	3.03879e+07
SLC3A2	4F2_HUMAN	ERposDRneg	64	51000000	7.72683e+07
SLC3A2	4F2_HUMAN	ERposDRpos	79	54000000	132946875
SLC3A2	4F2_HUMAN	ERposDRpos	60	58000000	5.27242e+07
SLC3A2	4F2_HUMAN	ERposDRneg	68	60000000	3.73184e+07
SLC3A2	4F2_HUMAN	ERnegDRneg	72	110000000	1.51154e+08
SLC3A2	4F2_HUMAN	ERposDRpos	43	160000000	7.87833e+07
NT5E	5NTD_HUMAN	ERnegDRpos	9	1200000	1418100
NT5E	5NTD_HUMAN	ERnegDRpos	75	1500000	1.36356e+06
NT5E	5NTD_HUMAN	ERnegDRneg	51	10000000	8.44107e+06
ORM1	A1AG1_HUMAN	ERnegDRpos	76	1900000	17962600
ORM1	A1AG1_HUMAN	ERposDRneg	67	8500000	100448750
ORM1	A1AG1_HUMAN	ERnegDRneg	1	11000000	1.31972e+07
ORM1	A1AG1_HUMAN	ERposDRneg	36	39000000	3.29202e+07
ORM1	A1AG1_HUMAN	ERposDRneg	52	120000000	1.55835e+08
ORM1	A1AG1_HUMAN	ERposDRpos	70	190000000	224532500
ORM1	A1AG1_HUMAN	ERnegDRneg	4	300000000	295437500
ORM1	A1AG1_HUMAN	ERposDRneg	28	310000000	5.27112e+08
ORM1	A1AG1_HUMAN	ERposDRpos	45	350000000	3.44677e+08
ORM1	A1AG1_HUMAN	ERnegDRpos	78	430000000	6.77537e+08
ORM1	A1AG1_HUMAN	ERnegDRneg	72	450000000	6.18358e+08
ORM1	A1AG1_HUMAN	ERnegDRpos	74	490000000	4.28931e+08
ORM1	A1AG1_HUMAN	ERposDRneg	58	490000000	1181750000
ORM1	A1AG1_HUMAN	ERnegDRpos	2	510000000	6.27805e+08
ORM1	A1AG1_HUMAN	ERposDRpos	27	520000000	6.27051e+08
ORM1	A1AG1_HUMAN	ERnegDRpos	25	520000000	7.3156e+08
ORM1	A1AG1_HUMAN	ERposDRneg	34	550000000	590875000
ORM1	A1AG1_HUMAN	ERnegDRneg	73	560000000	4.01079e+08
ORM1	A1AG1_HUMAN	ERnegDRpos	19	580000000	6.23105e+08
ORM1	A1AG1_HUMAN	ERposDRneg	33	580000000	4.89582e+08
ORM1	A1AG1_HUMAN	ERposDRpos	79	640000000	1.57567e+09
ORM1	A1AG1_HUMAN	ERnegDRpos	80	670000000	8.07931e+08
ORM1	A1AG1_HUMAN	ERposDRpos	42	670000000	633418000
ORM1	A1AG1_HUMAN	ERnegDRneg	51	670000000	5.65552e+08
ORM1	A1AG1_HUMAN	ERposDRpos	57	680000000	5.73993e+08
ORM1	A1AG1_HUMAN	ERnegDRneg	22	690000000	7.4128e+08
ORM1	A1AG1_HUMAN	ERposDRneg	66	700000000	1.19888e+09
ORM1	A1AG1_HUMAN	ERnegDRneg	48	780000000	1.06562e+09
ORM1	A1AG1_HUMAN	ERnegDRneg	63	780000000	635700000
ORM1	A1AG1_HUMAN	ERposDRneg	64	800000000	1.21205e+09
ORM1	A1AG1_HUMAN	ERnegDRpos	38	800000000	6.30267e+08
ORM1	A1AG1_HUMAN	ERposDRpos	71	810000000	1.06358e+09
ORM1	A1AG1_HUMAN	ERposDRpos	65	810000000	5.03799e+08
ORM1	A1AG1_HUMAN	ERnegDRpos	46	810000000	330075000
ORM1	A1AG1_HUMAN	ERnegDRpos	49	810000000	1.04045e+09
ORM1	A1AG1_HUMAN	ERposDRpos	60	840000000	7.63592e+08
ORM1	A1AG1_HUMAN	ERnegDRneg	31	890000000	1.33134e+09
ORM1	A1AG1_HUMAN	ERposDRpos	59	890000000	7.01172e+08
ORM1	A1AG1_HUMAN	ERposDRneg	14	920000000	9.88373e+08
ORM1	A1AG1_HUMAN	ERnegDRpos	75	940000000	8.54496e+08
ORM1	A1AG1_HUMAN	ERnegDRneg	12	960000000	1.46385e+09
ORM1	A1AG1_HUMAN	ERnegDRpos	16	960000000	6.67341e+08
ORM1	A1AG1_HUMAN	ERnegDRneg	61	970000000	9.55248e+08
ORM1	A1AG1_HUMAN	ERnegDRpos	62	970000000	1.57027e+09
ORM1	A1AG1_HUMAN	ERposDRpos	26	1100000000	9.99942e+08
ORM1	A1AG1_HUMAN	ERposDRpos	3	1100000000	9.99942e+08
ORM1	A1AG1_HUMAN	ERnegDRneg	23	1100000000	1.08327e+09
ORM1	A1AG1_HUMAN	ERposDRpos	37	1200000000	1418100000
ORM1	A1AG1_HUMAN	ERposDRpos	35	1200000000	1.6586e+09
ORM1	A1AG1_HUMAN	ERnegDRneg	69	1200000000	9.454e+08
ORM1	A1AG1_HUMAN	ERnegDRpos	50	1200000000	1.01293e+09
ORM1	A1AG1_HUMAN	ERnegDRneg	18	1300000000	1.55179e+09
ORM1	A1AG1_HUMAN	ERposDRneg	47	1300000000	1.39661e+09
ORM1	A1AG1_HUMAN	ERnegDRpos	8	1300000000	1181750000
ORM1	A1AG1_HUMAN	ERposDRneg	68	1300000000	8.08566e+08
ORM1	A1AG1_HUMAN	ERnegDRpos	21	1400000000	1.88006e+09
ORM1	A1AG1_HUMAN	ERnegDRpos	5	1500000000	1477187500
ORM1	A1AG1_HUMAN	ERposDRneg	15	1500000000	1.36356e+09
ORM1	A1AG1_HUMAN	ERposDRpos	17	1600000000	1.71891e+09
ORM1	A1AG1_HUMAN	ERposDRpos	53	1600000000	756320000
ORM1	A1AG1_HUMAN	ERposDRpos	29	1700000000	2.00898e+09
ORM1	A1AG1_HUMAN	ERnegDRneg	54	1700000000	1.54537e+09
ORM1	A1AG1_HUMAN	ERposDRneg	41	1700000000	1.67415e+09
ORM1	A1AG1_HUMAN	ERnegDRneg	32	1700000000	2.33602e+09
ORM1	A1AG1_HUMAN	ERnegDRpos	9	1800000000	2.12715e+09
ORM1	A1AG1_HUMAN	ERposDRpos	43	1900000000	9.35552e+08
ORM1	A1AG1_HUMAN	ERposDRneg	6	1900000000	2.46739e+09
ORM1	A1AG1_HUMAN	ERnegDRpos	13	1900000000	2.0412e+09
ORM1	A1AG1_HUMAN	ERnegDRneg	11	2000000000	1.81808e+09
ORM1	A1AG1_HUMAN	ERposDRneg	24	2100000000	1654450000
ORM1	A1AG1_HUMAN	ERnegDRpos	7	2100000000	1.45981e+09
ORM1	A1AG1_HUMAN	ERnegDRneg	10	2100000000	1.45981e+09
ORM1	A1AG1_HUMAN	ERnegDRneg	56	2200000000	1.73323e+09
ORM1	A1AG1_HUMAN	ERnegDRneg	20	2400000000	1.66835e+09
ORM1	A1AG1_HUMAN	ERposDRpos	44	3000000000	1.39029e+09
ORM1	A1AG1_HUMAN	ERposDRneg	30	3200000000	3.15133e+09
ORM1	A1AG1_HUMAN	ERposDRneg	55	3300000000	2.99983e+09
ORM1	A1AG1_HUMAN	ERposDRpos	40	3300000000	3249812500
ORM2	A1AG2_HUMAN	ERposDRpos	70	38000000	44906500
ORM2	A1AG2_HUMAN	ERnegDRpos	78	97000000	1.5284e+08
ORM2	A1AG2_HUMAN	ERnegDRneg	63	120000000	97800000
ORM2	A1AG2_HUMAN	ERnegDRneg	12	130000000	1.98229e+08
ORM2	A1AG2_HUMAN	ERnegDRpos	25	130000000	1.8289e+08
ORM2	A1AG2_HUMAN	ERposDRpos	53	150000000	70905000
ORM2	A1AG2_HUMAN	ERnegDRpos	46	160000000	6.52e+07
ORM2	A1AG2_HUMAN	ERposDRpos	71	190000000	2.49481e+08
ORM2	A1AG2_HUMAN	ERnegDRneg	72	190000000	2.61084e+08
ORM2	A1AG2_HUMAN	ERposDRneg	64	200000000	3.03013e+08
ORM2	A1AG2_HUMAN	ERnegDRneg	48	200000000	2.73237e+08
ORM2	A1AG2_HUMAN	ERposDRpos	79	210000000	517015625
ORM2	A1AG2_HUMAN	ERposDRpos	37	210000000	2.48168e+08
ORM2	A1AG2_HUMAN	ERposDRpos	65	220000000	1.36834e+08
ORM2	A1AG2_HUMAN	ERnegDRpos	38	220000000	1.73323e+08
ORM2	A1AG2_HUMAN	ERnegDRneg	69	230000000	1.81202e+08
ORM2	A1AG2_HUMAN	ERnegDRneg	31	270000000	4.03889e+08
ORM2	A1AG2_HUMAN	ERposDRpos	42	280000000	264712000
ORM2	A1AG2_HUMAN	ERnegDRneg	11	280000000	2.54531e+08
ORM2	A1AG2_HUMAN	ERnegDRneg	61	290000000	2.8559e+08
ORM2	A1AG2_HUMAN	ERposDRpos	27	360000000	4.34112e+08
ORM2	A1AG2_HUMAN	ERposDRpos	26	370000000	3.36344e+08
ORM2	A1AG2_HUMAN	ERposDRneg	68	390000000	2.4257e+08
ORM2	A1AG2_HUMAN	ERnegDRneg	18	410000000	4.89412e+08
ORM2	A1AG2_HUMAN	ERnegDRneg	23	460000000	4.53004e+08
ORM2	A1AG2_HUMAN	ERposDRneg	30	470000000	4.62852e+08
ORM2	A1AG2_HUMAN	ERnegDRpos	50	480000000	4.05171e+08
ORM2	A1AG2_HUMAN	ERposDRneg	47	480000000	5.15673e+08
ORM2	A1AG2_HUMAN	ERposDRneg	41	490000000	4.82548e+08
ORM2	A1AG2_HUMAN	ERnegDRneg	10	490000000	3.40622e+08
ORM2	A1AG2_HUMAN	ERnegDRpos	9	490000000	579057500
ORM2	A1AG2_HUMAN	ERnegDRpos	21	500000000	6.71449e+08
ORM2	A1AG2_HUMAN	ERnegDRneg	32	500000000	6.87064e+08
ORM2	A1AG2_HUMAN	ERposDRneg	15	520000000	472700000
ORM2	A1AG2_HUMAN	ERposDRpos	17	530000000	5.69389e+08
ORM2	A1AG2_HUMAN	ERnegDRpos	13	570000000	6.12361e+08
ORM2	A1AG2_HUMAN	ERposDRpos	43	570000000	280665625
ORM2	A1AG2_HUMAN	ERposDRneg	6	670000000	8.7008e+08
ORM2	A1AG2_HUMAN	ERposDRneg	24	700000000	5.51483e+08
ORM2	A1AG2_HUMAN	ERnegDRneg	56	840000000	661780000
ORM2	A1AG2_HUMAN	ERposDRneg	55	900000000	8.18135e+08
ORM2	A1AG2_HUMAN	ERposDRpos	40	960000000	945400000
ORM2	A1AG2_HUMAN	ERposDRpos	44	1200000000	5.56118e+08
SERPINA1	A1AT_HUMAN	ERnegDRpos	25	2100000	2954375
SERPINA1	A1AT_HUMAN	ERnegDRpos	76	8100000	76577400
SERPINA1	A1AT_HUMAN	ERposDRneg	67	41000000	4.84518e+08
SERPINA1	A1AT_HUMAN	ERposDRpos	17	91000000	9.7763e+07
SERPINA1	A1AT_HUMAN	ERnegDRpos	21	94000000	1.26232e+08
SERPINA1	A1AT_HUMAN	ERposDRpos	77	190000000	1403328125
SERPINA1	A1AT_HUMAN	ERposDRneg	28	460000000	7.82165e+08
SERPINA1	A1AT_HUMAN	ERposDRpos	27	470000000	5.66758e+08
SERPINA1	A1AT_HUMAN	ERposDRneg	33	500000000	4.22054e+08
SERPINA1	A1AT_HUMAN	ERnegDRpos	38	600000000	4.727e+08
SERPINA1	A1AT_HUMAN	ERposDRpos	29	620000000	732685000
SERPINA1	A1AT_HUMAN	ERnegDRneg	32	780000000	1.07182e+09
SERPINA1	A1AT_HUMAN	ERnegDRneg	11	880000000	7.99954e+08
SERPINA1	A1AT_HUMAN	ERposDRneg	58	880000000	2.12233e+09
SERPINA1	A1AT_HUMAN	ERposDRneg	34	920000000	9.88373e+08
SERPINA1	A1AT_HUMAN	ERnegDRneg	23	930000000	915856250
SERPINA1	A1AT_HUMAN	ERnegDRneg	31	980000000	1.46597e+09
SERPINA1	A1AT_HUMAN	ERnegDRneg	1	1100000000	1.31972e+09
SERPINA1	A1AT_HUMAN	ERnegDRpos	19	1100000000	1181750000
SERPINA1	A1AT_HUMAN	ERposDRneg	41	1100000000	1.08327e+09
SERPINA1	A1AT_HUMAN	ERposDRpos	40	1200000000	1181750000
SERPINA1	A1AT_HUMAN	ERposDRpos	79	1200000000	2954375000
SERPINA1	A1AT_HUMAN	ERposDRneg	36	1200000000	1.01293e+09
SERPINA1	A1AT_HUMAN	ERposDRneg	24	1200000000	9.454e+08
SERPINA1	A1AT_HUMAN	ERnegDRpos	13	1200000000	1.28918e+09
SERPINA1	A1AT_HUMAN	ERnegDRneg	20	1200000000	8.34176e+08
SERPINA1	A1AT_HUMAN	ERnegDRneg	22	1200000000	1.28918e+09
SERPINA1	A1AT_HUMAN	ERposDRpos	60	1200000000	1.09085e+09
SERPINA1	A1AT_HUMAN	ERnegDRpos	16	1300000000	9.03691e+08
SERPINA1	A1AT_HUMAN	ERnegDRneg	72	1300000000	1.78637e+09
SERPINA1	A1AT_HUMAN	ERnegDRneg	48	1400000000	1.91266e+09
SERPINA1	A1AT_HUMAN	ERposDRneg	30	1400000000	1.37871e+09
SERPINA1	A1AT_HUMAN	ERnegDRpos	78	1400000000	2.20593e+09
SERPINA1	A1AT_HUMAN	ERposDRpos	35	1400000000	1.93503e+09
SERPINA1	A1AT_HUMAN	ERnegDRneg	18	1400000000	1.67116e+09
SERPINA1	A1AT_HUMAN	ERposDRpos	70	1400000000	1654450000
SERPINA1	A1AT_HUMAN	ERposDRpos	26	1500000000	1.36356e+09
SERPINA1	A1AT_HUMAN	ERposDRneg	14	1500000000	1.61148e+09
SERPINA1	A1AT_HUMAN	ERnegDRneg	12	1700000000	2.59223e+09
SERPINA1	A1AT_HUMAN	ERnegDRpos	75	1700000000	1.54537e+09
SERPINA1	A1AT_HUMAN	ERnegDRpos	2	1800000000	2215781250
SERPINA1	A1AT_HUMAN	ERposDRneg	64	1800000000	2.72712e+09
SERPINA1	A1AT_HUMAN	ERposDRneg	66	1800000000	3.08283e+09
SERPINA1	A1AT_HUMAN	ERnegDRpos	8	1800000000	1.63627e+09
SERPINA1	A1AT_HUMAN	ERnegDRneg	10	1900000000	1.32078e+09
SERPINA1	A1AT_HUMAN	ERposDRpos	3	2000000000	1.81808e+09
SERPINA1	A1AT_HUMAN	ERposDRpos	37	2100000000	2481675000
SERPINA1	A1AT_HUMAN	ERposDRpos	71	2100000000	2.75742e+09
SERPINA1	A1AT_HUMAN	ERposDRneg	47	2100000000	2.25607e+09
SERPINA1	A1AT_HUMAN	ERposDRneg	15	2200000000	1.99988e+09
SERPINA1	A1AT_HUMAN	ERposDRpos	42	2200000000	2079880000
SERPINA1	A1AT_HUMAN	ERnegDRpos	46	2400000000	9.78e+08
SERPINA1	A1AT_HUMAN	ERnegDRneg	73	2400000000	1.71891e+09
SERPINA1	A1AT_HUMAN	ERnegDRpos	5	2400000000	2363500000
SERPINA1	A1AT_HUMAN	ERposDRpos	45	2500000000	2.46198e+09
SERPINA1	A1AT_HUMAN	ERnegDRneg	69	2700000000	2.12715e+09
SERPINA1	A1AT_HUMAN	ERnegDRpos	80	2700000000	3.25584e+09
SERPINA1	A1AT_HUMAN	ERnegDRpos	49	2700000000	3.46818e+09
SERPINA1	A1AT_HUMAN	ERposDRneg	52	2700000000	3.50629e+09
SERPINA1	A1AT_HUMAN	ERnegDRneg	63	2800000000	2282000000
SERPINA1	A1AT_HUMAN	ERnegDRneg	4	2900000000	2.8559e+09
SERPINA1	A1AT_HUMAN	ERnegDRneg	61	2900000000	2.8559e+09
SERPINA1	A1AT_HUMAN	ERposDRneg	6	2900000000	3.76602e+09
SERPINA1	A1AT_HUMAN	ERnegDRpos	62	3000000000	4.85651e+09
SERPINA1	A1AT_HUMAN	ERnegDRneg	56	3000000000	2363500000
SERPINA1	A1AT_HUMAN	ERnegDRpos	50	3000000000	2.53232e+09
SERPINA1	A1AT_HUMAN	ERposDRneg	68	3100000000	1.92812e+09
SERPINA1	A1AT_HUMAN	ERnegDRneg	51	3200000000	2.70114e+09
SERPINA1	A1AT_HUMAN	ERnegDRpos	9	3300000000	3.89978e+09
SERPINA1	A1AT_HUMAN	ERnegDRneg	54	3400000000	3.09073e+09
SERPINA1	A1AT_HUMAN	ERposDRpos	57	3700000000	3.1232e+09
SERPINA1	A1AT_HUMAN	ERnegDRpos	7	4500000000	3.12816e+09
SERPINA1	A1AT_HUMAN	ERposDRpos	65	4600000000	2.86108e+09
SERPINA1	A1AT_HUMAN	ERposDRpos	59	5000000000	3.93917e+09
SERPINA1	A1AT_HUMAN	ERposDRneg	55	5000000000	4.54519e+09
SERPINA1	A1AT_HUMAN	ERposDRpos	43	5600000000	2.75742e+09
SERPINA1	A1AT_HUMAN	ERposDRpos	53	5800000000	2741660000
SERPINA1	A1AT_HUMAN	ERnegDRpos	74	7300000000	6.3902e+09
SERPINA1	A1AT_HUMAN	ERposDRpos	44	7500000000	3.47574e+09
A1BG	A1BG_HUMAN	ERnegDRneg	1	4600000	5.51883e+06
A1BG	A1BG_HUMAN	ERnegDRpos	25	13000000	1.8289e+07
A1BG	A1BG_HUMAN	ERnegDRpos	78	13000000	2.04837e+07
A1BG	A1BG_HUMAN	ERposDRneg	58	19000000	4.5823e+07
A1BG	A1BG_HUMAN	ERnegDRpos	75	21000000	1.90898e+07
A1BG	A1BG_HUMAN	ERposDRpos	37	23000000	27180250
A1BG	A1BG_HUMAN	ERposDRneg	41	24000000	23635000
A1BG	A1BG_HUMAN	ERposDRpos	35	32000000	4.42292e+07
A1BG	A1BG_HUMAN	ERnegDRpos	38	33000000	25998500
A1BG	A1BG_HUMAN	ERposDRneg	33	33000000	2.78555e+07
A1BG	A1BG_HUMAN	ERposDRneg	28	36000000	6.12129e+07
A1BG	A1BG_HUMAN	ERnegDRneg	4	36000000	35452500
A1BG	A1BG_HUMAN	ERnegDRneg	32	42000000	5.77134e+07
A1BG	A1BG_HUMAN	ERnegDRneg	72	43000000	59087500
A1BG	A1BG_HUMAN	ERposDRneg	15	47000000	4.27248e+07
A1BG	A1BG_HUMAN	ERnegDRneg	48	54000000	7.3774e+07
A1BG	A1BG_HUMAN	ERnegDRneg	31	55000000	8.22737e+07
A1BG	A1BG_HUMAN	ERposDRneg	52	58000000	7.53203e+07
A1BG	A1BG_HUMAN	ERposDRneg	34	62000000	6.66077e+07
A1BG	A1BG_HUMAN	ERposDRneg	30	65000000	6.40115e+07
A1BG	A1BG_HUMAN	ERposDRpos	45	71000000	6.99202e+07
A1BG	A1BG_HUMAN	ERnegDRpos	80	76000000	9.16459e+07
A1BG	A1BG_HUMAN	ERnegDRneg	73	85000000	6.0878e+07
A1BG	A1BG_HUMAN	ERnegDRpos	49	87000000	1.11752e+08
A1BG	A1BG_HUMAN	ERposDRneg	14	88000000	9.454e+07
A1BG	A1BG_HUMAN	ERposDRpos	57	92000000	7.76579e+07
A1BG	A1BG_HUMAN	ERnegDRpos	2	98000000	1.20637e+08
A1BG	A1BG_HUMAN	ERposDRpos	40	100000000	9.84792e+07
A1BG	A1BG_HUMAN	ERposDRpos	71	100000000	1.31306e+08
A1BG	A1BG_HUMAN	ERposDRpos	27	100000000	1.20587e+08
A1BG	A1BG_HUMAN	ERposDRpos	79	110000000	2.70818e+08
A1BG	A1BG_HUMAN	ERnegDRpos	74	110000000	9.62907e+07
A1BG	A1BG_HUMAN	ERposDRpos	70	110000000	1.29993e+08
A1BG	A1BG_HUMAN	ERnegDRneg	22	110000000	1.18175e+08
A1BG	A1BG_HUMAN	ERposDRpos	60	120000000	1.09085e+08
A1BG	A1BG_HUMAN	ERposDRneg	66	120000000	2.05522e+08
A1BG	A1BG_HUMAN	ERnegDRneg	51	120000000	1.01293e+08
A1BG	A1BG_HUMAN	ERposDRpos	29	120000000	141810000
A1BG	A1BG_HUMAN	ERposDRneg	36	130000000	1.09734e+08
A1BG	A1BG_HUMAN	ERnegDRneg	12	130000000	1.98229e+08
A1BG	A1BG_HUMAN	ERnegDRpos	19	140000000	1.50405e+08
A1BG	A1BG_HUMAN	ERposDRpos	42	160000000	151264000
A1BG	A1BG_HUMAN	ERposDRpos	26	160000000	1.45446e+08
A1BG	A1BG_HUMAN	ERposDRpos	65	160000000	9.95158e+07
A1BG	A1BG_HUMAN	ERposDRneg	64	180000000	2.72712e+08
A1BG	A1BG_HUMAN	ERnegDRneg	20	180000000	1.25126e+08
A1BG	A1BG_HUMAN	ERnegDRneg	63	180000000	146700000
A1BG	A1BG_HUMAN	ERnegDRpos	7	200000000	1.39029e+08
A1BG	A1BG_HUMAN	ERposDRpos	3	200000000	1.81808e+08
A1BG	A1BG_HUMAN	ERnegDRneg	61	210000000	206806250
A1BG	A1BG_HUMAN	ERnegDRneg	54	210000000	1.90898e+08
A1BG	A1BG_HUMAN	ERnegDRpos	62	210000000	3.39955e+08
A1BG	A1BG_HUMAN	ERnegDRneg	18	230000000	2.74548e+08
A1BG	A1BG_HUMAN	ERnegDRneg	11	240000000	2.18169e+08
A1BG	A1BG_HUMAN	ERnegDRneg	23	240000000	236350000
A1BG	A1BG_HUMAN	ERposDRneg	47	260000000	2.79323e+08
A1BG	A1BG_HUMAN	ERnegDRpos	8	310000000	2.81802e+08
A1BG	A1BG_HUMAN	ERnegDRneg	69	320000000	2.52107e+08
A1BG	A1BG_HUMAN	ERnegDRpos	16	320000000	2.22447e+08
A1BG	A1BG_HUMAN	ERposDRneg	68	340000000	2.11471e+08
A1BG	A1BG_HUMAN	ERposDRpos	17	370000000	3.97498e+08
A1BG	A1BG_HUMAN	ERposDRneg	55	370000000	3.36344e+08
A1BG	A1BG_HUMAN	ERnegDRpos	21	390000000	5.2373e+08
A1BG	A1BG_HUMAN	ERposDRpos	59	400000000	3.15133e+08
A1BG	A1BG_HUMAN	ERnegDRneg	56	420000000	330890000
A1BG	A1BG_HUMAN	ERnegDRpos	50	430000000	3.62966e+08
A1BG	A1BG_HUMAN	ERposDRneg	6	440000000	5.71396e+08
A1BG	A1BG_HUMAN	ERnegDRpos	5	440000000	4.33308e+08
A1BG	A1BG_HUMAN	ERposDRpos	53	480000000	226896000
A1BG	A1BG_HUMAN	ERnegDRpos	46	500000000	203750000
A1BG	A1BG_HUMAN	ERnegDRneg	10	640000000	4.44894e+08
A1BG	A1BG_HUMAN	ERposDRneg	24	660000000	5.1997e+08
A1BG	A1BG_HUMAN	ERposDRpos	43	710000000	3.49601e+08
A1BG	A1BG_HUMAN	ERposDRpos	44	710000000	3.29036e+08
A1BG	A1BG_HUMAN	ERnegDRpos	9	740000000	874495000
A1BG	A1BG_HUMAN	ERnegDRpos	13	860000000	9.23914e+08
LRG1	A2GL_HUMAN	ERnegDRneg	22	4000	4297.27
LRG1	A2GL_HUMAN	ERnegDRneg	31	45000	67314.9
LRG1	A2GL_HUMAN	ERposDRpos	35	68000	93987.1
LRG1	A2GL_HUMAN	ERnegDRpos	19	220000	236350
LRG1	A2GL_HUMAN	ERposDRpos	77	240000	1772625
LRG1	A2GL_HUMAN	ERposDRpos	37	240000	283620
LRG1	A2GL_HUMAN	ERnegDRpos	13	240000	257836
LRG1	A2GL_HUMAN	ERposDRneg	14	250000	268580
LRG1	A2GL_HUMAN	ERnegDRneg	12	260000	396458
LRG1	A2GL_HUMAN	ERposDRneg	36	280000	236350
LRG1	A2GL_HUMAN	ERposDRneg	15	280000	254531
LRG1	A2GL_HUMAN	ERnegDRneg	11	310000	281802
LRG1	A2GL_HUMAN	ERposDRpos	3	330000	299983
LRG1	A2GL_HUMAN	ERposDRpos	27	360000	434112
LRG1	A2GL_HUMAN	ERposDRpos	29	370000	437248
LRG1	A2GL_HUMAN	ERnegDRpos	21	520000	698307
LRG1	A2GL_HUMAN	ERnegDRneg	23	540000	531788
LRG1	A2GL_HUMAN	ERnegDRneg	18	580000	692338
LRG1	A2GL_HUMAN	ERnegDRneg	4	600000	590875
LRG1	A2GL_HUMAN	ERnegDRpos	5	630000	620419
LRG1	A2GL_HUMAN	ERnegDRpos	16	770000	535263
LRG1	A2GL_HUMAN	ERnegDRpos	9	790000	933583
LRG1	A2GL_HUMAN	ERposDRpos	40	960000	945400
LRG1	A2GL_HUMAN	ERnegDRpos	74	1000000	875370
LRG1	A2GL_HUMAN	ERnegDRneg	72	1000000	1.37413e+06
LRG1	A2GL_HUMAN	ERnegDRpos	7	1100000	764662
LRG1	A2GL_HUMAN	ERposDRneg	41	1100000	1.08327e+06
LRG1	A2GL_HUMAN	ERnegDRpos	78	1300000	2.04837e+06
LRG1	A2GL_HUMAN	ERnegDRneg	10	1300000	903691
LRG1	A2GL_HUMAN	ERposDRpos	17	1500000	1.61148e+06
LRG1	A2GL_HUMAN	ERnegDRneg	1	1600000	1.91959e+06
LRG1	A2GL_HUMAN	ERposDRpos	79	2200000	5.41635e+06
LRG1	A2GL_HUMAN	ERposDRneg	30	2300000	2.26502e+06
LRG1	A2GL_HUMAN	ERposDRpos	70	2600000	3072550
LRG1	A2GL_HUMAN	ERnegDRneg	20	2700000	1.8769e+06
LRG1	A2GL_HUMAN	ERposDRneg	66	3000000	5.13804e+06
LRG1	A2GL_HUMAN	ERnegDRpos	75	3100000	2.81802e+06
LRG1	A2GL_HUMAN	ERnegDRneg	48	3900000	5.32812e+06
LRG1	A2GL_HUMAN	ERposDRneg	52	4200000	5.45423e+06
LRG1	A2GL_HUMAN	ERnegDRneg	63	4600000	3.749e+06
LRG1	A2GL_HUMAN	ERnegDRneg	61	4700000	4.62852e+06
LRG1	A2GL_HUMAN	ERnegDRneg	54	4700000	4.27248e+06
LRG1	A2GL_HUMAN	ERposDRpos	71	4700000	6.17136e+06
LRG1	A2GL_HUMAN	ERposDRneg	64	5000000	7.57532e+06
LRG1	A2GL_HUMAN	ERposDRneg	58	5100000	1.22998e+07
LRG1	A2GL_HUMAN	ERposDRpos	60	5700000	5.18152e+06
LRG1	A2GL_HUMAN	ERnegDRpos	49	5900000	7.57861e+06
LRG1	A2GL_HUMAN	ERnegDRneg	51	6600000	5.57111e+06
LRG1	A2GL_HUMAN	ERposDRpos	65	6800000	4.22942e+06
LRG1	A2GL_HUMAN	ERposDRpos	45	7300000	7.18898e+06
LRG1	A2GL_HUMAN	ERposDRpos	57	7500000	6.3308e+06
LRG1	A2GL_HUMAN	ERnegDRpos	80	8700000	1.0491e+07
LRG1	A2GL_HUMAN	ERnegDRpos	62	9400000	1.52171e+07
LRG1	A2GL_HUMAN	ERposDRneg	47	10000000	1.07432e+07
LRG1	A2GL_HUMAN	ERnegDRneg	73	13000000	9.31076e+06
LRG1	A2GL_HUMAN	ERnegDRpos	50	14000000	11817500
LRG1	A2GL_HUMAN	ERposDRpos	59	16000000	1.26053e+07
LRG1	A2GL_HUMAN	ERnegDRneg	56	17000000	1.33932e+07
LRG1	A2GL_HUMAN	ERposDRpos	42	21000000	19853400
LRG1	A2GL_HUMAN	ERnegDRneg	69	22000000	1.73323e+07
LRG1	A2GL_HUMAN	ERposDRneg	68	26000000	1.61713e+07
LRG1	A2GL_HUMAN	ERposDRpos	53	30000000	14181000
LRG1	A2GL_HUMAN	ERposDRneg	55	35000000	3.18163e+07
LRG1	A2GL_HUMAN	ERposDRneg	6	37000000	4.80492e+07
LRG1	A2GL_HUMAN	ERposDRpos	43	38000000	1.8711e+07
LRG1	A2GL_HUMAN	ERnegDRpos	46	40000000	1.63e+07
LRG1	A2GL_HUMAN	ERposDRpos	44	74000000	3.42939e+07
SERPINA3	AACT_HUMAN	ERposDRpos	77	460000	3.39753e+06
SERPINA3	AACT_HUMAN	ERposDRneg	39	5300000	4.8179e+07
SERPINA3	AACT_HUMAN	ERposDRneg	66	24000000	4.11043e+07
SERPINA3	AACT_HUMAN	ERnegDRpos	25	26000000	3.6578e+07
SERPINA3	AACT_HUMAN	ERposDRneg	28	26000000	4.42094e+07
SERPINA3	AACT_HUMAN	ERnegDRpos	78	37000000	5.82997e+07
SERPINA3	AACT_HUMAN	ERnegDRneg	12	46000000	7.01426e+07
SERPINA3	AACT_HUMAN	ERposDRneg	34	56000000	6.01618e+07
SERPINA3	AACT_HUMAN	ERposDRneg	58	56000000	1.35057e+08
SERPINA3	AACT_HUMAN	ERnegDRneg	31	59000000	8.82573e+07
SERPINA3	AACT_HUMAN	ERnegDRpos	38	66000000	51997000
SERPINA3	AACT_HUMAN	ERnegDRpos	74	68000000	5.95252e+07
SERPINA3	AACT_HUMAN	ERposDRpos	35	69000000	9.53693e+07
SERPINA3	AACT_HUMAN	ERposDRpos	60	80000000	7.27231e+07
SERPINA3	AACT_HUMAN	ERposDRneg	33	85000000	7.17491e+07
SERPINA3	AACT_HUMAN	ERposDRneg	52	91000000	118175000
SERPINA3	AACT_HUMAN	ERposDRneg	41	91000000	8.9616e+07
SERPINA3	AACT_HUMAN	ERnegDRneg	18	95000000	1.134e+08
SERPINA3	AACT_HUMAN	ERposDRpos	37	95000000	112266250
SERPINA3	AACT_HUMAN	ERposDRpos	79	100000000	2.46198e+08
SERPINA3	AACT_HUMAN	ERposDRpos	29	100000000	1.18175e+08
SERPINA3	AACT_HUMAN	ERnegDRneg	72	100000000	1.37413e+08
SERPINA3	AACT_HUMAN	ERnegDRneg	32	110000000	1.51154e+08
SERPINA3	AACT_HUMAN	ERnegDRneg	22	110000000	1.18175e+08
SERPINA3	AACT_HUMAN	ERnegDRneg	1	120000000	1.4397e+08
SERPINA3	AACT_HUMAN	ERposDRneg	14	130000000	1.39661e+08
SERPINA3	AACT_HUMAN	ERnegDRpos	19	130000000	1.39661e+08
SERPINA3	AACT_HUMAN	ERnegDRneg	4	140000000	1.37871e+08
SERPINA3	AACT_HUMAN	ERnegDRneg	51	150000000	1.26616e+08
SERPINA3	AACT_HUMAN	ERposDRpos	17	150000000	1.61148e+08
SERPINA3	AACT_HUMAN	ERnegDRneg	73	180000000	1.28918e+08
SERPINA3	AACT_HUMAN	ERposDRpos	71	190000000	2.49481e+08
SERPINA3	AACT_HUMAN	ERnegDRpos	21	190000000	2.55151e+08
SERPINA3	AACT_HUMAN	ERnegDRneg	61	200000000	1.96958e+08
SERPINA3	AACT_HUMAN	ERposDRpos	70	230000000	271802500
SERPINA3	AACT_HUMAN	ERposDRpos	57	230000000	1.94145e+08
SERPINA3	AACT_HUMAN	ERnegDRneg	48	230000000	3.14223e+08
SERPINA3	AACT_HUMAN	ERposDRpos	65	240000000	1.49274e+08
SERPINA3	AACT_HUMAN	ERnegDRpos	50	240000000	2.02586e+08
SERPINA3	AACT_HUMAN	ERnegDRpos	75	250000000	2.2726e+08
SERPINA3	AACT_HUMAN	ERposDRpos	27	260000000	3.13526e+08
SERPINA3	AACT_HUMAN	ERnegDRpos	62	270000000	4.37086e+08
SERPINA3	AACT_HUMAN	ERnegDRpos	5	270000000	265893750
SERPINA3	AACT_HUMAN	ERnegDRpos	49	280000000	3.59663e+08
SERPINA3	AACT_HUMAN	ERnegDRpos	13	290000000	3.11552e+08
SERPINA3	AACT_HUMAN	ERposDRneg	64	290000000	4.39369e+08
SERPINA3	AACT_HUMAN	ERposDRpos	45	290000000	2.8559e+08
SERPINA3	AACT_HUMAN	ERposDRpos	53	300000000	141810000
SERPINA3	AACT_HUMAN	ERposDRneg	30	310000000	3.05285e+08
SERPINA3	AACT_HUMAN	ERposDRneg	15	330000000	2.99983e+08
SERPINA3	AACT_HUMAN	ERnegDRneg	23	340000000	3.34829e+08
SERPINA3	AACT_HUMAN	ERposDRpos	26	340000000	3.09073e+08
SERPINA3	AACT_HUMAN	ERposDRpos	3	350000000	3.18163e+08
SERPINA3	AACT_HUMAN	ERposDRpos	40	360000000	354525000
SERPINA3	AACT_HUMAN	ERposDRpos	42	370000000	349798000
SERPINA3	AACT_HUMAN	ERnegDRpos	8	370000000	3.36344e+08
SERPINA3	AACT_HUMAN	ERposDRneg	24	380000000	2.99377e+08
SERPINA3	AACT_HUMAN	ERnegDRneg	56	380000000	2.99377e+08
SERPINA3	AACT_HUMAN	ERnegDRneg	69	390000000	307255000
SERPINA3	AACT_HUMAN	ERnegDRpos	2	400000000	4.92396e+08
SERPINA3	AACT_HUMAN	ERposDRpos	59	430000000	3.38768e+08
SERPINA3	AACT_HUMAN	ERnegDRneg	63	440000000	358600000
SERPINA3	AACT_HUMAN	ERnegDRneg	54	450000000	4.09067e+08
SERPINA3	AACT_HUMAN	ERposDRneg	47	470000000	5.0493e+08
SERPINA3	AACT_HUMAN	ERposDRneg	68	510000000	3.17207e+08
SERPINA3	AACT_HUMAN	ERnegDRpos	9	520000000	614510000
SERPINA3	AACT_HUMAN	ERnegDRneg	20	540000000	3.75379e+08
SERPINA3	AACT_HUMAN	ERnegDRneg	11	540000000	4.90881e+08
SERPINA3	AACT_HUMAN	ERnegDRpos	80	580000000	6.99403e+08
SERPINA3	AACT_HUMAN	ERposDRneg	6	610000000	7.92162e+08
SERPINA3	AACT_HUMAN	ERnegDRneg	10	650000000	4.51846e+08
SERPINA3	AACT_HUMAN	ERnegDRpos	46	670000000	273025000
SERPINA3	AACT_HUMAN	ERnegDRpos	7	800000000	5.56118e+08
SERPINA3	AACT_HUMAN	ERposDRneg	36	850000000	7.17491e+08
SERPINA3	AACT_HUMAN	ERposDRpos	43	1100000000	5.41635e+08
SERPINA3	AACT_HUMAN	ERposDRneg	55	1200000000	1.09085e+09
SERPINA3	AACT_HUMAN	ERposDRpos	44	1400000000	6.48804e+08
SERPINA3	AACT_HUMAN	ERnegDRpos	16	1900000000	1.32078e+09
ABCA1	ABCA1_HUMAN	ERnegDRpos	75	620000	563604
ABCA1	ABCA1_HUMAN	ERposDRneg	68	1200000	746368
ABCA12	ABCAC_HUMAN	ERnegDRneg	1	1100000	1.31972e+06
ABCA12	ABCAC_HUMAN	ERnegDRneg	20	7000000	4.86603e+06
ABCA12	ABCAC_HUMAN	ERnegDRpos	46	22000000	8965000
ABP1	ABP1_HUMAN	ERnegDRneg	20	2600000	1.80738e+06
ACE	ACE_HUMAN	ERnegDRpos	49	230000	295438
ACE	ACE_HUMAN	ERnegDRpos	50	360000	303879
ACE	ACE_HUMAN	ERposDRneg	52	510000	662299
ACE	ACE_HUMAN	ERposDRpos	70	560000	661780
ACE	ACE_HUMAN	ERnegDRpos	62	600000	971301
ACE	ACE_HUMAN	ERnegDRpos	2	650000	800143
ACE	ACE_HUMAN	ERposDRpos	57	660000	557111
ACE	ACE_HUMAN	ERnegDRneg	48	670000	915344
ACE	ACE_HUMAN	ERposDRneg	55	710000	645417
ACE	ACE_HUMAN	ERposDRneg	66	980000	1.67843e+06
ACE	ACE_HUMAN	ERposDRpos	79	1000000	2.46198e+06
ACE	ACE_HUMAN	ERnegDRpos	78	1000000	1.57567e+06
ACE	ACE_HUMAN	ERnegDRpos	21	1000000	1.3429e+06
ACE	ACE_HUMAN	ERnegDRneg	63	1100000	896500
ACE	ACE_HUMAN	ERposDRpos	42	1300000	1229020
ACE	ACE_HUMAN	ERnegDRpos	25	1400000	1.96958e+06
ACE	ACE_HUMAN	ERnegDRpos	8	1400000	1.27265e+06
ACE	ACE_HUMAN	ERnegDRneg	4	1400000	1.37871e+06
ACE	ACE_HUMAN	ERnegDRneg	18	1400000	1.67116e+06
ACE	ACE_HUMAN	ERnegDRpos	5	1400000	1.37871e+06
ACE	ACE_HUMAN	ERposDRpos	65	1700000	1.05736e+06
ACE	ACE_HUMAN	ERposDRneg	64	1900000	2.87862e+06
ACE	ACE_HUMAN	ERposDRpos	3	2000000	1.81808e+06
ACE	ACE_HUMAN	ERnegDRpos	75	2000000	1.81808e+06
ACE	ACE_HUMAN	ERnegDRneg	61	2700000	2.65894e+06
ACE	ACE_HUMAN	ERnegDRneg	73	2700000	1.93377e+06
ACE	ACE_HUMAN	ERposDRneg	47	2800000	3.00809e+06
ACE	ACE_HUMAN	ERposDRneg	28	3400000	5.78122e+06
ACE	ACE_HUMAN	ERnegDRneg	54	3400000	3.09073e+06
ACE	ACE_HUMAN	ERnegDRpos	13	3500000	3.76011e+06
ACE	ACE_HUMAN	ERnegDRneg	56	3500000	2.75742e+06
ACE	ACE_HUMAN	ERnegDRneg	69	3500000	2.75742e+06
ACE	ACE_HUMAN	ERnegDRneg	51	3600000	3.03879e+06
ACE	ACE_HUMAN	ERposDRpos	71	4300000	5.64614e+06
ACE	ACE_HUMAN	ERnegDRneg	72	5200000	7.14547e+06
ACE	ACE_HUMAN	ERnegDRneg	31	6200000	9.27449e+06
ACE	ACE_HUMAN	ERposDRpos	43	14000000	6.89354e+06
ACE	ACE_HUMAN	ERposDRpos	60	15000000	1.36356e+07
ACE	ACE_HUMAN	ERposDRneg	68	19000000	11817500
ACE2	ACE2_HUMAN	ERnegDRneg	32	1700000	2.33602e+06
ACE2	ACE2_HUMAN	ERposDRpos	27	38000000	4.5823e+07
ADAM10	ADA10_HUMAN	ERnegDRneg	18	960000	1.14594e+06
ADAM10	ADA10_HUMAN	ERnegDRneg	4	1300000	1.28023e+06
ADAM10	ADA10_HUMAN	ERnegDRneg	31	1500000	2.24383e+06
ADAM10	ADA10_HUMAN	ERnegDRpos	74	1600000	1.40059e+06
ADAM10	ADA10_HUMAN	ERnegDRneg	73	1900000	1.3608e+06
ADAM10	ADA10_HUMAN	ERnegDRneg	72	1900000	2.61084e+06
ADAM10	ADA10_HUMAN	ERnegDRpos	78	1900000	2.99377e+06
ADAM10	ADA10_HUMAN	ERnegDRneg	51	2100000	1772625
ADAM10	ADA10_HUMAN	ERnegDRneg	69	2100000	1654450
ADAM10	ADA10_HUMAN	ERposDRneg	68	2300000	1.43054e+06
ADAM10	ADA10_HUMAN	ERposDRpos	71	2900000	3.80786e+06
ADAM10	ADA10_HUMAN	ERposDRpos	42	3500000	3308900
ADAM10	ADA10_HUMAN	ERposDRneg	64	4200000	6.36327e+06
ADAM10	ADA10_HUMAN	ERposDRpos	60	4600000	4.18158e+06
ADAM10	ADA10_HUMAN	ERnegDRpos	75	4700000	4.27248e+06
ADAM10	ADA10_HUMAN	ERnegDRneg	61	5400000	5317875
ADAM10	ADA10_HUMAN	ERposDRneg	28	7400000	1.25827e+07
ADAM10	ADA10_HUMAN	ERnegDRneg	54	9200000	8.36315e+06
ADAM10	ADA10_HUMAN	ERposDRpos	43	13000000	6.40115e+06
ADAM10	ADA10_HUMAN	ERposDRpos	57	21000000	17726250
ADAM17	ADA17_HUMAN	ERnegDRneg	23	320000	315133
ADAM17	ADA17_HUMAN	ERnegDRneg	18	330000	393917
ADAM17	ADA17_HUMAN	ERposDRneg	30	430000	423460
ADAM17	ADA17_HUMAN	ERposDRpos	26	430000	390887
ADAM17	ADA17_HUMAN	ERnegDRneg	12	520000	792916
ADAM17	ADA17_HUMAN	ERnegDRneg	32	600000	824477
ADAM17	ADA17_HUMAN	ERnegDRpos	25	630000	886312
ADAM17	ADA17_HUMAN	ERnegDRneg	31	640000	957367
ADAM17	ADA17_HUMAN	ERnegDRneg	1	640000	767838
ADAM17	ADA17_HUMAN	ERposDRpos	29	740000	874495
ADAM17	ADA17_HUMAN	ERposDRpos	35	1000000	1.38216e+06
ADAM17	ADA17_HUMAN	ERnegDRneg	51	1300000	1.09734e+06
ADAM17	ADA17_HUMAN	ERposDRneg	6	1300000	1.68821e+06
ADAM17	ADA17_HUMAN	ERnegDRneg	73	1300000	931076
ADAM17	ADA17_HUMAN	ERnegDRpos	75	1900000	1.72717e+06
ADAM17	ADA17_HUMAN	ERnegDRneg	69	2000000	1.57567e+06
ADAM17	ADA17_HUMAN	ERposDRneg	68	2000000	1.24395e+06
ADAM17	ADA17_HUMAN	ERposDRneg	28	2000000	3.40072e+06
ADAM17	ADA17_HUMAN	ERnegDRneg	54	2100000	1.90898e+06
ADAM17	ADA17_HUMAN	ERposDRpos	43	2300000	1.13251e+06
ADAM17	ADA17_HUMAN	ERposDRneg	64	3100000	4.6967e+06
ADAM17	ADA17_HUMAN	ERnegDRneg	72	3200000	4.39721e+06
ADAM17	ADA17_HUMAN	ERposDRpos	57	3800000	3.20761e+06
ADAM17	ADA17_HUMAN	ERposDRpos	60	4800000	4.36338e+06
AADACL1	NCEH1_HUMAN	ERnegDRpos	49	340000	436734
AADACL1	NCEH1_HUMAN	ERnegDRpos	62	470000	760853
AADACL1	NCEH1_HUMAN	ERnegDRneg	61	480000	472700
AADACL1	NCEH1_HUMAN	ERposDRpos	59	520000	409673
AADACL1	NCEH1_HUMAN	ERposDRneg	47	680000	730536
AADACL1	NCEH1_HUMAN	ERposDRneg	52	830000	1.07786e+06
AADACL1	NCEH1_HUMAN	ERnegDRneg	56	890000	701172
AADACL1	NCEH1_HUMAN	ERnegDRneg	69	1000000	787833
AADACL1	NCEH1_HUMAN	ERposDRpos	71	1100000	1.44436e+06
AADACL1	NCEH1_HUMAN	ERposDRpos	79	1200000	2954375
AADACL1	NCEH1_HUMAN	ERnegDRpos	75	1300000	1181750
AADACL1	NCEH1_HUMAN	ERposDRpos	57	1400000	1181750
AADACL1	NCEH1_HUMAN	ERnegDRpos	78	1600000	2.52107e+06
AADACL1	NCEH1_HUMAN	ERposDRneg	66	2000000	3.42536e+06
AADACL1	NCEH1_HUMAN	ERposDRpos	42	2000000	1890800
AADACL1	NCEH1_HUMAN	ERnegDRneg	48	2200000	3.00561e+06
AADACL1	NCEH1_HUMAN	ERposDRpos	60	2200000	1.99988e+06
AADACL1	NCEH1_HUMAN	ERnegDRneg	51	2300000	1.94145e+06
AADACL1	NCEH1_HUMAN	ERposDRpos	70	2400000	2836200
AADACL1	NCEH1_HUMAN	ERnegDRpos	46	2400000	978000
AADACL1	NCEH1_HUMAN	ERposDRneg	55	2400000	2.18169e+06
AADACL1	NCEH1_HUMAN	ERposDRneg	64	3400000	5.15122e+06
AADACL1	NCEH1_HUMAN	ERnegDRneg	54	13000000	11817500
AADACL1	NCEH1_HUMAN	ERnegDRneg	72	14000000	1.92378e+07
AADACL1	NCEH1_HUMAN	ERposDRpos	43	25000000	1.23099e+07
AADACL1	NCEH1_HUMAN	ERposDRneg	68	38000000	23635000
AFM	AFAM_HUMAN	ERposDRneg	67	170000	2.00898e+06
AFM	AFAM_HUMAN	ERnegDRpos	76	250000	2363500
AFM	AFAM_HUMAN	ERposDRneg	39	950000	8.63587e+06
AFM	AFAM_HUMAN	ERposDRpos	77	1900000	1.40333e+07
AFM	AFAM_HUMAN	ERposDRneg	58	8400000	2.02586e+07
AFM	AFAM_HUMAN	ERnegDRpos	38	11000000	8.66617e+06
AFM	AFAM_HUMAN	ERposDRneg	28	11000000	1.8704e+07
AFM	AFAM_HUMAN	ERposDRpos	35	13000000	1.79681e+07
AFM	AFAM_HUMAN	ERposDRpos	37	14000000	1.65445e+07
AFM	AFAM_HUMAN	ERposDRneg	64	15000000	2.2726e+07
AFM	AFAM_HUMAN	ERnegDRneg	22	16000000	1.71891e+07
AFM	AFAM_HUMAN	ERnegDRpos	74	16000000	1.40059e+07
AFM	AFAM_HUMAN	ERposDRneg	34	17000000	1.82634e+07
AFM	AFAM_HUMAN	ERposDRpos	70	17000000	20089750
AFM	AFAM_HUMAN	ERposDRneg	30	18000000	17726250
AFM	AFAM_HUMAN	ERnegDRpos	2	18000000	2.21578e+07
AFM	AFAM_HUMAN	ERnegDRneg	31	20000000	2.99177e+07
AFM	AFAM_HUMAN	ERnegDRneg	32	20000000	2.74826e+07
AFM	AFAM_HUMAN	ERnegDRneg	73	20000000	1.43242e+07
AFM	AFAM_HUMAN	ERposDRpos	27	21000000	2.53232e+07
AFM	AFAM_HUMAN	ERnegDRneg	12	21000000	3.20216e+07
AFM	AFAM_HUMAN	ERnegDRneg	1	22000000	2.63944e+07
AFM	AFAM_HUMAN	ERnegDRneg	4	23000000	2.26502e+07
AFM	AFAM_HUMAN	ERnegDRneg	63	24000000	19560000
AFM	AFAM_HUMAN	ERnegDRpos	78	25000000	3.93917e+07
AFM	AFAM_HUMAN	ERposDRpos	3	26000000	23635000
AFM	AFAM_HUMAN	ERnegDRpos	49	26000000	3.33973e+07
AFM	AFAM_HUMAN	ERposDRpos	45	26000000	2.56046e+07
AFM	AFAM_HUMAN	ERposDRneg	14	27000000	2.90066e+07
AFM	AFAM_HUMAN	ERnegDRneg	48	27000000	3.6887e+07
AFM	AFAM_HUMAN	ERnegDRneg	51	28000000	23635000
AFM	AFAM_HUMAN	ERposDRpos	59	28000000	2.20593e+07
AFM	AFAM_HUMAN	ERposDRpos	65	28000000	1.74153e+07
AFM	AFAM_HUMAN	ERposDRneg	33	28000000	23635000
AFM	AFAM_HUMAN	ERposDRpos	29	29000000	34270750
AFM	AFAM_HUMAN	ERposDRneg	36	31000000	2.61673e+07
AFM	AFAM_HUMAN	ERnegDRpos	25	31000000	4.36122e+07
AFM	AFAM_HUMAN	ERposDRpos	26	32000000	2.90892e+07
AFM	AFAM_HUMAN	ERposDRpos	60	33000000	2.99983e+07
AFM	AFAM_HUMAN	ERposDRneg	66	34000000	5.82312e+07
AFM	AFAM_HUMAN	ERposDRneg	41	35000000	3.44677e+07
AFM	AFAM_HUMAN	ERnegDRpos	62	37000000	5.98969e+07
AFM	AFAM_HUMAN	ERnegDRneg	61	40000000	3.93917e+07
AFM	AFAM_HUMAN	ERnegDRpos	19	42000000	4.51214e+07
AFM	AFAM_HUMAN	ERposDRneg	24	47000000	3.70282e+07
AFM	AFAM_HUMAN	ERnegDRpos	80	47000000	5.66758e+07
AFM	AFAM_HUMAN	ERposDRpos	42	49000000	46324600
AFM	AFAM_HUMAN	ERnegDRpos	50	50000000	4.22054e+07
AFM	AFAM_HUMAN	ERnegDRpos	7	52000000	3.61476e+07
AFM	AFAM_HUMAN	ERposDRpos	57	53000000	4.47377e+07
AFM	AFAM_HUMAN	ERnegDRpos	21	53000000	7.11736e+07
AFM	AFAM_HUMAN	ERnegDRpos	9	55000000	6.49963e+07
AFM	AFAM_HUMAN	ERposDRneg	52	56000000	7.27231e+07
AFM	AFAM_HUMAN	ERnegDRneg	72	56000000	7.69512e+07
AFM	AFAM_HUMAN	ERnegDRpos	46	58000000	23635000
AFM	AFAM_HUMAN	ERposDRpos	71	59000000	7.74703e+07
AFM	AFAM_HUMAN	ERposDRneg	47	62000000	6.66077e+07
AFM	AFAM_HUMAN	ERnegDRpos	75	63000000	5.72694e+07
AFM	AFAM_HUMAN	ERposDRpos	79	66000000	162490625
AFM	AFAM_HUMAN	ERposDRpos	40	67000000	6.5981e+07
AFM	AFAM_HUMAN	ERposDRpos	17	68000000	7.30536e+07
AFM	AFAM_HUMAN	ERnegDRneg	56	68000000	5.35727e+07
AFM	AFAM_HUMAN	ERnegDRneg	18	71000000	8.47518e+07
AFM	AFAM_HUMAN	ERnegDRpos	5	71000000	6.99202e+07
AFM	AFAM_HUMAN	ERnegDRpos	13	75000000	8.05739e+07
AFM	AFAM_HUMAN	ERposDRneg	68	81000000	5.03799e+07
AFM	AFAM_HUMAN	ERnegDRneg	10	81000000	5.63069e+07
AFM	AFAM_HUMAN	ERposDRneg	15	81000000	7.36321e+07
AFM	AFAM_HUMAN	ERnegDRpos	16	87000000	6.04778e+07
AFM	AFAM_HUMAN	ERnegDRneg	69	88000000	6.93293e+07
AFM	AFAM_HUMAN	ERnegDRneg	23	90000000	88631250
AFM	AFAM_HUMAN	ERnegDRneg	54	93000000	8.45406e+07
AFM	AFAM_HUMAN	ERnegDRneg	11	98000000	8.90858e+07
AFM	AFAM_HUMAN	ERnegDRpos	8	110000000	9.99942e+07
AFM	AFAM_HUMAN	ERposDRpos	53	130000000	61451000
AFM	AFAM_HUMAN	ERposDRneg	55	130000000	118175000
AFM	AFAM_HUMAN	ERnegDRneg	20	140000000	9.73206e+07
AFM	AFAM_HUMAN	ERposDRneg	6	190000000	2.46739e+08
AFM	AFAM_HUMAN	ERposDRpos	44	200000000	9.26863e+07
AFM	AFAM_HUMAN	ERposDRpos	43	230000000	1.13251e+08
GLA	AGAL_HUMAN	ERnegDRneg	72	520000	714547
GLA	AGAL_HUMAN	ERposDRpos	71	550000	722181
GLA	AGAL_HUMAN	ERposDRpos	42	670000	633418
AGRN	AGRIN_HUMAN	ERposDRpos	29	210000	248168
AGRN	AGRIN_HUMAN	ERnegDRpos	38	430000	338768
AGRN	AGRIN_HUMAN	ERposDRpos	79	480000	1181750
AGRN	AGRIN_HUMAN	ERposDRneg	58	620000	1.49528e+06
AGRN	AGRIN_HUMAN	ERnegDRpos	21	660000	886313
AGRN	AGRIN_HUMAN	ERposDRneg	55	800000	727231
AGRN	AGRIN_HUMAN	ERnegDRneg	18	1100000	1.31306e+06
AGRN	AGRIN_HUMAN	ERnegDRneg	31	1200000	1.79506e+06
AGRN	AGRIN_HUMAN	ERposDRpos	37	1300000	1536275
AGRN	AGRIN_HUMAN	ERnegDRneg	48	1400000	1.91266e+06
AGRN	AGRIN_HUMAN	ERposDRpos	71	1500000	1.96958e+06
AGRN	AGRIN_HUMAN	ERnegDRneg	51	1600000	1.35057e+06
AGRN	AGRIN_HUMAN	ERnegDRneg	69	1600000	1.26053e+06
AGRN	AGRIN_HUMAN	ERnegDRpos	49	1700000	2.18367e+06
AGRN	AGRIN_HUMAN	ERnegDRpos	78	2000000	3.15133e+06
AGRN	AGRIN_HUMAN	ERposDRneg	28	2300000	3.91083e+06
AGRN	AGRIN_HUMAN	ERposDRneg	64	2300000	3.48465e+06
AGRN	AGRIN_HUMAN	ERposDRpos	3	2400000	2.18169e+06
AGRN	AGRIN_HUMAN	ERposDRneg	66	2500000	4.2817e+06
AGRN	AGRIN_HUMAN	ERposDRpos	57	2500000	2.11027e+06
AGRN	AGRIN_HUMAN	ERnegDRneg	32	2700000	3.71015e+06
AGRN	AGRIN_HUMAN	ERposDRneg	41	2900000	2.8559e+06
AGRN	AGRIN_HUMAN	ERnegDRpos	46	2900000	1181750
AGRN	AGRIN_HUMAN	ERnegDRneg	54	3200000	2.90892e+06
AGRN	AGRIN_HUMAN	ERposDRpos	53	3300000	1559910
AGRN	AGRIN_HUMAN	ERposDRpos	43	3400000	1.67415e+06
AGRN	AGRIN_HUMAN	ERnegDRpos	80	3800000	4.5823e+06
AGRN	AGRIN_HUMAN	ERposDRneg	68	4000000	2.48789e+06
AGRN	AGRIN_HUMAN	ERnegDRpos	25	4300000	6.04943e+06
AGRN	AGRIN_HUMAN	ERnegDRneg	72	4400000	6.04616e+06
AGRN	AGRIN_HUMAN	ERnegDRneg	20	6000000	4.17088e+06
AGRN	AGRIN_HUMAN	ERposDRpos	45	6100000	6.00723e+06
AGRN	AGRIN_HUMAN	ERnegDRneg	23	6500000	6.40115e+06
AGRN	AGRIN_HUMAN	ERposDRpos	26	6700000	6.09056e+06
AGRN	AGRIN_HUMAN	ERnegDRpos	75	10000000	9.09038e+06
AGRN	AGRIN_HUMAN	ERposDRneg	47	12000000	1.28918e+07
AGRN	AGRIN_HUMAN	ERposDRpos	60	32000000	2.90892e+07
AGTR1	AGTR1_HUMAN	ERposDRpos	29	260000	307255
AGTR1	AGTR1_HUMAN	ERnegDRpos	21	330000	443156
AGTR1	AGTR1_HUMAN	ERposDRneg	30	430000	423460
AGTR1	AGTR1_HUMAN	ERposDRneg	66	640000	1.09612e+06
AGTR1	AGTR1_HUMAN	ERposDRpos	60	1500000	1.36356e+06
AGTR1	AGTR1_HUMAN	ERnegDRneg	56	3600000	2836200
IGFALS	ALS_HUMAN	ERnegDRpos	80	410000	494406
IGFALS	ALS_HUMAN	ERposDRneg	47	1500000	1.61148e+06
IGFALS	ALS_HUMAN	ERnegDRneg	56	1700000	1.33932e+06
IGFALS	ALS_HUMAN	ERnegDRneg	54	2700000	2.4544e+06
IGFALS	ALS_HUMAN	ERposDRpos	43	4300000	2.1173e+06
IGFALS	ALS_HUMAN	ERposDRneg	55	9100000	8272250
ENPEP	AMPE_HUMAN	ERposDRneg	6	250000	324657
ENPEP	AMPE_HUMAN	ERnegDRneg	69	580000	456943
ENPEP	AMPE_HUMAN	ERnegDRpos	75	990000	899948
ENPEP	AMPE_HUMAN	ERnegDRneg	32	1200000	1.64895e+06
ENPEP	AMPE_HUMAN	ERnegDRpos	49	1200000	1.54141e+06
ENPEP	AMPE_HUMAN	ERnegDRneg	48	1200000	1.63942e+06
ENPEP	AMPE_HUMAN	ERposDRneg	66	1400000	2.39775e+06
ENPEP	AMPE_HUMAN	ERnegDRneg	54	1800000	1.63627e+06
ENPEP	AMPE_HUMAN	ERnegDRpos	21	2100000	2.82009e+06
ENPEP	AMPE_HUMAN	ERposDRpos	26	2500000	2.2726e+06
ENPEP	AMPE_HUMAN	ERnegDRpos	38	3300000	2599850
ENPEP	AMPE_HUMAN	ERposDRneg	64	4500000	6.81779e+06
ENPEP	AMPE_HUMAN	ERposDRpos	43	9200000	4.53004e+06
ANGPTL2	ANGL2_HUMAN	ERposDRpos	77	210000	1.55105e+06
ANGPTL2	ANGL2_HUMAN	ERposDRneg	39	270000	2.4544e+06
ANGPTL2	ANGL2_HUMAN	ERnegDRneg	1	710000	851820
ANGPTL2	ANGL2_HUMAN	ERposDRneg	58	980000	2363500
ANGPTL2	ANGL2_HUMAN	ERposDRneg	66	1000000	1.71268e+06
ANGPTL2	ANGL2_HUMAN	ERnegDRneg	11	1500000	1.36356e+06
ANGPTL2	ANGL2_HUMAN	ERnegDRneg	72	1500000	2.06119e+06
ANGPTL2	ANGL2_HUMAN	ERnegDRpos	9	1500000	1.77263e+06
ANGPTL2	ANGL2_HUMAN	ERposDRneg	47	1700000	1.82634e+06
ANGPTL2	ANGL2_HUMAN	ERnegDRpos	25	1800000	2.53232e+06
ANGPTL2	ANGL2_HUMAN	ERposDRpos	60	1900000	1.72717e+06
ANGPTL2	ANGL2_HUMAN	ERposDRneg	6	1900000	2.46739e+06
ANGPTL2	ANGL2_HUMAN	ERposDRneg	68	2000000	1.24395e+06
ANGPTL2	ANGL2_HUMAN	ERnegDRneg	20	2100000	1.45981e+06
ANGPTL2	ANGL2_HUMAN	ERnegDRpos	80	2100000	2.53232e+06
ANGPTL2	ANGL2_HUMAN	ERnegDRneg	12	2200000	3.35465e+06
ANGPTL2	ANGL2_HUMAN	ERnegDRpos	8	2300000	2.09079e+06
ANGPTL2	ANGL2_HUMAN	ERnegDRneg	61	2400000	2363500
ANGPTL2	ANGL2_HUMAN	ERposDRpos	35	2400000	3.31719e+06
ANGPTL2	ANGL2_HUMAN	ERnegDRneg	31	2500000	3.73972e+06
ANGPTL2	ANGL2_HUMAN	ERnegDRneg	56	2600000	2.04837e+06
ANGPTL2	ANGL2_HUMAN	ERnegDRpos	13	2700000	2.90066e+06
ANGPTL2	ANGL2_HUMAN	ERnegDRpos	5	2800000	2.75742e+06
ANGPTL2	ANGL2_HUMAN	ERposDRpos	37	2900000	3427075
ANGPTL2	ANGL2_HUMAN	ERnegDRneg	32	3000000	4.12238e+06
ANGPTL2	ANGL2_HUMAN	ERposDRpos	42	3100000	2930740
ANGPTL2	ANGL2_HUMAN	ERnegDRpos	19	3200000	3.43782e+06
ANGPTL2	ANGL2_HUMAN	ERnegDRpos	49	3300000	4.23889e+06
ANGPTL2	ANGL2_HUMAN	ERnegDRneg	22	3900000	4.18984e+06
ANGPTL2	ANGL2_HUMAN	ERposDRpos	53	4200000	1985340
ANGPTL2	ANGL2_HUMAN	ERnegDRneg	48	4500000	6.14783e+06
ANGPTL2	ANGL2_HUMAN	ERnegDRpos	21	4900000	6.5802e+06
ANGPTL2	ANGL2_HUMAN	ERposDRpos	44	5400000	2.50253e+06
ANGPTL2	ANGL2_HUMAN	ERposDRneg	41	5400000	5317875
ANGPTL2	ANGL2_HUMAN	ERposDRpos	29	6600000	7.79955e+06
ANGPTL2	ANGL2_HUMAN	ERnegDRneg	73	7500000	5.37159e+06
ANGPTL2	ANGL2_HUMAN	ERnegDRneg	69	7700000	6.06632e+06
ANGPTL2	ANGL2_HUMAN	ERnegDRneg	18	8700000	1.03851e+07
ANGPTL2	ANGL2_HUMAN	ERposDRpos	65	9000000	5.59776e+06
ANGPTL2	ANGL2_HUMAN	ERnegDRpos	2	9200000	1.13251e+07
ANGPTL2	ANGL2_HUMAN	ERposDRpos	26	9200000	8.36315e+06
ANGPTL2	ANGL2_HUMAN	ERposDRpos	70	9500000	11226625
ANGPTL2	ANGL2_HUMAN	ERnegDRpos	78	9500000	1.49688e+07
ANGPTL2	ANGL2_HUMAN	ERposDRpos	43	9700000	4.77624e+06
ANGPTL2	ANGL2_HUMAN	ERposDRpos	45	10000000	9.84792e+06
ANGPTL2	ANGL2_HUMAN	ERposDRneg	55	10000000	9.09038e+06
ANGPTL2	ANGL2_HUMAN	ERposDRneg	34	11000000	1.18175e+07
ANGPTL2	ANGL2_HUMAN	ERnegDRneg	63	11000000	8965000
ANGPTL2	ANGL2_HUMAN	ERnegDRneg	54	11000000	9.99942e+06
ANGPTL2	ANGL2_HUMAN	ERposDRneg	64	12000000	1.81808e+07
ANGPTL2	ANGL2_HUMAN	ERposDRpos	57	14000000	11817500
ANGPTL2	ANGL2_HUMAN	ERposDRneg	14	14000000	1.50405e+07
ANGPTL2	ANGL2_HUMAN	ERnegDRpos	75	15000000	1.36356e+07
ANGPTL2	ANGL2_HUMAN	ERposDRneg	33	16000000	1.35057e+07
ANGPTL2	ANGL2_HUMAN	ERnegDRneg	4	27000000	26589375
ANGPTL2	ANGL2_HUMAN	ERnegDRpos	38	28000000	2.20593e+07
ANGPTL2	ANGL2_HUMAN	ERnegDRneg	51	37000000	3.1232e+07
ANGPTL2	ANGL2_HUMAN	ERnegDRneg	23	59000000	5.81027e+07
ANGPTL4	ANGL4_HUMAN	ERnegDRneg	20	150000	104272
ANGPTL4	ANGL4_HUMAN	ERnegDRneg	51	190000	160380
ANGPTL4	ANGL4_HUMAN	ERnegDRpos	49	340000	436734
ANGPTL4	ANGL4_HUMAN	ERnegDRneg	54	570000	518152
ANGPTL4	ANGL4_HUMAN	ERposDRneg	55	1100000	999942
ANGPTL4	ANGL4_HUMAN	ERnegDRpos	75	1700000	1.54537e+06
ANGPTL4	ANGL4_HUMAN	ERnegDRneg	23	2500000	2.46198e+06
AGT	ANGT_HUMAN	ERposDRneg	52	1100000	1.42849e+06
AGT	ANGT_HUMAN	ERnegDRpos	78	4900000	7.72077e+06
AGT	ANGT_HUMAN	ERposDRpos	37	5000000	5908750
AGT	ANGT_HUMAN	ERnegDRneg	31	5300000	7.9282e+06
AGT	ANGT_HUMAN	ERposDRneg	36	5700000	4.81141e+06
AGT	ANGT_HUMAN	ERnegDRneg	51	5800000	4.89582e+06
AGT	ANGT_HUMAN	ERnegDRpos	38	5900000	4.64822e+06
AGT	ANGT_HUMAN	ERposDRneg	28	6000000	1.02022e+07
AGT	ANGT_HUMAN	ERposDRneg	34	6400000	6.87564e+06
AGT	ANGT_HUMAN	ERposDRpos	45	6400000	6.30267e+06
AGT	ANGT_HUMAN	ERnegDRneg	63	8400000	6846000
AGT	ANGT_HUMAN	ERnegDRneg	12	8600000	1.31136e+07
AGT	ANGT_HUMAN	ERposDRneg	66	9200000	1.57567e+07
AGT	ANGT_HUMAN	ERposDRpos	26	11000000	9.99942e+06
AGT	ANGT_HUMAN	ERnegDRneg	48	12000000	1.63942e+07
AGT	ANGT_HUMAN	ERposDRpos	70	12000000	1.4181e+07
AGT	ANGT_HUMAN	ERposDRneg	41	13000000	1.28023e+07
AGT	ANGT_HUMAN	ERnegDRpos	74	14000000	1.22552e+07
AGT	ANGT_HUMAN	ERposDRpos	40	14000000	1.37871e+07
AGT	ANGT_HUMAN	ERposDRneg	14	14000000	1.50405e+07
AGT	ANGT_HUMAN	ERnegDRpos	49	15000000	1.92677e+07
AGT	ANGT_HUMAN	ERposDRpos	17	16000000	1.71891e+07
AGT	ANGT_HUMAN	ERposDRpos	60	17000000	1.54537e+07
AGT	ANGT_HUMAN	ERposDRpos	29	18000000	21271500
AGT	ANGT_HUMAN	ERnegDRneg	1	19000000	2.27952e+07
AGT	ANGT_HUMAN	ERposDRneg	33	19000000	1.6038e+07
AGT	ANGT_HUMAN	ERposDRpos	71	19000000	2.49481e+07
AGT	ANGT_HUMAN	ERnegDRneg	72	19000000	2.61084e+07
AGT	ANGT_HUMAN	ERposDRneg	64	20000000	3.03013e+07
AGT	ANGT_HUMAN	ERnegDRneg	54	20000000	1.81808e+07
AGT	ANGT_HUMAN	ERnegDRpos	2	21000000	2.58508e+07
AGT	ANGT_HUMAN	ERnegDRneg	4	22000000	2.16654e+07
AGT	ANGT_HUMAN	ERnegDRpos	62	22000000	3.56144e+07
AGT	ANGT_HUMAN	ERnegDRneg	32	22000000	3.02308e+07
AGT	ANGT_HUMAN	ERnegDRneg	61	22000000	2.16654e+07
AGT	ANGT_HUMAN	ERposDRpos	79	23000000	5.66255e+07
AGT	ANGT_HUMAN	ERposDRpos	3	26000000	23635000
AGT	ANGT_HUMAN	ERnegDRneg	73	26000000	1.86215e+07
AGT	ANGT_HUMAN	ERnegDRpos	75	27000000	2.4544e+07
AGT	ANGT_HUMAN	ERposDRpos	35	27000000	3.73184e+07
AGT	ANGT_HUMAN	ERnegDRpos	7	29000000	2.01593e+07
AGT	ANGT_HUMAN	ERnegDRneg	18	29000000	3.46169e+07
AGT	ANGT_HUMAN	ERnegDRpos	80	30000000	3.6176e+07
AGT	ANGT_HUMAN	ERnegDRpos	5	33000000	32498125
AGT	ANGT_HUMAN	ERposDRneg	47	33000000	35452500
AGT	ANGT_HUMAN	ERnegDRpos	19	35000000	3.76011e+07
AGT	ANGT_HUMAN	ERposDRpos	65	35000000	2.17691e+07
AGT	ANGT_HUMAN	ERnegDRpos	13	36000000	3.86755e+07
AGT	ANGT_HUMAN	ERposDRneg	30	37000000	3.64373e+07
AGT	ANGT_HUMAN	ERnegDRpos	21	37000000	4.96872e+07
AGT	ANGT_HUMAN	ERnegDRneg	22	39000000	4.18984e+07
AGT	ANGT_HUMAN	ERposDRneg	68	41000000	2.55009e+07
AGT	ANGT_HUMAN	ERposDRpos	59	41000000	3.23012e+07
AGT	ANGT_HUMAN	ERnegDRneg	20	41000000	2.8501e+07
AGT	ANGT_HUMAN	ERposDRpos	42	41000000	38761400
AGT	ANGT_HUMAN	ERposDRpos	57	42000000	35452500
AGT	ANGT_HUMAN	ERnegDRneg	56	44000000	3.46647e+07
AGT	ANGT_HUMAN	ERnegDRpos	8	48000000	4.36338e+07
AGT	ANGT_HUMAN	ERnegDRneg	69	50000000	3.93917e+07
AGT	ANGT_HUMAN	ERnegDRneg	10	52000000	3.61476e+07
AGT	ANGT_HUMAN	ERposDRpos	27	53000000	6.3911e+07
AGT	ANGT_HUMAN	ERnegDRneg	23	60000000	59087500
AGT	ANGT_HUMAN	ERnegDRpos	50	60000000	5.06464e+07
AGT	ANGT_HUMAN	ERnegDRpos	9	61000000	72086750
AGT	ANGT_HUMAN	ERnegDRpos	25	73000000	1.027e+08
AGT	ANGT_HUMAN	ERposDRpos	53	74000000	34979800
AGT	ANGT_HUMAN	ERnegDRneg	11	75000000	6.81779e+07
AGT	ANGT_HUMAN	ERnegDRpos	46	80000000	3.26e+07
AGT	ANGT_HUMAN	ERposDRneg	24	97000000	7.64198e+07
AGT	ANGT_HUMAN	ERposDRpos	43	140000000	6.89354e+07
AGT	ANGT_HUMAN	ERposDRneg	55	150000000	1.36356e+08
AGT	ANGT_HUMAN	ERposDRneg	15	160000000	1.45446e+08
AGT	ANGT_HUMAN	ERposDRneg	6	170000000	2.20766e+08
AGT	ANGT_HUMAN	ERnegDRpos	16	180000000	1.25126e+08
AGT	ANGT_HUMAN	ERposDRpos	44	230000000	1.06589e+08
ANO1	ANO1_HUMAN	ERnegDRneg	54	400000	363615
AT-III	ANT3_HUMAN	ERposDRneg	39	1100000	9.99942e+06
AT-III	ANT3_HUMAN	ERnegDRpos	76	1300000	12290200
AT-III	ANT3_HUMAN	ERposDRneg	67	4800000	5.6724e+07
AT-III	ANT3_HUMAN	ERposDRneg	28	52000000	8.84187e+07
AT-III	ANT3_HUMAN	ERposDRpos	77	55000000	4.06227e+08
AT-III	ANT3_HUMAN	ERposDRpos	17	62000000	6.66077e+07
AT-III	ANT3_HUMAN	ERnegDRneg	18	71000000	8.47518e+07
AT-III	ANT3_HUMAN	ERposDRpos	35	72000000	9.95158e+07
AT-III	ANT3_HUMAN	ERnegDRpos	2	94000000	1.15713e+08
AT-III	ANT3_HUMAN	ERnegDRneg	4	97000000	9.55248e+07
AT-III	ANT3_HUMAN	ERposDRneg	14	100000000	1.07432e+08
AT-III	ANT3_HUMAN	ERposDRneg	41	110000000	1.08327e+08
AT-III	ANT3_HUMAN	ERposDRneg	52	110000000	1.42849e+08
AT-III	ANT3_HUMAN	ERnegDRpos	25	110000000	1.54753e+08
AT-III	ANT3_HUMAN	ERnegDRneg	12	110000000	1.67732e+08
AT-III	ANT3_HUMAN	ERposDRneg	33	120000000	1.01293e+08
AT-III	ANT3_HUMAN	ERnegDRneg	1	120000000	1.4397e+08
AT-III	ANT3_HUMAN	ERnegDRneg	22	130000000	1.39661e+08
AT-III	ANT3_HUMAN	ERnegDRpos	7	140000000	9.73206e+07
AT-III	ANT3_HUMAN	ERnegDRneg	31	140000000	2.09424e+08
AT-III	ANT3_HUMAN	ERnegDRpos	78	160000000	2.52107e+08
AT-III	ANT3_HUMAN	ERposDRneg	34	180000000	1.93377e+08
AT-III	ANT3_HUMAN	ERnegDRneg	51	190000000	1.6038e+08
AT-III	ANT3_HUMAN	ERposDRneg	36	200000000	1.68821e+08
AT-III	ANT3_HUMAN	ERnegDRpos	16	220000000	1.52932e+08
AT-III	ANT3_HUMAN	ERnegDRneg	72	220000000	3.02308e+08
AT-III	ANT3_HUMAN	ERposDRneg	58	240000000	5.78816e+08
AT-III	ANT3_HUMAN	ERposDRpos	70	260000000	307255000
AT-III	ANT3_HUMAN	ERnegDRpos	8	270000000	2.4544e+08
AT-III	ANT3_HUMAN	ERposDRpos	29	290000000	342707500
AT-III	ANT3_HUMAN	ERnegDRpos	21	290000000	3.8944e+08
AT-III	ANT3_HUMAN	ERposDRneg	6	290000000	3.76602e+08
AT-III	ANT3_HUMAN	ERposDRpos	79	300000000	738593750
AT-III	ANT3_HUMAN	ERposDRpos	27	300000000	3.6176e+08
AT-III	ANT3_HUMAN	ERposDRneg	66	310000000	5.30931e+08
AT-III	ANT3_HUMAN	ERposDRpos	45	320000000	3.15133e+08
AT-III	ANT3_HUMAN	ERposDRpos	71	320000000	4.20178e+08
AT-III	ANT3_HUMAN	ERposDRpos	37	320000000	378160000
AT-III	ANT3_HUMAN	ERposDRpos	3	330000000	2.99983e+08
AT-III	ANT3_HUMAN	ERposDRneg	15	330000000	2.99983e+08
AT-III	ANT3_HUMAN	ERnegDRneg	73	340000000	2.43512e+08
AT-III	ANT3_HUMAN	ERnegDRneg	61	350000000	3.44677e+08
AT-III	ANT3_HUMAN	ERposDRneg	64	350000000	5.30272e+08
AT-III	ANT3_HUMAN	ERnegDRneg	32	360000000	4.94686e+08
AT-III	ANT3_HUMAN	ERposDRpos	40	370000000	3.64373e+08
AT-III	ANT3_HUMAN	ERposDRneg	30	380000000	3.74221e+08
AT-III	ANT3_HUMAN	ERnegDRneg	11	410000000	3.72706e+08
AT-III	ANT3_HUMAN	ERnegDRpos	75	410000000	3.72706e+08
AT-III	ANT3_HUMAN	ERnegDRpos	38	410000000	3.23012e+08
AT-III	ANT3_HUMAN	ERposDRpos	65	420000000	2.61229e+08
AT-III	ANT3_HUMAN	ERnegDRpos	5	420000000	413612500
AT-III	ANT3_HUMAN	ERnegDRpos	49	420000000	5.39495e+08
AT-III	ANT3_HUMAN	ERnegDRneg	48	420000000	5.73798e+08
AT-III	ANT3_HUMAN	ERposDRpos	57	440000000	3.71407e+08
AT-III	ANT3_HUMAN	ERposDRpos	42	440000000	415976000
AT-III	ANT3_HUMAN	ERnegDRpos	13	450000000	4.83443e+08
AT-III	ANT3_HUMAN	ERnegDRpos	74	450000000	3.93917e+08
AT-III	ANT3_HUMAN	ERposDRpos	26	480000000	4.36338e+08
AT-III	ANT3_HUMAN	ERnegDRpos	19	480000000	5.15673e+08
AT-III	ANT3_HUMAN	ERnegDRneg	10	500000000	3.47574e+08
AT-III	ANT3_HUMAN	ERnegDRpos	62	510000000	8.25606e+08
AT-III	ANT3_HUMAN	ERposDRneg	68	510000000	3.17207e+08
AT-III	ANT3_HUMAN	ERnegDRneg	54	560000000	5.09062e+08
AT-III	ANT3_HUMAN	ERposDRneg	24	570000000	449065000
AT-III	ANT3_HUMAN	ERnegDRpos	80	580000000	6.99403e+08
AT-III	ANT3_HUMAN	ERnegDRneg	63	590000000	4.8085e+08
AT-III	ANT3_HUMAN	ERnegDRneg	20	600000000	4.17088e+08
AT-III	ANT3_HUMAN	ERnegDRneg	69	620000000	4.88457e+08
AT-III	ANT3_HUMAN	ERnegDRneg	23	670000000	6.5981e+08
AT-III	ANT3_HUMAN	ERposDRpos	59	720000000	567240000
AT-III	ANT3_HUMAN	ERposDRpos	60	790000000	7.1814e+08
AT-III	ANT3_HUMAN	ERnegDRpos	9	790000000	9.33583e+08
AT-III	ANT3_HUMAN	ERposDRpos	43	870000000	428384375
AT-III	ANT3_HUMAN	ERposDRneg	47	930000000	9.99116e+08
AT-III	ANT3_HUMAN	ERnegDRpos	50	980000000	827225000
AT-III	ANT3_HUMAN	ERposDRpos	53	1000000000	472700000
AT-III	ANT3_HUMAN	ERnegDRpos	46	1100000000	448250000
AT-III	ANT3_HUMAN	ERposDRneg	55	1300000000	1181750000
AT-III	ANT3_HUMAN	ERnegDRneg	56	1300000000	1.02418e+09
AT-III	ANT3_HUMAN	ERposDRpos	44	2900000000	1.34395e+09
ANTXR1	ANTR1_HUMAN	ERposDRneg	14	2300000	2.47093e+06
ANTXR1	ANTR1_HUMAN	ERnegDRneg	51	2500000	2.11027e+06
AOC3	AOC3_HUMAN	ERposDRneg	39	260000	2363500
AOC3	AOC3_HUMAN	ERposDRneg	67	400000	4727000
AOC3	AOC3_HUMAN	ERposDRpos	77	1100000	8.12453e+06
AOC3	AOC3_HUMAN	ERposDRpos	79	1500000	3.69297e+06
AOC3	AOC3_HUMAN	ERposDRneg	28	2100000	3.57076e+06
AOC3	AOC3_HUMAN	ERposDRneg	36	2800000	2363500
AOC3	AOC3_HUMAN	ERnegDRneg	72	3600000	4.94686e+06
AOC3	AOC3_HUMAN	ERposDRpos	17	3800000	4.08241e+06
AOC3	AOC3_HUMAN	ERnegDRneg	32	3900000	5.3591e+06
AOC3	AOC3_HUMAN	ERnegDRneg	18	4200000	5.01348e+06
AOC3	AOC3_HUMAN	ERposDRneg	6	4500000	5.84382e+06
AOC3	AOC3_HUMAN	ERposDRpos	65	5200000	3.23426e+06
AOC3	AOC3_HUMAN	ERposDRneg	33	5300000	4.47377e+06
AOC3	AOC3_HUMAN	ERnegDRneg	73	6700000	4.79862e+06
AOC3	AOC3_HUMAN	ERposDRneg	24	7000000	5.51483e+06
AOC3	AOC3_HUMAN	ERposDRneg	15	7000000	6.36327e+06
AOC3	AOC3_HUMAN	ERposDRpos	37	7700000	9099475
AOC3	AOC3_HUMAN	ERposDRneg	30	9200000	9.06008e+06
AOC3	AOC3_HUMAN	ERposDRpos	35	11000000	1.52038e+07
AOC3	AOC3_HUMAN	ERnegDRneg	1	12000000	1.4397e+07
AOC3	AOC3_HUMAN	ERnegDRneg	48	12000000	1.63942e+07
AOC3	AOC3_HUMAN	ERposDRpos	60	12000000	1.09085e+07
AOC3	AOC3_HUMAN	ERnegDRpos	21	14000000	1.88006e+07
AOC3	AOC3_HUMAN	ERposDRneg	52	19000000	2.46739e+07
AOC3	AOC3_HUMAN	ERnegDRpos	38	20000000	1.57567e+07
AOC3	AOC3_HUMAN	ERposDRpos	45	20000000	1.96958e+07
AOC3	AOC3_HUMAN	ERnegDRpos	62	20000000	3.23767e+07
AOC3	AOC3_HUMAN	ERposDRneg	34	24000000	2.57836e+07
AOC3	AOC3_HUMAN	ERposDRneg	41	25000000	2.46198e+07
AOC3	AOC3_HUMAN	ERnegDRneg	69	27000000	21271500
AOC3	AOC3_HUMAN	ERposDRpos	27	30000000	3.6176e+07
AOC3	AOC3_HUMAN	ERposDRneg	58	30000000	7.2352e+07
AOC3	AOC3_HUMAN	ERnegDRneg	51	30000000	2.53232e+07
AOC3	AOC3_HUMAN	ERnegDRpos	16	32000000	2.22447e+07
AOC3	AOC3_HUMAN	ERposDRneg	68	32000000	1.99032e+07
AOC3	AOC3_HUMAN	ERposDRpos	26	32000000	2.90892e+07
AOC3	AOC3_HUMAN	ERnegDRpos	19	33000000	35452500
AOC3	AOC3_HUMAN	ERnegDRneg	54	34000000	3.09073e+07
AOC3	AOC3_HUMAN	ERnegDRneg	61	35000000	3.44677e+07
AOC3	AOC3_HUMAN	ERposDRneg	14	37000000	3.97498e+07
AOC3	AOC3_HUMAN	ERposDRpos	57	38000000	3.20761e+07
AOC3	AOC3_HUMAN	ERnegDRneg	10	43000000	2.98913e+07
AOC3	AOC3_HUMAN	ERnegDRneg	4	44000000	4.33308e+07
AOC3	AOC3_HUMAN	ERposDRpos	3	45000000	4.09067e+07
AOC3	AOC3_HUMAN	ERposDRneg	66	47000000	8.0496e+07
AOC3	AOC3_HUMAN	ERnegDRpos	50	48000000	4.05171e+07
AOC3	AOC3_HUMAN	ERnegDRneg	11	54000000	4.90881e+07
AOC3	AOC3_HUMAN	ERnegDRpos	5	56000000	5.51483e+07
AOC3	AOC3_HUMAN	ERnegDRneg	23	57000000	56133125
AOC3	AOC3_HUMAN	ERnegDRneg	56	63000000	49633500
AOC3	AOC3_HUMAN	ERnegDRpos	25	65000000	9.14449e+07
AOC3	AOC3_HUMAN	ERposDRpos	40	74000000	7.28746e+07
AOC3	AOC3_HUMAN	ERnegDRpos	46	80000000	3.26e+07
AOC3	AOC3_HUMAN	ERposDRneg	47	95000000	1.0206e+08
AOC3	AOC3_HUMAN	ERnegDRpos	8	96000000	8.72677e+07
AOC3	AOC3_HUMAN	ERnegDRpos	75	98000000	8.90858e+07
AOC3	AOC3_HUMAN	ERposDRpos	71	110000000	1.44436e+08
AOC3	AOC3_HUMAN	ERnegDRneg	20	110000000	7.64662e+07
AOC3	AOC3_HUMAN	ERposDRpos	44	110000000	5.09775e+07
AOC3	AOC3_HUMAN	ERposDRpos	53	110000000	51997000
AOC3	AOC3_HUMAN	ERnegDRpos	2	110000000	1.35409e+08
AOC3	AOC3_HUMAN	ERnegDRpos	7	110000000	7.64662e+07
AOC3	AOC3_HUMAN	ERnegDRpos	13	130000000	1.39661e+08
AOC3	AOC3_HUMAN	ERnegDRpos	9	140000000	165445000
AOC3	AOC3_HUMAN	ERnegDRneg	22	150000000	1.61148e+08
AOC3	AOC3_HUMAN	ERnegDRpos	80	150000000	1.8088e+08
AOC3	AOC3_HUMAN	ERnegDRneg	31	200000000	2.99177e+08
AOC3	AOC3_HUMAN	ERposDRpos	70	220000000	2.59985e+08
AOC3	AOC3_HUMAN	ERposDRpos	59	230000000	1.81202e+08
AOC3	AOC3_HUMAN	ERnegDRneg	63	230000000	187450000
AOC3	AOC3_HUMAN	ERnegDRneg	12	280000000	4.26955e+08
AOC3	AOC3_HUMAN	ERposDRpos	42	320000000	302528000
AOC3	AOC3_HUMAN	ERposDRpos	29	510000000	602692500
AOC3	AOC3_HUMAN	ERnegDRpos	78	690000000	1087210000
AOC3	AOC3_HUMAN	ERnegDRpos	49	1100000000	1.41296e+09
APMAP	APMAP_HUMAN	ERposDRneg	67	100000	1181750
APMAP	APMAP_HUMAN	ERposDRpos	77	150000	1.10789e+06
APMAP	APMAP_HUMAN	ERposDRpos	17	570000	612361
APMAP	APMAP_HUMAN	ERnegDRpos	76	600000	5672400
APMAP	APMAP_HUMAN	ERnegDRpos	74	1100000	962907
APMAP	APMAP_HUMAN	ERposDRneg	58	1200000	2.89408e+06
APMAP	APMAP_HUMAN	ERposDRneg	39	1800000	1.63627e+07
APMAP	APMAP_HUMAN	ERnegDRpos	16	3100000	2.15496e+06
APMAP	APMAP_HUMAN	ERposDRneg	15	3600000	3.27254e+06
APMAP	APMAP_HUMAN	ERnegDRneg	10	4300000	2.98913e+06
APMAP	APMAP_HUMAN	ERposDRpos	40	4800000	4727000
APMAP	APMAP_HUMAN	ERposDRneg	52	5500000	7.14245e+06
APMAP	APMAP_HUMAN	ERnegDRpos	50	5600000	4727000
APMAP	APMAP_HUMAN	ERnegDRpos	7	6700000	4.65749e+06
APMAP	APMAP_HUMAN	ERposDRneg	34	7300000	7.84252e+06
APMAP	APMAP_HUMAN	ERposDRneg	24	7800000	6145100
APMAP	APMAP_HUMAN	ERposDRpos	27	8100000	9.76753e+06
APMAP	APMAP_HUMAN	ERposDRneg	66	9000000	1.54141e+07
APMAP	APMAP_HUMAN	ERposDRneg	36	9600000	8.10343e+06
APMAP	APMAP_HUMAN	ERnegDRneg	63	12000000	9780000
APMAP	APMAP_HUMAN	ERposDRpos	3	12000000	1.09085e+07
APMAP	APMAP_HUMAN	ERnegDRpos	80	12000000	1.44704e+07
APMAP	APMAP_HUMAN	ERposDRpos	79	12000000	29543750
APMAP	APMAP_HUMAN	ERposDRneg	6	13000000	1.68821e+07
APMAP	APMAP_HUMAN	ERnegDRpos	9	14000000	1.65445e+07
APMAP	APMAP_HUMAN	ERposDRpos	44	14000000	6.48804e+06
APMAP	APMAP_HUMAN	ERnegDRneg	22	15000000	1.61148e+07
APMAP	APMAP_HUMAN	ERposDRneg	64	16000000	2.4241e+07
APMAP	APMAP_HUMAN	ERnegDRneg	1	17000000	2.03957e+07
APMAP	APMAP_HUMAN	ERposDRpos	53	17000000	8035900
APMAP	APMAP_HUMAN	ERnegDRpos	21	17000000	2.28293e+07
APMAP	APMAP_HUMAN	ERposDRpos	35	19000000	2.62611e+07
APMAP	APMAP_HUMAN	ERnegDRneg	4	19000000	1.8711e+07
APMAP	APMAP_HUMAN	ERposDRpos	37	19000000	22453250
APMAP	APMAP_HUMAN	ERnegDRpos	5	21000000	20680625
APMAP	APMAP_HUMAN	ERnegDRneg	73	21000000	1.50405e+07
APMAP	APMAP_HUMAN	ERnegDRneg	23	21000000	20680625
APMAP	APMAP_HUMAN	ERnegDRpos	13	24000000	2.57836e+07
APMAP	APMAP_HUMAN	ERposDRpos	26	24000000	2.18169e+07
APMAP	APMAP_HUMAN	ERposDRneg	30	26000000	2.56046e+07
APMAP	APMAP_HUMAN	ERposDRpos	65	27000000	1.67933e+07
APMAP	APMAP_HUMAN	ERnegDRpos	19	28000000	3.00809e+07
APMAP	APMAP_HUMAN	ERnegDRpos	62	30000000	4.85651e+07
APMAP	APMAP_HUMAN	ERnegDRpos	38	31000000	2.44228e+07
APMAP	APMAP_HUMAN	ERnegDRneg	20	31000000	2.15496e+07
APMAP	APMAP_HUMAN	ERnegDRpos	46	32000000	13040000
APMAP	APMAP_HUMAN	ERposDRneg	33	34000000	2.86996e+07
APMAP	APMAP_HUMAN	ERnegDRneg	69	35000000	2.75742e+07
APMAP	APMAP_HUMAN	ERnegDRneg	31	36000000	5.38519e+07
APMAP	APMAP_HUMAN	ERnegDRpos	25	36000000	5.06464e+07
APMAP	APMAP_HUMAN	ERposDRpos	45	36000000	35452500
APMAP	APMAP_HUMAN	ERposDRpos	29	36000000	42543000
APMAP	APMAP_HUMAN	ERnegDRpos	49	37000000	4.75269e+07
APMAP	APMAP_HUMAN	ERposDRpos	59	38000000	2.99377e+07
APMAP	APMAP_HUMAN	ERposDRneg	14	41000000	4.4047e+07
APMAP	APMAP_HUMAN	ERnegDRpos	8	41000000	3.72706e+07
APMAP	APMAP_HUMAN	ERnegDRneg	56	42000000	3.3089e+07
APMAP	APMAP_HUMAN	ERnegDRneg	11	43000000	3.90887e+07
APMAP	APMAP_HUMAN	ERposDRneg	47	43000000	4.61957e+07
APMAP	APMAP_HUMAN	ERposDRneg	68	46000000	2.86108e+07
APMAP	APMAP_HUMAN	ERnegDRneg	61	47000000	4.62852e+07
APMAP	APMAP_HUMAN	ERposDRneg	41	48000000	47270000
APMAP	APMAP_HUMAN	ERnegDRneg	48	48000000	6.55769e+07
APMAP	APMAP_HUMAN	ERposDRneg	28	50000000	8.5018e+07
APMAP	APMAP_HUMAN	ERposDRpos	71	58000000	7.61572e+07
APMAP	APMAP_HUMAN	ERposDRpos	42	59000000	55778600
APMAP	APMAP_HUMAN	ERposDRpos	70	60000000	70905000
APMAP	APMAP_HUMAN	ERnegDRneg	12	60000000	9.14903e+07
APMAP	APMAP_HUMAN	ERnegDRneg	18	61000000	7.28149e+07
APMAP	APMAP_HUMAN	ERnegDRneg	32	62000000	8.51959e+07
APMAP	APMAP_HUMAN	ERnegDRneg	51	66000000	5.57111e+07
APMAP	APMAP_HUMAN	ERnegDRpos	78	80000000	1.26053e+08
APMAP	APMAP_HUMAN	ERnegDRneg	54	82000000	7.45412e+07
APMAP	APMAP_HUMAN	ERposDRpos	57	100000000	8.44107e+07
APMAP	APMAP_HUMAN	ERposDRpos	60	110000000	9.99942e+07
APMAP	APMAP_HUMAN	ERnegDRneg	72	150000000	2.06119e+08
APMAP	APMAP_HUMAN	ERposDRpos	43	150000000	73859375
APOB	APOB_HUMAN	ERposDRneg	39	340000	3.09073e+06
APOB	APOB_HUMAN	ERnegDRneg	73	550000	393917
APOB	APOB_HUMAN	ERnegDRpos	50	720000	607757
APOB	APOB_HUMAN	ERposDRneg	58	980000	2363500
APOB	APOB_HUMAN	ERnegDRneg	61	2100000	2.06806e+06
APOB	APOB_HUMAN	ERposDRpos	60	4600000	4.18158e+06
APOB	APOB_HUMAN	ERposDRneg	34	4700000	5.0493e+06
APOB	APOB_HUMAN	ERposDRpos	65	5000000	3.10987e+06
APOB	APOB_HUMAN	ERposDRpos	70	5200000	6145100
APOB	APOB_HUMAN	ERnegDRpos	78	5900000	9.29643e+06
APOB	APOB_HUMAN	ERnegDRneg	69	7100000	5.59362e+06
APOB	APOB_HUMAN	ERnegDRneg	4	7300000	7.18898e+06
APOB	APOB_HUMAN	ERnegDRpos	21	8200000	1.10118e+07
APOB	APOB_HUMAN	ERnegDRneg	1	8300000	9.95789e+06
APOB	APOB_HUMAN	ERposDRpos	45	8500000	8.37073e+06
APOB	APOB_HUMAN	ERnegDRneg	63	8800000	7.172e+06
APOB	APOB_HUMAN	ERposDRneg	30	9500000	9.35552e+06
APOB	APOB_HUMAN	ERnegDRpos	38	9700000	7.64198e+06
APOB	APOB_HUMAN	ERposDRpos	40	9800000	9.65096e+06
APOB	APOB_HUMAN	ERposDRpos	27	9800000	11817500
APOB	APOB_HUMAN	ERnegDRneg	22	9900000	10635750
APOB	APOB_HUMAN	ERposDRpos	35	10000000	1.38216e+07
APOB	APOB_HUMAN	ERposDRpos	37	12000000	1.4181e+07
APOB	APOB_HUMAN	ERposDRneg	66	12000000	2.05522e+07
APOB	APOB_HUMAN	ERposDRneg	28	13000000	2.21047e+07
APOB	APOB_HUMAN	ERnegDRpos	74	13000000	1.13798e+07
APOB	APOB_HUMAN	ERposDRneg	14	13000000	1.39661e+07
APOB	APOB_HUMAN	ERposDRneg	33	14000000	11817500
APOB	APOB_HUMAN	ERposDRpos	59	14000000	1.10297e+07
APOB	APOB_HUMAN	ERposDRpos	29	14000000	1.65445e+07
APOB	APOB_HUMAN	ERnegDRneg	12	14000000	2.13477e+07
APOB	APOB_HUMAN	ERposDRneg	41	14000000	1.37871e+07
APOB	APOB_HUMAN	ERposDRneg	15	16000000	1.45446e+07
APOB	APOB_HUMAN	ERposDRpos	79	16000000	3.93917e+07
APOB	APOB_HUMAN	ERnegDRpos	49	17000000	2.18367e+07
APOB	APOB_HUMAN	ERnegDRpos	8	17000000	1.54537e+07
APOB	APOB_HUMAN	ERnegDRpos	46	18000000	7.335e+06
APOB	APOB_HUMAN	ERnegDRneg	72	18000000	2.47343e+07
APOB	APOB_HUMAN	ERnegDRpos	13	18000000	1.93377e+07
APOB	APOB_HUMAN	ERnegDRpos	62	19000000	3.07579e+07
APOB	APOB_HUMAN	ERnegDRpos	19	20000000	2.14864e+07
APOB	APOB_HUMAN	ERposDRpos	71	21000000	2.75742e+07
APOB	APOB_HUMAN	ERnegDRpos	7	21000000	1.45981e+07
APOB	APOB_HUMAN	ERnegDRpos	2	24000000	29543750
APOB	APOB_HUMAN	ERposDRpos	26	24000000	2.18169e+07
APOB	APOB_HUMAN	ERnegDRpos	16	25000000	1.73787e+07
APOB	APOB_HUMAN	ERposDRneg	64	26000000	3.93917e+07
APOB	APOB_HUMAN	ERposDRpos	42	27000000	25525800
APOB	APOB_HUMAN	ERnegDRpos	80	27000000	3.25584e+07
APOB	APOB_HUMAN	ERposDRpos	17	28000000	3.00809e+07
APOB	APOB_HUMAN	ERnegDRneg	31	30000000	4.48766e+07
APOB	APOB_HUMAN	ERnegDRpos	5	31000000	3.05285e+07
APOB	APOB_HUMAN	ERnegDRneg	51	31000000	2.61673e+07
APOB	APOB_HUMAN	ERnegDRneg	48	32000000	4.37179e+07
APOB	APOB_HUMAN	ERnegDRneg	10	33000000	2.29399e+07
APOB	APOB_HUMAN	ERnegDRneg	18	34000000	4.05854e+07
APOB	APOB_HUMAN	ERnegDRneg	11	35000000	3.18163e+07
APOB	APOB_HUMAN	ERposDRpos	3	37000000	3.36344e+07
APOB	APOB_HUMAN	ERposDRpos	57	40000000	3.37643e+07
APOB	APOB_HUMAN	ERnegDRneg	23	43000000	4.2346e+07
APOB	APOB_HUMAN	ERposDRpos	44	43000000	1.99275e+07
APOB	APOB_HUMAN	ERnegDRpos	75	45000000	4.09067e+07
APOB	APOB_HUMAN	ERposDRneg	36	47000000	3.9673e+07
APOB	APOB_HUMAN	ERposDRneg	47	50000000	5.37159e+07
APOB	APOB_HUMAN	ERnegDRpos	25	53000000	7.45628e+07
APOB	APOB_HUMAN	ERposDRneg	6	58000000	7.53203e+07
APOB	APOB_HUMAN	ERposDRneg	52	58000000	7.53203e+07
APOB	APOB_HUMAN	ERposDRpos	53	61000000	28834700
APOB	APOB_HUMAN	ERnegDRneg	32	66000000	9.06924e+07
APOB	APOB_HUMAN	ERnegDRneg	54	70000000	6.36327e+07
APOB	APOB_HUMAN	ERnegDRneg	56	77000000	6.06632e+07
APOB	APOB_HUMAN	ERnegDRpos	9	91000000	107539250
APOB	APOB_HUMAN	ERposDRneg	55	91000000	82722500
APOB	APOB_HUMAN	ERposDRneg	24	96000000	75632000
APOB	APOB_HUMAN	ERposDRneg	68	160000000	9.95158e+07
APOB	APOB_HUMAN	ERnegDRneg	20	170000000	118175000
APOB	APOB_HUMAN	ERposDRpos	43	210000000	103403125
APOD	APOD_HUMAN	ERposDRneg	39	2200000	1.99988e+07
APOD	APOD_HUMAN	ERposDRneg	67	5500000	6.49963e+07
APOD	APOD_HUMAN	ERposDRneg	33	18000000	1.51939e+07
APOD	APOD_HUMAN	ERposDRneg	34	45000000	4.83443e+07
APOD	APOD_HUMAN	ERnegDRneg	72	72000000	9.89372e+07
APOD	APOD_HUMAN	ERposDRneg	14	77000000	82722500
APOD	APOD_HUMAN	ERposDRpos	35	82000000	1.13337e+08
APOD	APOD_HUMAN	ERposDRpos	71	83000000	1.08984e+08
APOD	APOD_HUMAN	ERnegDRneg	4	85000000	8.37073e+07
APOD	APOD_HUMAN	ERnegDRpos	74	91000000	7.96587e+07
APOD	APOD_HUMAN	ERnegDRpos	21	94000000	1.26232e+08
APOD	APOD_HUMAN	ERposDRneg	6	97000000	1.25967e+08
APOD	APOD_HUMAN	ERposDRpos	40	100000000	9.84792e+07
APOD	APOD_HUMAN	ERnegDRpos	38	110000000	8.66617e+07
APOD	APOD_HUMAN	ERposDRpos	70	120000000	141810000
APOD	APOD_HUMAN	ERposDRpos	65	130000000	8.08566e+07
APOD	APOD_HUMAN	ERnegDRpos	7	150000000	1.04272e+08
APOD	APOD_HUMAN	ERnegDRpos	78	150000000	2.3635e+08
APOD	APOD_HUMAN	ERnegDRpos	75	150000000	1.36356e+08
APOD	APOD_HUMAN	ERposDRpos	29	150000000	177262500
APOD	APOD_HUMAN	ERnegDRpos	2	160000000	1.96958e+08
APOD	APOD_HUMAN	ERnegDRpos	50	170000000	1.43498e+08
APOD	APOD_HUMAN	ERnegDRpos	76	170000000	1607180000
APOD	APOD_HUMAN	ERposDRneg	15	190000000	1.72717e+08
APOD	APOD_HUMAN	ERposDRneg	36	190000000	1.6038e+08
APOD	APOD_HUMAN	ERnegDRpos	19	200000000	2.14864e+08
APOD	APOD_HUMAN	ERnegDRneg	61	210000000	206806250
APOD	APOD_HUMAN	ERposDRpos	79	220000000	5.41635e+08
APOD	APOD_HUMAN	ERnegDRneg	31	240000000	3.59013e+08
APOD	APOD_HUMAN	ERnegDRneg	54	260000000	236350000
APOD	APOD_HUMAN	ERposDRneg	58	300000000	7.2352e+08
APOD	APOD_HUMAN	ERnegDRpos	49	310000000	3.98198e+08
APOD	APOD_HUMAN	ERnegDRneg	23	310000000	3.05285e+08
APOD	APOD_HUMAN	ERposDRpos	43	320000000	1.57567e+08
APOD	APOD_HUMAN	ERposDRpos	57	320000000	2.70114e+08
APOD	APOD_HUMAN	ERnegDRneg	32	350000000	4.80945e+08
APOD	APOD_HUMAN	ERnegDRpos	8	380000000	3.45435e+08
APOD	APOD_HUMAN	ERnegDRneg	69	390000000	307255000
APOD	APOD_HUMAN	ERnegDRneg	73	420000000	3.00809e+08
APOD	APOD_HUMAN	ERposDRpos	77	430000000	3175953125
APOD	APOD_HUMAN	ERposDRpos	37	460000000	543605000
APOD	APOD_HUMAN	ERposDRneg	28	520000000	8.84187e+08
APOD	APOD_HUMAN	ERnegDRpos	9	600000000	709050000
APOD	APOD_HUMAN	ERnegDRneg	11	620000000	5.63604e+08
APOD	APOD_HUMAN	ERnegDRpos	62	630000000	1.01987e+09
APOD	APOD_HUMAN	ERnegDRneg	18	670000000	7.9977e+08
APOD	APOD_HUMAN	ERnegDRpos	25	700000000	9.84792e+08
APOD	APOD_HUMAN	ERposDRneg	41	700000000	6.89354e+08
APOD	APOD_HUMAN	ERnegDRneg	22	720000000	7.73509e+08
APOD	APOD_HUMAN	ERposDRneg	66	750000000	1.28451e+09
APOD	APOD_HUMAN	ERposDRneg	52	770000000	9.99942e+08
APOD	APOD_HUMAN	ERposDRneg	24	800000000	6.30267e+08
APOD	APOD_HUMAN	ERposDRneg	64	820000000	1.24235e+09
APOD	APOD_HUMAN	ERnegDRpos	13	830000000	8.91684e+08
APOD	APOD_HUMAN	ERposDRneg	47	910000000	9.7763e+08
APOD	APOD_HUMAN	ERposDRpos	53	1000000000	472700000
APOD	APOD_HUMAN	ERposDRpos	60	1000000000	9.09038e+08
APOD	APOD_HUMAN	ERnegDRneg	56	1300000000	1.02418e+09
APOD	APOD_HUMAN	ERnegDRneg	12	1300000000	1.98229e+09
APOD	APOD_HUMAN	ERnegDRneg	63	1400000000	1141000000
APOD	APOD_HUMAN	ERposDRpos	44	1800000000	8.34176e+08
APOD	APOD_HUMAN	ERnegDRneg	48	1900000000	2.59575e+09
APOD	APOD_HUMAN	ERposDRpos	17	2600000000	2.79323e+09
APOD	APOD_HUMAN	ERnegDRneg	51	3300000000	2.78555e+09
APOD	APOD_HUMAN	ERposDRneg	30	3700000000	3.64373e+09
APOD	APOD_HUMAN	ERnegDRpos	80	4100000000	4.94406e+09
APOD	APOD_HUMAN	ERposDRneg	55	4400000000	3.99977e+09
APOD	APOD_HUMAN	ERnegDRpos	5	4900000000	4.82548e+09
APOD	APOD_HUMAN	ERposDRpos	3	5000000000	4.54519e+09
APOD	APOD_HUMAN	ERnegDRneg	10	5300000000	3.68428e+09
APOD	APOD_HUMAN	ERposDRpos	45	7000000000	6.89354e+09
APOD	APOD_HUMAN	ERposDRpos	59	7100000000	5.59362e+09
APOD	APOD_HUMAN	ERposDRpos	26	9000000000	8.18135e+09
APOD	APOD_HUMAN	ERposDRpos	42	15000000000	14181000000
APOD	APOD_HUMAN	ERnegDRneg	20	16000000000	1.11224e+10
APOD	APOD_HUMAN	ERposDRpos	27	17000000000	2.04997e+10
APOD	APOD_HUMAN	ERposDRneg	68	21000000000	1.30614e+10
APOD	APOD_HUMAN	ERnegDRpos	16	46000000000	3.19768e+10
APOD	APOD_HUMAN	ERnegDRneg	1	59000000000	7.0785e+10
APOD	APOD_HUMAN	ERnegDRpos	46	150000000000	6.1125e+10
APOH	APOH_HUMAN	ERposDRneg	67	2800000	3.3089e+07
APOH	APOH_HUMAN	ERnegDRpos	76	6200000	5.86148e+07
APOH	APOH_HUMAN	ERposDRneg	39	8800000	7.99954e+07
APOH	APOH_HUMAN	ERposDRpos	77	47000000	3.47139e+08
APOH	APOH_HUMAN	ERposDRneg	66	130000000	2.22649e+08
APOH	APOH_HUMAN	ERposDRpos	45	200000000	1.96958e+08
APOH	APOH_HUMAN	ERposDRneg	52	220000000	2.85698e+08
APOH	APOH_HUMAN	ERposDRneg	58	280000000	6.75286e+08
APOH	APOH_HUMAN	ERposDRneg	36	310000000	2.61673e+08
APOH	APOH_HUMAN	ERposDRpos	40	520000000	5.12092e+08
APOH	APOH_HUMAN	ERposDRneg	28	530000000	9.01191e+08
APOH	APOH_HUMAN	ERposDRneg	34	720000000	7.73509e+08
APOH	APOH_HUMAN	ERposDRpos	70	790000000	9.33583e+08
APOH	APOH_HUMAN	ERnegDRpos	80	850000000	1.02499e+09
APOH	APOH_HUMAN	ERnegDRpos	25	880000000	1.23802e+09
APOH	APOH_HUMAN	ERnegDRneg	12	900000000	1.37235e+09
APOH	APOH_HUMAN	ERnegDRneg	48	920000000	1.25689e+09
APOH	APOH_HUMAN	ERnegDRpos	49	920000000	1181750000
APOH	APOH_HUMAN	ERposDRpos	37	1000000000	1181750000
APOH	APOH_HUMAN	ERposDRneg	64	1100000000	1.66657e+09
APOH	APOH_HUMAN	ERposDRpos	35	1100000000	1.52038e+09
APOH	APOH_HUMAN	ERnegDRneg	1	1100000000	1.31972e+09
APOH	APOH_HUMAN	ERnegDRpos	2	1100000000	1.35409e+09
APOH	APOH_HUMAN	ERnegDRneg	63	1200000000	9.78e+08
APOH	APOH_HUMAN	ERposDRpos	79	1200000000	2954375000
APOH	APOH_HUMAN	ERnegDRpos	78	1300000000	2.04837e+09
APOH	APOH_HUMAN	ERnegDRpos	38	1300000000	1.02418e+09
APOH	APOH_HUMAN	ERnegDRneg	31	1400000000	2.09424e+09
APOH	APOH_HUMAN	ERposDRpos	60	1400000000	1.27265e+09
APOH	APOH_HUMAN	ERnegDRpos	62	1400000000	2.26637e+09
APOH	APOH_HUMAN	ERposDRpos	42	1400000000	1323560000
APOH	APOH_HUMAN	ERnegDRneg	4	1500000000	1477187500
APOH	APOH_HUMAN	ERposDRpos	27	1500000000	1.8088e+09
APOH	APOH_HUMAN	ERposDRneg	33	1500000000	1.26616e+09
APOH	APOH_HUMAN	ERposDRpos	59	1500000000	1181750000
APOH	APOH_HUMAN	ERnegDRneg	72	1500000000	2.06119e+09
APOH	APOH_HUMAN	ERposDRneg	24	1500000000	1181750000
APOH	APOH_HUMAN	ERposDRpos	26	1700000000	1.54537e+09
APOH	APOH_HUMAN	ERposDRpos	71	1800000000	2363500000
APOH	APOH_HUMAN	ERnegDRpos	50	1800000000	1.51939e+09
APOH	APOH_HUMAN	ERnegDRpos	74	1900000000	1.6632e+09
APOH	APOH_HUMAN	ERposDRpos	17	1900000000	2.0412e+09
APOH	APOH_HUMAN	ERposDRneg	41	1900000000	1.8711e+09
APOH	APOH_HUMAN	ERnegDRneg	10	1900000000	1.32078e+09
APOH	APOH_HUMAN	ERnegDRpos	21	1900000000	2.55151e+09
APOH	APOH_HUMAN	ERposDRneg	15	1900000000	1.72717e+09
APOH	APOH_HUMAN	ERposDRpos	3	2000000000	1.81808e+09
APOH	APOH_HUMAN	ERnegDRpos	19	2000000000	2.14864e+09
APOH	APOH_HUMAN	ERposDRpos	29	2000000000	2363500000
APOH	APOH_HUMAN	ERnegDRpos	5	2000000000	1.96958e+09
APOH	APOH_HUMAN	ERnegDRneg	61	2100000000	2068062500
APOH	APOH_HUMAN	ERposDRneg	47	2100000000	2.25607e+09
APOH	APOH_HUMAN	ERnegDRpos	16	2200000000	1.52932e+09
APOH	APOH_HUMAN	ERnegDRpos	13	2200000000	2363500000
APOH	APOH_HUMAN	ERposDRpos	57	2300000000	1.94145e+09
APOH	APOH_HUMAN	ERnegDRpos	75	2400000000	2.18169e+09
APOH	APOH_HUMAN	ERposDRneg	14	2400000000	2.57836e+09
APOH	APOH_HUMAN	ERnegDRneg	51	2400000000	2.02586e+09
APOH	APOH_HUMAN	ERnegDRpos	7	2400000000	1.66835e+09
APOH	APOH_HUMAN	ERnegDRpos	9	2500000000	2954375000
APOH	APOH_HUMAN	ERnegDRneg	22	2500000000	2.6858e+09
APOH	APOH_HUMAN	ERposDRneg	68	2500000000	1.55493e+09
APOH	APOH_HUMAN	ERposDRpos	65	2600000000	1.61713e+09
APOH	APOH_HUMAN	ERnegDRneg	18	2600000000	3.10359e+09
APOH	APOH_HUMAN	ERnegDRpos	46	2600000000	1.0595e+09
APOH	APOH_HUMAN	ERnegDRpos	8	2700000000	2.4544e+09
APOH	APOH_HUMAN	ERnegDRneg	69	2700000000	2.12715e+09
APOH	APOH_HUMAN	ERnegDRneg	73	2800000000	2.00539e+09
APOH	APOH_HUMAN	ERnegDRneg	23	3000000000	2954375000
APOH	APOH_HUMAN	ERposDRneg	30	3000000000	2954375000
APOH	APOH_HUMAN	ERnegDRneg	54	3100000000	2.81802e+09
APOH	APOH_HUMAN	ERnegDRneg	56	3200000000	2.52107e+09
APOH	APOH_HUMAN	ERnegDRneg	32	3300000000	4.53462e+09
APOH	APOH_HUMAN	ERposDRneg	55	3500000000	3.18163e+09
APOH	APOH_HUMAN	ERnegDRneg	11	3500000000	3.18163e+09
APOH	APOH_HUMAN	ERposDRpos	44	4600000000	2.13178e+09
APOH	APOH_HUMAN	ERposDRneg	6	5100000000	6.62299e+09
APOH	APOH_HUMAN	ERposDRpos	43	5700000000	2806656250
APOH	APOH_HUMAN	ERposDRpos	53	6000000000	2836200000
APOH	APOH_HUMAN	ERnegDRneg	20	6400000000	4.44894e+09
ARSD	ARSD_HUMAN	ERnegDRneg	32	890000	1.22297e+06
ARSD	ARSD_HUMAN	ERposDRpos	60	1700000	1.54537e+06
SMPDL3A	ASM3A_HUMAN	ERposDRpos	45	610000	600723
SMPDL3A	ASM3A_HUMAN	ERnegDRneg	72	1400000	1.92378e+06
SMPDL3A	ASM3A_HUMAN	ERnegDRneg	32	1400000	1.92378e+06
SMPDL3A	ASM3A_HUMAN	ERposDRpos	59	2500000	1.96958e+06
ASPH	ASPH_HUMAN	ERposDRneg	39	220000	1.99988e+06
ASPH	ASPH_HUMAN	ERposDRneg	58	570000	1.37469e+06
ASPH	ASPH_HUMAN	ERnegDRpos	13	650000	698307
ASPH	ASPH_HUMAN	ERnegDRneg	22	900000	966886
ASPH	ASPH_HUMAN	ERnegDRpos	50	900000	759696
ASPH	ASPH_HUMAN	ERnegDRpos	78	900000	1418100
ASPH	ASPH_HUMAN	ERposDRneg	52	920000	1.19474e+06
ASPH	ASPH_HUMAN	ERposDRpos	37	960000	1134480
ASPH	ASPH_HUMAN	ERposDRneg	66	1000000	1.71268e+06
ASPH	ASPH_HUMAN	ERnegDRpos	62	1400000	2.26637e+06
ASPH	ASPH_HUMAN	ERposDRpos	79	2100000	5.17016e+06
ASPH	ASPH_HUMAN	ERnegDRpos	80	2100000	2.53232e+06
ASPH	ASPH_HUMAN	ERnegDRpos	2	2200000	2.70818e+06
ASPH	ASPH_HUMAN	ERnegDRneg	20	2400000	1.66835e+06
ASPH	ASPH_HUMAN	ERposDRneg	66	2700000	4.62424e+06
ASPH	ASPH_HUMAN	ERnegDRpos	21	2900000	3.8944e+06
ASPH	ASPH_HUMAN	ERposDRpos	71	3000000	3.93917e+06
ASPH	ASPH_HUMAN	ERnegDRneg	61	3000000	2954375
ASPH	ASPH_HUMAN	ERnegDRneg	1	3200000	3.83919e+06
ASPH	ASPH_HUMAN	ERnegDRneg	31	3400000	5.08601e+06
ASPH	ASPH_HUMAN	ERposDRneg	47	3500000	3.76011e+06
ASPH	ASPH_HUMAN	ERposDRpos	26	3600000	3.27254e+06
ASPH	ASPH_HUMAN	ERnegDRneg	63	4700000	3.8305e+06
ASPH	ASPH_HUMAN	ERnegDRneg	56	4700000	3.70282e+06
ASPH	ASPH_HUMAN	ERposDRpos	45	4900000	4.82548e+06
ASPH	ASPH_HUMAN	ERnegDRneg	11	5100000	4.6361e+06
ASPH	ASPH_HUMAN	ERposDRpos	53	5300000	2505310
ASPH	ASPH_HUMAN	ERposDRneg	14	5700000	6.12361e+06
ASPH	ASPH_HUMAN	ERposDRpos	60	5700000	5.18152e+06
ASPH	ASPH_HUMAN	ERposDRpos	70	5800000	6854150
ASPH	ASPH_HUMAN	ERnegDRneg	32	5900000	8.10735e+06
ASPH	ASPH_HUMAN	ERposDRpos	44	5900000	2.73425e+06
ASPH	ASPH_HUMAN	ERposDRpos	57	6000000	5.06464e+06
ASPH	ASPH_HUMAN	ERnegDRneg	18	6000000	7.16212e+06
ASPH	ASPH_HUMAN	ERnegDRneg	4	6100000	6.00723e+06
ASPH	ASPH_HUMAN	ERnegDRpos	19	6100000	6.55334e+06
ASPH	ASPH_HUMAN	ERnegDRpos	8	6300000	5.72694e+06
ASPH	ASPH_HUMAN	ERposDRneg	28	7000000	1.19025e+07
ASPH	ASPH_HUMAN	ERnegDRneg	73	7500000	5.37159e+06
ASPH	ASPH_HUMAN	ERnegDRpos	25	7800000	1.09734e+07
ASPH	ASPH_HUMAN	ERposDRneg	64	7800000	11817500
ASPH	ASPH_HUMAN	ERposDRneg	68	8700000	5.41117e+06
ASPH	ASPH_HUMAN	ERposDRpos	43	8700000	4.28384e+06
ASPH	ASPH_HUMAN	ERposDRneg	55	9900000	8.99948e+06
ASPH	ASPH_HUMAN	ERnegDRneg	69	11000000	8.66617e+06
ASPH	ASPH_HUMAN	ERnegDRpos	49	11000000	1.41296e+07
ASPH	ASPH_HUMAN	ERnegDRneg	54	12000000	1.09085e+07
ASPH	ASPH_HUMAN	ERnegDRpos	78	13000000	2.04837e+07
ASPH	ASPH_HUMAN	ERnegDRpos	38	13000000	1.02418e+07
ASPH	ASPH_HUMAN	ERposDRpos	42	13000000	12290200
ASPH	ASPH_HUMAN	ERnegDRpos	21	13000000	1.74577e+07
ASPH	ASPH_HUMAN	ERposDRpos	59	13000000	1.02418e+07
ASPH	ASPH_HUMAN	ERposDRneg	41	14000000	1.37871e+07
ASPH	ASPH_HUMAN	ERnegDRneg	72	15000000	2.06119e+07
ASPH	ASPH_HUMAN	ERnegDRneg	48	17000000	2.32251e+07
ASPH	ASPH_HUMAN	ERnegDRneg	51	21000000	17726250
ASPH	ASPH_HUMAN	ERnegDRneg	12	23000000	3.50713e+07
ASPH	ASPH_HUMAN	ERnegDRpos	75	37000000	3.36344e+07
ASPH	ASPH_HUMAN	ERposDRpos	43	170000000	8.37073e+07
ATP1B1	AT1B1_HUMAN	ERposDRneg	58	250000	602934
ATP1B1	AT1B1_HUMAN	ERnegDRpos	9	890000	1.05176e+06
ATP1B1	AT1B1_HUMAN	ERposDRneg	36	1100000	928518
ATP1B1	AT1B1_HUMAN	ERposDRpos	40	1400000	1.37871e+06
ATP1B1	AT1B1_HUMAN	ERnegDRneg	63	2200000	1.793e+06
ATP1B1	AT1B1_HUMAN	ERnegDRpos	49	2500000	3.21128e+06
ATP1B1	AT1B1_HUMAN	ERposDRpos	17	3000000	3.22295e+06
ATP1B1	AT1B1_HUMAN	ERposDRpos	29	3800000	4490650
ATP1B1	AT1B1_HUMAN	ERposDRneg	6	4300000	5.58409e+06
ATP1B1	AT1B1_HUMAN	ERposDRneg	52	6200000	8.05148e+06
ATP1B1	AT1B1_HUMAN	ERposDRneg	34	6600000	7.0905e+06
ATP1B1	AT1B1_HUMAN	ERnegDRneg	11	7200000	6.54508e+06
ATP1B1	AT1B1_HUMAN	ERnegDRpos	80	8300000	1.00087e+07
ATP1B1	AT1B1_HUMAN	ERposDRneg	28	9400000	1.59834e+07
ATP1B1	AT1B1_HUMAN	ERnegDRpos	8	10000000	9.09038e+06
ATP1B1	AT1B1_HUMAN	ERnegDRpos	78	11000000	1.73323e+07
ATP1B1	AT1B1_HUMAN	ERnegDRpos	25	12000000	1.68821e+07
ATP1B1	AT1B1_HUMAN	ERnegDRneg	12	14000000	2.13477e+07
ATP1B1	AT1B1_HUMAN	ERposDRneg	14	16000000	1.71891e+07
ATP1B1	AT1B1_HUMAN	ERposDRpos	45	17000000	1.67415e+07
ATP1B1	AT1B1_HUMAN	ERnegDRpos	16	18000000	1.25126e+07
ATP1B1	AT1B1_HUMAN	ERposDRneg	24	18000000	1.4181e+07
ATP1B1	AT1B1_HUMAN	ERnegDRpos	62	20000000	3.23767e+07
ATP1B1	AT1B1_HUMAN	ERnegDRneg	31	20000000	2.99177e+07
ATP1B1	AT1B1_HUMAN	ERnegDRneg	22	21000000	2.25607e+07
ATP1B1	AT1B1_HUMAN	ERposDRpos	53	21000000	9926700
ATP1B1	AT1B1_HUMAN	ERposDRneg	41	21000000	20680625
ATP1B1	AT1B1_HUMAN	ERposDRneg	68	21000000	1.30614e+07
ATP1B1	AT1B1_HUMAN	ERposDRpos	59	22000000	1.73323e+07
ATP1B1	AT1B1_HUMAN	ERposDRpos	71	23000000	3.02003e+07
ATP1B1	AT1B1_HUMAN	ERnegDRneg	4	24000000	23635000
ATP1B1	AT1B1_HUMAN	ERposDRpos	27	24000000	2.89408e+07
ATP1B1	AT1B1_HUMAN	ERposDRneg	15	25000000	2.2726e+07
ATP1B1	AT1B1_HUMAN	ERnegDRneg	32	25000000	3.43532e+07
ATP1B1	AT1B1_HUMAN	ERnegDRpos	38	25000000	1.96958e+07
ATP1B1	AT1B1_HUMAN	ERposDRpos	65	28000000	1.74153e+07
ATP1B1	AT1B1_HUMAN	ERnegDRneg	56	29000000	2.28472e+07
ATP1B1	AT1B1_HUMAN	ERnegDRpos	2	31000000	3.81607e+07
ATP1B1	AT1B1_HUMAN	ERnegDRpos	19	31000000	3.33039e+07
ATP1B1	AT1B1_HUMAN	ERnegDRpos	21	34000000	4.56585e+07
ATP1B1	AT1B1_HUMAN	ERnegDRneg	23	34000000	3.34829e+07
ATP1B1	AT1B1_HUMAN	ERnegDRneg	51	36000000	3.03879e+07
ATP1B1	AT1B1_HUMAN	ERposDRneg	64	36000000	5.45423e+07
ATP1B1	AT1B1_HUMAN	ERposDRpos	35	37000000	5.11401e+07
ATP1B1	AT1B1_HUMAN	ERnegDRpos	7	38000000	2.64156e+07
ATP1B1	AT1B1_HUMAN	ERnegDRneg	48	38000000	5.1915e+07
ATP1B1	AT1B1_HUMAN	ERposDRneg	66	39000000	6.67946e+07
ATP1B1	AT1B1_HUMAN	ERnegDRpos	50	40000000	3.37643e+07
ATP1B1	AT1B1_HUMAN	ERposDRneg	55	40000000	3.63615e+07
ATP1B1	AT1B1_HUMAN	ERposDRneg	30	41000000	4.03765e+07
ATP1B1	AT1B1_HUMAN	ERposDRpos	26	53000000	4.8179e+07
ATP1B1	AT1B1_HUMAN	ERposDRpos	3	53000000	4.8179e+07
ATP1B1	AT1B1_HUMAN	ERnegDRpos	5	56000000	5.51483e+07
ATP1B1	AT1B1_HUMAN	ERnegDRpos	46	57000000	23227500
ATP1B1	AT1B1_HUMAN	ERposDRpos	79	58000000	1.42795e+08
ATP1B1	AT1B1_HUMAN	ERposDRpos	37	59000000	69723250
ATP1B1	AT1B1_HUMAN	ERposDRpos	70	63000000	74450250
ATP1B1	AT1B1_HUMAN	ERposDRpos	44	65000000	3.0123e+07
ATP1B1	AT1B1_HUMAN	ERnegDRneg	69	72000000	5.6724e+07
ATP1B1	AT1B1_HUMAN	ERnegDRneg	1	74000000	8.87812e+07
ATP1B1	AT1B1_HUMAN	ERnegDRneg	20	89000000	6.18681e+07
ATP1B1	AT1B1_HUMAN	ERnegDRpos	74	90000000	7.87833e+07
ATP1B1	AT1B1_HUMAN	ERnegDRpos	13	93000000	9.99116e+07
ATP1B1	AT1B1_HUMAN	ERnegDRneg	72	95000000	1.30542e+08
ATP1B1	AT1B1_HUMAN	ERposDRneg	33	95000000	8.01902e+07
ATP1B1	AT1B1_HUMAN	ERnegDRneg	73	100000000	7.16212e+07
ATP1B1	AT1B1_HUMAN	ERnegDRneg	61	130000000	1.28023e+08
ATP1B1	AT1B1_HUMAN	ERnegDRneg	18	130000000	1.55179e+08
ATP1B1	AT1B1_HUMAN	ERposDRpos	60	140000000	1.27265e+08
ATP1B1	AT1B1_HUMAN	ERnegDRpos	75	190000000	1.72717e+08
ATP1B1	AT1B1_HUMAN	ERposDRneg	47	230000000	2.47093e+08
ATP1B1	AT1B1_HUMAN	ERposDRpos	43	240000000	118175000
ATP1B1	AT1B1_HUMAN	ERnegDRneg	54	240000000	2.18169e+08
ATP1B1	AT1B1_HUMAN	ERposDRpos	42	260000000	245804000
ATP1B1	AT1B1_HUMAN	ERposDRpos	57	330000000	2.78555e+08
ATP1B2	AT1B2_HUMAN	ERnegDRpos	50	150000	126616
ATP1B3	AT1B3_HUMAN	ERnegDRneg	11	1000000	909038
ATP1B3	AT1B3_HUMAN	ERposDRneg	58	1300000	3.13526e+06
ATP1B3	AT1B3_HUMAN	ERnegDRpos	80	2300000	2.77349e+06
ATP1B3	AT1B3_HUMAN	ERnegDRpos	9	2400000	2836200
ATP1B3	AT1B3_HUMAN	ERposDRneg	66	3100000	5.30931e+06
ATP1B3	AT1B3_HUMAN	ERnegDRpos	16	4000000	2.78059e+06
ATP1B3	AT1B3_HUMAN	ERposDRpos	59	4200000	3308900
ATP1B3	AT1B3_HUMAN	ERposDRpos	70	4900000	5790575
ATP1B3	AT1B3_HUMAN	ERnegDRneg	12	5400000	8.23413e+06
ATP1B3	AT1B3_HUMAN	ERnegDRpos	50	7700000	6499625
ATP1B3	AT1B3_HUMAN	ERnegDRpos	25	8400000	11817500
ATP1B3	AT1B3_HUMAN	ERnegDRpos	74	8900000	7.7908e+06
ATP1B3	AT1B3_HUMAN	ERnegDRpos	49	9200000	11817500
ATP1B3	AT1B3_HUMAN	ERposDRneg	34	11000000	1.18175e+07
ATP1B3	AT1B3_HUMAN	ERnegDRpos	21	11000000	1.47719e+07
ATP1B3	AT1B3_HUMAN	ERposDRpos	27	12000000	1.44704e+07
ATP1B3	AT1B3_HUMAN	ERnegDRpos	78	13000000	2.04837e+07
ATP1B3	AT1B3_HUMAN	ERnegDRpos	8	13000000	11817500
ATP1B3	AT1B3_HUMAN	ERnegDRpos	19	13000000	1.39661e+07
ATP1B3	AT1B3_HUMAN	ERnegDRpos	38	13000000	1.02418e+07
ATP1B3	AT1B3_HUMAN	ERnegDRneg	23	13000000	1.28023e+07
ATP1B3	AT1B3_HUMAN	ERposDRpos	71	14000000	1.83828e+07
ATP1B3	AT1B3_HUMAN	ERposDRneg	15	14000000	1.27265e+07
ATP1B3	AT1B3_HUMAN	ERposDRneg	41	15000000	14771875
ATP1B3	AT1B3_HUMAN	ERposDRpos	26	16000000	1.45446e+07
ATP1B3	AT1B3_HUMAN	ERposDRneg	33	17000000	1.43498e+07
ATP1B3	AT1B3_HUMAN	ERposDRpos	42	18000000	17017200
ATP1B3	AT1B3_HUMAN	ERposDRpos	44	19000000	8.8052e+06
ATP1B3	AT1B3_HUMAN	ERnegDRneg	69	19000000	1.49688e+07
ATP1B3	AT1B3_HUMAN	ERposDRneg	24	20000000	1.57567e+07
ATP1B3	AT1B3_HUMAN	ERposDRneg	6	20000000	2.59725e+07
ATP1B3	AT1B3_HUMAN	ERnegDRpos	62	21000000	3.39955e+07
ATP1B3	AT1B3_HUMAN	ERnegDRneg	48	21000000	2.86899e+07
ATP1B3	AT1B3_HUMAN	ERposDRpos	79	24000000	59087500
ATP1B3	AT1B3_HUMAN	ERnegDRneg	4	26000000	2.56046e+07
ATP1B3	AT1B3_HUMAN	ERnegDRneg	56	26000000	2.04837e+07
ATP1B3	AT1B3_HUMAN	ERnegDRpos	2	26000000	3.20057e+07
ATP1B3	AT1B3_HUMAN	ERnegDRneg	22	27000000	2.90066e+07
ATP1B3	AT1B3_HUMAN	ERnegDRpos	5	27000000	26589375
ATP1B3	AT1B3_HUMAN	ERposDRneg	30	27000000	26589375
ATP1B3	AT1B3_HUMAN	ERposDRpos	35	27000000	3.73184e+07
ATP1B3	AT1B3_HUMAN	ERposDRpos	3	27000000	2.4544e+07
ATP1B3	AT1B3_HUMAN	ERnegDRneg	18	30000000	3.58106e+07
ATP1B3	AT1B3_HUMAN	ERnegDRneg	61	30000000	29543750
ATP1B3	AT1B3_HUMAN	ERnegDRneg	73	30000000	2.14864e+07
ATP1B3	AT1B3_HUMAN	ERnegDRneg	1	33000000	3.95916e+07
ATP1B3	AT1B3_HUMAN	ERnegDRneg	31	37000000	5.53478e+07
ATP1B3	AT1B3_HUMAN	ERposDRneg	47	38000000	4.08241e+07
ATP1B3	AT1B3_HUMAN	ERnegDRneg	32	38000000	5.22169e+07
ATP1B3	AT1B3_HUMAN	ERnegDRpos	7	42000000	2.91962e+07
ATP1B3	AT1B3_HUMAN	ERposDRneg	14	45000000	4.83443e+07
ATP1B3	AT1B3_HUMAN	ERnegDRneg	20	48000000	3.33671e+07
ATP1B3	AT1B3_HUMAN	ERposDRpos	29	51000000	6.02693e+07
ATP1B3	AT1B3_HUMAN	ERposDRneg	55	51000000	4.6361e+07
ATP1B3	AT1B3_HUMAN	ERposDRpos	53	53000000	25053100
ATP1B3	AT1B3_HUMAN	ERposDRpos	65	63000000	3.91843e+07
ATP1B3	AT1B3_HUMAN	ERnegDRneg	54	75000000	6.81779e+07
ATP1B3	AT1B3_HUMAN	ERnegDRneg	51	81000000	6.83727e+07
ATP1B3	AT1B3_HUMAN	ERnegDRpos	46	87000000	35452500
ATP1B3	AT1B3_HUMAN	ERnegDRpos	75	96000000	8.72677e+07
ATP1B3	AT1B3_HUMAN	ERnegDRneg	72	100000000	1.37413e+08
ATP1B3	AT1B3_HUMAN	ERposDRneg	64	130000000	1.96958e+08
ATP1B3	AT1B3_HUMAN	ERposDRneg	28	140000000	2.3805e+08
ATP1B3	AT1B3_HUMAN	ERposDRpos	57	150000000	1.26616e+08
ATP1B3	AT1B3_HUMAN	ERposDRpos	60	200000000	1.81808e+08
ATP1B3	AT1B3_HUMAN	ERposDRneg	68	230000000	1.43054e+08
ATP1B3	AT1B3_HUMAN	ERposDRpos	43	250000000	1.23099e+08
CREBL1	ATF6B_HUMAN	ERposDRpos	60	2300000	2.09079e+06
ADAMTSL4	ATL4_HUMAN	ERposDRneg	28	720000	1.22426e+06
ADAMTSL4	ATL4_HUMAN	ERposDRpos	79	990000	2.43736e+06
ADAMTSL4	ATL4_HUMAN	ERnegDRneg	31	1300000	1.94465e+06
ADAMTSL4	ATL4_HUMAN	ERnegDRneg	51	1300000	1.09734e+06
ADAMTSL4	ATL4_HUMAN	ERposDRneg	68	5100000	3.17207e+06
ADAMTSL4	ATL4_HUMAN	ERposDRpos	60	7000000	6.36327e+06
ATRN	ATRN_HUMAN	ERnegDRpos	16	320000	222447
ATRN	ATRN_HUMAN	ERposDRneg	15	370000	336344
ATRN	ATRN_HUMAN	ERnegDRpos	8	430000	390887
ATRN	ATRN_HUMAN	ERnegDRneg	69	470000	370282
ATRN	ATRN_HUMAN	ERposDRpos	17	530000	569389
ATRN	ATRN_HUMAN	ERnegDRpos	5	590000	581027
ATRN	ATRN_HUMAN	ERnegDRneg	32	630000	865701
ATRN	ATRN_HUMAN	ERposDRneg	55	700000	636327
ATRN	ATRN_HUMAN	ERposDRpos	60	880000	799954
ATRN	ATRN_HUMAN	ERposDRpos	3	890000	809044
ATRN	ATRN_HUMAN	ERnegDRpos	9	930000	1.09903e+06
ATRN	ATRN_HUMAN	ERposDRneg	47	3400000	3.65268e+06
ATRN	ATRN_HUMAN	ERnegDRpos	46	3400000	1385500
ATRN	ATRN_HUMAN	ERnegDRneg	20	4600000	3.19768e+06
ATRN	ATRN_HUMAN	ERposDRpos	43	4800000	2363500
ADAMTS16	ATS16_HUMAN	ERposDRpos	42	360000	340344
ADAMTS16	ATS16_HUMAN	ERnegDRneg	22	1100000	1181750
B3GNT1	B3GN1_HUMAN	ERposDRpos	43	3200000	1.57567e+06
B3GNT1	B3GN1_HUMAN	ERposDRpos	60	6000000	5.45423e+06
B3GNT2	B3GN2_HUMAN	ERnegDRneg	31	440000	658190
B3GNT2	B3GN2_HUMAN	ERposDRneg	28	800000	1.36029e+06
B3GNT2	B3GN2_HUMAN	ERnegDRneg	32	830000	1.14053e+06
B3GNT2	B3GN2_HUMAN	ERnegDRneg	18	1200000	1.43242e+06
B3GNT2	B3GN2_HUMAN	ERnegDRpos	75	1200000	1.09085e+06
B3GNT2	B3GN2_HUMAN	ERnegDRneg	48	1500000	2.04928e+06
B3GNT2	B3GN2_HUMAN	ERposDRpos	43	5400000	2.65894e+06
B3GNT2	B3GN2_HUMAN	ERposDRpos	57	6900000	5.82434e+06
B3GNT2	B3GN2_HUMAN	ERnegDRneg	72	7600000	1.04434e+07
BSG	BASI_HUMAN	ERposDRpos	42	370000	349798
BSG	BASI_HUMAN	ERposDRneg	58	540000	1.30234e+06
BSG	BASI_HUMAN	ERnegDRpos	62	820000	1.32745e+06
BSG	BASI_HUMAN	ERnegDRpos	46	1400000	570500
BSG	BASI_HUMAN	ERnegDRpos	50	1600000	1.35057e+06
BSG	BASI_HUMAN	ERposDRpos	17	3300000	3.54525e+06
BSG	BASI_HUMAN	ERposDRpos	45	3300000	3.24981e+06
BSG	BASI_HUMAN	ERnegDRpos	78	4600000	7.24807e+06
BSG	BASI_HUMAN	ERposDRpos	27	5400000	6.51168e+06
BSG	BASI_HUMAN	ERnegDRneg	48	6700000	9.15344e+06
BSG	BASI_HUMAN	ERnegDRpos	80	7300000	8.80283e+06
BSG	BASI_HUMAN	ERposDRneg	55	8000000	7.27231e+06
BSG	BASI_HUMAN	ERposDRneg	47	8100000	8.70198e+06
BSG	BASI_HUMAN	ERposDRneg	33	8100000	6.83727e+06
BSG	BASI_HUMAN	ERnegDRneg	11	8200000	7.45412e+06
BSG	BASI_HUMAN	ERnegDRneg	61	8600000	8.46921e+06
BSG	BASI_HUMAN	ERnegDRpos	9	9100000	10753925
BSG	BASI_HUMAN	ERposDRneg	41	9300000	9.15856e+06
BSG	BASI_HUMAN	ERnegDRneg	63	10000000	8.15e+06
BSG	BASI_HUMAN	ERposDRneg	66	11000000	1.88395e+07
BSG	BASI_HUMAN	ERnegDRpos	13	11000000	1.18175e+07
BSG	BASI_HUMAN	ERnegDRpos	16	12000000	8.34176e+06
BSG	BASI_HUMAN	ERnegDRneg	20	13000000	9.03691e+06
BSG	BASI_HUMAN	ERnegDRpos	25	13000000	1.8289e+07
BSG	BASI_HUMAN	ERnegDRpos	19	13000000	1.39661e+07
BSG	BASI_HUMAN	ERposDRpos	3	14000000	1.27265e+07
BSG	BASI_HUMAN	ERposDRneg	36	14000000	11817500
BSG	BASI_HUMAN	ERposDRpos	37	14000000	1.65445e+07
BSG	BASI_HUMAN	ERposDRpos	29	15000000	17726250
BSG	BASI_HUMAN	ERnegDRneg	22	16000000	1.71891e+07
BSG	BASI_HUMAN	ERnegDRpos	21	17000000	2.28293e+07
BSG	BASI_HUMAN	ERposDRpos	70	17000000	20089750
BSG	BASI_HUMAN	ERposDRneg	30	17000000	1.67415e+07
BSG	BASI_HUMAN	ERnegDRneg	1	17000000	2.03957e+07
BSG	BASI_HUMAN	ERnegDRneg	18	19000000	2.26801e+07
BSG	BASI_HUMAN	ERnegDRpos	49	20000000	2.56902e+07
BSG	BASI_HUMAN	ERposDRneg	6	21000000	2.72712e+07
BSG	BASI_HUMAN	ERnegDRpos	38	21000000	1.65445e+07
BSG	BASI_HUMAN	ERnegDRneg	12	22000000	3.35465e+07
BSG	BASI_HUMAN	ERposDRpos	65	24000000	1.49274e+07
BSG	BASI_HUMAN	ERnegDRpos	7	25000000	1.73787e+07
BSG	BASI_HUMAN	ERposDRneg	24	29000000	2.28472e+07
BSG	BASI_HUMAN	ERposDRpos	57	31000000	2.61673e+07
BSG	BASI_HUMAN	ERposDRneg	15	32000000	2.90892e+07
BSG	BASI_HUMAN	ERposDRpos	35	33000000	4.56114e+07
BSG	BASI_HUMAN	ERnegDRpos	5	33000000	32498125
BSG	BASI_HUMAN	ERnegDRneg	56	35000000	2.75742e+07
BSG	BASI_HUMAN	ERnegDRneg	54	37000000	3.36344e+07
BSG	BASI_HUMAN	ERnegDRneg	4	42000000	41361250
BSG	BASI_HUMAN	ERposDRpos	26	45000000	4.09067e+07
BSG	BASI_HUMAN	ERnegDRneg	23	48000000	47270000
BSG	BASI_HUMAN	ERnegDRpos	8	51000000	4.6361e+07
BSG	BASI_HUMAN	ERnegDRneg	31	51000000	7.62902e+07
BSG	BASI_HUMAN	ERnegDRneg	32	59000000	8.10735e+07
BSG	BASI_HUMAN	ERnegDRpos	2	72000000	88631250
BSG	BASI_HUMAN	ERnegDRneg	69	77000000	6.06632e+07
BSG	BASI_HUMAN	ERposDRpos	71	87000000	1.14236e+08
BSG	BASI_HUMAN	ERposDRpos	79	93000000	2.28964e+08
BSG	BASI_HUMAN	ERnegDRneg	51	94000000	7.93461e+07
BSG	BASI_HUMAN	ERposDRneg	14	120000000	1.28918e+08
BSG	BASI_HUMAN	ERposDRneg	64	130000000	1.96958e+08
BSG	BASI_HUMAN	ERposDRneg	68	150000000	9.32961e+07
BSG	BASI_HUMAN	ERposDRneg	28	170000000	2.89061e+08
BSG	BASI_HUMAN	ERnegDRneg	73	220000000	1.57567e+08
BSG	BASI_HUMAN	ERnegDRpos	75	390000000	354525000
BSG	BASI_HUMAN	ERposDRpos	60	390000000	354525000
BSG	BASI_HUMAN	ERnegDRneg	72	570000000	7.83253e+08
BSG	BASI_HUMAN	ERposDRpos	43	860000000	4.2346e+08
GLB1	BGAL_HUMAN	ERnegDRpos	49	510000	655101
GLB1	BGAL_HUMAN	ERnegDRneg	51	600000	506464
GLB1	BGAL_HUMAN	ERposDRpos	57	980000	827225
GLB1	BGAL_HUMAN	ERposDRpos	70	1100000	1299925
GLB1	BGAL_HUMAN	ERnegDRneg	69	1100000	866617
GLB1	BGAL_HUMAN	ERposDRpos	60	1400000	1.27265e+06
GLB1	BGAL_HUMAN	ERposDRneg	64	1400000	2.12109e+06
GLB1	BGAL_HUMAN	ERposDRpos	71	1700000	2.23219e+06
GLB1	BGAL_HUMAN	ERnegDRpos	78	1800000	2836200
GLB1	BGAL_HUMAN	ERnegDRneg	54	1800000	1.63627e+06
GLB1	BGAL_HUMAN	ERnegDRpos	75	2100000	1.90898e+06
GLB1	BGAL_HUMAN	ERnegDRneg	72	3100000	4.2598e+06
GLB1	BGAL_HUMAN	ERposDRpos	43	8900000	4.38232e+06
GUSB	BGLR_HUMAN	ERposDRpos	26	82000	74541.2
GUSB	BGLR_HUMAN	ERposDRneg	39	210000	1.90898e+06
GUSB	BGLR_HUMAN	ERposDRneg	34	210000	225607
GUSB	BGLR_HUMAN	ERposDRneg	33	290000	244791
GUSB	BGLR_HUMAN	ERnegDRpos	2	320000	393917
GUSB	BGLR_HUMAN	ERnegDRpos	21	410000	550588
GUSB	BGLR_HUMAN	ERnegDRpos	7	620000	430991
GUSB	BGLR_HUMAN	ERnegDRneg	23	630000	620419
GUSB	BGLR_HUMAN	ERposDRpos	29	690000	815408
GUSB	BGLR_HUMAN	ERnegDRneg	32	770000	1.05808e+06
GUSB	BGLR_HUMAN	ERnegDRneg	1	790000	947799
GUSB	BGLR_HUMAN	ERposDRpos	3	1100000	999942
GUSB	BGLR_HUMAN	ERnegDRpos	75	1100000	999942
GUSB	BGLR_HUMAN	ERposDRpos	35	1300000	1.79681e+06
GUSB	BGLR_HUMAN	ERnegDRpos	9	1400000	1654450
GUSB	BGLR_HUMAN	ERposDRpos	79	1500000	3.69297e+06
GUSB	BGLR_HUMAN	ERnegDRpos	19	1600000	1.71891e+06
GUSB	BGLR_HUMAN	ERnegDRpos	8	1700000	1.54537e+06
GUSB	BGLR_HUMAN	ERnegDRneg	4	1700000	1.67415e+06
GUSB	BGLR_HUMAN	ERnegDRneg	31	2200000	3.29095e+06
GUSB	BGLR_HUMAN	ERnegDRpos	5	2400000	2363500
GUSB	BGLR_HUMAN	ERnegDRneg	48	2500000	3.41546e+06
GUSB	BGLR_HUMAN	ERnegDRneg	63	2700000	2200500
GUSB	BGLR_HUMAN	ERnegDRpos	80	2800000	3.37643e+06
GUSB	BGLR_HUMAN	ERposDRneg	55	2900000	2.63621e+06
GUSB	BGLR_HUMAN	ERnegDRpos	78	2900000	4.56943e+06
GUSB	BGLR_HUMAN	ERposDRpos	71	3000000	3.93917e+06
GUSB	BGLR_HUMAN	ERnegDRpos	25	3100000	4.36122e+06
GUSB	BGLR_HUMAN	ERposDRneg	14	3200000	3.43782e+06
GUSB	BGLR_HUMAN	ERposDRpos	70	3600000	4254300
GUSB	BGLR_HUMAN	ERnegDRneg	61	4100000	4.03765e+06
GUSB	BGLR_HUMAN	ERnegDRpos	49	4200000	5.39495e+06
GUSB	BGLR_HUMAN	ERposDRneg	52	4700000	6.10354e+06
GUSB	BGLR_HUMAN	ERposDRneg	28	4900000	8.33176e+06
GUSB	BGLR_HUMAN	ERposDRneg	41	5300000	5.2194e+06
GUSB	BGLR_HUMAN	ERposDRpos	60	5400000	4.90881e+06
GUSB	BGLR_HUMAN	ERnegDRneg	72	6000000	8.24477e+06
GUSB	BGLR_HUMAN	ERnegDRneg	18	7200000	8.59455e+06
GUSB	BGLR_HUMAN	ERposDRneg	66	7300000	1.25026e+07
GUSB	BGLR_HUMAN	ERnegDRneg	51	7700000	6499625
GUSB	BGLR_HUMAN	ERnegDRpos	38	7900000	6.22388e+06
GUSB	BGLR_HUMAN	ERposDRpos	57	8000000	6.75286e+06
GUSB	BGLR_HUMAN	ERposDRneg	47	8600000	9.23914e+06
GUSB	BGLR_HUMAN	ERposDRpos	59	9100000	7.16928e+06
GUSB	BGLR_HUMAN	ERnegDRneg	11	12000000	1.09085e+07
GUSB	BGLR_HUMAN	ERnegDRneg	54	14000000	1.27265e+07
GUSB	BGLR_HUMAN	ERnegDRneg	20	14000000	9.73206e+06
GUSB	BGLR_HUMAN	ERposDRpos	43	17000000	8.37073e+06
GUSB	BGLR_HUMAN	ERposDRpos	42	20000000	18908000
GUSB	BGLR_HUMAN	ERposDRpos	45	25000000	2.46198e+07
GUSB	BGLR_HUMAN	ERnegDRpos	46	2400000000	9.78e+08
LPLUNC1	BPIB1_HUMAN	ERnegDRpos	80	310000	373819
LPLUNC1	BPIB1_HUMAN	ERnegDRpos	21	1400000	1.88006e+06
LPLUNC1	BPIB1_HUMAN	ERposDRpos	53	1800000	850860
LPLUNC1	BPIB1_HUMAN	ERnegDRpos	16	5900000	4.10137e+06
LPLUNC1	BPIB1_HUMAN	ERposDRneg	47	25000000	2.6858e+07
LPLUNC1	BPIB1_HUMAN	ERposDRneg	33	28000000	23635000
LPLUNC1	BPIB1_HUMAN	ERnegDRpos	49	37000000	4.75269e+07
LPLUNC1	BPIB1_HUMAN	ERposDRneg	14	50000000	5.37159e+07
LPLUNC1	BPIB1_HUMAN	ERnegDRneg	20	110000000	7.64662e+07
LPLUNC1	BPIB1_HUMAN	ERnegDRneg	61	160000000	1.57567e+08
BPIL1	BPIB2_HUMAN	ERposDRpos	42	2500000	2363500
BPIL1	BPIB2_HUMAN	ERposDRneg	33	17000000	1.43498e+07
BST1	BST1_HUMAN	ERnegDRneg	22	460000	494186
BST1	BST1_HUMAN	ERnegDRneg	32	490000	673323
BST1	BST1_HUMAN	ERnegDRpos	62	540000	874171
BST1	BST1_HUMAN	ERnegDRpos	7	770000	535263
BST1	BST1_HUMAN	ERnegDRpos	5	790000	777985
BST1	BST1_HUMAN	ERposDRpos	57	940000	793461
BST1	BST1_HUMAN	ERposDRpos	59	1000000	787833
BST1	BST1_HUMAN	ERnegDRneg	18	1000000	1.19369e+06
BST1	BST1_HUMAN	ERnegDRpos	38	1100000	866617
BST1	BST1_HUMAN	ERnegDRpos	9	1100000	1299925
BST1	BST1_HUMAN	ERnegDRneg	12	1100000	1.67732e+06
BST1	BST1_HUMAN	ERposDRpos	35	1100000	1.52038e+06
BST1	BST1_HUMAN	ERposDRneg	41	1200000	1181750
BST1	BST1_HUMAN	ERposDRpos	29	1200000	1418100
BST1	BST1_HUMAN	ERposDRneg	64	1300000	1.96958e+06
BST1	BST1_HUMAN	ERnegDRneg	11	1500000	1.36356e+06
BST1	BST1_HUMAN	ERposDRpos	45	1500000	1.47719e+06
BST1	BST1_HUMAN	ERposDRpos	70	1500000	1.77263e+06
BST1	BST1_HUMAN	ERnegDRpos	25	1600000	2.25095e+06
BST1	BST1_HUMAN	ERposDRneg	52	1600000	2.0778e+06
BST1	BST1_HUMAN	ERnegDRpos	50	1600000	1.35057e+06
BST1	BST1_HUMAN	ERposDRpos	79	1700000	4.18536e+06
BST1	BST1_HUMAN	ERnegDRneg	73	1900000	1.3608e+06
BST1	BST1_HUMAN	ERposDRpos	42	2000000	1890800
BST1	BST1_HUMAN	ERnegDRneg	48	2100000	2.86899e+06
BST1	BST1_HUMAN	ERnegDRneg	4	2300000	2.26502e+06
BST1	BST1_HUMAN	ERnegDRneg	31	2400000	3.59013e+06
BST1	BST1_HUMAN	ERposDRpos	71	2500000	3.28264e+06
BST1	BST1_HUMAN	ERnegDRpos	80	2600000	3.13526e+06
BST1	BST1_HUMAN	ERposDRneg	28	2700000	4.59097e+06
BST1	BST1_HUMAN	ERnegDRpos	8	2900000	2.63621e+06
BST1	BST1_HUMAN	ERnegDRneg	72	3100000	4.2598e+06
BST1	BST1_HUMAN	ERnegDRneg	56	3200000	2.52107e+06
BST1	BST1_HUMAN	ERnegDRpos	78	3400000	5.35727e+06
BST1	BST1_HUMAN	ERposDRneg	14	4100000	4.4047e+06
BST1	BST1_HUMAN	ERnegDRneg	63	4100000	3341500
BST1	BST1_HUMAN	ERposDRpos	60	4900000	4.45429e+06
BST1	BST1_HUMAN	ERnegDRpos	49	5200000	6.67946e+06
BST1	BST1_HUMAN	ERnegDRneg	69	6300000	4963350
BST1	BST1_HUMAN	ERposDRpos	53	7400000	3497980
BST1	BST1_HUMAN	ERposDRpos	43	7500000	3.69297e+06
BST1	BST1_HUMAN	ERposDRneg	47	7800000	8.37968e+06
BST1	BST1_HUMAN	ERposDRneg	55	11000000	9.99942e+06
BST1	BST1_HUMAN	ERnegDRneg	51	15000000	1.26616e+07
BST1	BST1_HUMAN	ERnegDRpos	2	16000000	1.96958e+07
BST1	BST1_HUMAN	ERposDRneg	68	18000000	1.11955e+07
BST1	BST1_HUMAN	ERnegDRpos	75	32000000	2.90892e+07
BST2	BST2_HUMAN	ERposDRpos	77	210000	1.55105e+06
BST2	BST2_HUMAN	ERposDRneg	55	1200000	1.09085e+06
BST2	BST2_HUMAN	ERposDRpos	59	1700000	1.33932e+06
BST2	BST2_HUMAN	ERnegDRpos	50	3400000	2.86996e+06
BST2	BST2_HUMAN	ERnegDRpos	2	4600000	5.66255e+06
BST2	BST2_HUMAN	ERnegDRpos	80	5600000	6.75286e+06
BST2	BST2_HUMAN	ERnegDRpos	38	8300000	6.53902e+06
BST2	BST2_HUMAN	ERposDRneg	58	8900000	2.14644e+07
BST2	BST2_HUMAN	ERposDRneg	6	9300000	1.20772e+07
BST2	BST2_HUMAN	ERnegDRpos	49	9400000	1.20744e+07
BST2	BST2_HUMAN	ERnegDRpos	16	9800000	6.81244e+06
BST2	BST2_HUMAN	ERnegDRpos	9	10000000	11817500
BST2	BST2_HUMAN	ERposDRpos	35	11000000	1.52038e+07
BST2	BST2_HUMAN	ERposDRpos	40	12000000	11817500
BST2	BST2_HUMAN	ERnegDRpos	7	12000000	8.34176e+06
BST2	BST2_HUMAN	ERposDRpos	71	15000000	1.96958e+07
BST2	BST2_HUMAN	ERposDRpos	45	16000000	1.57567e+07
BST2	BST2_HUMAN	ERnegDRpos	5	17000000	1.67415e+07
BST2	BST2_HUMAN	ERposDRneg	66	17000000	2.91156e+07
BST2	BST2_HUMAN	ERposDRpos	26	19000000	1.72717e+07
BST2	BST2_HUMAN	ERposDRneg	15	19000000	1.72717e+07
BST2	BST2_HUMAN	ERposDRneg	24	22000000	1.73323e+07
BST2	BST2_HUMAN	ERnegDRneg	69	22000000	1.73323e+07
BST2	BST2_HUMAN	ERposDRpos	44	22000000	1.01955e+07
BST2	BST2_HUMAN	ERposDRneg	14	24000000	2.57836e+07
BST2	BST2_HUMAN	ERnegDRpos	21	24000000	3.22295e+07
BST2	BST2_HUMAN	ERnegDRneg	23	26000000	2.56046e+07
BST2	BST2_HUMAN	ERposDRneg	34	27000000	2.90066e+07
BST2	BST2_HUMAN	ERnegDRpos	13	28000000	3.00809e+07
BST2	BST2_HUMAN	ERposDRpos	70	29000000	34270750
BST2	BST2_HUMAN	ERposDRpos	29	31000000	36634250
BST2	BST2_HUMAN	ERposDRpos	53	31000000	14653700
BST2	BST2_HUMAN	ERnegDRneg	20	35000000	2.43301e+07
BST2	BST2_HUMAN	ERnegDRneg	31	36000000	5.38519e+07
BST2	BST2_HUMAN	ERnegDRneg	48	37000000	5.05488e+07
BST2	BST2_HUMAN	ERnegDRpos	78	38000000	5.98753e+07
BST2	BST2_HUMAN	ERnegDRneg	56	43000000	3.38768e+07
BST2	BST2_HUMAN	ERnegDRpos	75	46000000	4.18158e+07
BST2	BST2_HUMAN	ERnegDRpos	19	46000000	4.94186e+07
BST2	BST2_HUMAN	ERposDRpos	42	48000000	45379200
BST2	BST2_HUMAN	ERposDRpos	37	49000000	5.79058e+07
BST2	BST2_HUMAN	ERnegDRpos	25	49000000	6.89354e+07
BST2	BST2_HUMAN	ERnegDRpos	62	53000000	8.57983e+07
BST2	BST2_HUMAN	ERnegDRneg	12	58000000	8.84406e+07
BST2	BST2_HUMAN	ERposDRpos	60	61000000	5.54513e+07
BST2	BST2_HUMAN	ERnegDRpos	46	65000000	26487500
BST2	BST2_HUMAN	ERnegDRneg	4	67000000	6.5981e+07
BST2	BST2_HUMAN	ERposDRpos	79	69000000	1.69877e+08
BST2	BST2_HUMAN	ERnegDRneg	11	69000000	6.27237e+07
BST2	BST2_HUMAN	ERnegDRneg	51	71000000	5.99316e+07
BST2	BST2_HUMAN	ERnegDRpos	8	74000000	6.72688e+07
BST2	BST2_HUMAN	ERnegDRneg	32	78000000	1.07182e+08
BST2	BST2_HUMAN	ERposDRneg	47	78000000	8.37968e+07
BST2	BST2_HUMAN	ERposDRneg	28	82000000	1.39429e+08
BST2	BST2_HUMAN	ERnegDRneg	73	96000000	6.87564e+07
BST2	BST2_HUMAN	ERposDRneg	64	100000000	1.51506e+08
BST2	BST2_HUMAN	ERnegDRneg	61	100000000	9.84792e+07
BST2	BST2_HUMAN	ERposDRneg	33	100000000	8.44107e+07
BST2	BST2_HUMAN	ERnegDRneg	22	110000000	1.18175e+08
BST2	BST2_HUMAN	ERposDRpos	65	110000000	6.84171e+07
BST2	BST2_HUMAN	ERnegDRneg	1	110000000	1.31972e+08
BST2	BST2_HUMAN	ERnegDRneg	18	120000000	1.43242e+08
BST2	BST2_HUMAN	ERposDRneg	30	150000000	147718750
BST2	BST2_HUMAN	ERposDRneg	41	180000000	177262500
BST2	BST2_HUMAN	ERposDRpos	3	210000000	1.90898e+08
BST2	BST2_HUMAN	ERposDRneg	68	230000000	1.43054e+08
BST2	BST2_HUMAN	ERnegDRneg	72	280000000	3.84756e+08
BST2	BST2_HUMAN	ERposDRpos	57	310000000	2.61673e+08
BST2	BST2_HUMAN	ERposDRpos	43	420000000	206806250
BST2	BST2_HUMAN	ERnegDRneg	54	1200000000	1.09085e+09
BTD	BTD_HUMAN	ERposDRneg	67	120000	1418100
BTD	BTD_HUMAN	ERnegDRpos	76	330000	3119820
BTD	BTD_HUMAN	ERposDRneg	39	440000	3.99977e+06
BTD	BTD_HUMAN	ERposDRpos	77	580000	4.28384e+06
BTD	BTD_HUMAN	ERnegDRpos	78	3200000	5.04213e+06
BTD	BTD_HUMAN	ERposDRneg	28	3700000	6.29133e+06
BTD	BTD_HUMAN	ERposDRpos	65	3900000	2.4257e+06
BTD	BTD_HUMAN	ERposDRpos	70	3900000	4608825
BTD	BTD_HUMAN	ERposDRneg	34	4800000	5.15673e+06
BTD	BTD_HUMAN	ERposDRpos	35	4900000	6.7726e+06
BTD	BTD_HUMAN	ERnegDRneg	32	5000000	6.87064e+06
BTD	BTD_HUMAN	ERnegDRpos	2	5300000	6.52424e+06
BTD	BTD_HUMAN	ERnegDRpos	62	5700000	9.22736e+06
BTD	BTD_HUMAN	ERposDRneg	64	5900000	8.93888e+06
BTD	BTD_HUMAN	ERnegDRneg	63	5900000	4808500
BTD	BTD_HUMAN	ERposDRpos	37	6200000	7.32685e+06
BTD	BTD_HUMAN	ERposDRneg	58	6900000	1.6641e+07
BTD	BTD_HUMAN	ERnegDRneg	12	7300000	1.11313e+07
BTD	BTD_HUMAN	ERnegDRneg	31	7500000	1.12191e+07
BTD	BTD_HUMAN	ERposDRpos	60	7700000	6.9996e+06
BTD	BTD_HUMAN	ERposDRneg	33	7900000	6.66845e+06
BTD	BTD_HUMAN	ERnegDRneg	4	7900000	7.77985e+06
BTD	BTD_HUMAN	ERnegDRneg	51	8000000	6.75286e+06
BTD	BTD_HUMAN	ERposDRpos	59	8100000	6381450
BTD	BTD_HUMAN	ERnegDRpos	74	8200000	7.17804e+06
BTD	BTD_HUMAN	ERposDRpos	79	8300000	2.04344e+07
BTD	BTD_HUMAN	ERposDRpos	71	8600000	1.12923e+07
BTD	BTD_HUMAN	ERposDRneg	52	8600000	1.11682e+07
BTD	BTD_HUMAN	ERnegDRneg	48	9000000	1.22957e+07
BTD	BTD_HUMAN	ERnegDRpos	49	9000000	1.15606e+07
BTD	BTD_HUMAN	ERnegDRpos	75	10000000	9.09038e+06
BTD	BTD_HUMAN	ERposDRpos	17	10000000	1.07432e+07
BTD	BTD_HUMAN	ERnegDRpos	21	10000000	1.3429e+07
BTD	BTD_HUMAN	ERposDRpos	53	10000000	4727000
BTD	BTD_HUMAN	ERposDRneg	30	11000000	1.08327e+07
BTD	BTD_HUMAN	ERnegDRpos	19	11000000	1.18175e+07
BTD	BTD_HUMAN	ERnegDRpos	80	11000000	1.32645e+07
BTD	BTD_HUMAN	ERnegDRneg	54	11000000	9.99942e+06
BTD	BTD_HUMAN	ERposDRpos	27	11000000	1.32645e+07
BTD	BTD_HUMAN	ERposDRneg	68	11000000	6.84171e+06
BTD	BTD_HUMAN	ERnegDRneg	61	11000000	1.08327e+07
BTD	BTD_HUMAN	ERposDRneg	14	11000000	1.18175e+07
BTD	BTD_HUMAN	ERnegDRneg	1	12000000	1.4397e+07
BTD	BTD_HUMAN	ERposDRneg	66	12000000	2.05522e+07
BTD	BTD_HUMAN	ERposDRpos	45	12000000	11817500
BTD	BTD_HUMAN	ERposDRneg	41	12000000	11817500
BTD	BTD_HUMAN	ERnegDRneg	69	13000000	1.02418e+07
BTD	BTD_HUMAN	ERnegDRpos	25	13000000	1.8289e+07
BTD	BTD_HUMAN	ERposDRneg	36	13000000	1.09734e+07
BTD	BTD_HUMAN	ERnegDRneg	72	13000000	1.78637e+07
BTD	BTD_HUMAN	ERnegDRneg	73	13000000	9.31076e+06
BTD	BTD_HUMAN	ERnegDRpos	7	13000000	9.03691e+06
BTD	BTD_HUMAN	ERnegDRpos	5	14000000	1.37871e+07
BTD	BTD_HUMAN	ERnegDRneg	22	14000000	1.50405e+07
BTD	BTD_HUMAN	ERnegDRpos	50	15000000	1.26616e+07
BTD	BTD_HUMAN	ERposDRpos	29	15000000	17726250
BTD	BTD_HUMAN	ERnegDRneg	11	16000000	1.45446e+07
BTD	BTD_HUMAN	ERposDRneg	47	17000000	1.82634e+07
BTD	BTD_HUMAN	ERposDRneg	24	18000000	1.4181e+07
BTD	BTD_HUMAN	ERposDRpos	3	19000000	1.72717e+07
BTD	BTD_HUMAN	ERnegDRneg	18	19000000	2.26801e+07
BTD	BTD_HUMAN	ERnegDRpos	13	21000000	2.25607e+07
BTD	BTD_HUMAN	ERposDRpos	26	21000000	1.90898e+07
BTD	BTD_HUMAN	ERnegDRpos	38	22000000	1.73323e+07
BTD	BTD_HUMAN	ERposDRneg	15	22000000	1.99988e+07
BTD	BTD_HUMAN	ERnegDRneg	10	22000000	1.52932e+07
BTD	BTD_HUMAN	ERposDRpos	42	22000000	20798800
BTD	BTD_HUMAN	ERnegDRneg	23	23000000	2.26502e+07
BTD	BTD_HUMAN	ERnegDRpos	8	24000000	2.18169e+07
BTD	BTD_HUMAN	ERnegDRpos	46	26000000	10595000
BTD	BTD_HUMAN	ERnegDRpos	9	26000000	3.07255e+07
BTD	BTD_HUMAN	ERposDRneg	6	27000000	3.50629e+07
BTD	BTD_HUMAN	ERposDRpos	57	29000000	2.44791e+07
BTD	BTD_HUMAN	ERnegDRneg	56	30000000	23635000
BTD	BTD_HUMAN	ERnegDRpos	16	31000000	2.15496e+07
BTD	BTD_HUMAN	ERposDRpos	40	31000000	3.05285e+07
BTD	BTD_HUMAN	ERposDRneg	55	34000000	3.09073e+07
BTD	BTD_HUMAN	ERposDRpos	44	37000000	1.7147e+07
BTD	BTD_HUMAN	ERnegDRneg	20	39000000	2.71107e+07
BTD	BTD_HUMAN	ERposDRpos	43	46000000	2.26502e+07
CD163	C163A_HUMAN	ERposDRpos	27	220000	265291
CD163	C163A_HUMAN	ERposDRpos	45	300000	295438
CD163	C163A_HUMAN	ERnegDRpos	50	500000	422054
[truncated: 13,579 more rows]
